# Supplementary material for: Pathways and Network Based Analysis of Candidate Genes to Reveal Cross-Talk and Specificity in the Sorghum (Sorghum bicolor (L.) Moench) Responses to Drought and It's Co-occurring Stresses
Source: Front Genet. 2018 Nov 20;9:557. doi: 10.3389/fgene.2018.00557 (PMC6255970; doi:10.3389/fgene.2018.00557)
Supplement: Table S1 — List of major drought and related stress response regulatory or functional genes (DSRhub genes) used in the pathway cross-talk analysis. [file Table_1.XLSX]

## Sheet: Transcription factor genes invo
Table S1. List of major drought stress response regulatory or functional genes used in the pathway crosstalk analysis
Drought related transcription factor supper family
TBC1 domain family member 5 homologous
TPA:Myb DNA-binding domain superfamily
TPA:RING zinc finger domain superfamily
Transcription factor DIVARICATA
Multi-bridging factor 1C (MBF-1C)
Myb-related 306
Single myb histon 4
Auxin response factor
bZIP transcription faction TRAB1-like
AP1 complex subunit mu-2
Ethylen-insensitive 2-like
Ethylene-responsive transcription factor
AP2-like ethylene-responsive transcription factor
Ethylene-responsive transcription factor
MADS-box transcription factor 50 isoform
MADS Transcription factor, partial
Probable WRKY transcription factor 53
Aldehyde dehydrogenease family 3 member a14 a22
Transcription factor DIVARICATA
Transcription factorUNE10
WRKY 74 superfamily of TFs having WRKY and zinc finger domains
ABA biosynthesis and Signaling pathways
zeaxanthin epoxidase (ZEP)
epoxycarotenoid dioxygenase (NCED)
Xanthoxin dehydrogenase XDH
ABA8 hydroxylase ABA8'OH
MCSU
CYP707A1
ABA receptors (PYR/PYL/RCAR)
protein phosphatases (PP2C)
protein kinases (SnRK2)
AREB/ABF-channels
Drought-and stress inducible regulatory protein related genes
Late embyogenesis abandant (LEA) 14-A
Ascorbate peroxidase (APX)
bZIP transcription factor TRAB1-like (TRAB1)
Calcineurin B1 (CaNB1)
Desertification-related At2g46140-like (LEA type-2)
Ethylen-insensitive 2-like (EIN2)
Geranylgeranyl transferase Type-I Superfamily (GGTase 1)
Histidine kinase 1 (HK1)
Indol-3-acetaldehyde oxidase (Indol-3-yl-AO)
probable protein phosphatase 2C 6 (PP2C-6);
Probable protein phosphatase 2C 30 (PP2C-30);
Probable Protein phosphatase 2C 68 (PP2C-68);
Protein Phosphatase 2C ABI2 (PP2C-ABI2)
Drought stress related target genes:
Alchol dehydrogenease 1(ADH-1)
Allene oxide cyclase 4 (AOC4)
Aldehyde dehydrogenase family 3 member a22 (ALDH3a22)
NADP-dependent glyceraldehyde-3-phosphate dehydrogenase (NADP-GAPDH)
aldehyde dehydrogenase Family 7 member a1 (ALDH7a1)
Probable monogalactosyl diacylglycerols (MGDG)
Aldehyde dehydrogenase Family 3 member a6 ALDH3a6
Aldehyde dehydrogenase Family 3 member a6 ALDH3a6
Indol-3-acetaldehyde oxidase (Indol-3-yl-AO)
Ribulose phosphate 3 epimerase (RPE/PPE)
NADP-dependent glyceraldehyde-3-phosphate dehydrogenase (NADP-GAPDH)
aldehyde dehydrogenase Family 7 member a1 (ALDH7a1) ALDH7a1
Aldehyde dehydrogenase Family 3 member a14 ALDH3a14
Aldehyde dehydrogenase Family 3 member a14 ALDH3a14
Indol-3-acetaldehyde oxidase (Indol-3-yl-AO)
Aldehyde dehydrogenease Family 3 Family 3 member a14 a22 ALDH3a22
desiccation-related At2g46140-like (LEA type-2)
ethylene-insensitive 2-like (EIN2)
glutathione transferase or s-transferase (GSTs)
Beta-amylase-1 (BAM1)
peroxidases 1b and 3 (POX1B/POX3)
Delta-1-pyrroline-5-carboxylate synthase (P5CS1)
Allene oxide cyclase 4 (AOC4)
Carotenoid cleavage dioxygenase (CCD)
Ggalactinol-synthase 2-like (GOLS2)
plasma membrane ATPase-like (P-ATPase)
zanthine dehydrogenase (XDH)
Heat stress related genes
heat shock 90 (HSP90)
Heat-shock 70 (HSP70)
Heat stress transcription factor B2a-like (HsfB2a)
Galactinol synthase 2-like (GOLS2)
Chtinase (Cas)
Zeaxanthin epoxidase (ZEP)
Cold stress related genes:
cold regulated 413 inner membrane 1(COR413IM1)
Low-temperrature induced protein (LTIP)
Glutathione transferase or s-transferase (GSTs)
Phosphoinsitide phospholipase C2-like protein (PLC2
Peroxidases 1b and 3 (POX1B/POX3)
Galactinol-synthase 2-like protein (GOLS2)
3 -2 5-bisphosphate Nucleotidase-like protein (BPNT1)
Probable monogalactosyl diacylglycerols (MGDGs)
Acid endochitinase-like protein (AECLP)
Allene oxide cyclase 4 (AOC4)
Salt stress related genes:
salt stress induced-hydrophobic peptide (SHP)
salt tolerance protein (STO)
Aldehyde dehydrogenase (ALDH)
Delta-1-pyrroline-5-carboxylate synthase (P5CS1)
Galactinol-synthase 2-like protein(GOLS2)
Probable monogalactosyl diacylglycerols (MGDGs)
Phosphoinsitide phospholipase C2-like protein (PLC2)
Acid endochitinase-like protein (ECLP)
Chtinase (Cas)
Allene oxide cyclase 4 (AOC4)
Oxidative stress related genes:
Glutathione transferase (GSTs)
Peroxidase 1b and peroxidase 3(POX1B/POX3)
Glycosyltransferases (GTFs)
Galactinol-sucrose galactosyltransferase (RFS)
Environmental Information Processing and Signal transduction related genes
Mitogen-activated kinase 5 isoform x2 (MAPK5)
Phosphoinositide phospholipase C 2-like (PLC2)
Probable phosphatase 2C 9 (PP2C-9)
Molybdenum cofactor sulfurase activated Kinase 5 isoform x2 (MCSUAK5)
Phosphopantetheine adenylyltransferase (PPAT)
Serine threonine-kinase (STK)
Phosphoglycerate kinase (PGK)
Phosphoribulokinase (PRK)
Carbohydrate metabolism related genes:
Acid endochitinase-like (ECLP)
Alcohol dehydrogenease 1 (ADH1)
Aldehyde dehydrogenase Family 3 member (ALDH3)
Beta-amylase-1 (BAM1)
Cellulose synthase gene family (CSC)
Chtinase (Cas)
Galactinol synthase 2-like (GOLS2)
Galactinol-sucrose galactosyltransferase (RFS)
Glycerate dehydrogenase (GDH)
NADP-dependent glyceraldehyde-3-phosphate dehydrogenase (GAPDH)
Phosphoglycerate kinase (PGK)
Phosphoinositide phospholipase C 2-like (PLC2)
RuBisCO Sb05g027870
Ribulose phosphate 3 epimerase (RPE/PPE)
Sucrose synthase (SUS)
UDP-glucose 4 epimerases (UGE)
Energy and carbon metabolism related genes
Plasma membrane ATPase-like (P-ATPase)
3,2, 5-bisphosphate nucleotidase-like (BPNT1)
Aaspartate amino transferase (AST)
NADH dehydrogenease [ubiquinone] Iron-sulfur protein (NDUFS)
Phosphoglycerate kinase (PGK)
Phosphoribulokinase (PRK)
RuBisCO
Ribulose phosphate 3 epimerase (RPE/PPE)
RNA polymerase II C-terminal domain (Pol2CTD)
Amino acid metabolism related genes
Aldehyde dehydrogenase family 3 members
Alcohol dehydrogenease 1 (ADH1)
Glutathione transferase (GSTs)
Delta-1-pyrroline-5-carboxylate synthase (P5CS1)
Glycerate dehydrogenase (GDH)
Anosylhomocysteinase (AHCY)
Arginine decarboxylase-like (ADC)
Aspartate amino transferase (AST)
Molybdenum co-factor sulfurasectivated Kinase 5 isoform x2 (MCSUAK5)
NADP-dependent glyceraldehyde-3-phosphate dehydrogenase (GAPDH)
Probable glutathionine peroxidase 2 (GPX2)
RNA polymerase II C-terminal domain (Pol2CTD)
2-Cys peroxiredoxin BAS1 (BAS1)
Biosynthesis of secondary metabolites related genes
Peroxidase (PO)
Delta-1-pyrroline-5 carboxylate synthase (P5CS1)
Xanthine dehydrogenease (XDH)
Delta-1-pyrroline-5-carboxylate synthase (P5CS1)
Aspartate amino transferase (AST)
2-Cys peroxiredoxin BAS1(BAS1)
Other plant hormone related genes:
Alcohol dehydrogenease 1 (ADH1)
Allene oxide Cyclase 4 (AOC4)
Aldehyde dehydrogenase family3 member a22 (ALDH3a22)
Zeaxanthin epoxidase (ZEP)
Carotenoid cleavage dioxygenase (CCD)
Nine-cis-epoxycarotenoid dioxygenase (NCED)
ABA8 hydroxylase (ABA8'OH)
Zerumbone synthase (ZSD1)
Aspartate amino transferase (AST)
Anosylhomocysteinase (AHCY)
Malate mitochondria-like (MDH)
Aspartate amino transferase (AST)
Aldehyde dehydrogenase Family 3 member a15 (ALDH3a15)
indol-3-acetaldehyde oxidase (AAO1)
NADP-dependent glyceraldehyde-3-phosphate dehydrogenase (GAPDH)
Aldehyde dehydrogenase Family 7 (ALDH7)
Aldehyde dehydrogenase Family 3 member a22 (ALDH3a22)
Aldehyde dehydrogenase Family 3 member a1(ALDH3a1)

## Sheet: Total pathway involved genes in
Table S1. List of major drought stress response regulatory or functional genes used in the pathway crosstalk analysis
Drought related transcription factor supper family	Protein/TF Name	Target genes
TBC1 domain family member 5 homologous	TBC1	Sb07g026900
TPA:Myb DNA-binding domain superfamily	Myb	Sb01g028870
TPA:RING zinc finger domain superfamily	TPA	Sb01g039740
Transcription factor DIVARICATA	DIVARICATA	Sb03g006450	Sb06g008585
Multi-bridging factor 1C (MBF-1C)	MBF	Sb10g023010
Myb-related 306	Myb	Sb05g021820
Single myb histon 4	Myb	Sb03g032530
Auxin response factor	ARF	Sb05g019540
bZIP transcription faction TRAB1-like	bZIP	Sb02g026570
AP1 complex subunit mu-2	AP1	Sb03g032290
Ethylen-insensitive 2-like	EI2	Sb01g011020
Ethylene-responsive transcription factor	ERTF	Sb04g006970
AP2-like ethylene-responsive transcription factor	AP2	Sb02g025080
Ethylene-responsive transcription factor	AP2/ERF	Sb04g006970
MADS-box transcription factor 50 isoform	MADS-box	Sb01g030570
MADS Transcription factor, partial	MADS	Sb01g049020
Probable WRKY transcription factor 53	WRKY	Sb03g029920
Aldehyde dehydrogenease family 3 member a14 a22	ALDH	Sb08g004840
Transcription factor DIVARICATA	DIVARICATA	Sb03g006450
Transcription factorUNE10	UNE10	Sb01g029220
WRKY 74 superfamily of TFs having WRKY and zinc finger domains	WRKY	Sb02g022280
ABA biosynthesis and Signaling pathways
zeaxanthin epoxidase	ZEP	Sb06g018220
epoxycarotenoid dioxygenase	NCED	Sb01g047540
Xanthoxin dehydrogenase	XDH	Sb01g003880
ABA8 hydroxylase	ABA8'OH	Sb07g022990
Molybdenum cofactor sulfurase activated Kinase 5 isoform x2	MCSU	Sb10g026910
CYP707A1	CYP707A1	Sb07g022990
ABA receptors	PYR/PYL/RCAR	Sb01g028330	Sb01g038150	Sb03g038600	Sb04g008040	Sb04g009280	Sb09g006700	Sb09g023180	Sb10g022200
protein phosphatases	PP2C	Sb01g039890	Sb02g022090	Sb03g026070	Sb03g029890	Sb03g032740	Sb03g039630	Sb06g001720	Sb09g026860	Sb09g029080	Sb09g030600
protein kinases	SnRK2	Sb01g007120	Sb01g033570	Sb02g039640	Sb04g022410	Sb06g033990	Sb08g019700	Sb09g021410
AREB/ABF-channels	AREB/ABF	Sb01g036810	Sb02g026570	Sb02g043620	Sb03g037740	Sb03g040510	Sb03g040970	Sb06g026410	Sb08g003760	Sb09g021580	Sb09g023920	Sb10g007090
Drought inducible regulatory protein related genes
Late embyogenesis abandant 14-a	LEA14a	Sb07g024160
Ascorbate peroxidase	APX	Sb01g038760
bZIP transcription factor TRAB1-like	TRAB1	Sb02g026570
Calcineurin B1	CaNB1	Sb01g028750
Desertification-related At2g46140-like	LEA type-2	Sb02g008820
Ethylen-insensitive 2-like	EIN2	Sb01g011020
Geranylgeranyl transferase Type-I Superfamily	GGTase 1	Sb03g006060
Histidine kinase 1	HK1	Sb01g010070
Indol-3-acetaldehyde oxidase	Indol-3-yl-AO	Sb01g005670	Sb02g005200
probable protein phosphatase 2C 6	PP2C-6	Sb03g026070
Probable protein phosphatase 2C 30	PP2C-30	Sb01g039890
Probable Protein phosphatase 2C 68	PP2C-68	Sb02g022090
Protein Phosphatase 2C ABI2	PP2C-ABI2	Sb09g030600
Drought stress related target genes
Alchol dehydrogenease 1	ADH-1	Sb01g008730	Sb01g008730.3	Sb01g008730	Sb01g008730.2	Sb01g008730	Sb05g009350	Sb05g009360
Allene oxide cyclase 4	AOC4	Sb01g031870
Aldehyde dehydrogenase family 3 member a22	ALDH3a22	Sb01g003880
NADP-dependent glyceraldehyde-3-phosphate dehydrogenase	NADP-GAPDH	Sb07g021630
aldehyde dehydrogenase Family 7 member a1	ALDH7a1	Sb02g025790
Probable monogalactosyl diacylglycerols	MGDG	Sb04g036240
Aldehyde dehydrogenase Family 3 member a6	ALDH3a6	Sb05g005470
Aldehyde dehydrogenase Family 3 member a6	ALDH3a6	Sb08g004840
Indol-3-acetaldehyde oxidase	Indol-3-yl-AO	Sb02g005200
Ribulose phosphate 3 epimerase	RPE/PPE	Sb01g045920
NADP-dependent glyceraldehyde-3-phosphate dehydrogenase	NADP-GAPDH	Sb07g021630
aldehyde dehydrogenase Family 7 member a1	ALDH7a1	Sb02g025790
Aldehyde dehydrogenase Family 3 member a14	ALDH3a14	Sb05g005470
Aldehyde dehydrogenase Family 3 member a14	ALDH3a14	Sb08g004840
Indol-3-acetaldehyde oxidase	Indol-3-yl-AO	Sb02g005200
Aldehyde dehydrogenease family 3 member a14 a22	ALDH3a22	Sb01g003880	Sb08g004840	Sb02g025790
desiccation-related At2g46140-like	LEA type-2	Sb02g008820
ethylene-insensitive 2-like	EIN2	Sb01g011020
glutathione transferase or s-transferase	GSTs	Sb02g003090	Sb01g005990	Sb02g022210
Beta-amylase-1	BAM1	Sb01g019850	Sb01g047500
peroxidases 1b and 3	POX1B/POX3	Sb04g004250	Sb10g027490
Delta-1-pyrroline-5-carboxylate synthase	P5CS1	Sb09g022290	Sb03g039820	Sb03g039820	Sb09g022290
Allene oxide cyclase 4	AOC4	Sb01g031870
Carotenoid cleavage dioxygenase	CCD	Sb01g047540
Ggalactinol-synthase 2-like	GOLS2	Sb01g037090
plasma membrane ATPase-like	P-ATPase	Sb01g048440
zanthine dehydrogenase	XDH	Sb01g031520
Heat stress related genes
heat shock 90	HSP90	Sb07g028940
Heat-shock 70	HSP70	Sb01g017050
Heat stress transcription factor B2a-like	HsfB2a	Sb06g025710
Galactinol synthase 2-like	GOLS2	Sb01g037090	Sb02g043450
Chtinase	Cas	Sb02g028770
Zeaxanthin epoxidase	ZEP	Sb06g018220
Cold stress related genes
cold regulated 413 inner membrane 1	COR413IM1	Sb09g028710
Low-temperrature induced protein	LTIP	Sb09g003060
Glutathione transferase or s-transferase	GSTs	Sb02g003090	Sb01g005990	Sb02g022210	Sb02g038130
Phosphoinsitide phospholipase C2-like protein	PLC2	Sb08g005200	Sb09g002320
Peroxidases 1b and 3	POX1B/POX3	Sb10g027490	Sb04g004250
Galactinol-synthase 2-like protein	GOLS2	Sb01g037090	Sb02g043450
3 -2 5-bisphosphate Nucleotidase-like protein	BPNT1	Sb08g005190	Sb08g005200
Probable monogalactosyl diacylglycerols	MGDGs	Sb04g036240
Acid endochitinase-like protein	AECLP	Sb03g030100
Allene oxide cyclase 4	AOC4	Sb01g031870.
Salt stress related genes
salt stress induced-hydrophobic peptide	SHP	Sb01g038670
salt tolerance protein	STO	Sb02g030690
Aldehyde dehydrogenase	ALDH	Sb02g025790	Sb05g005470	Sb08g004840
Delta-1-pyrroline-5-carboxylate synthase	P5CS1	Sb09g022290	Sb03g039820
Galactinol-synthase 2-like protein	GOLS2	Sb01g037090
Probable monogalactosyl diacylglycerols	MGDGs	Sb04g036240
Phosphoinsitide phospholipase C2-like protein	PLC2	Sb09g002320
Acid endochitinase-like protein	ECLP	Sb03g030100
Chtinase	Cas	Sb02g028770
Allene oxide cyclase 4	AOC4	Sb01g031870
Oxidative stress related genes
Glutathione transferase	GSTs	Sb01g005990	Sb02g022210	Sb02g038130	Sb10g022780	Sb02g003090	Sb02g022210	Sb10g022780
Peroxidase 1b and peroxidase 3	POX1B/POX3	Sb04g004250	Sb10g027490
Glycosyltransferases	GTFs	Sb01g037090
Galactinol-sucrose galactosyltransferase	RFS	Sb03g004540
Environmental Information Processing and Signal transduction related genes
Mitogen-activated kinase 5 isoform x2	MAPK5	Sb01g038750	Sb10g003810
Phosphoinositide phospholipase C 2-like	PLC2	Sb09g002320
Probable phosphatase 2C 9	PP2C-9	Sb09g022410
Molybdenum cofactor sulfurase activated Kinase 5 isoform x2	MCSUAK5	Sb10g026910
Phosphopantetheine adenylyltransferase	PPAT	Sb04g002790
Serine threonine-kinase	STK	Sb01g033570
Phosphoglycerate kinase	PGK	Sb04g004690
Phosphoribulokinase	PRK	Sb04g030950.
Carbohydrate metabolism related genes
Acid endochitinase-like	ECLP	Sb03g030100
Alcohol dehydrogenease 1	ADH1	Sb01g008730	Sb05g009350	Sb05g009360
Aldehyde dehydrogenase Family 3 member	ALDH3	Sb05g005470	Sb08g004840	Sb05g005470	Sb08g004840	Sb05g005470	Sb08g004840	Sb01g003880	Sb02g025790
Beta-amylase-1	BAM1	Sb01g019850	Sb01g047500
Cellulose synthase gene family	CSC	Sb03g034680	Sb08g017750	Sb03g034880
Chtinase	Cas	Sb02g028770
Galactinol synthase 2-like	GOLS2	Sb01g037090	Sb01g037090	Sb02g043450
Galactinol-sucrose galactosyltransferase	RFS	Sb03g004540
Glycerate dehydrogenase	GDH	Sb04g000320
NADP-dependent glyceraldehyde-3-phosphate dehydrogenase	GAPDH	Sb07g021630
Phosphoglycerate kinase	PGK	Sb04g004690
Phosphoinositide phospholipase C 2-like	PLC2	Sb09g002320
RuBisCO	RuBisCO	Sb05g027870
Ribulose phosphate 3 epimerase	RPE/PPE	Sb01g045920
Sucrose synthase	SUS	Sb01g033060	Sb10g006330
UDP-glucose 4 epimerases	UGE	Sb01g035380
Energy and carbon metabolism related genes
Plasma membrane ATPase-like	P-ATPase	Sb01g048440	Sb06g031240	Sb07g007610	Sb10g025470
3,2, 5-bisphosphate nucleotidase-like	BPNT1	Sb08g005190	Sb08g005200
Aaspartate amino transferase	AST	Sb03g035220
NADH dehydrogenease [ubiquinone] Iron-sulfur protein	NDUFS	Sb02g037780
Phosphoglycerate kinase	PGK	Sb04g004690
Phosphoribulokinase	PRK	Sb04g030950
RuBisCO	RuBisCO	Sb05g027870
Ribulose phosphate 3 epimerase	RPE/PPE	Sb01g045920
RNA polymerase II C-terminal domain	Pol2CTD	Sb03g040355
Amino acid metabolism related genes
Aldehyde dehydrogenase family 3 members	ALDH3	Sb01g003880	Sb05g005470	Sb08g004840
Alcohol dehydrogenease 1	ADH1	Sb01g008730	Sb05g009350	Sb05g009360
Glutathione transferase	GSTs	Sb02g003090	Sb01g005990	Sb02g022210	Sb02g038130	Sb03g045860	Sb10g022780
Delta-1-pyrroline-5-carboxylate synthase	P5CS1	Sb03g039820	Sb09g022290	Sb09g022290
Glycerate dehydrogenase	GDH	Sb04g000320
Anosylhomocysteinase	AHCY	Sb05g014470
Arginine decarboxylase-like	ADC	Sb10g002070
Aspartate amino transferase	AST	Sb03g035220
Molybdenum co-factor sulfurasectivated Kinase 5 isoform x2	MCSU	Sb10g026910
NADP-dependent glyceraldehyde-3-phosphate dehydrogenase	GAPDH	Sb07g021630
Probable glutathionine peroxidase 2	GPX2	Sb0010s007790
RNA polymerase II C-terminal domain	Pol2CTD	Sb03g040355
2-Cys peroxiredoxin BAS1	BAS1	Sb04g021990
Biosynthesis of secondary metabolites related genes
Peroxidase	PO	Sb05g001000	Sb04g004250	Sb10g027490
Delta-1-pyrroline-5 carboxylate synthase	P5CS1	Sb09g022290	Sb03g039820
Xanthine dehydrogenease	XDH	Sb01g031520
Delta-1-pyrroline-5-carboxylate synthase	P5CS1	Sb03g039820
Aspartate amino transferase	AST	Sb03g035220
2-Cys peroxiredoxin BAS1	BAS1	Sb04g021990
Other plant hormone related genes
Alcohol dehydrogenease 1	ADH1	Sb01g008730	Sb05g009350	Sb05g009360
Allene oxide Cyclase 4	AOC4	Sb01g031870
Aldehyde dehydrogenase family3 member a22	ALDH3a22	Sb01g003880
Zeaxanthin epoxidase	ZEP	Sb06g018220
Carotenoid cleavage dioxygenase	CCD	Sb01g047540
Nine-cis-epoxycarotenoid dioxygenase	NCED	Sb01g047540
ABA8 hydroxylase	ABA8'OH	Sb07g022990
Zerumbone synthase	ZSD1	Sb01g003880
Aspartate amino transferase	AST	Sb03g035220
Anosylhomocysteinase	AHCY	Sb05g014470
Malate mitochondria-like	MDH	Sb03g029570
Aspartate amino transferase	AST	Sb03g035220
Aldehyde dehydrogenase Family 3 member a15	ALDH3a15	Sb05g005470	Sb08g004840
indol-3-acetaldehyde oxidase	AAO1	Sb02g005200
NADP-dependent glyceraldehyde-3-phosphate dehydrogenase	GAPDH	Sb07g021630
Aldehyde dehydrogenase Family 7	ALDH7	Sb02g025790
Aldehyde dehydrogenase Family 3 member a22	ALDH3a22	Sb05g005470
Aldehyde dehydrogenase Family 3 member a1	ALDH3a1	Sb08g004840

## Sheet: Description of various stress r
Description of stress related pathways genes	No of TF/Regulatory genes	# of target genes	Entries
Drought related transcription factor supper family (DRTFSF)	17	19	Sb07g026900	Sb01g028870	Sb01g039740	Sb03g006450	Sb06g008585	Sb10g023010	Sb05g021820	Sb03g032530	Sb05g019540	Sb02g026570	Sb03g032290	Sb01g011020	Sb04g006970	Sb02g025080	Sb04g006970	Sb01g030570	Sb01g049020	Sb03g029920	Sb03g006450	Sb08g004840	Sb01g029220	Sb02g022280
ABA biosynthesis and Signaling pathways (ABA-BSP)	9	42	Sb06g018220	Sb01g047540	Sb01g003880	Sb07g022990	Sb10g026910	Sb07g022990	Sb01g038150	Sb03g038600	Sb04g008040	Sb04g009280	Sb09g006700	Sb09g023180	Sb10g022200	Sb02g022090	Sb03g026070	Sb03g029890	Sb03g032740	Sb03g039630	Sb06g001720	Sb09g026860	Sb09g029080	Sb09g030600	Sb01g033570	Sb02g039640	Sb04g022410	Sb06g033990	Sb08g019700	Sb09g021410	Sb02g026570	Sb02g043620	Sb03g037740	Sb03g040510	Sb03g040970	Sb06g026410	Sb08g003760	Sb09g021580	Sb09g023920	Sb10g007090
Drought-inducible regulatory protein related genes (DIRPTGs)	13	14	Sb07g024160	Sb01g038760	Sb02g026570	Sb01g028750	Sb02g008820	Sb01g011020	Sb03g006060	Sb01g010070	Sb01g005670	Sb02g005200	Sb03g026070	Sb01g039890	Sb02g022090	Sb09g030600
Drought stress related target genes (DSRTGs)	20	43	Sb01g008730	Sb01g008730.3	Sb01g008730	Sb01g008730.2	Sb01g008730	Sb05g009350	Sb05g009360	Sb01g031870	Sb01g003880	Sb07g021630	Sb02g025790	Sb04g036240	Sb05g005470	Sb08g004840	Sb02g005200	Sb01g045920	Sb07g021630	Sb02g025790	Sb05g005470	Sb08g004840	Sb02g005200	Sb01g019850	Sb01g047500	Sb04g004250	Sb10g027490	Sb09g022290	Sb03g039820	Sb03g039820	Sb09g022290	Sb01g031870	Sb01g047540	Sb01g037090	Sb01g048440	Sb01g031520	Sb01g003880	Sb08g004840	Sb02g025790	Sb02g008820	Sb01g011020	Sb02g003090	Sb01g005990	Sb02g022210
Heat stress related genes (HSRTGs)	6	7	Sb07g028940	Sb01g017050	Sb06g025710	Sb01g037090	Sb02g028770	Sb06g018220	Sb02g043450
Cold stress related genes (CSRGs)	10	17	Sb09g028710	Sb09g003060	Sb02g003090	Sb08g005200	Sb10g027490	Sb01g037090	Sb08g005190	Sb04g036240	Sb03g030100	Sb01g031870	Sb01g005990	Sb09g002320	Sb04g004250	Sb02g043450	Sb08g005200	Sb02g022210	Sb02g038130
Salt stress related genes (SSRGs)	10	13	Sb01g038670	Sb02g030690	Sb02g025790	Sb09g022290	Sb01g037090	Sb04g036240	Sb09g002320	Sb03g030100	Sb02g028770	Sb01g031870	Sb05g005470	Sb08g004840	Sb03g039820
Oxidative stress related genes (OSRGs)	4	11	Sb01g005990	Sb02g022210	Sb02g038130	Sb10g022780	Sb02g003090	Sb02g022210	Sb10g022780	Sb04g004250	Sb10g027490	Sb01g037090	Sb03g004540
Environmental Information Processing and Signal transduction related genes EIPSTRGs)	8	9	Sb01g038750	Sb10g003810	Sb09g002320	Sb09g022410	Sb10g026910	Sb04g002790	Sb01g033570	Sb04g004690	Sb04g030950
Carbohydrate metabolism related genes (CMRGs)	16	31	Sb03g030100	Sb01g008730	Sb05g005470	Sb01g019850	Sb03g034680	Sb02g028770	Sb01g037090	Sb03g004540	Sb04g000320	Sb07g02130	Sb04g004690	Sb09g002320	Sb05g027870	Sb01g045920	Sb01g033060	Sb01g035380	Sb05g009350	Sb05g009360	Sb08g004840	Sb05g005470	Sb08g004840	Sb05g005470	Sb08g004840	Sb01g003880	Sb02g025790	Sb01g047500	Sb08g017750	Sb01g037090	Sb02g043450	Sb03g034880	Sb10g006330
Energy and carbon metabolism related genes (ECMRGs)	9	13	Sb01g048440	Sb06g031240	Sb07g007610	Sb10g025470	Sb08g005190	Sb08g005200	Sb03g035220	Sb02g037780	Sb04g004690	Sb04g030950	Sb05g027870	Sb01g045920	Sb03g040355
Amino acid metabolism related genes (AAMRGs)	13	24	Sb01g003880	Sb01g008730	Sb02g003090	Sb03g039820	Sb04g000320	Sb05g014470	Sb10g002070	Sb03g035220	Sb10g026910	Sb07g021630	Sb0010s007790	Sb03g040355	Sb04g021990	Sb05g005470	Sb08g004840	Sb05g009350	Sb05g009360	Sb01g005990	Sb02g022210	Sb02g038130	Sb03g045860	Sb10g022780	Sb09g022290	Sb09g022290
Biosynthesis of secondary metabolites related genes (BSMRGs)	6	9	Sb05g001000	Sb04g004250	Sb10g027490	Sb09g022290	Sb03g039820	Sb01g031520	Sb03g039820	Sb03g035220	Sb04g021990
Other plant hormone related genes (OPHRGs)	16	19	Sb01g008730	Sb05g009350	Sb05g009360	Sb01g031870	Sb01g003880	Sb06g018220	Sb01g047540	Sb01g047540	Sb07g022990	Sb01g003880	Sb03g035220	Sb05g014470	Sb03g029570	Sb03g035220	Sb05g005470	Sb02g005200	Sb07g021630	Sb02g025790	Sb05g005470	Sb08g004840	Sb08g004840

## Sheet: Total pathway involved 133 non-
Table S1
Category of genes	133 non-redundant genes
DRTFSF	Sb07g026900
DRTFSF	Sb01g028870
DRTFSF	Sb01g039740
DRTFSF	Sb03g006450
DRTFSF	Sb06g008585
DRTFSF	Sb10g023010
DRTFSF	Sb05g021820
DRTFSF	Sb03g032530
DRTFSF	Sb05g019540
DRTFSF	Sb02g026570
DRTFSF	Sb03g032290
DRTFSF	Sb01g011020
DRTFSF	Sb04g006970
DRTFSF	Sb02g025080
DRTFSF	Sb04g006970
DRTFSF	Sb01g030570
DRTFSF	Sb01g049020
DRTFSF	Sb03g029920
DRTFSF	Sb03g006450
DRTFSF	Sb01g029220
DRTFSF	Sb02g022280
ABA-BSP	Sb06g018220
ABA-BSP	Sb01g047540
ABA-BSP	Sb01g003880
ABA-BSP	Sb07g022990
ABA-BSP	Sb10g026910
ABA-BSP	Sb07g022990
ABA-BSP	Sb01g038150
ABA-BSP	Sb03g038600
ABA-BSP	Sb04g008040
ABA-BSP	Sb04g009280
ABA-BSP	Sb09g006700
ABA-BSP	Sb09g023180
ABA-BSP	Sb10g022200
ABA-BSP	Sb02g022090
ABA-BSP	Sb03g026070
ABA-BSP	Sb03g029890
ABA-BSP	Sb03g032740
ABA-BSP	Sb03g039630
ABA-BSP	Sb06g001720
ABA-BSP	Sb09g026860
ABA-BSP	Sb09g029080
ABA-BSP	Sb09g030600
ABA-BSP	Sb01g033570
ABA-BSP	Sb02g039640
ABA-BSP	Sb04g022410
ABA-BSP	Sb06g033990
ABA-BSP	Sb08g019700
ABA-BSP	Sb09g021410
ABA-BSP	Sb02g026570
ABA-BSP	Sb02g043620
ABA-BSP	Sb03g037740
ABA-BSP	Sb03g040510
ABA-BSP	Sb03g040970
ABA-BSP	Sb06g026410
ABA-BSP	Sb08g003760
ABA-BSP	Sb09g021580
ABA-BSP	Sb09g023920
ABA-BSP	Sb10g007090
DIRPRG	Sb07g024160
DIRPRG	Sb01g038760
DIRPRG	Sb02g026570
DIRPRG	Sb01g028750
DIRPRG	Sb02g008820
DIRPRG	Sb01g011020
DIRPRG	Sb03g006060
DIRPRG	Sb01g010070
DIRPRG	Sb01g005670
DIRPRG	Sb02g005200
DIRPRG	Sb03g026070
DIRPRG	Sb01g039890
DIRPRG	Sb02g022090
DIRPRG	Sb09g030600
DSRTG	Sb01g008730
DSRTG	Sb05g009350
DSRTG	Sb05g009360
DSRTG	Sb01g031870
DSRTG	Sb01g003880
DSRTG	Sb07g021630
DSRTG	Sb02g025790
DSRTG	Sb04g036240
DSRTG	Sb05g005470
DSRTG	Sb08g004840
DSRTG	Sb02g005200
DSRTG	Sb01g045920
DSRTG	Sb07g021630
DSRTG	Sb02g025790
DSRTG	Sb05g005470
DSRTG	Sb08g004840
DSRTG	Sb02g005200
DSRTG	Sb01g019850
DSRTG	Sb01g047500
DSRTG	Sb04g004250
DSRTG	Sb10g027490
DSRTG	Sb09g022290
DSRTG	Sb03g039820
DSRTG	Sb03g039820
DSRTG	Sb09g022290
DSRTG	Sb01g031870
DSRTG	Sb01g047540
DSRTG	Sb01g037090
DSRTG	Sb01g048440
DSRTG	Sb01g031520
DSRTG	Sb01g003880
DSRTG	Sb08g004840
DSRTG	Sb02g025790
DSRTG	Sb02g008820
DSRTG	Sb01g011020
DSRTG	Sb02g003090
DSRTG	Sb01g005990
DSRTG	Sb02g022210
HSRG	Sb07g028940
HSRG	Sb01g017050
HSRG	Sb06g025710
HSRG	Sb01g037090
HSRG	Sb02g028770
HSRG	Sb06g018220
HSRG	Sb02g043450
CSRG	Sb09g028710
CSRG	Sb09g003060
CSRG	Sb02g003090
CSRG	Sb08g005200
CSRG	Sb10g027490
CSRG	Sb01g037090
CSRG	Sb08g005190
CSRG	Sb04g036240
CSRG	Sb03g030100
CSRG	Sb01g031870
CSRG	Sb01g005990
CSRG	Sb09g002320
CSRG	Sb04g004250
CSRG	Sb02g043450
CSRG	Sb08g005200
CSRG	Sb02g022210
CSRG	Sb02g038130
SSRG	Sb01g038670
SSRG	Sb02g030690
SSRG	Sb02g025790
SSRG	Sb09g022290
SSRG	Sb01g037090
SSRG	Sb04g036240
SSRG	Sb09g002320
SSRG	Sb03g030100
SSRG	Sb02g028770
SSRG	Sb01g031870
SSRG	Sb05g005470
SSRG	Sb08g004840
SSRG	Sb03g039820
OSRG	Sb01g005990
OSRG	Sb02g022210
OSRG	Sb02g038130
OSRG	Sb10g022780
OSRG	Sb02g003090
OSRG	Sb02g022210
OSRG	Sb10g022780
OSRG	Sb04g004250
OSRG	Sb10g027490
OSRG	Sb01g037090
OSRG	Sb03g004540
EIPSTRG	Sb01g038750
EIPSTRG	Sb10g003810
EIPSTRG	Sb09g002320
EIPSTRG	Sb09g022410
EIPSTRG	Sb10g026910
EIPSTRG	Sb04g002790
EIPSTRG	Sb01g033570
EIPSTRG	Sb04g004690
EIPSTRG	Sb04g030950
CMRG	Sb03g030100
CMRG	Sb01g008730
CMRG	Sb05g005470
CMRG	Sb01g019850
CMRG	Sb03g034680
CMRG	Sb02g028770
CMRG	Sb01g037090
CMRG	Sb03g004540
CMRG	Sb04g000320
CMRG	Sb07g002130
CMRG	Sb04g004690
CMRG	Sb09g002320
CMRG	Sb05g027870
CMRG	Sb01g045920
CMRG	Sb01g033060
CMRG	Sb01g035380
CMRG	Sb05g009350
CMRG	Sb05g009360
CMRG	Sb08g004840
CMRG	Sb05g005470
CMRG	Sb08g004840
CMRG	Sb05g005470
CMRG	Sb08g004840
CMRG	Sb01g003880
CMRG	Sb02g025790
CMRG	Sb01g047500
CMRG	Sb08g017750
CMRG	Sb01g037090
CMRG	Sb02g043450
CMRG	Sb03g034880
CMRG	Sb10g006330
ECMRG	Sb01g048440
ECMRG	Sb06g031240
ECMRG	Sb07g007610
ECMRG	Sb10g025470
ECMRG	Sb08g005190
ECMRG	Sb08g005200
ECMRG	Sb03g035220
ECMRG	Sb02g037780
ECMRG	Sb04g004690
ECMRG	Sb04g030950
ECMRG	Sb05g027870
ECMRG	Sb01g045920
ECMRG	Sb03g040355
AAMRG	Sb01g003880
AAMRG	Sb01g008730
AAMRG	Sb02g003090
AAMRG	Sb03g039820
AAMRG	Sb04g000320
AAMRG	Sb05g014470
AAMRG	Sb10g002070
AAMRG	Sb03g035220
AAMRG	Sb10g026910
AAMRG	Sb07g021630
AAMRG	Sb0010s007790
AAMRG	Sb03g040355
AAMRG	Sb04g021990
AAMRG	Sb05g005470
AAMRG	Sb08g004840
AAMRG	Sb05g009350
AAMRG	Sb05g009360
AAMRG	Sb01g005990
AAMRG	Sb02g022210
AAMRG	Sb02g038130
AAMRG	Sb03g045860
AAMRG	Sb10g022780
AAMRG	Sb09g022290
AAMRG	Sb09g022290
BSMRG	Sb05g001000
BSMRG	Sb04g004250
BSMRG	Sb10g027490
BSMRG	Sb09g022290
BSMRG	Sb03g039820
BSMRG	Sb01g031520
BSMRG	Sb03g039820
BSMRG	Sb03g035220
BSMRG	Sb04g021990
OPHRG	Sb01g008730
OPHRG	Sb05g009350
OPHRG	Sb05g009360
OPHRG	Sb01g031870
OPHRG	Sb01g003880
OPHRG	Sb06g018220
OPHRG	Sb01g047540
OPHRG	Sb01g047540
OPHRG	Sb07g022990
OPHRG	Sb01g003880
OPHRG	Sb03g035220
OPHRG	Sb05g014470
OPHRG	Sb03g029570
OPHRG	Sb03g035220
OPHRG	Sb05g005470
OPHRG	Sb02g005200
OPHRG	Sb07g021630
OPHRG	Sb02g025790
OPHRG	Sb05g005470
OPHRG	Sb08g004840
TBC1	Sb07g026900
Myb	Sb01g028870
TPA	Sb01g039740
DIVARICATA	Sb03g006450
DIVARICATA	Sb06g008585
MBF	Sb10g023010
Myb	Sb05g021820
Myb	Sb03g032530
ARF	Sb05g019540
bZIP	Sb02g026570
AP1	Sb03g032290
EI2	Sb01g011020
ERTF	Sb04g006970
AP2	Sb02g025080
AP2/ERF	Sb04g006970
MADS-box	Sb01g030570
MADS	Sb01g049020
WRKY	Sb03g029920
DIVARICATA	Sb03g006450
UNE10	Sb01g029220
WRKY	Sb02g022280
ZEP	Sb06g018220
NCED	Sb01g047540
XDH	Sb01g003880
ABA8'OH	Sb07g022990
MCSU	Sb10g026910
CYP707A1	Sb07g022990
PYR/PYL/RCAR	Sb01g028330
PYR/PYL/RCAR	Sb01g038150
PYR/PYL/RCAR	Sb03g038600
PYR/PYL/RCAR	Sb04g008040
PYR/PYL/RCAR	Sb04g009280
PYR/PYL/RCAR	Sb09g006700
PYR/PYL/RCAR	Sb09g023180
PYR/PYL/RCAR	Sb10g022200
PP2C	Sb01g039890
PP2C	Sb02g022090
PP2C	Sb03g026070
PP2C	Sb03g029890
PP2C	Sb03g032740
PP2C	Sb03g039630
PP2C	Sb06g001720
PP2C	Sb09g026860
PP2C	Sb09g029080
PP2C	Sb09g030600
SnRK2	Sb01g007120
SnRK3	Sb01g033570
SnRK4	Sb02g039640
SnRK5	Sb04g022410
SnRK6	Sb06g033990
SnRK7	Sb08g019700
SnRK8	Sb09g021410
AREB/ABF	Sb01g036810
AREB/ABF	Sb02g026570
AREB/ABF	Sb02g043620
AREB/ABF	Sb03g037740
AREB/ABF	Sb03g040510
AREB/ABF	Sb03g040970
AREB/ABF	Sb06g026410
AREB/ABF	Sb08g003760
AREB/ABF	Sb09g021580
AREB/ABF	Sb09g023920
AREB/ABF	Sb10g007090
LEA14a	Sb07g024160
APX	Sb01g038760
TRAB1	Sb02g026570
CaNB1	Sb01g028750
LEA2	Sb02g008820
EIN2	Sb01g011020
GGTase 1	Sb03g006060
HK1	Sb01g010070
Indol-3-yl-AO	Sb01g005670
Indol-3-yl-AO	Sb02g005200
PP2C-6	Sb03g026070
PP2C-30	Sb01g039890
PP2C-68	Sb02g022090
PP2C-ABI2	Sb09g030600
ADH	Sb01g008730
AOC4	Sb01g008730
ALDH3a22	Sb05g009350
NADP-GAPDH	Sb05g009360
ALDH7a1	Sb02g025790
MGDG	Sb04g036240
ALDH3a6	Sb05g005470
ALDH3a6	Sb08g004840
Indol-3-yl-AO	Sb02g005200
RPE/PPE	Sb01g045920
NADP-GAPDH	Sb07g021630
ALDH7a1	Sb02g025790
ALDH3a14	Sb05g005470
ALDH3a14	Sb08g004840
Indol-3-yl-AO	Sb02g005200
ALDH3a22	Sb01g003880
ALDH3a22	Sb08g004840
ALDH3a22	Sb02g025790
LEA type-2	Sb02g008820
EIN2	Sb01g011020
GSTs	Sb02g003090
GSTs	Sb01g005990
GSTs	Sb02g022210
BAM1	Sb01g019850
BAM1	Sb01g047500
POX1B/POX3	Sb04g004250
POX1B/POX3	Sb10g027490
P5CS1	Sb09g022290
P5CS1	Sb03g039820
P5CS1	Sb03g039820
AOC4	Sb01g031870
CCD	Sb01g047540
GOLS2	Sb01g037090
P-ATPase	Sb01g048440
XDH	Sb01g031520
HSP90	Sb07g028940
HSP70	Sb01g017050
HsfB2a	Sb06g025710
GOLS2	Sb01g037090
GOLS2	Sb02g043450
Cas	Sb02g028770
ZEP	Sb06g018220
COR413IM1	Sb09g028710
LTIP	Sb09g003060
GSTs	Sb02g003090
GSTs	Sb01g005990
GSTs	Sb02g022210
GSTs	Sb02g038130
PLC2	Sb08g005200
PLC2	Sb09g002320
POX1B/POX3	Sb10g027490
POX1B/POX	Sb04g004250
GOLS2	Sb01g037090
GOLS2	Sb02g043450
BPNT1	Sb08g005190
BPNT1	Sb08g005200
MGDGs	Sb04g036240
AECLP	Sb03g030100
AOC4	Sb01g031870
SHP	Sb01g038670
STO	Sb02g030690
ALDH	Sb02g025790
ALDH	Sb05g005470
ALDH	Sb08g004840
P5CS1	Sb09g022290
P5CS1	Sb03g039820
GOLS2	Sb01g037090
MGDGs	Sb04g036240
PLC2	Sb09g002320
ECLP	Sb03g030100
Cas	Sb02g028770
AOC4	Sb01g031870
GSTs	Sb01g005990
GSTs	Sb02g022210
GSTs	Sb02g038130
GSTs	Sb10g022780
GSTs	Sb02g003090
GSTs	Sb02g022210
GSTs	Sb10g022780
POX1B/POX3	Sb04g004250
POX1B/POX3	Sb10g027490
GTFs	Sb01g037090
RFS	Sb03g004540
MAPK5	Sb01g038750
MAPK5	Sb10g003810
PLC2	Sb09g002320
PP2C-9	Sb09g022410
MCSUAK5	Sb10g026910
PPAT	Sb04g002790
STK	Sb01g033570
PGK	Sb04g004690
PRK	Sb04g030950
ECLP	Sb03g030100
ADH1	Sb01g008730
ADH1	Sb05g009350
ADH1	Sb05g009360
ALDH3	Sb05g005470
ALDH3	Sb08g004840
ALDH3	Sb05g005470
ALDH3	Sb08g004840
ALDH3	Sb05g005470
ALDH3	Sb08g004840
ALDH3	Sb01g003880
ALDH3	Sb02g025790
BAM1	Sb01g019850
BAM1	Sb01g047500
CSC	Sb03g034680
CSC	Sb08g017750
Cas	Sb02g028770
GOLS2	Sb01g037090
GOLS2	Sb01g037090
RFS	Sb03g004540
GDH	Sb04g000320
GAPDH	Sb07g021630
PGK	Sb04g004690
PLC2	Sb09g002320
RuBisCO	Sb05g027870
RPE/PPE	Sb01g045920
SUS	Sb01g033060
SUS	Sb10g006330
UGE	Sb01g035380
P-ATPase	Sb01g048440
P-ATPase	Sb06g031240
P-ATPase	Sb07g007610
P-ATPase	Sb10g025470
BPNT1	Sb08g005190
BPNT1	Sb08g005200
AST	Sb03g035220
NDUFS	Sb02g037780
PGK	Sb04g004690
PRK	Sb04g030950
RuBisCO	Sb05g027870
RPE/PPE	Sb01g045920
Pol2CTD	Sb03g040355
ALDH3	Sb01g003880
ALDH3	Sb05g005470
ALDH3	Sb08g004840
ADH1	Sb01g008730
ADH1	Sb05g009350
ADH1	Sb05g009360
GSTs	Sb02g003090
GSTs	Sb01g005990
GSTs	Sb02g022210
GSTs	Sb02g038130
GSTs	Sb03g045860
GSTs	Sb10g022780
P5CS1	Sb03g039820
P5CS1	Sb09g022290
P5CS1	Sb09g022290
GDH	Sb04g000320
AHCY	Sb05g014470
ADC	Sb10g002070
AST	Sb03g035220
MCSU	Sb10g026910
GAPDH	Sb07g021630
GPX2	Sb0010s007790
Pol2CTD	Sb03g040355
BAS1	Sb04g021990
PO	Sb05g001000
PO	Sb04g004250
PO	Sb10g027490
P5CS1	Sb09g022290
P5CS1	Sb03g039820
XDH	Sb01g031520
P5CS1	Sb03g039820
AST	Sb03g035220
BAS1	Sb04g021990
ADH1	Sb01g008730
AOC4	Sb01g031870
ALDH3a22	Sb01g003880
ZEP	Sb06g018220
CCD	Sb01g047540
NCED	Sb01g047540
ABA8'OH	Sb07g022990
ZSD1	Sb01g003880
AST	Sb03g035220
AHCY	Sb05g014470
MDH	Sb03g029570
AST	Sb03g035220
ALDH3a15	Sb05g005470
ALDH3a15	Sb08g004840
AAO1	Sb02g005200
GAPDH	Sb07g021630
ALDH7	Sb02g025790
ALDH3a22	Sb05g005470
ALDH3a1	Sb08g004840

## Sheet: Drought related transcription f
Drought related transcription factor (TF) supper family
Transcription factor description	Protein/TF Name	Target genes
TBC1 domain family member 5 homologous	TBC1	Sb07g026900
TPA:Myb DNA-binding domain superfamily	Myb	Sb01g028870
TPA:RING zinc finger domain superfamily	TPA	Sb01g039740
Transcription factor DIVARICATA	DIVARICATA	Sb03g006450	Sb06g008585
Multi-bridging factor 1C (MBF-1C)	MBF	Sb10g023010
Myb-related 306	Myb	Sb05g021820
Single myb histon 4	Myb	Sb03g032530
Auxin response factor	ARF	Sb05g019540
bZIP transcription faction TRAB1-like	bZIP	Sb02g026570
AP1 complex subunit mu-2	AP1	Sb03g032290
Ethylen-insensitive 2-like	EI2	Sb01g011020
Ethylene-responsive transcription factor	ERTF	Sb04g006970
AP2-like ethylene-responsive transcription factor	AP2	Sb02g025080
Ethylene-responsive transcription factor	AP2/ERF	Sb04g006970
MADS-box transcription factor 50 isoform	MADS-box	Sb01g030570
MADS Transcription factor, partial	MADS	Sb01g049020
Probable WRKY transcription factor 53	WRKY	Sb03g029920
Aldehyde dehydrogenease Family 3 Family 3 member a14 a22	ALDH	Sb08g004840
Transcription factor DIVARICATA	DIVARICATA	Sb03g006450
Transcription factorUNE10	UNE10	Sb01g029220
WRKY 74 superfamily of TFs having WRKY and zinc finger domains	WRKY	Sb02g022280

## Sheet: ABA biosynthesis and Signaling 
ABA biosynthesis and Signalling pathway genes
Transcription factor description	Protein/TF Name	Target genes
zeaxanthin epoxidase	ZEP	Sb06g018220
epoxycarotenoid dioxygenase	NCED	Sb01g047540
Xanthoxin dehydrogenase	XDH	Sb01g003880
ABA8 hydroxylase	ABA8'OH	Sb07g022990
Molybdenum cofactor sulfurase activated Kinase 5 isoform x2	MCSU	Sb10g026910
CYP707A1	CYP707A1	Sb07g022990
ABA receptors	PYR/PYL/RCAR	Sb01g028330	Sb01g038150	Sb03g038600	Sb04g008040	Sb04g009280	Sb09g006700	Sb09g023180	Sb10g022200
protein phosphatases	PP2C	Sb01g039890	Sb02g022090	Sb03g026070	Sb03g029890	Sb03g032740	Sb03g039630	Sb06g001720	Sb09g026860	Sb09g029080	Sb09g030600
protein kinases	SnRK2	Sb01g007120	Sb01g033570	Sb02g039640	Sb04g022410	Sb06g033990	Sb08g019700	Sb09g021410
AREB/ABF-channels	AREB/ABF	Sb01g036810	Sb02g026570	Sb02g043620	Sb03g037740	Sb03g040510	Sb03g040970	Sb06g026410	Sb08g003760	Sb09g021580	Sb09g023920	Sb10g007090

## Sheet: Drought- inducible regulatory p
Drought-and other abiotic stress inducible regulatory protein related genes
Protein/Transcription factor description	Protein/TF Name	Target genes
Late embyogenesis abandant 14-a	LEA14a	Sb07g024160
Ascorbate peroxidase	APX	Sb01g038760
bZIP transcription faction TRAB1-like	TRAB1	Sb02g026570
Calcineurin B1	CaNB1	Sb01g028750
Desertification-related At2g46140-like	LEA type-2	Sb02g008820
Ethylen-insensitive 2-like	EIN2	Sb01g011020
Geranylgeranyl transferase Type-I Superfamily	GGTase 1	Sb03g006060
Histidine kinase 1	HK1	Sb01g010070
Indol-3-acetaldehyde oxidase	Indol-3-yl-AO	Sb01g005670	Sb02g005200
probable protein phosphatase 2C 6	PP2C-6	Sb03g026070
Probable protein phosphatase 2C 30	PP2C-30	Sb01g039890
Probable Protein phosphatase 2C 68	PP2C-68	Sb02g022090
Protein Phosphatase 2C ABI2	PP2C-ABI2	Sb09g030600

## Sheet: Drought stress related target g
Drought stress related target genes
Protein/Transcription factor description	Protein/TF Name	Target genes
Alchol dehydrogenease 1	ADH-1	Sb01g008730	Sb01g008730.3	Sb01g008730	Sb01g008730.2	Sb01g008730	Sb05g009350	Sb05g009360
Allene oxide cyclase 4	AOC4	Sb01g031870
Aldehyde dehydrogenase family 3 member a22	ALDH3a22	Sb01g003880
NADP-dependent glyceraldehyde-3-phosphate dehydrogenase	NADP-GAPDH	Sb07g021630
aldehyde dehydrogenase Family 7 member a1	ALDH7a1	Sb02g025790
Probable monogalactosyl diacylglycerols	MGDG	Sb04g036240
Aldehyde dehydrogenase Family 3 member a6	ALDH3a6	Sb05g005470
Aldehyde dehydrogenase Family 3 member a6	ALDH3a6	Sb08g004840
Indol-3-acetaldehyde oxidase	Indol-3-yl-AO	Sb02g005200
Ribulose phosphate 3 epimerase	RPE/PPE	Sb01g045920
NADP-dependent glyceraldehyde-3-phosphate dehydrogenase	NADP-GAPDH	Sb07g021630
aldehyde dehydrogenase Family 7 member a1	ALDH7a1	Sb02g025790
Aldehyde dehydrogenase Family 3 member a14	ALDH3a14	Sb05g005470
Aldehyde dehydrogenase Family 3 member a14	ALDH3a14	Sb08g004840
Indol-3-acetaldehyde oxidase	Indol-3-yl-AO	Sb02g005200
Aldehyde dehydrogenease Family 3 Family 3 member a14 a22	ALDH3a22	Sb01g003880	Sb08g004840	Sb02g025790
desiccation-related At2g46140-like	LEA type-2	Sb02g008820
ethylene-insensitive 2-like	EIN2	Sb01g011020
glutathione transferase or s-transferase	GSTs	Sb02g003090	Sb01g005990	Sb02g022210
Beta-amylase-1	BAM1	Sb01g019850	Sb01g047500
peroxidases 1b and 3	POX1B/POX3	Sb04g004250	Sb10g027490
Delta-1-pyrroline-5-carboxylate synthase	P5CS1	Sb09g022290	Sb03g039820	Sb03g039820	Sb09g022290
Allene oxide cyclase 4	AOC4	Sb01g031870
Carotenoid cleavage dioxygenase	CCD	Sb01g047540
Ggalactinol-synthase 2-like	GOLS2	Sb01g037090
plasma membrane ATPase-like	P-ATPase	Sb01g048440
zanthine dehydrogenase	XDH	Sb01g031520

## Sheet: Heat stress related genes
Heat stress related genes
Protein/Transcription factor description	Protein/TF Name	Target genes
heat shock 90	HSP90	Sb07g028940
Heat-shock 70	HSP70	Sb01g017050
Heat stress transcription factor B2a-like	HsfB2a	Sb06g025710
Galactinol synthase 2-like	GOLS2	Sb01g037090	Sb02g043450
Chtinase	Cas	Sb02g028770
Zeaxanthin epoxidase	ZEP	Sb06g018220

## Sheet: Cold stress related genes
Cold stress related genes
Protein/Transcription factor description	Protein/TF Name	Target genes
cold regulated 413 inner membrane 1	COR413IM1	Sb09g028710
Low-temperrature induced protein	LTIP	Sb09g003060
Glutathione transferase or s-transferase	GSTs	Sb02g003090	Sb01g005990	Sb02g022210	Sb02g038130
Phosphoinsitide phospholipase C2-like protein	PLC2	Sb08g005200	Sb09g002320
Peroxidases 1b and 3	POX1B/POX3	Sb10g027490	Sb04g004250
Galactinol-synthase 2-like protein	GOLS2	Sb01g037090	Sb02g043450
3 -2 5-bisphosphate Nucleotidase-like protein	BPNT1	Sb08g005190	Sb08g005200
Probable monogalactosyl diacylglycerols	MGDGs	Sb04g036240
Acid endochitinase-like protein	AECLP	Sb03g030100
Allene oxide cyclase 4	AOC4	Sb01g031870.

[truncated: 8 more sheets: Salt stress related genes, Oxidative stress related genes, Environmental Information Proce, Carbohydrate metabolism related, Carbon and energy metabolism re, Amino acid metabolism related g, Biosynthesis of secondary metab, Other plant hormone related gen]
