# Supplementary material for: Pathways and Network Based Analysis of Candidate Genes to Reveal Cross-Talk and Specificity in the Sorghum (Sorghum bicolor (L.) Moench) Responses to Drought and It's Co-occurring Stresses
Source: Front Genet. 2018 Nov 20;9:557. doi: 10.3389/fgene.2018.00557 (PMC6255970; doi:10.3389/fgene.2018.00557)
Supplement: Table S2 — List of GO-accessions and associated GO-terms enriched for drought and related stresses response genes. [file Table_2.XLSX]

## Sheet: Total GO-terms including non-en
Table S2. The GO-terms and associated accessions enriched for drought and related stresses
GO_acc	term_type	Term	queryitem	querytotal	bgitem	bgtotal	pvalue	FDR	entries
GO:0009415	P	response to water	58	130	393	26245	1.2e-67	2.5e-65	Sb08g019700 Sb08g004840 Sb01g019850 Sb05g005470 Sb09g003060 Sb01g005990 Sb02g028770 Sb07g007610 Sb10g026910 Sb02g038130 Sb09g030600 Sb04g004250 Sb03g006060 Sb10g023010 Sb03g034680 Sb02g003090 Sb01g007120 Sb01g033060 Sb01g039740 Sb03g004540 Sb01g047540 Sb02g025790 Sb07g022990 Sb07g024160 Sb01g003880 Sb10g027490 Sb01g048440 Sb03g026070 Sb10g025470 Sb04g006970 Sb01g039890 Sb04g036240 Sb08g005200 Sb0…
GO:0009414	P	response to water deprivation	56	130	374	26245	1.9e-65	2e-63	Sb08g019700 Sb08g004840 Sb01g019850 Sb05g005470 Sb09g003060 Sb01g005990 Sb02g028770 Sb07g007610 Sb10g026910 Sb02g038130 Sb09g030600 Sb04g004250 Sb03g026070 Sb10g023010 Sb03g034680 Sb02g003090 Sb01g007120 Sb01g039740 Sb03g004540 Sb01g047540 Sb02g025790 Sb07g022990 Sb07g024160 Sb01g003880 Sb10g027490 Sb01g048440 Sb10g025470 Sb04g006970 Sb01g039890 Sb04g036240 Sb08g005200 Sb03g006060 Sb10g022780 Sb0…
GO:0009628	P	response to abiotic stimulus	75	130	2423	26245	6.6e-43	4.7e-41	Sb01g038760 Sb08g019700 Sb04g002790 Sb08g004840 Sb01g019850 Sb01g033570 Sb09g003060 Sb01g005990 Sb01g049020 Sb06g025710 Sb07g007610 Sb10g026910 Sb02g038130 Sb09g030600 Sb02g008820 Sb10g003810 Sb04g004250 Sb03g026070 Sb10g023010 Sb03g034680 Sb03g004540 Sb10g022780 Sb01g007120 Sb01g033060 Sb04g022410 Sb01g039740 Sb01g008730 Sb02g003090 Sb05g005470 Sb01g047540 Sb03g029570 Sb02g025790 Sb05g009360 Sb0…
GO:0042221	P	response to chemical stimulus	80	130	3244	26245	2.1e-39	1.1e-37	Sb01g038760 Sb08g019700 Sb08g004840 Sb01g019850 Sb05g005470 Sb06g001720 Sb01g005990 Sb02g028770 Sb07g007610 Sb10g026910 Sb03g038600 Sb02g038130 Sb10g022200 Sb09g030600 Sb02g008820 Sb10g003810 Sb04g004250 Sb03g026070 Sb10g023010 Sb03g034680 Sb03g004540 Sb05g001000 Sb01g007120 Sb01g033060 Sb01g039740 Sb01g008730 Sb02g003090 Sb01g031870 Sb01g047540 Sb04g021990 Sb02g025790 Sb09g003060 Sb05g009360 Sb0…
GO:0006970	P	response to osmotic stress	43	130	631	26245	5.6e-36	2.4e-34	Sb01g038760 Sb08g019700 Sb04g002790 Sb08g004840 Sb01g033570 Sb09g003060 Sb02g028770 Sb10g026910 Sb09g030600 Sb10g003810 Sb04g004250 Sb03g026070 Sb03g034680 Sb01g007120 Sb01g033060 Sb04g022410 Sb01g039740 Sb01g008730 Sb05g005470 Sb03g029570 Sb05g009360 Sb03g040355 Sb10g027490 Sb01g038750 Sb02g025790 Sb10g002070 Sb07g028940 Sb04g036240 Sb08g005200 Sb10g006330 Sb09g002320 Sb03g030100 Sb08g005190 Sb0…
GO:0006950	P	response to stress	80	130	3705	26245	2.8e-35	1e-33	Sb01g038760 Sb08g019700 Sb04g002790 Sb08g004840 Sb01g019850 Sb01g033570 Sb09g003060 Sb01g005990 Sb02g028770 Sb06g025710 Sb07g007610 Sb10g026910 Sb02g038130 Sb10g022780 Sb09g030600 Sb02g008820 Sb10g003810 Sb04g004250 Sb01g035380 Sb10g023010 Sb03g034680 Sb03g004540 Sb05g001000 Sb01g007120 Sb01g033060 Sb04g022410 Sb01g039740 Sb01g008730 Sb02g003090 Sb05g005470 Sb01g031870 Sb01g047540 Sb04g021990 Sb0…
GO:0009737	P	response to abscisic acid stimulus	40	130	664	26245	2.1e-31	6.5e-30	Sb08g019700 Sb08g004840 Sb05g005470 Sb06g001720 Sb07g007610 Sb10g026910 Sb03g038600 Sb01g028330 Sb09g030600 Sb10g022200 Sb03g026070 Sb10g023010 Sb01g007120 Sb01g039740 Sb03g004540 Sb10g003810 Sb09g003060 Sb01g038150 Sb02g025790 Sb01g048440 Sb10g025470 Sb10g002070 Sb01g039890 Sb08g005200 Sb08g005190 Sb09g002320 Sb03g006060 Sb09g023180 Sb03g039820 Sb0010s007790 Sb03g039630 Sb02g025080 Sb02g022090 S…
GO:0009651	P	response to salt stress	36	130	536	26245	1e-29	2.7e-28	Sb01g038760 Sb08g019700 Sb04g002790 Sb08g004840 Sb01g033570 Sb09g003060 Sb02g028770 Sb10g026910 Sb10g003810 Sb04g004250 Sb01g007120 Sb04g022410 Sb09g002320 Sb01g008730 Sb05g005470 Sb03g029570 Sb05g009360 Sb10g027490 Sb02g025790 Sb10g002070 Sb07g028940 Sb04g036240 Sb08g005200 Sb01g039740 Sb03g030100 Sb08g005190 Sb03g039820 Sb01g028750 Sb08g017750 Sb02g037780 Sb02g039640 Sb02g025080 Sb05g009350 Sb0…
GO:0050896	P	response to stimulus	88	130	6230	26245	5.1e-26	1.2e-24	Sb08g004840 Sb06g001720 Sb02g028770 Sb06g025710 Sb10g022200 Sb01g035380 Sb01g008730 Sb02g003090 Sb01g038150 Sb03g040355 Sb01g003880 Sb10g027490 Sb10g025470 Sb10g002070 Sb04g006970 Sb02g005200 Sb03g006060 Sb03g039820 Sb02g037780 Sb03g040510 Sb10g006330 Sb09g028710 Sb06g031240 Sb01g038760 Sb01g049020 Sb04g021990 Sb03g026070 Sb10g023010 Sb03g034680 Sb03g004540 Sb10g003810 Sb05g009360 Sb07g022990 Sb0…
GO:0009266	P	response to temperature stimulus	38	130	902	26245	2e-24	4.2e-23	Sb01g038760 Sb09g003060 Sb01g005990 Sb02g028770 Sb06g025710 Sb10g026910 Sb02g038130 Sb10g003810 Sb04g004250 Sb03g026070 Sb10g023010 Sb01g033060 Sb09g030600 Sb02g003090 Sb03g029570 Sb01g003880 Sb10g027490 Sb10g002070 Sb07g028940 Sb01g039890 Sb04g036240 Sb08g005200 Sb10g006330 Sb01g049020 Sb05g027870 Sb09g002320 Sb03g030100 Sb01g037090 Sb08g005190 Sb01g028750 Sb02g037780 Sb03g039630 Sb02g022090 Sb0…
GO:0009409	P	response to cold	32	130	625	26245	6.1e-23	1.2e-21	Sb09g003060 Sb01g005990 Sb01g049020 Sb10g026910 Sb02g038130 Sb10g003810 Sb04g004250 Sb03g026070 Sb05g027870 Sb01g033060 Sb09g030600 Sb02g003090 Sb03g029570 Sb10g027490 Sb10g002070 Sb01g039890 Sb04g036240 Sb08g005200 Sb10g006330 Sb09g002320 Sb03g030100 Sb01g037090 Sb08g005190 Sb01g028750 Sb02g037780 Sb03g039630 Sb02g022090 Sb03g040510 Sb01g031870 Sb09g028710 Sb02g043450 Sb02g022210
GO:0009725	P	response to hormone stimulus	44	130	1601	26245	2.8e-21	5.1e-20	Sb08g019700 Sb08g004840 Sb05g005470 Sb06g001720 Sb02g028770 Sb07g007610 Sb10g026910 Sb03g038600 Sb01g028330 Sb09g030600 Sb10g022200 Sb03g026070 Sb10g023010 Sb01g007120 Sb05g019540 Sb01g039740 Sb03g004540 Sb10g003810 Sb09g003060 Sb01g038150 Sb03g040355 Sb02g025790 Sb01g048440 Sb10g025470 Sb10g002070 Sb01g039890 Sb04g036240 Sb08g005200 Sb08g005190 Sb09g002320 Sb03g006060 Sb09g023180 Sb03g039820 Sb0…
GO:0055114	P	oxidation reduction	25	130	352	26245	3.4e-21	5.5e-20	Sb01g038760 Sb08g004840 Sb05g005470 Sb02g025790 Sb04g021990 Sb04g004250 Sb03g026070 Sb05g001000 Sb09g030600 Sb01g008730 Sb05g009360 Sb07g022990 Sb01g003880 Sb10g027490 Sb01g005670 Sb07g021630 Sb02g005200 Sb06g018220 Sb01g031520 Sb03g039820 Sb0010s007790 Sb04g000320 Sb02g037780 Sb05g009350 Sb09g022290
GO:0009738	P	abscisic acid mediated signaling pathway	20	130	192	26245	3.9e-20	6e-19	Sb08g019700 Sb03g026070 Sb03g006060 Sb09g023180 Sb0010s007790 Sb03g039630 Sb01g007120 Sb09g030600 Sb02g022090 Sb01g039890 Sb09g006700 Sb08g005200 Sb04g008040 Sb10g026910 Sb03g038600 Sb08g005190 Sb01g028330 Sb01g039740 Sb10g022200 Sb01g038150
GO:0070887	P	cellular response to chemical stimulus	34	130	941	26245	8.6e-20	1.2e-18	Sb01g038760 Sb08g019700 Sb02g025790 Sb01g005990 Sb10g026910 Sb03g038600 Sb02g038130 Sb01g028330 Sb10g022200 Sb03g026070 Sb10g023010 Sb01g007120 Sb09g030600 Sb02g003090 Sb04g021990 Sb01g038150 Sb03g040355 Sb01g003880 Sb10g003810 Sb01g039890 Sb08g005200 Sb08g005190 Sb01g039740 Sb03g030100 Sb03g006060 Sb09g023180 Sb0010s007790 Sb03g039630 Sb02g022090 Sb09g006700 Sb04g008040 Sb10g022780 Sb09g028710 S…
GO:0009719	P	response to endogenous stimulus	44	130	1755	26245	9.1e-20	1.2e-18	Sb08g019700 Sb08g004840 Sb05g005470 Sb06g001720 Sb02g028770 Sb07g007610 Sb10g026910 Sb03g038600 Sb01g028330 Sb09g030600 Sb10g022200 Sb03g026070 Sb10g023010 Sb01g007120 Sb05g019540 Sb01g039740 Sb03g004540 Sb10g003810 Sb09g003060 Sb01g038150 Sb03g040355 Sb02g025790 Sb01g048440 Sb10g025470 Sb10g002070 Sb01g039890 Sb04g036240 Sb08g005200 Sb08g005190 Sb09g002320 Sb03g006060 Sb09g023180 Sb03g039820 Sb0…
GO:0010035	P	response to inorganic substance	23	130	338	26245	3.7e-19	4.6e-18	Sb01g038760 Sb10g026910 Sb01g005990 Sb02g025790 Sb02g038130 Sb04g021990 Sb10g023010 Sb02g008820 Sb01g008730 Sb02g003090 Sb10g003810 Sb05g009360 Sb03g029570 Sb07g028940 Sb01g037090 Sb10g006330 Sb0010s007790 Sb02g037780 Sb05g009350 Sb01g033060 Sb10g022780 Sb02g043450 Sb02g022210
GO:0010033	P	response to organic substance	47	130	2117	26245	4e-19	4.8e-18	Sb08g019700 Sb08g004840 Sb05g005470 Sb06g001720 Sb02g028770 Sb07g007610 Sb10g026910 Sb03g038600 Sb01g028330 Sb09g030600 Sb10g022200 Sb03g026070 Sb10g023010 Sb01g007120 Sb05g019540 Sb01g039740 Sb03g004540 Sb10g003810 Sb09g003060 Sb01g038150 Sb03g040355 Sb01g003880 Sb02g025790 Sb01g048440 Sb10g025470 Sb10g002070 Sb01g039890 Sb04g036240 Sb08g005200 Sb08g005190 Sb09g002320 Sb03g006060 Sb09g023180 Sb0…
GO:0051716	P	cellular response to stimulus	37	130	1595	26245	1.9e-15	2.1e-14	Sb01g038760 Sb08g019700 Sb02g025790 Sb01g005990 Sb10g026910 Sb03g038600 Sb02g038130 Sb01g028330 Sb10g022200 Sb03g026070 Sb10g023010 Sb01g007120 Sb09g030600 Sb02g003090 Sb04g021990 Sb01g038150 Sb03g040355 Sb01g003880 Sb01g038750 Sb10g003810 Sb01g039890 Sb04g036240 Sb08g005200 Sb08g005190 Sb01g039740 Sb03g030100 Sb03g006060 Sb09g023180 Sb0010s007790 Sb08g017750 Sb03g039630 Sb02g022090 Sb09g006700 S…
GO:0046686	P	response to cadmium ion	14	130	116	26245	3.3e-15	3.5e-14	Sb01g038760 Sb10g006330 Sb05g009350 Sb02g037780 Sb01g005990 Sb02g008820 Sb01g008730 Sb02g003090 Sb01g033060 Sb03g029570 Sb02g038130 Sb10g022780 Sb05g009360 Sb02g022210
GO:0042631	P	cellular response to water deprivation	8	130	12	26245	3.4e-14	3.4e-13	Sb0010s007790 Sb01g005990 Sb02g003090 Sb02g022210 Sb02g038130 Sb10g022780 Sb09g028710 Sb03g030100
GO:0009755	P	hormone-mediated signaling pathway	23	130	608	26245	6.5e-14	6.3e-13	Sb08g019700 Sb10g026910 Sb02g025790 Sb03g038600 Sb01g028330 Sb10g022200 Sb03g026070 Sb10g023010 Sb01g007120 Sb09g030600 Sb03g006060 Sb01g038150 Sb03g040355 Sb01g039890 Sb08g005200 Sb09g023180 Sb01g039740 Sb08g005190 Sb0010s007790 Sb03g039630 Sb02g022090 Sb09g006700 Sb04g008040
GO:0032870	P	cellular response to hormone stimulus	23	130	627	26245	1.2e-13	1.1e-12	Sb08g019700 Sb10g026910 Sb02g025790 Sb03g038600 Sb01g028330 Sb10g022200 Sb03g026070 Sb10g023010 Sb01g007120 Sb09g030600 Sb03g006060 Sb01g038150 Sb03g040355 Sb01g039890 Sb08g005200 Sb09g023180 Sb01g039740 Sb08g005190 Sb0010s007790 Sb03g039630 Sb02g022090 Sb09g006700 Sb04g008040
GO:0010118	P	stomatal movement	14	130	189	26245	1.6e-12	1.4e-11	Sb08g019700 Sb01g028750 Sb01g048440 Sb03g026070 Sb10g025470 Sb03g039630 Sb01g007120 Sb09g030600 Sb02g022090 Sb01g039890 Sb07g007610 Sb10g026910 Sb05g021820 Sb06g031240
GO:0006979	P	response to oxidative stress	21	130	605	26245	4.3e-12	3.7e-11	Sb01g038760 Sb02g022210 Sb01g005990 Sb10g027490 Sb02g025790 Sb03g039820 Sb0010s007790 Sb05g001000 Sb10g002070 Sb10g022780 Sb02g003090 Sb01g037090 Sb04g021990 Sb10g026910 Sb02g038130 Sb10g023010 Sb02g005200 Sb09g022290 Sb02g043450 Sb10g003810 Sb04g004250
GO:0009269	P	response to desiccation	10	130	71	26245	8.3e-12	6.8e-11	Sb04g004250 Sb10g027490 Sb08g004840 Sb03g039820 Sb05g005470 Sb02g008820 Sb01g031870 Sb07g024160 Sb02g025790 Sb09g022290
GO:0016311	P	dephosphorylation	12	130	151	26245	3.2e-11	2.5e-10	Sb09g026860 Sb03g040355 Sb09g022410 Sb09g029080 Sb03g029890 Sb03g026070 Sb06g001720 Sb03g039630 Sb09g030600 Sb02g022090 Sb01g039890 Sb03g032740
GO:0009787	P	regulation of abscisic acid mediated signaling pathway	10	130	88	26245	5.8e-11	4.4e-10	Sb08g019700 Sb03g026070 Sb03g006060 Sb03g039630 Sb01g007120 Sb09g030600 Sb02g022090 Sb01g039890 Sb09g006700 Sb01g039740
GO:0010038	P	response to metal ion	14	130	260	26245	9.1e-11	6.7e-10	Sb01g038760 Sb10g006330 Sb05g009350 Sb02g037780 Sb01g005990 Sb02g008820 Sb01g008730 Sb02g003090 Sb01g033060 Sb03g029570 Sb02g038130 Sb10g022780 Sb05g009360 Sb02g022210
GO:0006470	P	protein amino acid dephosphorylation	11	130	132	26245	1.4e-10	9.6e-10	Sb09g026860 Sb03g026070 Sb09g029080 Sb03g029890 Sb09g022410 Sb06g001720 Sb03g039630 Sb09g030600 Sb02g022090 Sb01g039890 Sb03g032740
GO:0010119	P	regulation of stomatal movement	11	130	133	26245	1.5e-10	1e-09	Sb08g019700 Sb03g026070 Sb01g048440 Sb10g025470 Sb03g039630 Sb01g007120 Sb09g030600 Sb02g022090 Sb01g039890 Sb07g007610 Sb06g031240
GO:0006790	P	sulfur metabolic process	13	130	229	26245	2.4e-10	1.6e-09	Sb01g005670 Sb04g002790 Sb08g005190 Sb01g038750 Sb01g005990 Sb02g003090 Sb07g021630 Sb08g005200 Sb02g022210 Sb02g038130 Sb10g022780 Sb01g039740 Sb10g003810
GO:0008152	P	metabolic process	105	130	14876	26245	6.4e-09	4.1e-08	Sb08g004840 Sb06g001720 Sb02g028770 Sb06g025710 Sb02g043620 Sb06g033990 Sb10g003810 Sb02g026570 Sb04g004690 Sb01g035380 Sb09g021410 Sb08g003760 Sb09g023920 Sb01g008730 Sb02g003090 Sb03g040355 Sb01g003880 Sb10g027490 Sb10g025470 Sb10g002070 Sb04g006970 Sb07g021630 Sb03g039820 Sb01g045920 Sb02g005200 Sb03g006060 Sb01g031520 Sb04g000320 Sb02g037780 Sb03g040510 Sb06g031240 Sb01g038760 Sb03g029920 Sb0…
GO:0009966	P	regulation of signal transduction	13	130	311	26245	8.2e-09	5.2e-08	Sb08g019700 Sb03g026070 Sb08g005190 Sb01g038750 Sb03g039630 Sb01g007120 Sb09g030600 Sb02g022090 Sb01g039890 Sb09g006700 Sb08g005200 Sb03g006060 Sb01g039740
GO:0007242	P	intracellular signaling cascade	26	130	1430	26245	9.4e-09	5.7e-08	Sb08g019700 Sb10g026910 Sb02g025790 Sb03g038600 Sb01g028330 Sb10g022200 Sb03g006060 Sb10g023010 Sb01g007120 Sb09g030600 Sb10g003810 Sb01g038150 Sb03g040355 Sb01g003880 Sb01g038750 Sb03g026070 Sb01g039890 Sb08g005200 Sb08g005190 Sb01g039740 Sb09g023180 Sb0010s007790 Sb03g039630 Sb02g022090 Sb09g006700 Sb04g008040
GO:0010646	P	regulation of cell communication	13	130	326	26245	1.4e-08	8.3e-08	Sb08g019700 Sb03g026070 Sb08g005190 Sb01g038750 Sb03g039630 Sb01g007120 Sb09g030600 Sb02g022090 Sb01g039890 Sb09g006700 Sb08g005200 Sb03g006060 Sb01g039740
GO:0044262	P	cellular carbohydrate metabolic process	19	130	809	26245	2.6e-08	1.5e-07	Sb04g004690 Sb01g035380 Sb01g005670 Sb01g037090 Sb10g006330 Sb03g034680 Sb01g019850 Sb08g017750 Sb02g037780 Sb01g007120 Sb08g019700 Sb01g017050 Sb03g004540 Sb01g033060 Sb03g029570 Sb01g047500 Sb01g047540 Sb03g034880 Sb02g043450
GO:0048583	P	regulation of response to stimulus	13	130	351	26245	3.3e-08	1.8e-07	Sb08g019700 Sb03g026070 Sb03g006060 Sb01g038750 Sb03g039630 Sb01g007120 Sb09g030600 Sb02g022090 Sb01g039890 Sb09g006700 Sb10g026910 Sb01g039740 Sb10g003810
GO:0044237	P	cellular metabolic process	92	130	12323	26245	3.6e-08	1.9e-07	Sb08g004840 Sb06g001720 Sb02g028770 Sb06g025710 Sb02g043620 Sb06g033990 Sb10g003810 Sb02g026570 Sb04g004690 Sb01g035380 Sb09g021410 Sb08g003760 Sb09g023920 Sb02g003090 Sb03g040355 Sb01g003880 Sb10g025470 Sb10g002070 Sb04g006970 Sb07g021630 Sb02g005200 Sb03g006060 Sb03g039820 Sb02g037780 Sb03g040510 Sb06g031240 Sb01g038760 Sb03g029920 Sb01g049020 Sb01g030570 Sb04g021990 Sb03g026070 Sb10g023010 Sb0…
GO:0033554	P	cellular response to stress	17	130	686	26245	7.1e-08	3.8e-07	Sb01g038760 Sb02g022210 Sb10g023010 Sb01g038750 Sb0010s007790 Sb08g017750 Sb01g005990 Sb02g003090 Sb04g036240 Sb03g030100 Sb10g003810 Sb10g026910 Sb02g038130 Sb10g022780 Sb09g028710 Sb01g039740 Sb04g021990
GO:0031668	P	cellular response to extracellular stimulus	9	130	147	26245	8.4e-08	4.4e-07	Sb0010s007790 Sb01g005990 Sb02g003090 Sb04g036240 Sb02g022210 Sb02g038130 Sb10g022780 Sb09g028710 Sb03g030100
GO:0016053	P	organic acid biosynthetic process	16	130	637	26245	1.5e-07	7.3e-07	Sb08g019700 Sb06g018220 Sb01g003880 Sb08g005190 Sb03g034680 Sb03g039820 Sb01g007120 Sb01g005670 Sb04g006970 Sb07g021630 Sb04g002790 Sb08g005200 Sb10g026910 Sb01g047540 Sb09g022290 Sb01g039740
GO:0046394	P	carboxylic acid biosynthetic process	16	130	637	26245	1.5e-07	7.3e-07	Sb08g019700 Sb06g018220 Sb01g003880 Sb08g005190 Sb03g034680 Sb03g039820 Sb01g007120 Sb01g005670 Sb04g006970 Sb07g021630 Sb04g002790 Sb08g005200 Sb10g026910 Sb01g047540 Sb09g022290 Sb01g039740
GO:0050794	P	regulation of cellular process	54	130	5663	26245	2.6e-07	1.3e-06	Sb08g019700 Sb03g037740 Sb04g002790 Sb10g026910 Sb03g029920 Sb02g028770 Sb06g025710 Sb06g026410 Sb01g030570 Sb02g043620 Sb03g038600 Sb01g028330 Sb09g021580 Sb10g022200 Sb02g026570 Sb02g022280 Sb10g023010 Sb08g003760 Sb01g007120 Sb05g019540 Sb09g023920 Sb09g030600 Sb10g003810 Sb01g038150 Sb03g040355 Sb01g003880 Sb01g038750 Sb01g048440 Sb03g026070 Sb10g025470 Sb02g025790 Sb04g006970 Sb01g039890 Sb0…
GO:0009788	P	negative regulation of abscisic acid mediated signaling pathway	6	130	49	26245	3e-07	1.4e-06	Sb03g026070 Sb03g006060 Sb03g039630 Sb09g030600 Sb02g022090 Sb01g039890
GO:0006749	P	glutathione metabolic process	5	130	25	26245	3.5e-07	1.6e-06	Sb02g038130 Sb02g003090 Sb01g005990 Sb02g022210 Sb10g022780
GO:0043289	P	apocarotenoid biosynthetic process	5	130	26	26245	4.1e-07	1.8e-06	Sb01g005670 Sb06g018220 Sb01g003880 Sb03g034680 Sb10g026910
GO:0009688	P	abscisic acid biosynthetic process	5	130	26	26245	4.1e-07	1.8e-06	Sb01g005670 Sb06g018220 Sb01g003880 Sb03g034680 Sb10g026910
GO:0042214	P	terpene metabolic process	6	130	53	26245	4.6e-07	2e-06	Sb01g005670 Sb01g003880 Sb03g034680 Sb06g018220 Sb10g026910 Sb01g047540
GO:0009968	P	negative regulation of signal transduction	8	130	132	26245	4.9e-07	2.1e-06	Sb03g026070 Sb03g006060 Sb03g039630 Sb09g030600 Sb02g022090 Sb01g039890 Sb08g005200 Sb08g005190
GO:0043436	P	oxoacid metabolic process	22	130	1301	26245	5.2e-07	2.1e-06	Sb08g019700 Sb04g002790 Sb02g028770 Sb10g026910 Sb03g034680 Sb01g017050 Sb01g007120 Sb03g029570 Sb01g003880 Sb03g035220 Sb10g002070 Sb06g018220 Sb04g006970 Sb04g036240 Sb08g005200 Sb01g039740 Sb01g005670 Sb08g005190 Sb03g039820 Sb07g021630 Sb01g047540 Sb09g022290
GO:0006082	P	organic acid metabolic process	22	130	1302	26245	5.2e-07	2.1e-06	Sb08g019700 Sb04g002790 Sb02g028770 Sb10g026910 Sb03g034680 Sb01g017050 Sb01g007120 Sb03g029570 Sb01g003880 Sb03g035220 Sb10g002070 Sb06g018220 Sb04g006970 Sb04g036240 Sb08g005200 Sb01g039740 Sb01g005670 Sb08g005190 Sb03g039820 Sb07g021630 Sb01g047540 Sb09g022290
GO:0019752	P	carboxylic acid metabolic process	22	130	1301	26245	5.2e-07	2.1e-06	Sb08g019700 Sb04g002790 Sb02g028770 Sb10g026910 Sb03g034680 Sb01g017050 Sb01g007120 Sb03g029570 Sb01g003880 Sb03g035220 Sb10g002070 Sb06g018220 Sb04g006970 Sb04g036240 Sb08g005200 Sb01g039740 Sb01g005670 Sb08g005190 Sb03g039820 Sb07g021630 Sb01g047540 Sb09g022290
GO:0010648	P	negative regulation of cell communication	8	130	134	26245	5.4e-07	2.1e-06	Sb03g026070 Sb03g006060 Sb03g039630 Sb09g030600 Sb02g022090 Sb01g039890 Sb08g005200 Sb08g005190
GO:0016106	P	sesquiterpenoid biosynthetic process	5	130	28	26245	5.7e-07	2.1e-06	Sb01g005670 Sb06g018220 Sb01g003880 Sb03g034680 Sb10g026910
GO:0051762	P	sesquiterpene biosynthetic process	5	130	28	26245	5.7e-07	2.1e-06	Sb01g005670 Sb06g018220 Sb01g003880 Sb03g034680 Sb10g026910
GO:0005985	P	sucrose metabolic process	5	130	28	26245	5.7e-07	2.1e-06	Sb08g019700 Sb03g004540 Sb01g033060 Sb01g007120 Sb10g006330
GO:0042180	P	cellular ketone metabolic process	22	130	1318	26245	6.4e-07	2.4e-06	Sb08g019700 Sb04g002790 Sb02g028770 Sb10g026910 Sb03g034680 Sb01g017050 Sb01g007120 Sb03g029570 Sb01g003880 Sb03g035220 Sb10g002070 Sb06g018220 Sb04g006970 Sb04g036240 Sb08g005200 Sb01g039740 Sb01g005670 Sb08g005190 Sb03g039820 Sb07g021630 Sb01g047540 Sb09g022290
GO:0005975	P	carbohydrate metabolic process	23	130	1452	26245	8.4e-07	3e-06	Sb08g019700 Sb01g019850 Sb02g028770 Sb04g004690 Sb01g035380 Sb03g034680 Sb01g007120 Sb03g004540 Sb04g030950 Sb03g029570 Sb03g034880 Sb01g045920 Sb03g030100 Sb01g005670 Sb01g037090 Sb10g006330 Sb08g017750 Sb02g037780 Sb01g017050 Sb01g033060 Sb01g047500 Sb01g047540 Sb02g043450
GO:0009408	P	response to heat	11	130	324	26245	8.9e-07	3.2e-06	Sb01g038760 Sb03g026070 Sb01g003880 Sb10g023010 Sb02g028770 Sb06g025710 Sb01g037090 Sb10g026910 Sb07g028940 Sb09g030600 Sb02g043450
GO:0044248	P	cellular catabolic process	22	130	1352	26245	9.7e-07	3.4e-06	Sb01g038760 Sb02g025790 Sb01g019850 Sb06g025710 Sb07g007610 Sb10g026910 Sb04g021990 Sb04g004690 Sb03g029570 Sb01g048440 Sb10g025470 Sb10g002070 Sb08g005200 Sb02g005200 Sb01g039740 Sb08g005190 Sb0010s007790 Sb02g037780 Sb01g017050 Sb01g047500 Sb01g047540 Sb06g031240
GO:0009687	P	abscisic acid metabolic process	5	130	32	26245	1e-06	3.6e-06	Sb01g005670 Sb06g018220 Sb01g003880 Sb03g034680 Sb10g026910
GO:0000302	P	response to reactive oxygen species	9	130	203	26245	1.1e-06	3.8e-06	Sb01g038760 Sb01g037090 Sb10g023010 Sb02g025790 Sb0010s007790 Sb10g003810 Sb10g026910 Sb02g043450 Sb04g021990
GO:0009987	P	cellular process	106	130	16277	26245	1.2e-06	4.1e-06	Sb08g004840 Sb06g001720 Sb02g028770 Sb06g025710 Sb02g043620 Sb06g033990 Sb10g022200 Sb02g026570 Sb04g004690 Sb01g035380 Sb09g021410 Sb08g003760 Sb09g023920 Sb02g003090 Sb01g038150 Sb03g040355 Sb01g003880 Sb10g025470 Sb10g002070 Sb04g006970 Sb07g021630 Sb03g032530 Sb02g005200 Sb03g006060 Sb03g039820 Sb02g037780 Sb03g040510 Sb10g006330 Sb09g028710 Sb06g031240 Sb01g038760 Sb03g029920 Sb01g049020 Sb0…
GO:0043288	P	apocarotenoid metabolic process	5	130	34	26245	1.4e-06	4.3e-06	Sb01g005670 Sb06g018220 Sb01g003880 Sb03g034680 Sb10g026910
GO:0051761	P	sesquiterpene metabolic process	5	130	34	26245	1.4e-06	4.3e-06	Sb01g005670 Sb06g018220 Sb01g003880 Sb03g034680 Sb10g026910
GO:0006714	P	sesquiterpenoid metabolic process	5	130	34	26245	1.4e-06	4.3e-06	Sb01g005670 Sb06g018220 Sb01g003880 Sb03g034680 Sb10g026910
GO:0046246	P	terpene biosynthetic process	5	130	39	26245	2.5e-06	7.9e-06	Sb01g005670 Sb06g018220 Sb01g003880 Sb03g034680 Sb10g026910
GO:0046700	P	heterocycle catabolic process	6	130	82	26245	5e-06	1.5e-05	Sb01g048440 Sb10g025470 Sb07g007610 Sb02g025790 Sb02g005200 Sb06g031240
GO:0032787	P	monocarboxylic acid metabolic process	14	130	661	26245	6.4e-06	2e-05	Sb08g019700 Sb06g018220 Sb01g003880 Sb08g005190 Sb03g034680 Sb01g017050 Sb01g007120 Sb01g005670 Sb04g006970 Sb04g036240 Sb08g005200 Sb10g026910 Sb01g047540 Sb02g028770
GO:0009991	P	response to extracellular stimulus	9	130	255	26245	6.8e-06	2e-05	Sb0010s007790 Sb01g005990 Sb02g003090 Sb04g036240 Sb02g022210 Sb02g038130 Sb10g022780 Sb09g028710 Sb03g030100
GO:0006081	P	cellular aldehyde metabolic process	5	130	49	26245	7e-06	2.1e-05	Sb05g005470 Sb01g047540 Sb08g004840 Sb02g025790 Sb01g017050
GO:0006518	P	peptide metabolic process	5	130	50	26245	7.7e-06	2.2e-05	Sb02g038130 Sb02g003090 Sb01g005990 Sb02g022210 Sb10g022780
GO:0016137	P	glycoside metabolic process	6	130	98	26245	1.3e-05	3.8e-05	Sb08g019700 Sb01g005670 Sb10g006330 Sb01g007120 Sb03g004540 Sb01g033060
GO:0034641	P	cellular nitrogen compound metabolic process	14	130	718	26245	1.6e-05	4.5e-05	Sb01g003880 Sb01g038750 Sb03g039820 Sb03g035220 Sb10g002070 Sb01g047540 Sb07g021630 Sb04g002790 Sb02g025790 Sb10g026910 Sb02g005200 Sb09g022290 Sb01g039740 Sb10g003810
GO:0006972	P	hyperosmotic response	7	130	155	26245	1.6e-05	4.6e-05	Sb04g004250 Sb10g027490 Sb03g039820 Sb09g003060 Sb02g037780 Sb10g026910 Sb09g022290
GO:0048585	P	negative regulation of response to stimulus	7	130	156	26245	1.7e-05	4.7e-05	Sb03g026070 Sb03g006060 Sb03g039630 Sb09g030600 Sb02g022090 Sb01g039890 Sb10g026910
GO:0051186	P	cofactor metabolic process	11	130	452	26245	1.9e-05	5.3e-05	Sb04g002790 Sb02g025790 Sb01g005990 Sb02g003090 Sb03g029570 Sb10g026910 Sb02g038130 Sb02g005200 Sb10g022780 Sb01g047540 Sb02g022210
GO:0010565	P	regulation of cellular ketone metabolic process	5	130	62	26245	2e-05	5.5e-05	Sb08g005190 Sb01g003880 Sb08g005200 Sb03g034680 Sb02g028770
GO:0050789	P	regulation of biological process	54	130	6509	26245	2.2e-05	5.9e-05	Sb08g019700 Sb03g037740 Sb04g002790 Sb10g026910 Sb03g029920 Sb02g028770 Sb06g025710 Sb06g026410 Sb01g030570 Sb02g043620 Sb03g038600 Sb01g028330 Sb09g021580 Sb10g022200 Sb02g026570 Sb02g022280 Sb10g023010 Sb08g003760 Sb01g007120 Sb05g019540 Sb09g023920 Sb09g030600 Sb10g003810 Sb01g038150 Sb03g040355 Sb01g003880 Sb01g038750 Sb01g048440 Sb03g026070 Sb10g025470 Sb02g025790 Sb04g006970 Sb01g039890 Sb0…
GO:0042542	P	response to hydrogen peroxide	7	130	167	26245	2.6e-05	6.6e-05	Sb01g038760 Sb01g037090 Sb10g023010 Sb0010s007790 Sb10g003810 Sb02g043450 Sb04g021990
GO:0005984	P	disaccharide metabolic process	5	130	65	26245	2.5e-05	6.6e-05	Sb08g019700 Sb03g004540 Sb01g033060 Sb01g007120 Sb10g006330
GO:0009058	P	biosynthetic process	56	130	6890	26245	2.6e-05	6.6e-05	Sb08g019700 Sb03g037740 Sb04g002790 Sb10g026910 Sb03g029920 Sb03g035220 Sb02g028770 Sb06g025710 Sb06g026410 Sb01g030570 Sb02g043620 Sb09g021580 Sb10g003810 Sb02g026570 Sb01g035380 Sb10g023010 Sb08g003760 Sb05g019540 Sb01g017050 Sb01g007120 Sb01g033060 Sb09g023920 Sb03g004540 Sb03g034880 Sb03g040355 Sb01g003880 Sb01g038750 Sb01g048440 Sb02g022280 Sb10g025470 Sb10g002070 Sb01g005670 Sb04g006970 Sb0…
GO:0006355	P	regulation of transcription, DNA-dependent	22	130	1682	26245	3e-05	7.5e-05	Sb03g037740 Sb03g029920 Sb01g049020 Sb06g025710 Sb06g026410 Sb01g030570 Sb02g043620 Sb02g026570 Sb02g022280 Sb10g023010 Sb08g003760 Sb05g019540 Sb09g023920 Sb03g040355 Sb09g021580 Sb04g006970 Sb01g036810 Sb03g040970 Sb01g010070 Sb10g007090 Sb02g025080 Sb03g040510
GO:0007165	P	signal transduction	26	130	2211	26245	3.1e-05	7.8e-05	Sb08g019700 Sb10g026910 Sb02g025790 Sb03g038600 Sb01g028330 Sb10g022200 Sb03g006060 Sb10g023010 Sb01g007120 Sb09g030600 Sb10g003810 Sb01g038150 Sb03g040355 Sb01g003880 Sb01g038750 Sb03g026070 Sb01g039890 Sb08g005200 Sb08g005190 Sb01g039740 Sb09g023180 Sb0010s007790 Sb03g039630 Sb02g022090 Sb09g006700 Sb04g008040
GO:0016114	P	terpenoid biosynthetic process	6	130	117	26245	3.4e-05	8.3e-05	Sb01g005670 Sb01g003880 Sb03g034680 Sb06g018220 Sb10g026910 Sb01g047540
GO:0044238	P	primary metabolic process	87	130	12901	26245	3.4e-05	8.3e-05	Sb06g001720 Sb02g028770 Sb06g025710 Sb02g043620 Sb06g033990 Sb02g026570 Sb04g004690 Sb01g035380 Sb09g021410 Sb08g003760 Sb09g023920 Sb02g003090 Sb03g040355 Sb01g003880 Sb10g025470 Sb10g002070 Sb04g006970 Sb07g021630 Sb01g045920 Sb03g006060 Sb03g039820 Sb02g037780 Sb03g040510 Sb06g031240 Sb08g019700 Sb03g029920 Sb01g049020 Sb01g030570 Sb03g026070 Sb10g023010 Sb01g048440 Sb03g004540 Sb04g030950 Sb0…
GO:0006732	P	coenzyme metabolic process	9	130	316	26245	3.5e-05	8.5e-05	Sb04g002790 Sb01g005990 Sb02g003090 Sb03g029570 Sb10g026910 Sb02g038130 Sb01g047540 Sb10g022780 Sb02g022210
GO:0042538	P	hyperosmotic salinity response	6	130	125	26245	4.8e-05	0.00012	Sb04g004250 Sb10g027490 Sb03g039820 Sb09g003060 Sb10g026910 Sb09g022290
GO:0042742	P	defense response to bacterium	8	130	261	26245	5.9e-05	0.00014	Sb08g019700 Sb05g027870 Sb03g034680 Sb01g010070 Sb01g007120 Sb03g029570 Sb10g026910 Sb10g003810
GO:0044271	P	cellular nitrogen compound biosynthetic process	11	130	513	26245	5.9e-05	0.00014	Sb01g003880 Sb01g038750 Sb03g039820 Sb10g002070 Sb07g021630 Sb04g002790 Sb10g026910 Sb01g047540 Sb09g022290 Sb01g039740 Sb10g003810
GO:0044249	P	cellular biosynthetic process	53	130	6576	26245	6.4e-05	0.00015	Sb08g019700 Sb03g037740 Sb04g002790 Sb10g026910 Sb03g029920 Sb02g028770 Sb06g025710 Sb06g026410 Sb01g030570 Sb02g043620 Sb09g021580 Sb10g003810 Sb02g026570 Sb01g035380 Sb10g023010 Sb08g003760 Sb01g017050 Sb01g007120 Sb05g019540 Sb09g023920 Sb03g004540 Sb03g034880 Sb03g040355 Sb01g003880 Sb01g038750 Sb01g048440 Sb02g022280 Sb10g025470 Sb10g002070 Sb01g005670 Sb04g006970 Sb07g021630 Sb08g005200 Sb0…
GO:0051252	P	regulation of RNA metabolic process	22	130	1782	26245	7e-05	0.00016	Sb03g037740 Sb03g029920 Sb01g049020 Sb06g025710 Sb06g026410 Sb01g030570 Sb02g043620 Sb02g026570 Sb02g022280 Sb10g023010 Sb08g003760 Sb05g019540 Sb09g023920 Sb03g040355 Sb09g021580 Sb04g006970 Sb01g036810 Sb03g040970 Sb01g010070 Sb10g007090 Sb02g025080 Sb03g040510
GO:0046483	P	heterocycle metabolic process	13	130	739	26245	9.1e-05	0.00021	Sb01g003880 Sb01g048440 Sb03g039820 Sb10g025470 Sb01g047540 Sb07g007610 Sb02g025790 Sb10g026910 Sb02g005200 Sb09g022290 Sb06g031240 Sb10g003810 Sb01g038750
GO:0008299	P	isoprenoid biosynthetic process	6	130	149	26245	0.00012	0.00027	Sb01g005670 Sb01g003880 Sb03g034680 Sb06g018220 Sb10g026910 Sb01g047540
GO:0009311	P	oligosaccharide metabolic process	5	130	93	26245	0.00013	0.00028	Sb08g019700 Sb03g004540 Sb01g033060 Sb01g007120 Sb10g006330
GO:0006721	P	terpenoid metabolic process	6	130	154	26245	0.00015	0.00032	Sb01g005670 Sb01g003880 Sb03g034680 Sb06g018220 Sb10g026910 Sb01g047540
GO:0006351	P	transcription, DNA-dependent	22	130	1892	26245	0.00016	0.00036	Sb03g037740 Sb03g029920 Sb01g049020 Sb06g025710 Sb06g026410 Sb01g030570 Sb02g043620 Sb02g026570 Sb02g022280 Sb10g023010 Sb08g003760 Sb05g019540 Sb09g023920 Sb03g040355 Sb09g021580 Sb04g006970 Sb01g036810 Sb03g040970 Sb01g010070 Sb10g007090 Sb02g025080 Sb03g040510
GO:0032774	P	RNA biosynthetic process	22	130	1893	26245	0.00017	0.00036	Sb03g037740 Sb03g029920 Sb01g049020 Sb06g025710 Sb06g026410 Sb01g030570 Sb02g043620 Sb02g026570 Sb02g022280 Sb10g023010 Sb08g003760 Sb05g019540 Sb09g023920 Sb03g040355 Sb09g021580 Sb04g006970 Sb01g036810 Sb03g040970 Sb01g010070 Sb10g007090 Sb02g025080 Sb03g040510
GO:0019318	P	hexose metabolic process	8	130	309	26245	0.00018	0.00039	Sb04g004690 Sb01g035380 Sb01g037090 Sb02g037780 Sb01g017050 Sb03g004540 Sb01g047540 Sb02g043450
GO:0065007	P	biological regulation	56	130	7386	26245	0.0002	0.00042	Sb08g019700 Sb03g037740 Sb04g002790 Sb10g026910 Sb03g029920 Sb02g028770 Sb06g025710 Sb06g026410 Sb01g030570 Sb02g043620 Sb03g038600 Sb01g028330 Sb09g021580 Sb10g022200 Sb02g026570 Sb02g022280 Sb10g023010 Sb08g003760 Sb01g007120 Sb05g019540 Sb09g023920 Sb09g030600 Sb10g003810 Sb01g038150 Sb03g040355 Sb01g003880 Sb01g038750 Sb01g048440 Sb03g026070 Sb10g025470 Sb02g025790 Sb04g006970 Sb01g039890 Sb0…
GO:0008610	P	lipid biosynthetic process	12	130	694	26245	0.0002	0.00042	Sb08g019700 Sb06g018220 Sb01g003880 Sb08g005190 Sb03g034680 Sb01g007120 Sb01g005670 Sb04g006970 Sb04g036240 Sb08g005200 Sb10g026910 Sb01g047540
GO:0009642	P	response to light intensity	6	130	164	26245	0.0002	0.00042	Sb03g026070 Sb01g037090 Sb10g023010 Sb09g030600 Sb02g043450 Sb03g030100
GO:0009416	P	response to light stimulus	14	130	965	26245	0.00035	0.00071	Sb03g026070 Sb01g037090 Sb08g005190 Sb01g038750 Sb09g030600 Sb04g036240 Sb08g005200 Sb03g030100 Sb05g021820 Sb10g023010 Sb07g028940 Sb05g027870 Sb02g043450 Sb07g022990
GO:0006720	P	isoprenoid metabolic process	6	130	187	26245	0.0004	0.00081	Sb01g005670 Sb01g003880 Sb03g034680 Sb06g018220 Sb10g026910 Sb01g047540
GO:0009644	P	response to high light intensity	5	130	121	26245	0.00041	0.00082	Sb03g026070 Sb01g037090 Sb10g023010 Sb02g043450 Sb09g030600
GO:0009314	P	response to radiation	14	130	988	26245	0.00044	0.00087	Sb03g026070 Sb01g037090 Sb08g005190 Sb01g038750 Sb09g030600 Sb04g036240 Sb08g005200 Sb03g030100 Sb05g021820 Sb10g023010 Sb07g028940 Sb05g027870 Sb02g043450 Sb07g022990
GO:0009056	P	catabolic process	24	130	2324	26245	0.00046	0.00091	Sb01g038760 Sb10g026910 Sb01g019850 Sb02g028770 Sb06g025710 Sb07g007610 Sb02g025790 Sb04g021990 Sb04g004690 Sb09g002320 Sb03g029570 Sb01g048440 Sb10g025470 Sb10g002070 Sb08g005200 Sb02g005200 Sb01g039740 Sb08g005190 Sb0010s007790 Sb02g037780 Sb01g017050 Sb01g047500 Sb01g047540 Sb06g031240
GO:0006796	P	phosphate metabolic process	22	130	2044	26245	0.00047	0.00093	Sb08g019700 Sb09g029080 Sb01g033570 Sb06g001720 Sb06g033990 Sb09g026860 Sb03g026070 Sb09g021410 Sb01g007120 Sb04g022410 Sb09g030600 Sb03g040355 Sb01g038750 Sb03g029890 Sb09g022410 Sb08g005200 Sb03g032740 Sb08g005190 Sb01g039890 Sb03g039630 Sb02g039640 Sb02g022090
GO:0031323	P	regulation of cellular metabolic process	31	130	3387	26245	0.00049	0.00095	Sb03g037740 Sb04g002790 Sb03g029920 Sb02g028770 Sb06g025710 Sb06g026410 Sb01g030570 Sb02g043620 Sb02g026570 Sb02g022280 Sb10g023010 Sb08g003760 Sb05g019540 Sb09g023920 Sb09g030600 Sb03g040355 Sb01g003880 Sb01g038750 Sb09g021580 Sb03g026070 Sb04g006970 Sb08g005200 Sb01g036810 Sb01g049020 Sb03g034680 Sb03g040970 Sb08g005190 Sb01g010070 Sb10g007090 Sb02g025080 Sb03g040510
GO:0006793	P	phosphorus metabolic process	22	130	2050	26245	0.00049	0.00095	Sb08g019700 Sb09g029080 Sb01g033570 Sb06g001720 Sb06g033990 Sb09g026860 Sb03g026070 Sb09g021410 Sb01g007120 Sb04g022410 Sb09g030600 Sb03g040355 Sb01g038750 Sb03g029890 Sb09g022410 Sb08g005200 Sb03g032740 Sb08g005190 Sb01g039890 Sb03g039630 Sb02g039640 Sb02g022090
GO:0009889	P	regulation of biosynthetic process	28	130	2954	26245	0.00057	0.0011	Sb03g037740 Sb04g002790 Sb03g029920 Sb02g028770 Sb06g025710 Sb06g026410 Sb01g030570 Sb02g043620 Sb02g026570 Sb02g022280 Sb10g023010 Sb08g003760 Sb05g019540 Sb09g023920 Sb03g040355 Sb01g003880 Sb09g021580 Sb04g006970 Sb08g005200 Sb01g036810 Sb01g049020 Sb03g034680 Sb03g040970 Sb08g005190 Sb01g010070 Sb10g007090 Sb02g025080 Sb03g040510
GO:0048584	P	positive regulation of response to stimulus	5	130	133	26245	0.00062	0.0012	Sb08g019700 Sb09g006700 Sb01g007120 Sb01g039740 Sb10g003810
GO:0009309	P	amine biosynthetic process	7	130	288	26245	0.00067	0.0012	Sb01g003880 Sb03g039820 Sb10g002070 Sb07g021630 Sb04g002790 Sb09g022290 Sb01g039740
GO:0044272	P	sulfur compound biosynthetic process	5	130	137	26245	0.0007	0.0013	Sb07g021630 Sb04g002790 Sb01g038750 Sb10g003810 Sb01g039740
GO:0048522	P	positive regulation of cellular process	10	130	590	26245	0.0008	0.0015	Sb08g019700 Sb03g040355 Sb10g023010 Sb03g034680 Sb01g007120 Sb03g040510 Sb09g006700 Sb08g005200 Sb08g005190 Sb01g039740
GO:0005996	P	monosaccharide metabolic process	8	130	397	26245	0.00092	0.0017	Sb04g004690 Sb01g035380 Sb01g037090 Sb02g037780 Sb01g017050 Sb03g004540 Sb01g047540 Sb02g043450
GO:0009617	P	response to bacterium	8	130	405	26245	0.001	0.0019	Sb08g019700 Sb05g027870 Sb03g034680 Sb01g010070 Sb01g007120 Sb03g029570 Sb10g026910 Sb10g003810
GO:0018130	P	heterocycle biosynthetic process	5	130	155	26245	0.0012	0.0021	Sb01g047540 Sb01g003880 Sb10g026910 Sb03g039820 Sb09g022290
GO:0031326	P	regulation of cellular biosynthetic process	27	130	2954	26245	0.0013	0.0022	Sb03g037740 Sb04g002790 Sb03g029920 Sb01g049020 Sb06g025710 Sb06g026410 Sb01g030570 Sb02g043620 Sb02g026570 Sb02g022280 Sb10g023010 Sb08g003760 Sb05g019540 Sb09g023920 Sb03g040355 Sb01g003880 Sb09g021580 Sb04g006970 Sb08g005200 Sb01g036810 Sb03g034680 Sb03g040970 Sb08g005190 Sb01g010070 Sb10g007090 Sb02g025080 Sb03g040510
GO:0046486	P	glycerolipid metabolic process	5	130	158	26245	0.0013	0.0023	Sb08g019700 Sb08g005190 Sb01g047540 Sb01g007120 Sb08g005200
GO:0008652	P	cellular amino acid biosynthetic process	6	130	247	26245	0.0016	0.0028	Sb01g003880 Sb03g039820 Sb07g021630 Sb04g002790 Sb09g022290 Sb01g039740
GO:0006073	P	cellular glucan metabolic process	6	130	250	26245	0.0017	0.003	Sb01g035380 Sb03g034680 Sb01g019850 Sb08g017750 Sb01g047500 Sb03g034880
GO:0019222	P	regulation of metabolic process	31	130	3658	26245	0.0017	0.003	Sb03g037740 Sb04g002790 Sb03g029920 Sb02g028770 Sb06g025710 Sb06g026410 Sb01g030570 Sb02g043620 Sb02g026570 Sb02g022280 Sb10g023010 Sb08g003760 Sb05g019540 Sb09g023920 Sb09g030600 Sb03g040355 Sb01g003880 Sb01g038750 Sb09g021580 Sb03g026070 Sb04g006970 Sb08g005200 Sb01g036810 Sb01g049020 Sb03g034680 Sb03g040970 Sb08g005190 Sb01g010070 Sb10g007090 Sb02g025080 Sb03g040510
GO:0006633	P	fatty acid biosynthetic process	6	130	255	26245	0.0019	0.0032	Sb08g019700 Sb08g005190 Sb01g007120 Sb04g006970 Sb08g005200 Sb01g047540
GO:0044042	P	glucan metabolic process	6	130	264	26245	0.0023	0.0038	Sb01g035380 Sb03g034680 Sb01g019850 Sb08g017750 Sb01g047500 Sb03g034880
GO:0044275	P	cellular carbohydrate catabolic process	6	130	267	26245	0.0024	0.004	Sb04g004690 Sb01g019850 Sb02g037780 Sb01g017050 Sb01g047500 Sb01g047540
GO:0006519	P	cellular amino acid and derivative metabolic process	14	130	1185	26245	0.0024	0.004	Sb01g005990 Sb01g003880 Sb10g022780 Sb03g039820 Sb03g035220 Sb10g002070 Sb02g028770 Sb02g003090 Sb07g021630 Sb04g002790 Sb02g038130 Sb09g022290 Sb01g039740 Sb02g022210
GO:0080090	P	regulation of primary metabolic process	28	130	3278	26245	0.0027	0.0045	Sb03g037740 Sb04g002790 Sb03g029920 Sb02g028770 Sb06g025710 Sb06g026410 Sb01g030570 Sb02g043620 Sb02g026570 Sb02g022280 Sb10g023010 Sb08g003760 Sb05g019540 Sb09g023920 Sb03g040355 Sb01g003880 Sb09g021580 Sb04g006970 Sb08g005200 Sb01g036810 Sb01g049020 Sb03g034680 Sb03g040970 Sb08g005190 Sb01g010070 Sb10g007090 Sb02g025080 Sb03g040510
GO:0016052	P	carbohydrate catabolic process	7	130	371	26245	0.0028	0.0045	Sb04g004690 Sb01g019850 Sb02g037780 Sb01g017050 Sb02g028770 Sb01g047500 Sb01g047540
GO:0019748	P	secondary metabolic process	11	130	826	26245	0.0029	0.0047	Sb06g018220 Sb01g003880 Sb01g038750 Sb0010s007790 Sb01g005670 Sb02g028770 Sb06g025710 Sb10g026910 Sb01g047540 Sb10g003810 Sb03g034680
GO:0016070	P	RNA metabolic process	26	130	2983	26245	0.003	0.0049	Sb03g037740 Sb10g026910 Sb03g029920 Sb01g049020 Sb06g025710 Sb06g026410 Sb01g030570 Sb02g043620 Sb02g026570 Sb02g022280 Sb10g023010 Sb08g003760 Sb05g019540 Sb09g023920 Sb03g040355 Sb09g021580 Sb04g006970 Sb08g005200 Sb01g036810 Sb01g039740 Sb03g040970 Sb08g005190 Sb01g010070 Sb10g007090 Sb02g025080 Sb03g040510
GO:0006631	P	fatty acid metabolic process	7	130	387	26245	0.0035	0.0055	Sb08g019700 Sb08g005190 Sb01g007120 Sb04g006970 Sb04g036240 Sb08g005200 Sb01g047540
GO:0009605	P	response to external stimulus	11	130	881	26245	0.0047	0.0075	Sb10g002070 Sb01g038750 Sb0010s007790 Sb01g005990 Sb02g003090 Sb04g036240 Sb03g030100 Sb02g038130 Sb10g022780 Sb09g028710 Sb02g022210
GO:0043687	P	post-translational protein modification	21	130	2301	26245	0.0047	0.0075	Sb08g019700 Sb09g026860 Sb09g022410 Sb09g029080 Sb09g021410 Sb01g038750 Sb03g029890 Sb03g026070 Sb01g033570 Sb06g001720 Sb03g039630 Sb01g007120 Sb02g039640 Sb04g022410 Sb09g030600 Sb02g022090 Sb01g039890 Sb10g026910 Sb06g033990 Sb03g032740 Sb01g039740
GO:0044255	P	cellular lipid metabolic process	12	130	1030	26245	0.0055	0.0086	Sb08g019700 Sb06g018220 Sb01g003880 Sb08g005190 Sb03g034680 Sb01g007120 Sb01g005670 Sb04g006970 Sb04g036240 Sb08g005200 Sb10g026910 Sb01g047540
GO:0006807	P	nitrogen compound metabolic process	45	130	6387	26245	0.0056	0.0087	Sb03g037740 Sb04g002790 Sb10g026910 Sb03g029920 Sb02g028770 Sb06g025710 Sb06g026410 Sb01g030570 Sb02g043620 Sb09g021580 Sb10g003810 Sb02g026570 Sb02g022280 Sb10g023010 Sb08g003760 Sb01g017050 Sb05g019540 Sb09g023920 Sb03g035220 Sb02g025790 Sb03g040355 Sb01g003880 Sb01g038750 Sb01g048440 Sb10g025470 Sb10g002070 Sb04g006970 Sb07g021630 Sb08g005200 Sb01g036810 Sb02g005200 Sb01g049020 Sb01g039740 Sb0…
GO:0009117	P	nucleotide metabolic process	7	130	425	26245	0.0057	0.0087	Sb04g002790 Sb01g048440 Sb10g025470 Sb01g017050 Sb07g007610 Sb01g047540 Sb06g031240
GO:0006753	P	nucleoside phosphate metabolic process	7	130	425	26245	0.0057	0.0087	Sb04g002790 Sb01g048440 Sb10g025470 Sb01g017050 Sb07g007610 Sb01g047540 Sb06g031240
GO:0006629	P	lipid metabolic process	14	130	1351	26245	0.0075	0.011	Sb08g019700 Sb06g018220 Sb01g003880 Sb08g005190 Sb03g034680 Sb01g007120 Sb01g005670 Sb04g006970 Sb04g036240 Sb04g002790 Sb08g005200 Sb10g026910 Sb01g047540 Sb09g002320
GO:0007154	P	cell communication	22	130	2569	26245	0.008	0.012	Sb08g019700 Sb01g005990 Sb02g038130 Sb03g026070 Sb01g007120 Sb09g030600 Sb02g003090 Sb01g038750 Sb01g039890 Sb04g036240 Sb08g005200 Sb03g006060 Sb01g039740 Sb03g030100 Sb08g005190 Sb0010s007790 Sb03g039630 Sb02g022090 Sb09g006700 Sb10g022780 Sb09g028710 Sb02g022210
GO:0006464	P	protein modification process	22	130	2593	26245	0.0089	0.013	Sb08g019700 Sb09g029080 Sb01g033570 Sb06g001720 Sb10g026910 Sb06g033990 Sb09g026860 Sb03g026070 Sb09g021410 Sb01g007120 Sb04g022410 Sb09g030600 Sb01g038750 Sb03g029890 Sb09g022410 Sb03g032740 Sb01g039740 Sb03g006060 Sb01g039890 Sb03g039630 Sb02g039640 Sb02g022090
GO:0044264	P	cellular polysaccharide metabolic process	6	130	357	26245	0.0093	0.014	Sb01g035380 Sb03g034680 Sb01g019850 Sb08g017750 Sb01g047500 Sb03g034880
GO:0016051	P	carbohydrate biosynthetic process	7	130	473	26245	0.0098	0.015	Sb01g035380 Sb03g034680 Sb08g017750 Sb01g017050 Sb02g028770 Sb03g004540 Sb03g034880
GO:0005976	P	polysaccharide metabolic process	7	130	474	26245	0.01	0.015	Sb01g035380 Sb03g034680 Sb01g019850 Sb08g017750 Sb02g028770 Sb01g047500 Sb03g034880
GO:0034637	P	cellular carbohydrate biosynthetic process	6	130	365	26245	0.01	0.015	Sb01g035380 Sb03g034680 Sb08g017750 Sb01g017050 Sb03g004540 Sb03g034880
GO:0055086	P	nucleobase, nucleoside and nucleotide metabolic process	7	130	477	26245	0.01	0.015	Sb04g002790 Sb01g048440 Sb10g025470 Sb01g017050 Sb07g007610 Sb01g047540 Sb06g031240
GO:0006066	P	alcohol metabolic process	8	130	611	26245	0.012	0.017	Sb04g004690 Sb01g035380 Sb01g037090 Sb02g037780 Sb01g017050 Sb03g004540 Sb01g047540 Sb02g043450
GO:0044260	P	cellular macromolecule metabolic process	57	130	8922	26245	0.013	0.018	Sb08g019700 Sb03g037740 Sb09g022410 Sb09g029080 Sb10g026910 Sb01g019850 Sb01g033570 Sb06g001720 Sb03g029920 Sb01g049020 Sb06g025710 Sb06g026410 Sb01g030570 Sb02g043620 Sb06g033990 Sb09g021580 Sb02g026570 Sb04g004690 Sb01g035380 Sb10g023010 Sb08g003760 Sb01g017050 Sb01g007120 Sb05g019540 Sb09g023920 Sb09g030600 Sb03g026070 Sb03g034880 Sb03g040355 Sb01g038750 Sb03g029890 Sb02g022280 Sb04g006970 Sb0…
GO:0044265	P	cellular macromolecule catabolic process	10	130	878	26245	0.013	0.018	Sb04g004690 Sb08g005190 Sb10g026910 Sb01g019850 Sb02g037780 Sb01g017050 Sb08g005200 Sb01g047500 Sb01g047540 Sb01g039740
GO:0044106	P	cellular amine metabolic process	8	130	621	26245	0.013	0.018	Sb01g003880 Sb03g039820 Sb03g035220 Sb10g002070 Sb07g021630 Sb04g002790 Sb09g022290 Sb01g039740
GO:0006520	P	cellular amino acid metabolic process	8	130	621	26245	0.013	0.018	Sb01g003880 Sb03g039820 Sb03g035220 Sb10g002070 Sb07g021630 Sb04g002790 Sb09g022290 Sb01g039740						Tot
GO:0048523	P	negative regulation of cellular process	10	130	898	26245	0.015	0.02	Sb03g026070 Sb03g006060 Sb03g039630 Sb01g049020 Sb02g022090 Sb01g039890 Sb08g005200 Sb10g026910 Sb08g005190 Sb09g030600
GO:0045449	P	regulation of transcription	22	130	2738	26245	0.016	0.022	Sb03g037740 Sb03g029920 Sb01g049020 Sb06g025710 Sb06g026410 Sb01g030570 Sb02g043620 Sb02g026570 Sb02g022280 Sb10g023010 Sb08g003760 Sb05g019540 Sb09g023920 Sb03g040355 Sb09g021580 Sb04g006970 Sb01g036810 Sb03g040970 Sb01g010070 Sb10g007090 Sb02g025080 Sb03g040510
GO:0009165	P	nucleotide biosynthetic process	5	130	293	26245	0.016	0.022	Sb10g025470 Sb07g007610 Sb06g031240 Sb01g048440 Sb01g017050
GO:0043412	P	macromolecule modification	22	130	2765	26245	0.018	0.024	Sb08g019700 Sb09g029080 Sb01g033570 Sb06g001720 Sb10g026910 Sb06g033990 Sb09g026860 Sb03g026070 Sb09g021410 Sb01g007120 Sb04g022410 Sb09g030600 Sb01g038750 Sb03g029890 Sb09g022410 Sb03g032740 Sb01g039740 Sb03g006060 Sb01g039890 Sb03g039630 Sb02g039640 Sb02g022090
GO:0019219	P	regulation of nucleobase, nucleoside, nucleotide and nucleic acid metabolic process	23	130	2930	26245	0.018	0.024	Sb03g037740 Sb04g002790 Sb03g029920 Sb01g049020 Sb06g025710 Sb06g026410 Sb01g030570 Sb02g043620 Sb02g026570 Sb02g022280 Sb10g023010 Sb08g003760 Sb05g019540 Sb09g023920 Sb03g040355 Sb09g021580 Sb04g006970 Sb01g036810 Sb03g040970 Sb01g010070 Sb10g007090 Sb02g025080 Sb03g040510
GO:0051171	P	regulation of nitrogen compound metabolic process	23	130	2975	26245	0.021	0.028	Sb03g037740 Sb04g002790 Sb03g029920 Sb01g049020 Sb06g025710 Sb06g026410 Sb01g030570 Sb02g043620 Sb02g026570 Sb02g022280 Sb10g023010 Sb08g003760 Sb05g019540 Sb09g023920 Sb03g040355 Sb09g021580 Sb04g006970 Sb01g036810 Sb03g040970 Sb01g010070 Sb10g007090 Sb02g025080 Sb03g040510
GO:0048580	P	regulation of post-embryonic development	5	130	319	26245	0.022	0.03	Sb08g019700 Sb01g007120 Sb02g025080 Sb01g010070 Sb01g049020
GO:0009308	P	amine metabolic process	9	130	827	26245	0.023	0.03	Sb01g003880 Sb03g039820 Sb03g035220 Sb10g002070 Sb02g028770 Sb07g021630 Sb04g002790 Sb09g022290 Sb01g039740
GO:0010556	P	regulation of macromolecule biosynthetic process	22	130	2879	26245	0.027	0.035	Sb03g037740 Sb03g029920 Sb01g049020 Sb06g025710 Sb06g026410 Sb01g030570 Sb02g043620 Sb02g026570 Sb02g022280 Sb10g023010 Sb08g003760 Sb05g019540 Sb09g023920 Sb03g040355 Sb09g021580 Sb04g006970 Sb01g036810 Sb03g040970 Sb01g010070 Sb10g007090 Sb02g025080 Sb03g040510
GO:0048518	P	positive regulation of biological process	12	130	1287	26245	0.027	0.035	Sb08g019700 Sb03g040355 Sb10g023010 Sb03g034680 Sb01g007120 Sb01g049020 Sb03g040510 Sb09g006700 Sb08g005200 Sb08g005190 Sb01g039740 Sb10g003810
GO:0048519	P	negative regulation of biological process	11	130	1175	26245	0.033	0.043	Sb03g026070 Sb03g006060 Sb03g039630 Sb02g025080 Sb01g049020 Sb02g022090 Sb01g039890 Sb08g005200 Sb10g026910 Sb08g005190 Sb09g030600
GO:0009791	P	post-embryonic development	14	130	1644	26245	0.034	0.044	Sb01g038760 Sb08g019700 Sb08g005190 Sb01g038750 Sb03g039820 Sb10g002070 Sb01g007120 Sb02g025080 Sb01g049020 Sb08g005200 Sb07g028940 Sb09g022290 Sb01g010070 Sb10g003810
GO:0006575	P	cellular amino acid derivative metabolic process	7	130	645	26245	0.043	0.055	Sb10g002070 Sb01g005990 Sb02g028770 Sb02g003090 Sb02g038130 Sb10g022780 Sb02g022210
GO:0022622	P	root system development	6	130	516	26245	0.045	0.057	Sb01g035380 Sb03g039820 Sb01g010070 Sb02g028770 Sb09g022290 Sb10g003810
GO:0048364	P	root development	6	130	516	26245	0.045	0.057	Sb01g035380 Sb03g039820 Sb01g010070 Sb02g028770 Sb09g022290 Sb10g003810
GO:0006350	P	transcription	22	130	3049	26245	0.046	0.058	Sb03g037740 Sb03g029920 Sb01g049020 Sb06g025710 Sb06g026410 Sb01g030570 Sb02g043620 Sb02g026570 Sb02g022280 Sb10g023010 Sb08g003760 Sb05g019540 Sb09g023920 Sb03g040355 Sb09g021580 Sb04g006970 Sb01g036810 Sb03g040970 Sb01g010070 Sb10g007090 Sb02g025080 Sb03g040510
GO:0010468	P	regulation of gene expression	22	130	3115	26245	0.056	0.07	Sb03g037740 Sb03g029920 Sb01g049020 Sb06g025710 Sb06g026410 Sb01g030570 Sb02g043620 Sb02g026570 Sb02g022280 Sb10g023010 Sb08g003760 Sb05g019540 Sb09g023920 Sb03g040355 Sb09g021580 Sb04g006970 Sb01g036810 Sb03g040970 Sb01g010070 Sb10g007090 Sb02g025080 Sb03g040510
GO:0006091	P	generation of precursor metabolites and energy	6	130	592	26245	0.076	0.095	Sb04g004690 Sb03g026070 Sb02g037780 Sb01g017050 Sb09g030600 Sb03g029570
GO:0044267	P	cellular protein metabolic process	27	130	4223	26245	0.095	0.12	Sb08g019700 Sb09g029080 Sb01g033570 Sb06g001720 Sb01g017050 Sb10g026910 Sb06g033990 Sb09g026860 Sb03g026070 Sb10g023010 Sb01g007120 Sb04g022410 Sb09g030600 Sb01g038750 Sb03g029890 Sb07g028940 Sb01g039890 Sb09g021410 Sb03g032740 Sb01g039740 Sb03g006060 Sb09g022410 Sb02g037780 Sb03g039630 Sb02g039640 Sb02g022090 Sb01g047540
GO:0006139	P	nucleobase, nucleoside, nucleotide and nucleic acid metabolic process	34	130	5556	26245	0.1	0.13	Sb03g037740 Sb04g002790 Sb10g026910 Sb03g029920 Sb01g049020 Sb06g025710 Sb06g026410 Sb01g030570 Sb02g043620 Sb09g021580 Sb02g026570 Sb02g022280 Sb10g023010 Sb08g003760 Sb01g017050 Sb05g019540 Sb09g023920 Sb03g040355 Sb01g048440 Sb10g025470 Sb04g006970 Sb08g005200 Sb01g036810 Sb01g039740 Sb03g040970 Sb08g005190 Sb01g010070 Sb08g017750 Sb10g007090 Sb02g025080 Sb03g040510 Sb07g007610 Sb01g047540 Sb0…
GO:0060255	P	regulation of macromolecule metabolic process	22	130	3378	26245	0.11	0.13	Sb03g037740 Sb03g029920 Sb01g049020 Sb06g025710 Sb06g026410 Sb01g030570 Sb02g043620 Sb02g026570 Sb02g022280 Sb10g023010 Sb08g003760 Sb05g019540 Sb09g023920 Sb03g040355 Sb09g021580 Sb04g006970 Sb01g036810 Sb03g040970 Sb01g010070 Sb10g007090 Sb02g025080 Sb03g040510
GO:0006952	P	defense response	8	130	977	26245	0.11	0.14	Sb08g019700 Sb05g027870 Sb03g034680 Sb01g010070 Sb01g007120 Sb03g029570 Sb10g026910 Sb10g003810
GO:0043170	P	macromolecule metabolic process	58	130	10245	26245	0.11	0.14	Sb08g019700 Sb03g037740 Sb09g022410 Sb09g029080 Sb10g026910 Sb01g019850 Sb01g033570 Sb06g001720 Sb03g029920 Sb02g028770 Sb06g025710 Sb06g026410 Sb01g030570 Sb02g043620 Sb06g033990 Sb09g021580 Sb02g026570 Sb04g004690 Sb01g035380 Sb10g023010 Sb08g003760 Sb01g017050 Sb01g007120 Sb05g019540 Sb09g023920 Sb09g030600 Sb01g047540 Sb03g026070 Sb03g034880 Sb03g040355 Sb01g038750 Sb03g029890 Sb02g022280 Sb0…
GO:0009607	P	response to biotic stimulus	10	130	1355	26245	0.14	0.17	Sb08g019700 Sb05g027870 Sb03g034680 Sb01g010070 Sb02g037780 Sb01g007120 Sb01g031870 Sb03g029570 Sb10g026910 Sb10g003810
GO:0051707	P	response to other organism	9	130	1255	26245	0.17	0.21	Sb08g019700 Sb05g027870 Sb03g034680 Sb01g010070 Sb01g007120 Sb01g031870 Sb03g029570 Sb10g026910 Sb10g003810
GO:0050793	P	regulation of developmental process	7	130	917	26245	0.17	0.21	Sb08g019700 Sb08g005190 Sb01g010070 Sb01g007120 Sb02g025080 Sb01g049020 Sb08g005200
GO:0006812	P	cation transport	5	130	608	26245	0.19	0.22	Sb10g025470 Sb01g028750 Sb07g007610 Sb06g031240 Sb01g048440
GO:0034645	P	cellular macromolecule biosynthetic process	27	130	4668	26245	0.22	0.26	Sb03g037740 Sb03g029920 Sb01g049020 Sb06g025710 Sb06g026410 Sb01g030570 Sb02g043620 Sb02g026570 Sb01g035380 Sb10g023010 Sb08g003760 Sb05g019540 Sb09g023920 Sb03g034880 Sb03g040355 Sb09g021580 Sb02g022280 Sb04g006970 Sb01g036810 Sb03g034680 Sb03g040970 Sb03g006060 Sb01g010070 Sb08g017750 Sb10g007090 Sb02g025080 Sb03g040510
GO:0048608	P	reproductive structure development	10	130	1520	26245	0.22	0.26	Sb01g038760 Sb08g005190 Sb01g038750 Sb03g039820 Sb10g002070 Sb01g049020 Sb08g005200 Sb07g028940 Sb09g022290 Sb10g003810
GO:0051239	P	regulation of multicellular organismal process	5	130	654	26245	0.23	0.26	Sb08g019700 Sb01g007120 Sb02g025080 Sb01g010070 Sb01g049020
GO:0009059	P	macromolecule biosynthetic process	27	130	4721	26245	0.24	0.27	Sb03g037740 Sb03g029920 Sb01g049020 Sb06g025710 Sb06g026410 Sb01g030570 Sb02g043620 Sb02g026570 Sb01g035380 Sb10g023010 Sb08g003760 Sb05g019540 Sb09g023920 Sb03g034880 Sb03g040355 Sb09g021580 Sb02g022280 Sb04g006970 Sb01g036810 Sb03g034680 Sb03g040970 Sb03g006060 Sb01g010070 Sb08g017750 Sb10g007090 Sb02g025080 Sb03g040510
GO:0009057	P	macromolecule catabolic process	11	130	1782	26245	0.27	0.31	Sb04g004690 Sb08g005190 Sb10g026910 Sb01g019850 Sb02g037780 Sb01g017050 Sb02g028770 Sb08g005200 Sb01g047500 Sb01g047540 Sb01g039740
GO:0051704	P	multi-organism process	10	130	1629	26245	0.29	0.33	Sb08g019700 Sb05g027870 Sb01g038750 Sb01g010070 Sb01g007120 Sb01g031870 Sb03g029570 Sb10g026910 Sb10g003810 Sb03g034680
GO:0003006	P	reproductive developmental process	10	130	1695	26245	0.33	0.38	Sb01g038760 Sb08g005190 Sb01g038750 Sb03g039820 Sb10g002070 Sb01g049020 Sb08g005200 Sb07g028940 Sb09g022290 Sb10g003810
GO:0019538	P	protein metabolic process	27	130	5015	26245	0.35	0.4	Sb08g019700 Sb09g029080 Sb01g033570 Sb06g001720 Sb01g017050 Sb10g026910 Sb06g033990 Sb09g026860 Sb03g026070 Sb10g023010 Sb01g007120 Sb04g022410 Sb09g030600 Sb01g038750 Sb03g029890 Sb07g028940 Sb01g039890 Sb09g021410 Sb03g032740 Sb01g039740 Sb03g006060 Sb09g022410 Sb02g037780 Sb03g039630 Sb02g039640 Sb02g022090 Sb01g047540
GO:0048513	P	organ development	12	130	2122	26245	0.36	0.41	Sb08g019700 Sb01g035380 Sb09g022290 Sb01g038750 Sb03g039820 Sb08g017750 Sb01g007120 Sb01g049020 Sb07g028940 Sb02g028770 Sb01g010070 Sb10g003810
GO:0048316	P	seed development	5	130	809	26245	0.37	0.42	Sb01g038760 Sb07g028940 Sb10g002070 Sb03g039820 Sb09g022290
GO:0006811	P	ion transport	5	130	812	26245	0.38	0.42	Sb10g025470 Sb01g028750 Sb07g007610 Sb06g031240 Sb01g048440
GO:0010154	P	fruit development	5	130	840	26245	0.4	0.45	Sb01g038760 Sb07g028940 Sb10g002070 Sb03g039820 Sb09g022290
GO:0040007	P	growth	8	130	1449	26245	0.43	0.48	Sb08g019700 Sb03g040355 Sb04g002790 Sb08g005190 Sb01g007120 Sb02g025080 Sb02g028770 Sb08g005200
GO:0016310	P	phosphorylation	10	130	1872	26245	0.45	0.5	Sb08g019700 Sb08g005190 Sb01g038750 Sb01g033570 Sb01g007120 Sb02g039640 Sb04g022410 Sb08g005200 Sb06g033990 Sb09g021410
GO:0048731	P	system development	12	130	2289	26245	0.46	0.51	Sb08g019700 Sb01g035380 Sb09g022290 Sb01g038750 Sb03g039820 Sb08g017750 Sb01g007120 Sb01g049020 Sb07g028940 Sb02g028770 Sb01g010070 Sb10g003810
GO:0006468	P	protein amino acid phosphorylation	8	130	1623	26245	0.56	0.61	Sb08g019700 Sb09g021410 Sb01g038750 Sb01g033570 Sb01g007120 Sb02g039640 Sb04g022410 Sb06g033990
GO:0010467	P	gene expression	23	130	4800	26245	0.61	0.66	Sb03g037740 Sb03g029920 Sb01g049020 Sb10g007090 Sb06g026410 Sb01g030570 Sb02g043620 Sb02g026570 Sb02g022280 Sb10g023010 Sb08g003760 Sb05g019540 Sb09g023920 Sb03g040355 Sb09g021580 Sb04g006970 Sb01g036810 Sb01g039740 Sb03g040970 Sb01g010070 Sb06g025710 Sb02g025080 Sb03g040510
GO:0051649	P	establishment of localization in cell	5	130	1122	26245	0.66	0.71	Sb03g032290 Sb09g003060 Sb07g021630 Sb10g026910 Sb07g028940
GO:0051641	P	cellular localization	5	130	1175	26245	0.7	0.75	Sb03g032290 Sb09g003060 Sb07g021630 Sb10g026910 Sb07g028940
GO:0022414	P	reproductive process	10	130	2350	26245	0.74	0.79	Sb01g038760 Sb08g005190 Sb01g038750 Sb03g039820 Sb10g002070 Sb01g049020 Sb08g005200 Sb07g028940 Sb09g022290 Sb10g003810
GO:0044085	P	cellular component biogenesis	5	130	1307	26245	0.78	0.83	Sb01g035380 Sb02g037780 Sb08g017750 Sb03g034680 Sb03g032530
GO:0048856	P	anatomical structure development	16	130	3841	26245	0.81	0.86	Sb01g038760 Sb01g035380 Sb09g022290 Sb08g005190 Sb01g038750 Sb03g039820 Sb08g017750 Sb08g019700 Sb10g002070 Sb01g007120 Sb02g028770 Sb08g005200 Sb07g028940 Sb01g049020 Sb01g010070 Sb10g003810
GO:0007275	P	multicellular organismal development	18	130	4512	26245	0.87	0.92	Sb01g038760 Sb01g035380 Sb09g022290 Sb08g005190 Sb01g038750 Sb03g039820 Sb08g017750 Sb08g019700 Sb10g002070 Sb01g007120 Sb02g025080 Sb02g028770 Sb03g040510 Sb08g005200 Sb07g028940 Sb01g049020 Sb01g010070 Sb10g003810
GO:0000003	P	reproduction	10	130	2747	26245	0.88	0.93	Sb01g038760 Sb08g005190 Sb01g038750 Sb03g039820 Sb10g002070 Sb01g049020 Sb08g005200 Sb07g028940 Sb09g022290 Sb10g003810
GO:0009653	P	anatomical structure morphogenesis	6	130	1835	26245	0.9	0.94	Sb01g035380 Sb08g005190 Sb01g010070 Sb08g017750 Sb02g028770 Sb08g005200
GO:0048869	P	cellular developmental process	5	130	1644	26245	0.91	0.95	Sb01g035380 Sb01g049020 Sb08g005200 Sb08g005190 Sb02g028770
GO:0051234	P	establishment of localization	12	130	3488	26245	0.94	0.96	Sb03g032290 Sb01g048440 Sb10g025470 Sb09g003060 Sb02g037780 Sb01g011020 Sb07g028940 Sb01g028750 Sb07g021630 Sb07g007610 Sb10g026910 Sb06g031240
GO:0009790	P	embryonic development	5	130	1689	26245	0.93	0.96	Sb01g038760 Sb09g022290 Sb01g010070 Sb03g039820 Sb07g028940
GO:0032501	P	multicellular organismal process	18	130	4820	26245	0.93	0.96	Sb01g038760 Sb01g035380 Sb09g022290 Sb08g005190 Sb01g038750 Sb03g039820 Sb08g017750 Sb08g019700 Sb10g002070 Sb01g007120 Sb02g025080 Sb02g028770 Sb03g040510 Sb08g005200 Sb07g028940 Sb01g049020 Sb01g010070 Sb10g003810
GO:0051179	P	localization	13	130	3700	26245	0.93	0.96	Sb03g032290 Sb04g002790 Sb01g048440 Sb10g025470 Sb09g003060 Sb02g037780 Sb01g011020 Sb07g028940 Sb01g028750 Sb07g021630 Sb07g007610 Sb10g026910 Sb06g031240
GO:0006810	P	transport	11	130	3430	26245	0.96	0.97	Sb03g032290 Sb01g048440 Sb10g025470 Sb09g003060 Sb02g037780 Sb07g028940 Sb01g028750 Sb01g011020 Sb07g007610 Sb10g026910 Sb06g031240
GO:0032502	P	developmental process	19	130	5263	26245	0.96	0.97	Sb01g038760 Sb01g035380 Sb09g022290 Sb08g005190 Sb01g038750 Sb03g039820 Sb03g040355 Sb08g017750 Sb08g019700 Sb10g002070 Sb01g007120 Sb02g025080 Sb02g028770 Sb03g040510 Sb08g005200 Sb07g028940 Sb01g049020 Sb01g010070 Sb10g003810
GO:0006996	P	organelle organization	5	130	1895	26245	0.96	0.97	Sb03g032530 Sb07g021630 Sb08g017750 Sb02g037780 Sb07g028940
GO:0016043	P	cellular component organization	7	130	3205	26245	1	1	Sb08g005190 Sb08g017750 Sb02g037780 Sb07g028940 Sb07g021630 Sb08g005200 Sb03g032530
GO:0042578	F	phosphoric ester hydrolase activity	16	130	507	26245	6.9e-09	1.5e-07	Sb09g026860 Sb03g040355 Sb09g022410 Sb09g029080 Sb08g005190 Sb01g010070 Sb03g029890 Sb03g026070 Sb06g001720 Sb03g039630 Sb09g030600 Sb02g022090 Sb01g039890 Sb08g005200 Sb03g032740 Sb09g002320
GO:0004721	F	phosphoprotein phosphatase activity	12	130	256	26245	9.4e-09	1.5e-07	Sb09g026860 Sb03g026070 Sb09g029080 Sb03g029890 Sb01g010070 Sb09g022410 Sb06g001720 Sb03g039630 Sb09g030600 Sb02g022090 Sb01g039890 Sb03g032740
GO:0016791	F	phosphatase activity	15	130	427	26245	5.3e-09	1.5e-07	Sb09g026860 Sb03g040355 Sb09g022410 Sb09g029080 Sb08g005190 Sb01g010070 Sb03g029890 Sb03g026070 Sb06g001720 Sb03g039630 Sb09g030600 Sb02g022090 Sb01g039890 Sb08g005200 Sb03g032740
GO:0004722	F	protein serinethreonine phosphatase activity	11	130	205	26245	1.1e-08	1.5e-07	Sb09g026860 Sb03g026070 Sb09g029080 Sb03g029890 Sb09g022410 Sb06g001720 Sb03g039630 Sb09g030600 Sb02g022090 Sb01g039890 Sb03g032740
GO:0043565	F	sequence-specific DNA binding	16	130	600	26245	6.7e-08	7.8e-07	Sb03g040970 Sb02g022280 Sb10g023010 Sb08g003760 Sb09g021580 Sb03g037740 Sb03g029920 Sb03g040510 Sb09g023920 Sb04g006970 Sb06g025710 Sb06g026410 Sb02g043620 Sb01g036810 Sb10g007090 Sb02g026570
GO:0016620	F	oxidoreductase activity, acting on the aldehyde or oxo group of donors, NAD or NADP as acceptor	8	130	104	26245	8.7e-08	8.4e-07	Sb01g005670 Sb08g004840 Sb03g039820 Sb05g005470 Sb07g021630 Sb02g025790 Sb02g005200 Sb09g022290
GO:0016903	F	oxidoreductase activity, acting on the aldehyde or oxo group of donors	8	130	145	26245	9.5e-07	7.9e-06	Sb01g005670 Sb08g004840 Sb03g039820 Sb05g005470 Sb07g021630 Sb02g025790 Sb02g005200 Sb09g022290
GO:0042277	F	peptide binding	5	130	76	26245	5.1e-05	0.00037	Sb02g038130 Sb02g003090 Sb01g005990 Sb02g022210 Sb10g022780
GO:0016614	F	oxidoreductase activity, acting on CH-OH group of donors	8	130	315	26245	0.00021	0.0011	Sb01g005670 Sb01g003880 Sb01g031520 Sb04g000320 Sb01g008730 Sb05g009350 Sb03g029570 Sb05g009360
GO:0016491	F	oxidoreductase activity	25	130	2349	26245	0.00022	0.0011	Sb01g038760 Sb08g004840 Sb05g005470 Sb02g025790 Sb04g021990 Sb04g004250 Sb05g001000 Sb01g008730 Sb03g029570 Sb05g009360 Sb07g022990 Sb01g003880 Sb10g027490 Sb01g005670 Sb07g021630 Sb02g005200 Sb06g018220 Sb01g031520 Sb03g039820 Sb0010s007790 Sb04g000320 Sb02g037780 Sb05g009350 Sb01g047540 Sb09g022290
GO:0003700	F	transcription factor activity	19	130	1522	26245	0.0002	0.0011	Sb03g040970 Sb02g022280 Sb10g023010 Sb08g003760 Sb09g021580 Sb03g037740 Sb02g025080 Sb03g029920 Sb03g040510 Sb09g023920 Sb04g006970 Sb06g025710 Sb06g026410 Sb01g030570 Sb02g043620 Sb01g036810 Sb01g049020 Sb10g007090 Sb02g026570
GO:0008194	F	UDP-glycosyltransferase activity	8	130	341	26245	0.00035	0.0017	Sb01g037090 Sb10g006330 Sb03g034680 Sb08g017750 Sb01g033060 Sb04g036240 Sb03g034880 Sb02g043450
GO:0035251	F	UDP-glucosyltransferase activity	5	130	157	26245	0.0013	0.0053	Sb08g017750 Sb01g033060 Sb03g034880 Sb10g006330 Sb03g034680
GO:0016788	F	hydrolase activity, acting on ester bonds	16	130	1360	26245	0.0012	0.0053	Sb09g026860 Sb03g040355 Sb09g022410 Sb09g029080 Sb08g005190 Sb01g010070 Sb03g029890 Sb03g026070 Sb06g001720 Sb03g039630 Sb09g030600 Sb02g022090 Sb01g039890 Sb08g005200 Sb03g032740 Sb09g002320
GO:0003682	F	chromatin binding	5	130	164	26245	0.0015	0.0059	Sb05g021820 Sb03g032530 Sb06g008585 Sb03g006450 Sb01g028870
GO:0046527	F	glucosyltransferase activity	5	130	183	26245	0.0024	0.0087	Sb08g017750 Sb01g033060 Sb03g034880 Sb10g006330 Sb03g034680
GO:0016616	F	oxidoreductase activity, acting on the CH-OH group of donors, NAD or NADP as acceptor	6	130	271	26245	0.0026	0.0087	Sb01g003880 Sb04g000320 Sb01g008730 Sb05g009350 Sb03g029570 Sb05g009360
GO:0016758	F	transferase activity, transferring hexosyl groups	9	130	595	26245	0.0031	0.01	Sb01g037090 Sb10g006330 Sb03g034680 Sb08g017750 Sb01g033060 Sb03g004540 Sb04g036240 Sb03g034880 Sb02g043450
GO:0030528	F	transcription regulator activity	20	130	2211	26245	0.0065	0.02	Sb03g040970 Sb02g022280 Sb10g023010 Sb08g003760 Sb09g021580 Sb03g037740 Sb02g025080 Sb03g029920 Sb03g040510 Sb09g023920 Sb04g006970 Sb06g025710 Sb06g026410 Sb01g030570 Sb02g043620 Sb01g036810 Sb01g049020 Sb01g010070 Sb10g007090 Sb02g026570
GO:0016684	F	oxidoreductase activity, acting on peroxide as acceptor	5	130	239	26245	0.0073	0.02	Sb01g038760 Sb04g004250 Sb0010s007790 Sb10g027490 Sb05g001000
GO:0004601	F	peroxidase activity	5	130	239	26245	0.0073	0.02	Sb01g038760 Sb04g004250 Sb0010s007790 Sb10g027490 Sb05g001000
GO:0016209	F	antioxidant activity	5	130	276	26245	0.013	0.033	Sb01g038760 Sb04g004250 Sb0010s007790 Sb10g027490 Sb05g001000
GO:0003677	F	DNA binding	25	130	3177	26245	0.013	0.033	Sb03g037740 Sb03g029920 Sb01g049020 Sb06g025710 Sb06g026410 Sb03g006450 Sb02g043620 Sb02g026570 Sb02g022280 Sb10g023010 Sb08g003760 Sb05g019540 Sb09g023920 Sb09g021580 Sb04g006970 Sb01g036810 Sb03g032530 Sb03g040970 Sb01g028870 Sb10g007090 Sb02g025080 Sb03g040510 Sb05g021820 Sb06g008585 Sb01g030570
GO:0016757	F	transferase activity, transferring glycosyl groups	9	130	768	26245	0.015	0.036	Sb01g037090 Sb10g006330 Sb03g034680 Sb08g017750 Sb01g033060 Sb03g004540 Sb04g036240 Sb03g034880 Sb02g043450
GO:0046872	F	metal ion binding	33	130	4609	26245	0.016	0.037	Sb01g038760 Sb09g029080 Sb06g001720 Sb07g007610 Sb10g026910 Sb09g030600 Sb02g005200 Sb04g004250 Sb03g026070 Sb03g029890 Sb05g001000 Sb01g039740 Sb01g008730 Sb03g029570 Sb05g009360 Sb02g030690 Sb07g022990 Sb10g027490 Sb01g048440 Sb10g025470 Sb01g039890 Sb03g032740 Sb09g002320 Sb03g034680 Sb01g005670 Sb01g031520 Sb01g028750 Sb02g037780 Sb03g039630 Sb01g017050 Sb02g022090 Sb05g009350 Sb06g031240
GO:0043169	F	cation binding	34	130	4835	26245	0.019	0.042	Sb01g038760 Sb09g029080 Sb06g001720 Sb07g007610 Sb10g026910 Sb09g030600 Sb02g005200 Sb04g004250 Sb03g026070 Sb03g029890 Sb05g001000 Sb01g039740 Sb01g008730 Sb03g029570 Sb05g009360 Sb02g030690 Sb07g022990 Sb10g027490 Sb01g048440 Sb10g025470 Sb01g039890 Sb03g032740 Sb09g002320 Sb03g034680 Sb01g005670 Sb01g031520 Sb09g022410 Sb01g028750 Sb02g037780 Sb03g039630 Sb01g017050 Sb02g022090 Sb05g009350 Sb0…
GO:0043167	F	ion binding	34	130	4862	26245	0.02	0.043	Sb01g038760 Sb09g029080 Sb06g001720 Sb07g007610 Sb10g026910 Sb09g030600 Sb02g005200 Sb04g004250 Sb03g026070 Sb03g029890 Sb05g001000 Sb01g039740 Sb01g008730 Sb03g029570 Sb05g009360 Sb02g030690 Sb07g022990 Sb10g027490 Sb01g048440 Sb10g025470 Sb01g039890 Sb03g032740 Sb09g002320 Sb03g034680 Sb01g005670 Sb01g031520 Sb09g022410 Sb01g028750 Sb02g037780 Sb03g039630 Sb01g017050 Sb02g022090 Sb05g009350 Sb0…
GO:0003824	F	catalytic activity	79	130	13636	26245	0.027	0.056	Sb01g038760 Sb08g019700 Sb09g022410 Sb04g002790 Sb08g004840 Sb01g019850 Sb01g033570 Sb06g001720 Sb03g035220 Sb02g028770 Sb09g029080 Sb07g007610 Sb10g026910 Sb06g033990 Sb09g030600 Sb03g032740 Sb10g003810 Sb04g004250 Sb04g004690 Sb01g035380 Sb09g021410 Sb03g029890 Sb05g001000 Sb05g014470 Sb03g039630 Sb01g007120 Sb01g033060 Sb04g022410 Sb01g039740 Sb01g008730 Sb03g004540 Sb05g005470 Sb01g031870 Sb0…
GO:0048037	F	cofactor binding	8	130	792	26245	0.045	0.089	Sb01g035380 Sb01g005670 Sb01g031520 Sb03g039820 Sb04g000320 Sb03g035220 Sb10g026910 Sb09g022290
GO:0050662	F	coenzyme binding	6	130	589	26245	0.075	0.14	Sb01g035380 Sb01g005670 Sb01g031520 Sb03g039820 Sb04g000320 Sb09g022290
GO:0016301	F	kinase activity	15	130	2152	26245	0.11	0.21	Sb04g004690 Sb08g019700 Sb04g002790 Sb09g021410 Sb01g038750 Sb03g039820 Sb01g033570 Sb01g007120 Sb02g039640 Sb04g022410 Sb04g030950 Sb06g033990 Sb09g022290 Sb01g010070 Sb10g003810
GO:0004553	F	hydrolase activity, hydrolyzing O-glycosyl compounds	5	130	543	26245	0.13	0.24	Sb03g004540 Sb01g019850 Sb03g030100 Sb01g047500 Sb02g028770
GO:0005506	F	iron ion binding	7	130	890	26245	0.16	0.27	Sb01g038760 Sb04g004250 Sb01g005670 Sb10g027490 Sb01g031520 Sb05g001000 Sb07g022990
GO:0016798	F	hydrolase activity, acting on glycosyl bonds	5	130	595	26245	0.18	0.3	Sb03g004540 Sb01g019850 Sb03g030100 Sb01g047500 Sb02g028770
GO:0030554	F	adenyl nucleotide binding	21	130	3444	26245	0.18	0.3	Sb08g019700 Sb01g005670 Sb04g002790 Sb09g021410 Sb01g031520 Sb01g048440 Sb10g025470 Sb01g010070 Sb01g017050 Sb01g007120 Sb02g039640 Sb04g022410 Sb07g028940 Sb01g033570 Sb04g030950 Sb06g033990 Sb07g007610 Sb05g027870 Sb06g031240 Sb10g003810 Sb01g038750
GO:0001883	F	purine nucleoside binding	21	130	3449	26245	0.19	0.3	Sb08g019700 Sb01g005670 Sb04g002790 Sb09g021410 Sb01g031520 Sb01g048440 Sb10g025470 Sb01g010070 Sb01g017050 Sb01g007120 Sb02g039640 Sb04g022410 Sb07g028940 Sb01g033570 Sb04g030950 Sb06g033990 Sb07g007610 Sb05g027870 Sb06g031240 Sb10g003810 Sb01g038750
GO:0001882	F	nucleoside binding	21	130	3471	26245	0.19	0.3	Sb08g019700 Sb01g005670 Sb04g002790 Sb09g021410 Sb01g031520 Sb01g048440 Sb10g025470 Sb01g010070 Sb01g017050 Sb01g007120 Sb02g039640 Sb04g022410 Sb07g028940 Sb01g033570 Sb04g030950 Sb06g033990 Sb07g007610 Sb05g027870 Sb06g031240 Sb10g003810 Sb01g038750
GO:0020037	F	heme binding	5	130	626	26245	0.2	0.31	Sb01g038760 Sb04g004250 Sb10g027490 Sb07g022990 Sb05g001000
GO:0046983	F	protein dimerization activity	5	130	684	26245	0.25	0.34	Sb01g035380 Sb01g029220 Sb03g006060 Sb01g030570 Sb01g049020
GO:0046906	F	tetrapyrrole binding	5	130	669	26245	0.24	0.34	Sb01g038760 Sb04g004250 Sb10g027490 Sb07g022990 Sb05g001000
GO:0005524	F	ATP binding	19	130	3197	26245	0.23	0.34	Sb08g019700 Sb04g002790 Sb09g021410 Sb01g038750 Sb01g048440 Sb10g025470 Sb01g010070 Sb01g017050 Sb01g007120 Sb02g039640 Sb04g022410 Sb07g028940 Sb01g033570 Sb04g030950 Sb06g033990 Sb07g007610 Sb05g027870 Sb06g031240 Sb10g003810
GO:0016773	F	phosphotransferase activity, alcohol group as acceptor	12	130	1936	26245	0.25	0.34	Sb08g019700 Sb04g002790 Sb09g021410 Sb01g038750 Sb01g010070 Sb01g033570 Sb01g007120 Sb02g039640 Sb04g022410 Sb04g030950 Sb06g033990 Sb10g003810
GO:0032559	F	adenyl ribonucleotide binding	19	130	3226	26245	0.25	0.34	Sb08g019700 Sb04g002790 Sb09g021410 Sb01g038750 Sb01g048440 Sb10g025470 Sb01g010070 Sb01g017050 Sb01g007120 Sb02g039640 Sb04g022410 Sb07g028940 Sb01g033570 Sb04g030950 Sb06g033990 Sb07g007610 Sb05g027870 Sb06g031240 Sb10g003810
GO:0017076	F	purine nucleotide binding	21	130	3720	26245	0.29	0.38	Sb08g019700 Sb01g005670 Sb04g002790 Sb09g021410 Sb01g031520 Sb01g048440 Sb10g025470 Sb01g010070 Sb01g017050 Sb01g007120 Sb02g039640 Sb04g022410 Sb07g028940 Sb01g033570 Sb04g030950 Sb06g033990 Sb07g007610 Sb05g027870 Sb06g031240 Sb10g003810 Sb01g038750
GO:0016787	F	hydrolase activity	26	130	4724	26245	0.31	0.38	Sb09g029080 Sb01g019850 Sb06g001720 Sb02g028770 Sb07g007610 Sb09g026860 Sb03g026070 Sb01g048440 Sb05g014470 Sb09g030600 Sb03g004540 Sb03g040355 Sb03g029890 Sb10g025470 Sb01g039890 Sb08g005200 Sb03g032740 Sb09g002320 Sb03g030100 Sb08g005190 Sb01g010070 Sb09g022410 Sb03g039630 Sb02g022090 Sb01g047500 Sb06g031240
GO:0005488	F	binding	92	130	17935	26245	0.31	0.38	Sb06g001720 Sb06g025710 Sb02g043620 Sb06g033990 Sb10g003810 Sb02g026570 Sb01g035380 Sb09g021410 Sb08g003760 Sb09g023920 Sb01g008730 Sb02g003090 Sb03g040355 Sb01g003880 Sb10g027490 Sb10g025470 Sb04g006970 Sb03g039820 Sb03g032530 Sb02g005200 Sb03g006060 Sb01g031520 Sb04g000320 Sb02g037780 Sb03g040510 Sb06g031240 Sb01g038760 Sb03g029920 Sb01g049020 Sb01g030570 Sb03g026070 Sb10g023010 Sb01g048440 Sb0…
GO:0004674	F	protein serinethreonine kinase activity	9	130	1460	26245	0.3	0.38	Sb08g019700 Sb09g021410 Sb01g038750 Sb01g033570 Sb01g007120 Sb02g039640 Sb04g022410 Sb06g033990 Sb10g003810
GO:0004672	F	protein kinase activity	10	130	1731	26245	0.36	0.41	Sb08g019700 Sb09g021410 Sb01g038750 Sb01g010070 Sb01g033570 Sb01g007120 Sb02g039640 Sb04g022410 Sb06g033990 Sb10g003810
GO:0016772	F	transferase activity, transferring phosphorus-containing groups	15	130	2705	26245	0.36	0.41	Sb04g004690 Sb08g019700 Sb04g002790 Sb09g021410 Sb01g038750 Sb03g039820 Sb01g033570 Sb01g007120 Sb02g039640 Sb04g022410 Sb04g030950 Sb06g033990 Sb09g022290 Sb01g010070 Sb10g003810
GO:0032555	F	purine ribonucleotide binding	19	130	3495	26245	0.37	0.41	Sb08g019700 Sb04g002790 Sb09g021410 Sb01g038750 Sb01g048440 Sb10g025470 Sb01g010070 Sb01g017050 Sb01g007120 Sb02g039640 Sb04g022410 Sb07g028940 Sb01g033570 Sb04g030950 Sb06g033990 Sb07g007610 Sb05g027870 Sb06g031240 Sb10g003810
GO:0032553	F	ribonucleotide binding	19	130	3495	26245	0.37	0.41	Sb08g019700 Sb04g002790 Sb09g021410 Sb01g038750 Sb01g048440 Sb10g025470 Sb01g010070 Sb01g017050 Sb01g007120 Sb02g039640 Sb04g022410 Sb07g028940 Sb01g033570 Sb04g030950 Sb06g033990 Sb07g007610 Sb05g027870 Sb06g031240 Sb10g003810
GO:0000166	F	nucleotide binding	25	130	4630	26245	0.35	0.41	Sb08g019700 Sb04g002790 Sb01g033570 Sb01g017050 Sb07g007610 Sb06g033990 Sb10g003810 Sb09g021410 Sb01g007120 Sb04g022410 Sb04g030950 Sb01g003880 Sb01g038750 Sb01g048440 Sb10g025470 Sb07g028940 Sb05g027870 Sb01g005670 Sb01g031520 Sb03g039820 Sb04g000320 Sb02g039640 Sb06g031240 Sb09g022290 Sb01g010070
GO:0016740	F	transferase activity	27	130	5115	26245	0.39	0.43	Sb08g019700 Sb04g002790 Sb01g033570 Sb10g026910 Sb06g033990 Sb10g003810 Sb04g004690 Sb09g021410 Sb03g034680 Sb01g007120 Sb04g022410 Sb03g004540 Sb04g030950 Sb03g034880 Sb01g038750 Sb03g035220 Sb04g036240 Sb10g006330 Sb01g037090 Sb03g006060 Sb01g010070 Sb03g039820 Sb08g017750 Sb02g039640 Sb01g033060 Sb09g022290 Sb02g043450
GO:0046914	F	transition metal ion binding	18	130	3395	26245	0.42	0.45	Sb01g038760 Sb04g004250 Sb01g005670 Sb10g027490 Sb01g031520 Sb05g001000 Sb02g037780 Sb01g017050 Sb01g039740 Sb01g008730 Sb05g009350 Sb03g029570 Sb10g026910 Sb02g005200 Sb05g009360 Sb02g030690 Sb07g022990 Sb03g034680
GO:0003676	F	nucleic acid binding	26	130	5538	26245	0.65	0.69	Sb03g037740 Sb03g029920 Sb01g049020 Sb06g025710 Sb06g026410 Sb03g006450 Sb02g043620 Sb02g026570 Sb02g022280 Sb10g023010 Sb08g003760 Sb05g019540 Sb09g023920 Sb03g040355 Sb09g021580 Sb04g006970 Sb01g036810 Sb03g032530 Sb03g040970 Sb01g028870 Sb10g007090 Sb02g025080 Sb03g040510 Sb05g021820 Sb06g008585 Sb01g030570
GO:0008270	F	zinc ion binding	7	130	2206	26245	0.93	0.96	Sb03g034680 Sb01g017050 Sb01g039740 Sb01g008730 Sb05g009350 Sb05g009360 Sb02g030690
GO:0005215	F	transporter activity	5	130	1944	26245	0.97	0.98	Sb10g025470 Sb01g011020 Sb07g007610 Sb06g031240 Sb01g048440
GO:0005515	F	protein binding	19	130	6698	26245	1	1	Sb01g017050 Sb01g035380 Sb06g018220 Sb10g022780 Sb03g006060 Sb01g010070 Sb01g005990 Sb05g019540 Sb01g049020 Sb02g003090 Sb01g039740 Sb03g045860 Sb02g038130 Sb10g023010 Sb07g028940 Sb01g029220 Sb09g002320 Sb02g022210 Sb01g030570
GO:0009570	C	chloroplast stroma	10	130	142	26245	4.4e-09	1.6e-07	Sb01g038760 Sb08g005190 Sb01g005990 Sb07g028940 Sb02g003090 Sb01g031870 Sb08g005200 Sb02g038130 Sb10g022780 Sb02g022210
GO:0009532	C	plastid stroma	10	130	191	26245	6.4e-08	1.2e-06	Sb01g038760 Sb08g005190 Sb01g005990 Sb07g028940 Sb02g003090 Sb01g031870 Sb08g005200 Sb02g038130 Sb10g022780 Sb02g022210
GO:0005886	C	plasma membrane	25	130	1557	26245	2e-07	2.5e-06	Sb01g038760 Sb09g003060 Sb01g005990 Sb02g028770 Sb07g007610 Sb02g038130 Sb02g008820 Sb01g008730 Sb02g003090 Sb03g034880 Sb05g009360 Sb01g048440 Sb10g025470 Sb07g028940 Sb09g002320 Sb10g006330 Sb0010s007790 Sb01g028750 Sb05g009350 Sb01g033060 Sb01g031870 Sb01g047540 Sb10g022780 Sb06g031240 Sb02g022210
GO:0048046	C	apoplast	8	130	191	26245	6.7e-06	6.2e-05	Sb05g027870 Sb05g001000 Sb01g005990 Sb02g003090 Sb03g029570 Sb02g038130 Sb10g022780 Sb02g022210
GO:0005773	C	vacuole	11	130	413	26245	8.5e-06	6.3e-05	Sb10g006330 Sb08g004840 Sb01g048440 Sb10g025470 Sb01g017050 Sb07g028940 Sb05g005470 Sb01g033060 Sb07g007610 Sb01g047540 Sb06g031240
GO:0044434	C	chloroplast part	13	130	729	26245	7.9e-05	0.00049	Sb01g038760 Sb08g005190 Sb01g005990 Sb07g028940 Sb02g003090 Sb04g036240 Sb01g031870 Sb08g005200 Sb02g038130 Sb05g027870 Sb10g022780 Sb09g028710 Sb02g022210
GO:0044435	C	plastid part	13	130	793	26245	0.00018	0.00095	Sb01g038760 Sb08g005190 Sb01g005990 Sb07g028940 Sb02g003090 Sb04g036240 Sb01g031870 Sb08g005200 Sb02g038130 Sb05g027870 Sb10g022780 Sb09g028710 Sb02g022210
GO:0009507	C	chloroplast	20	130	1831	26245	0.00074	0.0034	Sb01g038760 Sb06g018220 Sb10g022780 Sb08g005190 Sb08g004840 Sb03g039820 Sb03g004540 Sb05g005470 Sb01g005990 Sb07g028940 Sb02g003090 Sb04g036240 Sb01g031870 Sb08g005200 Sb03g029570 Sb02g038130 Sb05g027870 Sb09g022290 Sb09g028710 Sb02g022210
GO:0009941	C	chloroplast envelope	5	130	167	26245	0.0017	0.0068	Sb05g027870 Sb04g036240 Sb01g031870 Sb09g028710 Sb07g028940
GO:0009526	C	plastid envelope	5	130	193	26245	0.003	0.011	Sb05g027870 Sb04g036240 Sb01g031870 Sb09g028710 Sb07g028940
GO:0016020	C	membrane	42	130	5733	26245	0.0038	0.012	Sb01g038760 Sb08g004840 Sb05g005470 Sb09g003060 Sb01g005990 Sb02g028770 Sb07g007610 Sb02g038130 Sb03g032290 Sb05g027870 Sb03g034680 Sb02g008820 Sb01g008730 Sb02g003090 Sb01g011020 Sb03g029570 Sb01g038670 Sb03g034880 Sb05g009360 Sb01g048440 Sb10g025470 Sb07g028940 Sb04g036240 Sb09g002320 Sb06g018220 Sb10g022780 Sb10g006330 Sb01g010070 Sb03g039820 Sb0010s007790 Sb01g028750 Sb08g017750 Sb02g037780 S…
GO:0009536	C	plastid	20	130	2109	26245	0.0039	0.012	Sb01g038760 Sb06g018220 Sb10g022780 Sb08g005190 Sb08g004840 Sb03g039820 Sb03g004540 Sb05g005470 Sb01g005990 Sb07g028940 Sb02g003090 Sb04g036240 Sb01g031870 Sb08g005200 Sb03g029570 Sb02g038130 Sb05g027870 Sb09g022290 Sb09g028710 Sb02g022210
GO:0005618	C	cell wall	8	130	669	26245	0.019	0.054	Sb01g038760 Sb04g004250 Sb05g027870 Sb03g034680 Sb05g001000 Sb01g017050 Sb03g029570 Sb10g027490
GO:0030312	C	external encapsulating structure	8	130	705	26245	0.025	0.066	Sb01g038760 Sb04g004250 Sb05g027870 Sb03g034680 Sb05g001000 Sb01g017050 Sb03g029570 Sb10g027490
GO:0005576	C	extracellular region	8	130	763	26245	0.037	0.086	Sb05g027870 Sb05g001000 Sb01g005990 Sb02g003090 Sb03g029570 Sb02g038130 Sb10g022780 Sb02g022210
GO:0044444	C	cytoplasmic part	48	130	7660	26245	0.035	0.086	Sb01g038760 Sb08g019700 Sb04g002790 Sb08g004840 Sb01g019850 Sb01g033570 Sb09g003060 Sb01g005990 Sb01g017050 Sb07g007610 Sb02g025790 Sb02g038130 Sb10g003810 Sb03g032290 Sb01g035380 Sb05g027870 Sb02g003090 Sb01g007120 Sb01g008730 Sb03g004540 Sb05g005470 Sb03g029570 Sb05g009360 Sb01g003880 Sb01g048440 Sb10g025470 Sb07g028940 Sb04g036240 Sb08g005200 Sb08g005190 Sb02g005200 Sb06g018220 Sb10g022780 Sb1…
GO:0005829	C	cytosol	14	130	1740	26245	0.051	0.11	Sb08g019700 Sb01g035380 Sb01g003880 Sb02g025790 Sb01g019850 Sb01g033570 Sb0010s007790 Sb01g007120 Sb02g039640 Sb01g008730 Sb05g009350 Sb04g002790 Sb01g047500 Sb05g009360
GO:0005737	C	cytoplasm	51	130	9051	26245	0.15	0.31	Sb01g038760 Sb08g019700 Sb04g002790 Sb08g004840 Sb01g019850 Sb01g033570 Sb09g003060 Sb01g005990 Sb01g017050 Sb07g007610 Sb02g025790 Sb02g038130 Sb10g003810 Sb03g032290 Sb01g035380 Sb05g027870 Sb02g003090 Sb01g007120 Sb01g008730 Sb03g004540 Sb05g005470 Sb03g029570 Sb05g009360 Sb04g004250 Sb01g003880 Sb10g027490 Sb01g048440 Sb10g025470 Sb07g028940 Sb04g036240 Sb08g005200 Sb10g006330 Sb02g005200 Sb0…
GO:0031967	C	organelle envelope	6	130	761	26245	0.18	0.32	Sb05g027870 Sb02g037780 Sb07g028940 Sb04g036240 Sb01g031870 Sb09g028710
GO:0043231	C	intracellular membrane-bounded organelle	57	130	10385	26245	0.18	0.32	Sb01g038760 Sb08g019700 Sb08g004840 Sb01g019850 Sb01g033570 Sb09g003060 Sb01g005990 Sb01g049020 Sb06g025710 Sb07g007610 Sb01g030570 Sb02g038130 Sb10g003810 Sb04g004250 Sb01g035380 Sb10g023010 Sb02g003090 Sb05g019540 Sb01g017050 Sb01g007120 Sb01g033060 Sb04g022410 Sb09g030600 Sb03g004540 Sb05g005470 Sb01g031870 Sb01g047540 Sb03g029570 Sb10g027490 Sb08g005190 Sb01g048440 Sb03g026070 Sb10g025470 Sb0…
GO:0043227	C	membrane-bounded organelle	57	130	10406	26245	0.19	0.32	Sb01g038760 Sb08g019700 Sb08g004840 Sb01g019850 Sb01g033570 Sb09g003060 Sb01g005990 Sb01g049020 Sb06g025710 Sb07g007610 Sb01g030570 Sb02g038130 Sb10g003810 Sb04g004250 Sb01g035380 Sb10g023010 Sb02g003090 Sb05g019540 Sb01g017050 Sb01g007120 Sb01g033060 Sb04g022410 Sb09g030600 Sb03g004540 Sb05g005470 Sb01g031870 Sb01g047540 Sb03g029570 Sb10g027490 Sb08g005190 Sb01g048440 Sb03g026070 Sb10g025470 Sb0…
GO:0031975	C	envelope	6	130	780	26245	0.19	0.32	Sb05g027870 Sb02g037780 Sb07g028940 Sb04g036240 Sb01g031870 Sb09g028710
GO:0005634	C	nucleus	29	130	5080	26245	0.23	0.37	Sb08g019700 Sb01g019850 Sb01g033570 Sb01g049020 Sb06g025710 Sb07g007610 Sb01g030570 Sb04g004250 Sb03g026070 Sb10g023010 Sb01g007120 Sb05g019540 Sb04g022410 Sb09g030600 Sb10g027490 Sb01g048440 Sb10g025470 Sb04g006970 Sb08g005200 Sb03g032530 Sb05g027870 Sb08g005190 Sb02g039640 Sb02g025080 Sb03g040510 Sb09g006700 Sb01g047500 Sb06g008585 Sb06g031240
GO:0005622	C	intracellular	70	130	13212	26245	0.24	0.37	Sb01g038760 Sb08g019700 Sb04g002790 Sb08g004840 Sb01g019850 Sb01g033570 Sb09g003060 Sb01g005990 Sb01g049020 Sb06g025710 Sb07g007610 Sb01g030570 Sb10g026910 Sb02g038130 Sb10g003810 Sb04g004250 Sb03g032290 Sb01g035380 Sb10g023010 Sb03g004540 Sb05g019540 Sb01g017050 Sb01g007120 Sb01g033060 Sb04g022410 Sb09g030600 Sb01g008730 Sb02g003090 Sb05g005470 Sb01g031870 Sb01g047540 Sb03g029570 Sb05g009360 Sb0…
GO:0044424	C	intracellular part	67	130	12750	26245	0.28	0.41	Sb01g038760 Sb08g019700 Sb04g002790 Sb08g004840 Sb01g019850 Sb01g033570 Sb09g003060 Sb01g005990 Sb01g049020 Sb06g025710 Sb07g007610 Sb01g030570 Sb02g025790 Sb02g038130 Sb10g003810 Sb03g032290 Sb01g035380 Sb10g023010 Sb03g004540 Sb05g019540 Sb01g017050 Sb01g007120 Sb01g033060 Sb04g022410 Sb09g030600 Sb01g008730 Sb02g003090 Sb05g005470 Sb01g031870 Sb01g047540 Sb03g029570 Sb05g009360 Sb03g006060 Sb0…
GO:0043229	C	intracellular organelle	57	130	11218	26245	0.43	0.6	Sb01g038760 Sb08g019700 Sb08g004840 Sb01g019850 Sb01g033570 Sb09g003060 Sb01g005990 Sb01g049020 Sb06g025710 Sb07g007610 Sb01g030570 Sb02g038130 Sb10g003810 Sb04g004250 Sb01g035380 Sb10g023010 Sb02g003090 Sb05g019540 Sb01g017050 Sb01g007120 Sb01g033060 Sb04g022410 Sb09g030600 Sb03g004540 Sb05g005470 Sb01g031870 Sb01g047540 Sb03g029570 Sb10g027490 Sb08g005190 Sb01g048440 Sb03g026070 Sb10g025470 Sb0…
GO:0043226	C	organelle	57	130	11232	26245	0.44	0.6	Sb01g038760 Sb08g019700 Sb08g004840 Sb01g019850 Sb01g033570 Sb09g003060 Sb01g005990 Sb01g049020 Sb06g025710 Sb07g007610 Sb01g030570 Sb02g038130 Sb10g003810 Sb04g004250 Sb01g035380 Sb10g023010 Sb02g003090 Sb05g019540 Sb01g017050 Sb01g007120 Sb01g033060 Sb04g022410 Sb09g030600 Sb03g004540 Sb05g005470 Sb01g031870 Sb01g047540 Sb03g029570 Sb10g027490 Sb08g005190 Sb01g048440 Sb03g026070 Sb10g025470 Sb0…
GO:0016021	C	integral to membrane	9	130	1924	26245	0.62	0.82	Sb03g034680 Sb01g048440 Sb10g025470 Sb09g003060 Sb07g007610 Sb08g017750 Sb01g038670 Sb09g028710 Sb06g031240
GO:0031090	C	organelle membrane	8	130	1762	26245	0.65	0.83	Sb05g027870 Sb02g037780 Sb01g017050 Sb07g028940 Sb04g036240 Sb01g031870 Sb01g047540 Sb09g028710
GO:0005623	C	cell	79	130	16988	26245	0.85	0.9	Sb01g038760 Sb08g019700 Sb04g002790 Sb08g004840 Sb01g019850 Sb01g033570 Sb09g003060 Sb01g005990 Sb02g028770 Sb05g005470 Sb06g025710 Sb07g007610 Sb01g030570 Sb10g026910 Sb02g038130 Sb09g030600 Sb02g008820 Sb10g003810 Sb04g004250 Sb03g032290 Sb01g035380 Sb10g023010 Sb03g034680 Sb03g004540 Sb05g001000 Sb01g017050 Sb01g007120 Sb01g033060 Sb04g022410 Sb01g039740 Sb01g008730 Sb02g003090 Sb01g011020 Sb0…
GO:0044422	C	organelle part	20	130	4830	26245	0.84	0.9	Sb01g038760 Sb01g035380 Sb10g023010 Sb08g005190 Sb02g037780 Sb01g005990 Sb01g017050 Sb05g027870 Sb07g028940 Sb02g003090 Sb04g036240 Sb01g031870 Sb08g005200 Sb02g022210 Sb02g038130 Sb03g032530 Sb01g047540 Sb10g022780 Sb09g028710 Sb10g003810
GO:0044464	C	cell part	79	130	16988	26245	0.85	0.9	Sb01g038760 Sb08g019700 Sb04g002790 Sb08g004840 Sb01g019850 Sb01g033570 Sb09g003060 Sb01g005990 Sb02g028770 Sb05g005470 Sb06g025710 Sb07g007610 Sb01g030570 Sb10g026910 Sb02g038130 Sb09g030600 Sb02g008820 Sb10g003810 Sb04g004250 Sb03g032290 Sb01g035380 Sb10g023010 Sb03g034680 Sb03g004540 Sb05g001000 Sb01g017050 Sb01g007120 Sb01g033060 Sb04g022410 Sb01g039740 Sb01g008730 Sb02g003090 Sb01g011020 Sb0…
GO:0044446	C	intracellular organelle part	20	130	4811	26245	0.84	0.9	Sb01g038760 Sb01g035380 Sb10g023010 Sb08g005190 Sb02g037780 Sb01g005990 Sb01g017050 Sb05g027870 Sb07g028940 Sb02g003090 Sb04g036240 Sb01g031870 Sb08g005200 Sb02g022210 Sb02g038130 Sb03g032530 Sb01g047540 Sb10g022780 Sb09g028710 Sb10g003810
GO:0031224	C	intrinsic to membrane	9	130	2233	26245	0.78	0.9	Sb03g034680 Sb01g048440 Sb10g025470 Sb09g003060 Sb07g007610 Sb08g017750 Sb01g038670 Sb09g028710 Sb06g031240
GO:0044425	C	membrane part	13	130	3110	26245	0.78	0.9	Sb03g032290 Sb03g034680 Sb01g048440 Sb10g025470 Sb09g003060 Sb02g037780 Sb01g047540 Sb07g007610 Sb08g017750 Sb01g038670 Sb03g034880 Sb09g028710 Sb06g031240
GO:0005739	C	mitochondrion	5	130	1853	26245	0.96	0.98	Sb01g017050 Sb02g005200 Sb07g028940 Sb02g037780 Sb03g029570
GO:0032991	C	macromolecular complex	5	130	3322	26245	1	1	Sb03g032290 Sb03g032530 Sb02g037780 Sb03g034880 Sb03g006060

## Sheet: Enriched entries, FDR < 0.05
Table S2. The GO-terms and associated accessions enriched for drought and related stresses
GO_acc	term_type	Term	queryitem	querytotal	bgitem	bgtotal	pvalue	FDR	entries
GO:0009415	P	response to water	58	130	393	26245	1.2e-67	2.5e-65	Sb08g019700 Sb08g004840 Sb01g019850 Sb05g005470 Sb09g003060 Sb01g005990 Sb02g028770 Sb07g007610 Sb10g026910 Sb02g038130 Sb09g030600 Sb04g004250 Sb03g006060 Sb10g023010 Sb03g034680 Sb02g003090 Sb01g007120 Sb01g033060 Sb01g039740 Sb03g004540 Sb01g047540 Sb02g025790 Sb07g022990 Sb07g024160 Sb01g003880 Sb10g027490 Sb01g048440 Sb03g026070 Sb10g025470 Sb04g006970 Sb01g039890 Sb04g036240 Sb08g005200 Sb0…
GO:0009414	P	response to water deprivation	56	130	374	26245	1.9e-65	2e-63	Sb08g019700 Sb08g004840 Sb01g019850 Sb05g005470 Sb09g003060 Sb01g005990 Sb02g028770 Sb07g007610 Sb10g026910 Sb02g038130 Sb09g030600 Sb04g004250 Sb03g026070 Sb10g023010 Sb03g034680 Sb02g003090 Sb01g007120 Sb01g039740 Sb03g004540 Sb01g047540 Sb02g025790 Sb07g022990 Sb07g024160 Sb01g003880 Sb10g027490 Sb01g048440 Sb10g025470 Sb04g006970 Sb01g039890 Sb04g036240 Sb08g005200 Sb03g006060 Sb10g022780 Sb0…
GO:0009628	P	response to abiotic stimulus	75	130	2423	26245	6.6e-43	4.7e-41	Sb01g038760 Sb08g019700 Sb04g002790 Sb08g004840 Sb01g019850 Sb01g033570 Sb09g003060 Sb01g005990 Sb01g049020 Sb06g025710 Sb07g007610 Sb10g026910 Sb02g038130 Sb09g030600 Sb02g008820 Sb10g003810 Sb04g004250 Sb03g026070 Sb10g023010 Sb03g034680 Sb03g004540 Sb10g022780 Sb01g007120 Sb01g033060 Sb04g022410 Sb01g039740 Sb01g008730 Sb02g003090 Sb05g005470 Sb01g047540 Sb03g029570 Sb02g025790 Sb05g009360 Sb0…
GO:0042221	P	response to chemical stimulus	80	130	3244	26245	2.1e-39	1.1e-37	Sb01g038760 Sb08g019700 Sb08g004840 Sb01g019850 Sb05g005470 Sb06g001720 Sb01g005990 Sb02g028770 Sb07g007610 Sb10g026910 Sb03g038600 Sb02g038130 Sb10g022200 Sb09g030600 Sb02g008820 Sb10g003810 Sb04g004250 Sb03g026070 Sb10g023010 Sb03g034680 Sb03g004540 Sb05g001000 Sb01g007120 Sb01g033060 Sb01g039740 Sb01g008730 Sb02g003090 Sb01g031870 Sb01g047540 Sb04g021990 Sb02g025790 Sb09g003060 Sb05g009360 Sb0…
GO:0006970	P	response to osmotic stress	43	130	631	26245	5.6e-36	2.4e-34	Sb01g038760 Sb08g019700 Sb04g002790 Sb08g004840 Sb01g033570 Sb09g003060 Sb02g028770 Sb10g026910 Sb09g030600 Sb10g003810 Sb04g004250 Sb03g026070 Sb03g034680 Sb01g007120 Sb01g033060 Sb04g022410 Sb01g039740 Sb01g008730 Sb05g005470 Sb03g029570 Sb05g009360 Sb03g040355 Sb10g027490 Sb01g038750 Sb02g025790 Sb10g002070 Sb07g028940 Sb04g036240 Sb08g005200 Sb10g006330 Sb09g002320 Sb03g030100 Sb08g005190 Sb0…
GO:0006950	P	response to stress	80	130	3705	26245	2.8e-35	1e-33	Sb01g038760 Sb08g019700 Sb04g002790 Sb08g004840 Sb01g019850 Sb01g033570 Sb09g003060 Sb01g005990 Sb02g028770 Sb06g025710 Sb07g007610 Sb10g026910 Sb02g038130 Sb10g022780 Sb09g030600 Sb02g008820 Sb10g003810 Sb04g004250 Sb01g035380 Sb10g023010 Sb03g034680 Sb03g004540 Sb05g001000 Sb01g007120 Sb01g033060 Sb04g022410 Sb01g039740 Sb01g008730 Sb02g003090 Sb05g005470 Sb01g031870 Sb01g047540 Sb04g021990 Sb0…
GO:0009737	P	response to abscisic acid stimulus	40	130	664	26245	2.1e-31	6.5e-30	Sb08g019700 Sb08g004840 Sb05g005470 Sb06g001720 Sb07g007610 Sb10g026910 Sb03g038600 Sb01g028330 Sb09g030600 Sb10g022200 Sb03g026070 Sb10g023010 Sb01g007120 Sb01g039740 Sb03g004540 Sb10g003810 Sb09g003060 Sb01g038150 Sb02g025790 Sb01g048440 Sb10g025470 Sb10g002070 Sb01g039890 Sb08g005200 Sb08g005190 Sb09g002320 Sb03g006060 Sb09g023180 Sb03g039820 Sb0010s007790 Sb03g039630 Sb02g025080 Sb02g022090 S…
GO:0009651	P	response to salt stress	36	130	536	26245	1e-29	2.7e-28	Sb01g038760 Sb08g019700 Sb04g002790 Sb08g004840 Sb01g033570 Sb09g003060 Sb02g028770 Sb10g026910 Sb10g003810 Sb04g004250 Sb01g007120 Sb04g022410 Sb09g002320 Sb01g008730 Sb05g005470 Sb03g029570 Sb05g009360 Sb10g027490 Sb02g025790 Sb10g002070 Sb07g028940 Sb04g036240 Sb08g005200 Sb01g039740 Sb03g030100 Sb08g005190 Sb03g039820 Sb01g028750 Sb08g017750 Sb02g037780 Sb02g039640 Sb02g025080 Sb05g009350 Sb0…
GO:0050896	P	response to stimulus	88	130	6230	26245	5.1e-26	1.2e-24	Sb08g004840 Sb06g001720 Sb02g028770 Sb06g025710 Sb10g022200 Sb01g035380 Sb01g008730 Sb02g003090 Sb01g038150 Sb03g040355 Sb01g003880 Sb10g027490 Sb10g025470 Sb10g002070 Sb04g006970 Sb02g005200 Sb03g006060 Sb03g039820 Sb02g037780 Sb03g040510 Sb10g006330 Sb09g028710 Sb06g031240 Sb01g038760 Sb01g049020 Sb04g021990 Sb03g026070 Sb10g023010 Sb03g034680 Sb03g004540 Sb10g003810 Sb05g009360 Sb07g022990 Sb0…
GO:0009266	P	response to temperature stimulus	38	130	902	26245	2e-24	4.2e-23	Sb01g038760 Sb09g003060 Sb01g005990 Sb02g028770 Sb06g025710 Sb10g026910 Sb02g038130 Sb10g003810 Sb04g004250 Sb03g026070 Sb10g023010 Sb01g033060 Sb09g030600 Sb02g003090 Sb03g029570 Sb01g003880 Sb10g027490 Sb10g002070 Sb07g028940 Sb01g039890 Sb04g036240 Sb08g005200 Sb10g006330 Sb01g049020 Sb05g027870 Sb09g002320 Sb03g030100 Sb01g037090 Sb08g005190 Sb01g028750 Sb02g037780 Sb03g039630 Sb02g022090 Sb0…
GO:0009409	P	response to cold	32	130	625	26245	6.1e-23	1.2e-21	Sb09g003060 Sb01g005990 Sb01g049020 Sb10g026910 Sb02g038130 Sb10g003810 Sb04g004250 Sb03g026070 Sb05g027870 Sb01g033060 Sb09g030600 Sb02g003090 Sb03g029570 Sb10g027490 Sb10g002070 Sb01g039890 Sb04g036240 Sb08g005200 Sb10g006330 Sb09g002320 Sb03g030100 Sb01g037090 Sb08g005190 Sb01g028750 Sb02g037780 Sb03g039630 Sb02g022090 Sb03g040510 Sb01g031870 Sb09g028710 Sb02g043450 Sb02g022210
GO:0009725	P	response to hormone stimulus	44	130	1601	26245	2.8e-21	5.1e-20	Sb08g019700 Sb08g004840 Sb05g005470 Sb06g001720 Sb02g028770 Sb07g007610 Sb10g026910 Sb03g038600 Sb01g028330 Sb09g030600 Sb10g022200 Sb03g026070 Sb10g023010 Sb01g007120 Sb05g019540 Sb01g039740 Sb03g004540 Sb10g003810 Sb09g003060 Sb01g038150 Sb03g040355 Sb02g025790 Sb01g048440 Sb10g025470 Sb10g002070 Sb01g039890 Sb04g036240 Sb08g005200 Sb08g005190 Sb09g002320 Sb03g006060 Sb09g023180 Sb03g039820 Sb0…
GO:0055114	P	oxidation reduction	25	130	352	26245	3.4e-21	5.5e-20	Sb01g038760 Sb08g004840 Sb05g005470 Sb02g025790 Sb04g021990 Sb04g004250 Sb03g026070 Sb05g001000 Sb09g030600 Sb01g008730 Sb05g009360 Sb07g022990 Sb01g003880 Sb10g027490 Sb01g005670 Sb07g021630 Sb02g005200 Sb06g018220 Sb01g031520 Sb03g039820 Sb0010s007790 Sb04g000320 Sb02g037780 Sb05g009350 Sb09g022290
GO:0009738	P	abscisic acid mediated signaling pathway	20	130	192	26245	3.9e-20	6e-19	Sb08g019700 Sb03g026070 Sb03g006060 Sb09g023180 Sb0010s007790 Sb03g039630 Sb01g007120 Sb09g030600 Sb02g022090 Sb01g039890 Sb09g006700 Sb08g005200 Sb04g008040 Sb10g026910 Sb03g038600 Sb08g005190 Sb01g028330 Sb01g039740 Sb10g022200 Sb01g038150
GO:0070887	P	cellular response to chemical stimulus	34	130	941	26245	8.6e-20	1.2e-18	Sb01g038760 Sb08g019700 Sb02g025790 Sb01g005990 Sb10g026910 Sb03g038600 Sb02g038130 Sb01g028330 Sb10g022200 Sb03g026070 Sb10g023010 Sb01g007120 Sb09g030600 Sb02g003090 Sb04g021990 Sb01g038150 Sb03g040355 Sb01g003880 Sb10g003810 Sb01g039890 Sb08g005200 Sb08g005190 Sb01g039740 Sb03g030100 Sb03g006060 Sb09g023180 Sb0010s007790 Sb03g039630 Sb02g022090 Sb09g006700 Sb04g008040 Sb10g022780 Sb09g028710 S…
GO:0009719	P	response to endogenous stimulus	44	130	1755	26245	9.1e-20	1.2e-18	Sb08g019700 Sb08g004840 Sb05g005470 Sb06g001720 Sb02g028770 Sb07g007610 Sb10g026910 Sb03g038600 Sb01g028330 Sb09g030600 Sb10g022200 Sb03g026070 Sb10g023010 Sb01g007120 Sb05g019540 Sb01g039740 Sb03g004540 Sb10g003810 Sb09g003060 Sb01g038150 Sb03g040355 Sb02g025790 Sb01g048440 Sb10g025470 Sb10g002070 Sb01g039890 Sb04g036240 Sb08g005200 Sb08g005190 Sb09g002320 Sb03g006060 Sb09g023180 Sb03g039820 Sb0…
GO:0010035	P	response to inorganic substance	23	130	338	26245	3.7e-19	4.6e-18	Sb01g038760 Sb10g026910 Sb01g005990 Sb02g025790 Sb02g038130 Sb04g021990 Sb10g023010 Sb02g008820 Sb01g008730 Sb02g003090 Sb10g003810 Sb05g009360 Sb03g029570 Sb07g028940 Sb01g037090 Sb10g006330 Sb0010s007790 Sb02g037780 Sb05g009350 Sb01g033060 Sb10g022780 Sb02g043450 Sb02g022210
GO:0010033	P	response to organic substance	47	130	2117	26245	4e-19	4.8e-18	Sb08g019700 Sb08g004840 Sb05g005470 Sb06g001720 Sb02g028770 Sb07g007610 Sb10g026910 Sb03g038600 Sb01g028330 Sb09g030600 Sb10g022200 Sb03g026070 Sb10g023010 Sb01g007120 Sb05g019540 Sb01g039740 Sb03g004540 Sb10g003810 Sb09g003060 Sb01g038150 Sb03g040355 Sb01g003880 Sb02g025790 Sb01g048440 Sb10g025470 Sb10g002070 Sb01g039890 Sb04g036240 Sb08g005200 Sb08g005190 Sb09g002320 Sb03g006060 Sb09g023180 Sb0…
GO:0051716	P	cellular response to stimulus	37	130	1595	26245	1.9e-15	2.1e-14	Sb01g038760 Sb08g019700 Sb02g025790 Sb01g005990 Sb10g026910 Sb03g038600 Sb02g038130 Sb01g028330 Sb10g022200 Sb03g026070 Sb10g023010 Sb01g007120 Sb09g030600 Sb02g003090 Sb04g021990 Sb01g038150 Sb03g040355 Sb01g003880 Sb01g038750 Sb10g003810 Sb01g039890 Sb04g036240 Sb08g005200 Sb08g005190 Sb01g039740 Sb03g030100 Sb03g006060 Sb09g023180 Sb0010s007790 Sb08g017750 Sb03g039630 Sb02g022090 Sb09g006700 S…
GO:0046686	P	response to cadmium ion	14	130	116	26245	3.3e-15	3.5e-14	Sb01g038760 Sb10g006330 Sb05g009350 Sb02g037780 Sb01g005990 Sb02g008820 Sb01g008730 Sb02g003090 Sb01g033060 Sb03g029570 Sb02g038130 Sb10g022780 Sb05g009360 Sb02g022210
GO:0042631	P	cellular response to water deprivation	8	130	12	26245	3.4e-14	3.4e-13	Sb0010s007790 Sb01g005990 Sb02g003090 Sb02g022210 Sb02g038130 Sb10g022780 Sb09g028710 Sb03g030100
GO:0009755	P	hormone-mediated signaling pathway	23	130	608	26245	6.5e-14	6.3e-13	Sb08g019700 Sb10g026910 Sb02g025790 Sb03g038600 Sb01g028330 Sb10g022200 Sb03g026070 Sb10g023010 Sb01g007120 Sb09g030600 Sb03g006060 Sb01g038150 Sb03g040355 Sb01g039890 Sb08g005200 Sb09g023180 Sb01g039740 Sb08g005190 Sb0010s007790 Sb03g039630 Sb02g022090 Sb09g006700 Sb04g008040
GO:0032870	P	cellular response to hormone stimulus	23	130	627	26245	1.2e-13	1.1e-12	Sb08g019700 Sb10g026910 Sb02g025790 Sb03g038600 Sb01g028330 Sb10g022200 Sb03g026070 Sb10g023010 Sb01g007120 Sb09g030600 Sb03g006060 Sb01g038150 Sb03g040355 Sb01g039890 Sb08g005200 Sb09g023180 Sb01g039740 Sb08g005190 Sb0010s007790 Sb03g039630 Sb02g022090 Sb09g006700 Sb04g008040
GO:0010118	P	stomatal movement	14	130	189	26245	1.6e-12	1.4e-11	Sb08g019700 Sb01g028750 Sb01g048440 Sb03g026070 Sb10g025470 Sb03g039630 Sb01g007120 Sb09g030600 Sb02g022090 Sb01g039890 Sb07g007610 Sb10g026910 Sb05g021820 Sb06g031240
GO:0006979	P	response to oxidative stress	21	130	605	26245	4.3e-12	3.7e-11	Sb01g038760 Sb02g022210 Sb01g005990 Sb10g027490 Sb02g025790 Sb03g039820 Sb0010s007790 Sb05g001000 Sb10g002070 Sb10g022780 Sb02g003090 Sb01g037090 Sb04g021990 Sb10g026910 Sb02g038130 Sb10g023010 Sb02g005200 Sb09g022290 Sb02g043450 Sb10g003810 Sb04g004250
GO:0009269	P	response to desiccation	10	130	71	26245	8.3e-12	6.8e-11	Sb04g004250 Sb10g027490 Sb08g004840 Sb03g039820 Sb05g005470 Sb02g008820 Sb01g031870 Sb07g024160 Sb02g025790 Sb09g022290
GO:0016311	P	dephosphorylation	12	130	151	26245	3.2e-11	2.5e-10	Sb09g026860 Sb03g040355 Sb09g022410 Sb09g029080 Sb03g029890 Sb03g026070 Sb06g001720 Sb03g039630 Sb09g030600 Sb02g022090 Sb01g039890 Sb03g032740
GO:0009787	P	regulation of abscisic acid mediated signaling pathway	10	130	88	26245	5.8e-11	4.4e-10	Sb08g019700 Sb03g026070 Sb03g006060 Sb03g039630 Sb01g007120 Sb09g030600 Sb02g022090 Sb01g039890 Sb09g006700 Sb01g039740
GO:0010038	P	response to metal ion	14	130	260	26245	9.1e-11	6.7e-10	Sb01g038760 Sb10g006330 Sb05g009350 Sb02g037780 Sb01g005990 Sb02g008820 Sb01g008730 Sb02g003090 Sb01g033060 Sb03g029570 Sb02g038130 Sb10g022780 Sb05g009360 Sb02g022210
GO:0006470	P	protein amino acid dephosphorylation	11	130	132	26245	1.4e-10	9.6e-10	Sb09g026860 Sb03g026070 Sb09g029080 Sb03g029890 Sb09g022410 Sb06g001720 Sb03g039630 Sb09g030600 Sb02g022090 Sb01g039890 Sb03g032740
GO:0010119	P	regulation of stomatal movement	11	130	133	26245	1.5e-10	1e-09	Sb08g019700 Sb03g026070 Sb01g048440 Sb10g025470 Sb03g039630 Sb01g007120 Sb09g030600 Sb02g022090 Sb01g039890 Sb07g007610 Sb06g031240
GO:0006790	P	sulfur metabolic process	13	130	229	26245	2.4e-10	1.6e-09	Sb01g005670 Sb04g002790 Sb08g005190 Sb01g038750 Sb01g005990 Sb02g003090 Sb07g021630 Sb08g005200 Sb02g022210 Sb02g038130 Sb10g022780 Sb01g039740 Sb10g003810
GO:0008152	P	metabolic process	105	130	14876	26245	6.4e-09	4.1e-08	Sb08g004840 Sb06g001720 Sb02g028770 Sb06g025710 Sb02g043620 Sb06g033990 Sb10g003810 Sb02g026570 Sb04g004690 Sb01g035380 Sb09g021410 Sb08g003760 Sb09g023920 Sb01g008730 Sb02g003090 Sb03g040355 Sb01g003880 Sb10g027490 Sb10g025470 Sb10g002070 Sb04g006970 Sb07g021630 Sb03g039820 Sb01g045920 Sb02g005200 Sb03g006060 Sb01g031520 Sb04g000320 Sb02g037780 Sb03g040510 Sb06g031240 Sb01g038760 Sb03g029920 Sb0…
GO:0009966	P	regulation of signal transduction	13	130	311	26245	8.2e-09	5.2e-08	Sb08g019700 Sb03g026070 Sb08g005190 Sb01g038750 Sb03g039630 Sb01g007120 Sb09g030600 Sb02g022090 Sb01g039890 Sb09g006700 Sb08g005200 Sb03g006060 Sb01g039740
GO:0007242	P	intracellular signaling cascade	26	130	1430	26245	9.4e-09	5.7e-08	Sb08g019700 Sb10g026910 Sb02g025790 Sb03g038600 Sb01g028330 Sb10g022200 Sb03g006060 Sb10g023010 Sb01g007120 Sb09g030600 Sb10g003810 Sb01g038150 Sb03g040355 Sb01g003880 Sb01g038750 Sb03g026070 Sb01g039890 Sb08g005200 Sb08g005190 Sb01g039740 Sb09g023180 Sb0010s007790 Sb03g039630 Sb02g022090 Sb09g006700 Sb04g008040
GO:0010646	P	regulation of cell communication	13	130	326	26245	1.4e-08	8.3e-08	Sb08g019700 Sb03g026070 Sb08g005190 Sb01g038750 Sb03g039630 Sb01g007120 Sb09g030600 Sb02g022090 Sb01g039890 Sb09g006700 Sb08g005200 Sb03g006060 Sb01g039740
GO:0044262	P	cellular carbohydrate metabolic process	19	130	809	26245	2.6e-08	1.5e-07	Sb04g004690 Sb01g035380 Sb01g005670 Sb01g037090 Sb10g006330 Sb03g034680 Sb01g019850 Sb08g017750 Sb02g037780 Sb01g007120 Sb08g019700 Sb01g017050 Sb03g004540 Sb01g033060 Sb03g029570 Sb01g047500 Sb01g047540 Sb03g034880 Sb02g043450
GO:0048583	P	regulation of response to stimulus	13	130	351	26245	3.3e-08	1.8e-07	Sb08g019700 Sb03g026070 Sb03g006060 Sb01g038750 Sb03g039630 Sb01g007120 Sb09g030600 Sb02g022090 Sb01g039890 Sb09g006700 Sb10g026910 Sb01g039740 Sb10g003810
GO:0044237	P	cellular metabolic process	92	130	12323	26245	3.6e-08	1.9e-07	Sb08g004840 Sb06g001720 Sb02g028770 Sb06g025710 Sb02g043620 Sb06g033990 Sb10g003810 Sb02g026570 Sb04g004690 Sb01g035380 Sb09g021410 Sb08g003760 Sb09g023920 Sb02g003090 Sb03g040355 Sb01g003880 Sb10g025470 Sb10g002070 Sb04g006970 Sb07g021630 Sb02g005200 Sb03g006060 Sb03g039820 Sb02g037780 Sb03g040510 Sb06g031240 Sb01g038760 Sb03g029920 Sb01g049020 Sb01g030570 Sb04g021990 Sb03g026070 Sb10g023010 Sb0…
GO:0033554	P	cellular response to stress	17	130	686	26245	7.1e-08	3.8e-07	Sb01g038760 Sb02g022210 Sb10g023010 Sb01g038750 Sb0010s007790 Sb08g017750 Sb01g005990 Sb02g003090 Sb04g036240 Sb03g030100 Sb10g003810 Sb10g026910 Sb02g038130 Sb10g022780 Sb09g028710 Sb01g039740 Sb04g021990
GO:0031668	P	cellular response to extracellular stimulus	9	130	147	26245	8.4e-08	4.4e-07	Sb0010s007790 Sb01g005990 Sb02g003090 Sb04g036240 Sb02g022210 Sb02g038130 Sb10g022780 Sb09g028710 Sb03g030100
GO:0016053	P	organic acid biosynthetic process	16	130	637	26245	1.5e-07	7.3e-07	Sb08g019700 Sb06g018220 Sb01g003880 Sb08g005190 Sb03g034680 Sb03g039820 Sb01g007120 Sb01g005670 Sb04g006970 Sb07g021630 Sb04g002790 Sb08g005200 Sb10g026910 Sb01g047540 Sb09g022290 Sb01g039740
GO:0046394	P	carboxylic acid biosynthetic process	16	130	637	26245	1.5e-07	7.3e-07	Sb08g019700 Sb06g018220 Sb01g003880 Sb08g005190 Sb03g034680 Sb03g039820 Sb01g007120 Sb01g005670 Sb04g006970 Sb07g021630 Sb04g002790 Sb08g005200 Sb10g026910 Sb01g047540 Sb09g022290 Sb01g039740
GO:0050794	P	regulation of cellular process	54	130	5663	26245	2.6e-07	1.3e-06	Sb08g019700 Sb03g037740 Sb04g002790 Sb10g026910 Sb03g029920 Sb02g028770 Sb06g025710 Sb06g026410 Sb01g030570 Sb02g043620 Sb03g038600 Sb01g028330 Sb09g021580 Sb10g022200 Sb02g026570 Sb02g022280 Sb10g023010 Sb08g003760 Sb01g007120 Sb05g019540 Sb09g023920 Sb09g030600 Sb10g003810 Sb01g038150 Sb03g040355 Sb01g003880 Sb01g038750 Sb01g048440 Sb03g026070 Sb10g025470 Sb02g025790 Sb04g006970 Sb01g039890 Sb0…
GO:0009788	P	negative regulation of abscisic acid mediated signaling pathway	6	130	49	26245	3e-07	1.4e-06	Sb03g026070 Sb03g006060 Sb03g039630 Sb09g030600 Sb02g022090 Sb01g039890
GO:0006749	P	glutathione metabolic process	5	130	25	26245	3.5e-07	1.6e-06	Sb02g038130 Sb02g003090 Sb01g005990 Sb02g022210 Sb10g022780
GO:0043289	P	apocarotenoid biosynthetic process	5	130	26	26245	4.1e-07	1.8e-06	Sb01g005670 Sb06g018220 Sb01g003880 Sb03g034680 Sb10g026910
GO:0009688	P	abscisic acid biosynthetic process	5	130	26	26245	4.1e-07	1.8e-06	Sb01g005670 Sb06g018220 Sb01g003880 Sb03g034680 Sb10g026910
GO:0042214	P	terpene metabolic process	6	130	53	26245	4.6e-07	2e-06	Sb01g005670 Sb01g003880 Sb03g034680 Sb06g018220 Sb10g026910 Sb01g047540
GO:0009968	P	negative regulation of signal transduction	8	130	132	26245	4.9e-07	2.1e-06	Sb03g026070 Sb03g006060 Sb03g039630 Sb09g030600 Sb02g022090 Sb01g039890 Sb08g005200 Sb08g005190
GO:0043436	P	oxoacid metabolic process	22	130	1301	26245	5.2e-07	2.1e-06	Sb08g019700 Sb04g002790 Sb02g028770 Sb10g026910 Sb03g034680 Sb01g017050 Sb01g007120 Sb03g029570 Sb01g003880 Sb03g035220 Sb10g002070 Sb06g018220 Sb04g006970 Sb04g036240 Sb08g005200 Sb01g039740 Sb01g005670 Sb08g005190 Sb03g039820 Sb07g021630 Sb01g047540 Sb09g022290
GO:0006082	P	organic acid metabolic process	22	130	1302	26245	5.2e-07	2.1e-06	Sb08g019700 Sb04g002790 Sb02g028770 Sb10g026910 Sb03g034680 Sb01g017050 Sb01g007120 Sb03g029570 Sb01g003880 Sb03g035220 Sb10g002070 Sb06g018220 Sb04g006970 Sb04g036240 Sb08g005200 Sb01g039740 Sb01g005670 Sb08g005190 Sb03g039820 Sb07g021630 Sb01g047540 Sb09g022290
GO:0019752	P	carboxylic acid metabolic process	22	130	1301	26245	5.2e-07	2.1e-06	Sb08g019700 Sb04g002790 Sb02g028770 Sb10g026910 Sb03g034680 Sb01g017050 Sb01g007120 Sb03g029570 Sb01g003880 Sb03g035220 Sb10g002070 Sb06g018220 Sb04g006970 Sb04g036240 Sb08g005200 Sb01g039740 Sb01g005670 Sb08g005190 Sb03g039820 Sb07g021630 Sb01g047540 Sb09g022290
GO:0010648	P	negative regulation of cell communication	8	130	134	26245	5.4e-07	2.1e-06	Sb03g026070 Sb03g006060 Sb03g039630 Sb09g030600 Sb02g022090 Sb01g039890 Sb08g005200 Sb08g005190
GO:0016106	P	sesquiterpenoid biosynthetic process	5	130	28	26245	5.7e-07	2.1e-06	Sb01g005670 Sb06g018220 Sb01g003880 Sb03g034680 Sb10g026910
GO:0051762	P	sesquiterpene biosynthetic process	5	130	28	26245	5.7e-07	2.1e-06	Sb01g005670 Sb06g018220 Sb01g003880 Sb03g034680 Sb10g026910
GO:0005985	P	sucrose metabolic process	5	130	28	26245	5.7e-07	2.1e-06	Sb08g019700 Sb03g004540 Sb01g033060 Sb01g007120 Sb10g006330
GO:0042180	P	cellular ketone metabolic process	22	130	1318	26245	6.4e-07	2.4e-06	Sb08g019700 Sb04g002790 Sb02g028770 Sb10g026910 Sb03g034680 Sb01g017050 Sb01g007120 Sb03g029570 Sb01g003880 Sb03g035220 Sb10g002070 Sb06g018220 Sb04g006970 Sb04g036240 Sb08g005200 Sb01g039740 Sb01g005670 Sb08g005190 Sb03g039820 Sb07g021630 Sb01g047540 Sb09g022290
GO:0005975	P	carbohydrate metabolic process	23	130	1452	26245	8.4e-07	3e-06	Sb08g019700 Sb01g019850 Sb02g028770 Sb04g004690 Sb01g035380 Sb03g034680 Sb01g007120 Sb03g004540 Sb04g030950 Sb03g029570 Sb03g034880 Sb01g045920 Sb03g030100 Sb01g005670 Sb01g037090 Sb10g006330 Sb08g017750 Sb02g037780 Sb01g017050 Sb01g033060 Sb01g047500 Sb01g047540 Sb02g043450
GO:0009408	P	response to heat	11	130	324	26245	8.9e-07	3.2e-06	Sb01g038760 Sb03g026070 Sb01g003880 Sb10g023010 Sb02g028770 Sb06g025710 Sb01g037090 Sb10g026910 Sb07g028940 Sb09g030600 Sb02g043450
GO:0044248	P	cellular catabolic process	22	130	1352	26245	9.7e-07	3.4e-06	Sb01g038760 Sb02g025790 Sb01g019850 Sb06g025710 Sb07g007610 Sb10g026910 Sb04g021990 Sb04g004690 Sb03g029570 Sb01g048440 Sb10g025470 Sb10g002070 Sb08g005200 Sb02g005200 Sb01g039740 Sb08g005190 Sb0010s007790 Sb02g037780 Sb01g017050 Sb01g047500 Sb01g047540 Sb06g031240
GO:0009687	P	abscisic acid metabolic process	5	130	32	26245	1e-06	3.6e-06	Sb01g005670 Sb06g018220 Sb01g003880 Sb03g034680 Sb10g026910
GO:0000302	P	response to reactive oxygen species	9	130	203	26245	1.1e-06	3.8e-06	Sb01g038760 Sb01g037090 Sb10g023010 Sb02g025790 Sb0010s007790 Sb10g003810 Sb10g026910 Sb02g043450 Sb04g021990
GO:0009987	P	cellular process	106	130	16277	26245	1.2e-06	4.1e-06	Sb08g004840 Sb06g001720 Sb02g028770 Sb06g025710 Sb02g043620 Sb06g033990 Sb10g022200 Sb02g026570 Sb04g004690 Sb01g035380 Sb09g021410 Sb08g003760 Sb09g023920 Sb02g003090 Sb01g038150 Sb03g040355 Sb01g003880 Sb10g025470 Sb10g002070 Sb04g006970 Sb07g021630 Sb03g032530 Sb02g005200 Sb03g006060 Sb03g039820 Sb02g037780 Sb03g040510 Sb10g006330 Sb09g028710 Sb06g031240 Sb01g038760 Sb03g029920 Sb01g049020 Sb0…
GO:0043288	P	apocarotenoid metabolic process	5	130	34	26245	1.4e-06	4.3e-06	Sb01g005670 Sb06g018220 Sb01g003880 Sb03g034680 Sb10g026910
GO:0051761	P	sesquiterpene metabolic process	5	130	34	26245	1.4e-06	4.3e-06	Sb01g005670 Sb06g018220 Sb01g003880 Sb03g034680 Sb10g026910
GO:0006714	P	sesquiterpenoid metabolic process	5	130	34	26245	1.4e-06	4.3e-06	Sb01g005670 Sb06g018220 Sb01g003880 Sb03g034680 Sb10g026910
GO:0046246	P	terpene biosynthetic process	5	130	39	26245	2.5e-06	7.9e-06	Sb01g005670 Sb06g018220 Sb01g003880 Sb03g034680 Sb10g026910
GO:0046700	P	heterocycle catabolic process	6	130	82	26245	5e-06	1.5e-05	Sb01g048440 Sb10g025470 Sb07g007610 Sb02g025790 Sb02g005200 Sb06g031240
GO:0032787	P	monocarboxylic acid metabolic process	14	130	661	26245	6.4e-06	2e-05	Sb08g019700 Sb06g018220 Sb01g003880 Sb08g005190 Sb03g034680 Sb01g017050 Sb01g007120 Sb01g005670 Sb04g006970 Sb04g036240 Sb08g005200 Sb10g026910 Sb01g047540 Sb02g028770
GO:0009991	P	response to extracellular stimulus	9	130	255	26245	6.8e-06	2e-05	Sb0010s007790 Sb01g005990 Sb02g003090 Sb04g036240 Sb02g022210 Sb02g038130 Sb10g022780 Sb09g028710 Sb03g030100
GO:0006081	P	cellular aldehyde metabolic process	5	130	49	26245	7e-06	2.1e-05	Sb05g005470 Sb01g047540 Sb08g004840 Sb02g025790 Sb01g017050
GO:0006518	P	peptide metabolic process	5	130	50	26245	7.7e-06	2.2e-05	Sb02g038130 Sb02g003090 Sb01g005990 Sb02g022210 Sb10g022780
GO:0016137	P	glycoside metabolic process	6	130	98	26245	1.3e-05	3.8e-05	Sb08g019700 Sb01g005670 Sb10g006330 Sb01g007120 Sb03g004540 Sb01g033060
GO:0034641	P	cellular nitrogen compound metabolic process	14	130	718	26245	1.6e-05	4.5e-05	Sb01g003880 Sb01g038750 Sb03g039820 Sb03g035220 Sb10g002070 Sb01g047540 Sb07g021630 Sb04g002790 Sb02g025790 Sb10g026910 Sb02g005200 Sb09g022290 Sb01g039740 Sb10g003810
GO:0006972	P	hyperosmotic response	7	130	155	26245	1.6e-05	4.6e-05	Sb04g004250 Sb10g027490 Sb03g039820 Sb09g003060 Sb02g037780 Sb10g026910 Sb09g022290
GO:0048585	P	negative regulation of response to stimulus	7	130	156	26245	1.7e-05	4.7e-05	Sb03g026070 Sb03g006060 Sb03g039630 Sb09g030600 Sb02g022090 Sb01g039890 Sb10g026910
GO:0051186	P	cofactor metabolic process	11	130	452	26245	1.9e-05	5.3e-05	Sb04g002790 Sb02g025790 Sb01g005990 Sb02g003090 Sb03g029570 Sb10g026910 Sb02g038130 Sb02g005200 Sb10g022780 Sb01g047540 Sb02g022210
GO:0010565	P	regulation of cellular ketone metabolic process	5	130	62	26245	2e-05	5.5e-05	Sb08g005190 Sb01g003880 Sb08g005200 Sb03g034680 Sb02g028770
GO:0050789	P	regulation of biological process	54	130	6509	26245	2.2e-05	5.9e-05	Sb08g019700 Sb03g037740 Sb04g002790 Sb10g026910 Sb03g029920 Sb02g028770 Sb06g025710 Sb06g026410 Sb01g030570 Sb02g043620 Sb03g038600 Sb01g028330 Sb09g021580 Sb10g022200 Sb02g026570 Sb02g022280 Sb10g023010 Sb08g003760 Sb01g007120 Sb05g019540 Sb09g023920 Sb09g030600 Sb10g003810 Sb01g038150 Sb03g040355 Sb01g003880 Sb01g038750 Sb01g048440 Sb03g026070 Sb10g025470 Sb02g025790 Sb04g006970 Sb01g039890 Sb0…
GO:0042542	P	response to hydrogen peroxide	7	130	167	26245	2.6e-05	6.6e-05	Sb01g038760 Sb01g037090 Sb10g023010 Sb0010s007790 Sb10g003810 Sb02g043450 Sb04g021990
GO:0005984	P	disaccharide metabolic process	5	130	65	26245	2.5e-05	6.6e-05	Sb08g019700 Sb03g004540 Sb01g033060 Sb01g007120 Sb10g006330
GO:0009058	P	biosynthetic process	56	130	6890	26245	2.6e-05	6.6e-05	Sb08g019700 Sb03g037740 Sb04g002790 Sb10g026910 Sb03g029920 Sb03g035220 Sb02g028770 Sb06g025710 Sb06g026410 Sb01g030570 Sb02g043620 Sb09g021580 Sb10g003810 Sb02g026570 Sb01g035380 Sb10g023010 Sb08g003760 Sb05g019540 Sb01g017050 Sb01g007120 Sb01g033060 Sb09g023920 Sb03g004540 Sb03g034880 Sb03g040355 Sb01g003880 Sb01g038750 Sb01g048440 Sb02g022280 Sb10g025470 Sb10g002070 Sb01g005670 Sb04g006970 Sb0…
GO:0006355	P	regulation of transcription, DNA-dependent	22	130	1682	26245	3e-05	7.5e-05	Sb03g037740 Sb03g029920 Sb01g049020 Sb06g025710 Sb06g026410 Sb01g030570 Sb02g043620 Sb02g026570 Sb02g022280 Sb10g023010 Sb08g003760 Sb05g019540 Sb09g023920 Sb03g040355 Sb09g021580 Sb04g006970 Sb01g036810 Sb03g040970 Sb01g010070 Sb10g007090 Sb02g025080 Sb03g040510
GO:0007165	P	signal transduction	26	130	2211	26245	3.1e-05	7.8e-05	Sb08g019700 Sb10g026910 Sb02g025790 Sb03g038600 Sb01g028330 Sb10g022200 Sb03g006060 Sb10g023010 Sb01g007120 Sb09g030600 Sb10g003810 Sb01g038150 Sb03g040355 Sb01g003880 Sb01g038750 Sb03g026070 Sb01g039890 Sb08g005200 Sb08g005190 Sb01g039740 Sb09g023180 Sb0010s007790 Sb03g039630 Sb02g022090 Sb09g006700 Sb04g008040
GO:0016114	P	terpenoid biosynthetic process	6	130	117	26245	3.4e-05	8.3e-05	Sb01g005670 Sb01g003880 Sb03g034680 Sb06g018220 Sb10g026910 Sb01g047540
GO:0044238	P	primary metabolic process	87	130	12901	26245	3.4e-05	8.3e-05	Sb06g001720 Sb02g028770 Sb06g025710 Sb02g043620 Sb06g033990 Sb02g026570 Sb04g004690 Sb01g035380 Sb09g021410 Sb08g003760 Sb09g023920 Sb02g003090 Sb03g040355 Sb01g003880 Sb10g025470 Sb10g002070 Sb04g006970 Sb07g021630 Sb01g045920 Sb03g006060 Sb03g039820 Sb02g037780 Sb03g040510 Sb06g031240 Sb08g019700 Sb03g029920 Sb01g049020 Sb01g030570 Sb03g026070 Sb10g023010 Sb01g048440 Sb03g004540 Sb04g030950 Sb0…
GO:0006732	P	coenzyme metabolic process	9	130	316	26245	3.5e-05	8.5e-05	Sb04g002790 Sb01g005990 Sb02g003090 Sb03g029570 Sb10g026910 Sb02g038130 Sb01g047540 Sb10g022780 Sb02g022210
GO:0042538	P	hyperosmotic salinity response	6	130	125	26245	4.8e-05	0.00012	Sb04g004250 Sb10g027490 Sb03g039820 Sb09g003060 Sb10g026910 Sb09g022290
GO:0042742	P	defense response to bacterium	8	130	261	26245	5.9e-05	0.00014	Sb08g019700 Sb05g027870 Sb03g034680 Sb01g010070 Sb01g007120 Sb03g029570 Sb10g026910 Sb10g003810
GO:0044271	P	cellular nitrogen compound biosynthetic process	11	130	513	26245	5.9e-05	0.00014	Sb01g003880 Sb01g038750 Sb03g039820 Sb10g002070 Sb07g021630 Sb04g002790 Sb10g026910 Sb01g047540 Sb09g022290 Sb01g039740 Sb10g003810
GO:0044249	P	cellular biosynthetic process	53	130	6576	26245	6.4e-05	0.00015	Sb08g019700 Sb03g037740 Sb04g002790 Sb10g026910 Sb03g029920 Sb02g028770 Sb06g025710 Sb06g026410 Sb01g030570 Sb02g043620 Sb09g021580 Sb10g003810 Sb02g026570 Sb01g035380 Sb10g023010 Sb08g003760 Sb01g017050 Sb01g007120 Sb05g019540 Sb09g023920 Sb03g004540 Sb03g034880 Sb03g040355 Sb01g003880 Sb01g038750 Sb01g048440 Sb02g022280 Sb10g025470 Sb10g002070 Sb01g005670 Sb04g006970 Sb07g021630 Sb08g005200 Sb0…
GO:0051252	P	regulation of RNA metabolic process	22	130	1782	26245	7e-05	0.00016	Sb03g037740 Sb03g029920 Sb01g049020 Sb06g025710 Sb06g026410 Sb01g030570 Sb02g043620 Sb02g026570 Sb02g022280 Sb10g023010 Sb08g003760 Sb05g019540 Sb09g023920 Sb03g040355 Sb09g021580 Sb04g006970 Sb01g036810 Sb03g040970 Sb01g010070 Sb10g007090 Sb02g025080 Sb03g040510
GO:0046483	P	heterocycle metabolic process	13	130	739	26245	9.1e-05	0.00021	Sb01g003880 Sb01g048440 Sb03g039820 Sb10g025470 Sb01g047540 Sb07g007610 Sb02g025790 Sb10g026910 Sb02g005200 Sb09g022290 Sb06g031240 Sb10g003810 Sb01g038750
GO:0008299	P	isoprenoid biosynthetic process	6	130	149	26245	0.00012	0.00027	Sb01g005670 Sb01g003880 Sb03g034680 Sb06g018220 Sb10g026910 Sb01g047540
GO:0009311	P	oligosaccharide metabolic process	5	130	93	26245	0.00013	0.00028	Sb08g019700 Sb03g004540 Sb01g033060 Sb01g007120 Sb10g006330
GO:0006721	P	terpenoid metabolic process	6	130	154	26245	0.00015	0.00032	Sb01g005670 Sb01g003880 Sb03g034680 Sb06g018220 Sb10g026910 Sb01g047540
GO:0006351	P	transcription, DNA-dependent	22	130	1892	26245	0.00016	0.00036	Sb03g037740 Sb03g029920 Sb01g049020 Sb06g025710 Sb06g026410 Sb01g030570 Sb02g043620 Sb02g026570 Sb02g022280 Sb10g023010 Sb08g003760 Sb05g019540 Sb09g023920 Sb03g040355 Sb09g021580 Sb04g006970 Sb01g036810 Sb03g040970 Sb01g010070 Sb10g007090 Sb02g025080 Sb03g040510
GO:0032774	P	RNA biosynthetic process	22	130	1893	26245	0.00017	0.00036	Sb03g037740 Sb03g029920 Sb01g049020 Sb06g025710 Sb06g026410 Sb01g030570 Sb02g043620 Sb02g026570 Sb02g022280 Sb10g023010 Sb08g003760 Sb05g019540 Sb09g023920 Sb03g040355 Sb09g021580 Sb04g006970 Sb01g036810 Sb03g040970 Sb01g010070 Sb10g007090 Sb02g025080 Sb03g040510
GO:0019318	P	hexose metabolic process	8	130	309	26245	0.00018	0.00039	Sb04g004690 Sb01g035380 Sb01g037090 Sb02g037780 Sb01g017050 Sb03g004540 Sb01g047540 Sb02g043450
GO:0065007	P	biological regulation	56	130	7386	26245	0.0002	0.00042	Sb08g019700 Sb03g037740 Sb04g002790 Sb10g026910 Sb03g029920 Sb02g028770 Sb06g025710 Sb06g026410 Sb01g030570 Sb02g043620 Sb03g038600 Sb01g028330 Sb09g021580 Sb10g022200 Sb02g026570 Sb02g022280 Sb10g023010 Sb08g003760 Sb01g007120 Sb05g019540 Sb09g023920 Sb09g030600 Sb10g003810 Sb01g038150 Sb03g040355 Sb01g003880 Sb01g038750 Sb01g048440 Sb03g026070 Sb10g025470 Sb02g025790 Sb04g006970 Sb01g039890 Sb0…
GO:0008610	P	lipid biosynthetic process	12	130	694	26245	0.0002	0.00042	Sb08g019700 Sb06g018220 Sb01g003880 Sb08g005190 Sb03g034680 Sb01g007120 Sb01g005670 Sb04g006970 Sb04g036240 Sb08g005200 Sb10g026910 Sb01g047540
GO:0009642	P	response to light intensity	6	130	164	26245	0.0002	0.00042	Sb03g026070 Sb01g037090 Sb10g023010 Sb09g030600 Sb02g043450 Sb03g030100
GO:0009416	P	response to light stimulus	14	130	965	26245	0.00035	0.00071	Sb03g026070 Sb01g037090 Sb08g005190 Sb01g038750 Sb09g030600 Sb04g036240 Sb08g005200 Sb03g030100 Sb05g021820 Sb10g023010 Sb07g028940 Sb05g027870 Sb02g043450 Sb07g022990
GO:0006720	P	isoprenoid metabolic process	6	130	187	26245	0.0004	0.00081	Sb01g005670 Sb01g003880 Sb03g034680 Sb06g018220 Sb10g026910 Sb01g047540
GO:0009644	P	response to high light intensity	5	130	121	26245	0.00041	0.00082	Sb03g026070 Sb01g037090 Sb10g023010 Sb02g043450 Sb09g030600
GO:0009314	P	response to radiation	14	130	988	26245	0.00044	0.00087	Sb03g026070 Sb01g037090 Sb08g005190 Sb01g038750 Sb09g030600 Sb04g036240 Sb08g005200 Sb03g030100 Sb05g021820 Sb10g023010 Sb07g028940 Sb05g027870 Sb02g043450 Sb07g022990
GO:0009056	P	catabolic process	24	130	2324	26245	0.00046	0.00091	Sb01g038760 Sb10g026910 Sb01g019850 Sb02g028770 Sb06g025710 Sb07g007610 Sb02g025790 Sb04g021990 Sb04g004690 Sb09g002320 Sb03g029570 Sb01g048440 Sb10g025470 Sb10g002070 Sb08g005200 Sb02g005200 Sb01g039740 Sb08g005190 Sb0010s007790 Sb02g037780 Sb01g017050 Sb01g047500 Sb01g047540 Sb06g031240
GO:0006796	P	phosphate metabolic process	22	130	2044	26245	0.00047	0.00093	Sb08g019700 Sb09g029080 Sb01g033570 Sb06g001720 Sb06g033990 Sb09g026860 Sb03g026070 Sb09g021410 Sb01g007120 Sb04g022410 Sb09g030600 Sb03g040355 Sb01g038750 Sb03g029890 Sb09g022410 Sb08g005200 Sb03g032740 Sb08g005190 Sb01g039890 Sb03g039630 Sb02g039640 Sb02g022090
GO:0031323	P	regulation of cellular metabolic process	31	130	3387	26245	0.00049	0.00095	Sb03g037740 Sb04g002790 Sb03g029920 Sb02g028770 Sb06g025710 Sb06g026410 Sb01g030570 Sb02g043620 Sb02g026570 Sb02g022280 Sb10g023010 Sb08g003760 Sb05g019540 Sb09g023920 Sb09g030600 Sb03g040355 Sb01g003880 Sb01g038750 Sb09g021580 Sb03g026070 Sb04g006970 Sb08g005200 Sb01g036810 Sb01g049020 Sb03g034680 Sb03g040970 Sb08g005190 Sb01g010070 Sb10g007090 Sb02g025080 Sb03g040510
GO:0006793	P	phosphorus metabolic process	22	130	2050	26245	0.00049	0.00095	Sb08g019700 Sb09g029080 Sb01g033570 Sb06g001720 Sb06g033990 Sb09g026860 Sb03g026070 Sb09g021410 Sb01g007120 Sb04g022410 Sb09g030600 Sb03g040355 Sb01g038750 Sb03g029890 Sb09g022410 Sb08g005200 Sb03g032740 Sb08g005190 Sb01g039890 Sb03g039630 Sb02g039640 Sb02g022090
GO:0009889	P	regulation of biosynthetic process	28	130	2954	26245	0.00057	0.0011	Sb03g037740 Sb04g002790 Sb03g029920 Sb02g028770 Sb06g025710 Sb06g026410 Sb01g030570 Sb02g043620 Sb02g026570 Sb02g022280 Sb10g023010 Sb08g003760 Sb05g019540 Sb09g023920 Sb03g040355 Sb01g003880 Sb09g021580 Sb04g006970 Sb08g005200 Sb01g036810 Sb01g049020 Sb03g034680 Sb03g040970 Sb08g005190 Sb01g010070 Sb10g007090 Sb02g025080 Sb03g040510
GO:0048584	P	positive regulation of response to stimulus	5	130	133	26245	0.00062	0.0012	Sb08g019700 Sb09g006700 Sb01g007120 Sb01g039740 Sb10g003810
GO:0009309	P	amine biosynthetic process	7	130	288	26245	0.00067	0.0012	Sb01g003880 Sb03g039820 Sb10g002070 Sb07g021630 Sb04g002790 Sb09g022290 Sb01g039740
GO:0044272	P	sulfur compound biosynthetic process	5	130	137	26245	0.0007	0.0013	Sb07g021630 Sb04g002790 Sb01g038750 Sb10g003810 Sb01g039740
GO:0048522	P	positive regulation of cellular process	10	130	590	26245	0.0008	0.0015	Sb08g019700 Sb03g040355 Sb10g023010 Sb03g034680 Sb01g007120 Sb03g040510 Sb09g006700 Sb08g005200 Sb08g005190 Sb01g039740
GO:0005996	P	monosaccharide metabolic process	8	130	397	26245	0.00092	0.0017	Sb04g004690 Sb01g035380 Sb01g037090 Sb02g037780 Sb01g017050 Sb03g004540 Sb01g047540 Sb02g043450
GO:0009617	P	response to bacterium	8	130	405	26245	0.001	0.0019	Sb08g019700 Sb05g027870 Sb03g034680 Sb01g010070 Sb01g007120 Sb03g029570 Sb10g026910 Sb10g003810
GO:0018130	P	heterocycle biosynthetic process	5	130	155	26245	0.0012	0.0021	Sb01g047540 Sb01g003880 Sb10g026910 Sb03g039820 Sb09g022290
GO:0031326	P	regulation of cellular biosynthetic process	27	130	2954	26245	0.0013	0.0022	Sb03g037740 Sb04g002790 Sb03g029920 Sb01g049020 Sb06g025710 Sb06g026410 Sb01g030570 Sb02g043620 Sb02g026570 Sb02g022280 Sb10g023010 Sb08g003760 Sb05g019540 Sb09g023920 Sb03g040355 Sb01g003880 Sb09g021580 Sb04g006970 Sb08g005200 Sb01g036810 Sb03g034680 Sb03g040970 Sb08g005190 Sb01g010070 Sb10g007090 Sb02g025080 Sb03g040510
GO:0046486	P	glycerolipid metabolic process	5	130	158	26245	0.0013	0.0023	Sb08g019700 Sb08g005190 Sb01g047540 Sb01g007120 Sb08g005200
GO:0008652	P	cellular amino acid biosynthetic process	6	130	247	26245	0.0016	0.0028	Sb01g003880 Sb03g039820 Sb07g021630 Sb04g002790 Sb09g022290 Sb01g039740
GO:0006073	P	cellular glucan metabolic process	6	130	250	26245	0.0017	0.003	Sb01g035380 Sb03g034680 Sb01g019850 Sb08g017750 Sb01g047500 Sb03g034880
GO:0019222	P	regulation of metabolic process	31	130	3658	26245	0.0017	0.003	Sb03g037740 Sb04g002790 Sb03g029920 Sb02g028770 Sb06g025710 Sb06g026410 Sb01g030570 Sb02g043620 Sb02g026570 Sb02g022280 Sb10g023010 Sb08g003760 Sb05g019540 Sb09g023920 Sb09g030600 Sb03g040355 Sb01g003880 Sb01g038750 Sb09g021580 Sb03g026070 Sb04g006970 Sb08g005200 Sb01g036810 Sb01g049020 Sb03g034680 Sb03g040970 Sb08g005190 Sb01g010070 Sb10g007090 Sb02g025080 Sb03g040510
GO:0006633	P	fatty acid biosynthetic process	6	130	255	26245	0.0019	0.0032	Sb08g019700 Sb08g005190 Sb01g007120 Sb04g006970 Sb08g005200 Sb01g047540
GO:0044042	P	glucan metabolic process	6	130	264	26245	0.0023	0.0038	Sb01g035380 Sb03g034680 Sb01g019850 Sb08g017750 Sb01g047500 Sb03g034880
GO:0044275	P	cellular carbohydrate catabolic process	6	130	267	26245	0.0024	0.004	Sb04g004690 Sb01g019850 Sb02g037780 Sb01g017050 Sb01g047500 Sb01g047540
GO:0006519	P	cellular amino acid and derivative metabolic process	14	130	1185	26245	0.0024	0.004	Sb01g005990 Sb01g003880 Sb10g022780 Sb03g039820 Sb03g035220 Sb10g002070 Sb02g028770 Sb02g003090 Sb07g021630 Sb04g002790 Sb02g038130 Sb09g022290 Sb01g039740 Sb02g022210
GO:0080090	P	regulation of primary metabolic process	28	130	3278	26245	0.0027	0.0045	Sb03g037740 Sb04g002790 Sb03g029920 Sb02g028770 Sb06g025710 Sb06g026410 Sb01g030570 Sb02g043620 Sb02g026570 Sb02g022280 Sb10g023010 Sb08g003760 Sb05g019540 Sb09g023920 Sb03g040355 Sb01g003880 Sb09g021580 Sb04g006970 Sb08g005200 Sb01g036810 Sb01g049020 Sb03g034680 Sb03g040970 Sb08g005190 Sb01g010070 Sb10g007090 Sb02g025080 Sb03g040510
GO:0016052	P	carbohydrate catabolic process	7	130	371	26245	0.0028	0.0045	Sb04g004690 Sb01g019850 Sb02g037780 Sb01g017050 Sb02g028770 Sb01g047500 Sb01g047540
GO:0019748	P	secondary metabolic process	11	130	826	26245	0.0029	0.0047	Sb06g018220 Sb01g003880 Sb01g038750 Sb0010s007790 Sb01g005670 Sb02g028770 Sb06g025710 Sb10g026910 Sb01g047540 Sb10g003810 Sb03g034680
GO:0016070	P	RNA metabolic process	26	130	2983	26245	0.003	0.0049	Sb03g037740 Sb10g026910 Sb03g029920 Sb01g049020 Sb06g025710 Sb06g026410 Sb01g030570 Sb02g043620 Sb02g026570 Sb02g022280 Sb10g023010 Sb08g003760 Sb05g019540 Sb09g023920 Sb03g040355 Sb09g021580 Sb04g006970 Sb08g005200 Sb01g036810 Sb01g039740 Sb03g040970 Sb08g005190 Sb01g010070 Sb10g007090 Sb02g025080 Sb03g040510
GO:0006631	P	fatty acid metabolic process	7	130	387	26245	0.0035	0.0055	Sb08g019700 Sb08g005190 Sb01g007120 Sb04g006970 Sb04g036240 Sb08g005200 Sb01g047540
GO:0009605	P	response to external stimulus	11	130	881	26245	0.0047	0.0075	Sb10g002070 Sb01g038750 Sb0010s007790 Sb01g005990 Sb02g003090 Sb04g036240 Sb03g030100 Sb02g038130 Sb10g022780 Sb09g028710 Sb02g022210
GO:0043687	P	post-translational protein modification	21	130	2301	26245	0.0047	0.0075	Sb08g019700 Sb09g026860 Sb09g022410 Sb09g029080 Sb09g021410 Sb01g038750 Sb03g029890 Sb03g026070 Sb01g033570 Sb06g001720 Sb03g039630 Sb01g007120 Sb02g039640 Sb04g022410 Sb09g030600 Sb02g022090 Sb01g039890 Sb10g026910 Sb06g033990 Sb03g032740 Sb01g039740
GO:0044255	P	cellular lipid metabolic process	12	130	1030	26245	0.0055	0.0086	Sb08g019700 Sb06g018220 Sb01g003880 Sb08g005190 Sb03g034680 Sb01g007120 Sb01g005670 Sb04g006970 Sb04g036240 Sb08g005200 Sb10g026910 Sb01g047540
GO:0006807	P	nitrogen compound metabolic process	45	130	6387	26245	0.0056	0.0087	Sb03g037740 Sb04g002790 Sb10g026910 Sb03g029920 Sb02g028770 Sb06g025710 Sb06g026410 Sb01g030570 Sb02g043620 Sb09g021580 Sb10g003810 Sb02g026570 Sb02g022280 Sb10g023010 Sb08g003760 Sb01g017050 Sb05g019540 Sb09g023920 Sb03g035220 Sb02g025790 Sb03g040355 Sb01g003880 Sb01g038750 Sb01g048440 Sb10g025470 Sb10g002070 Sb04g006970 Sb07g021630 Sb08g005200 Sb01g036810 Sb02g005200 Sb01g049020 Sb01g039740 Sb0…
GO:0009117	P	nucleotide metabolic process	7	130	425	26245	0.0057	0.0087	Sb04g002790 Sb01g048440 Sb10g025470 Sb01g017050 Sb07g007610 Sb01g047540 Sb06g031240
GO:0006753	P	nucleoside phosphate metabolic process	7	130	425	26245	0.0057	0.0087	Sb04g002790 Sb01g048440 Sb10g025470 Sb01g017050 Sb07g007610 Sb01g047540 Sb06g031240
GO:0006629	P	lipid metabolic process	14	130	1351	26245	0.0075	0.011	Sb08g019700 Sb06g018220 Sb01g003880 Sb08g005190 Sb03g034680 Sb01g007120 Sb01g005670 Sb04g006970 Sb04g036240 Sb04g002790 Sb08g005200 Sb10g026910 Sb01g047540 Sb09g002320
GO:0007154	P	cell communication	22	130	2569	26245	0.008	0.012	Sb08g019700 Sb01g005990 Sb02g038130 Sb03g026070 Sb01g007120 Sb09g030600 Sb02g003090 Sb01g038750 Sb01g039890 Sb04g036240 Sb08g005200 Sb03g006060 Sb01g039740 Sb03g030100 Sb08g005190 Sb0010s007790 Sb03g039630 Sb02g022090 Sb09g006700 Sb10g022780 Sb09g028710 Sb02g022210
GO:0006464	P	protein modification process	22	130	2593	26245	0.0089	0.013	Sb08g019700 Sb09g029080 Sb01g033570 Sb06g001720 Sb10g026910 Sb06g033990 Sb09g026860 Sb03g026070 Sb09g021410 Sb01g007120 Sb04g022410 Sb09g030600 Sb01g038750 Sb03g029890 Sb09g022410 Sb03g032740 Sb01g039740 Sb03g006060 Sb01g039890 Sb03g039630 Sb02g039640 Sb02g022090
GO:0044264	P	cellular polysaccharide metabolic process	6	130	357	26245	0.0093	0.014	Sb01g035380 Sb03g034680 Sb01g019850 Sb08g017750 Sb01g047500 Sb03g034880
GO:0016051	P	carbohydrate biosynthetic process	7	130	473	26245	0.0098	0.015	Sb01g035380 Sb03g034680 Sb08g017750 Sb01g017050 Sb02g028770 Sb03g004540 Sb03g034880
GO:0005976	P	polysaccharide metabolic process	7	130	474	26245	0.01	0.015	Sb01g035380 Sb03g034680 Sb01g019850 Sb08g017750 Sb02g028770 Sb01g047500 Sb03g034880
GO:0034637	P	cellular carbohydrate biosynthetic process	6	130	365	26245	0.01	0.015	Sb01g035380 Sb03g034680 Sb08g017750 Sb01g017050 Sb03g004540 Sb03g034880
GO:0055086	P	nucleobase, nucleoside and nucleotide metabolic process	7	130	477	26245	0.01	0.015	Sb04g002790 Sb01g048440 Sb10g025470 Sb01g017050 Sb07g007610 Sb01g047540 Sb06g031240
GO:0006066	P	alcohol metabolic process	8	130	611	26245	0.012	0.017	Sb04g004690 Sb01g035380 Sb01g037090 Sb02g037780 Sb01g017050 Sb03g004540 Sb01g047540 Sb02g043450
GO:0044260	P	cellular macromolecule metabolic process	57	130	8922	26245	0.013	0.018	Sb08g019700 Sb03g037740 Sb09g022410 Sb09g029080 Sb10g026910 Sb01g019850 Sb01g033570 Sb06g001720 Sb03g029920 Sb01g049020 Sb06g025710 Sb06g026410 Sb01g030570 Sb02g043620 Sb06g033990 Sb09g021580 Sb02g026570 Sb04g004690 Sb01g035380 Sb10g023010 Sb08g003760 Sb01g017050 Sb01g007120 Sb05g019540 Sb09g023920 Sb09g030600 Sb03g026070 Sb03g034880 Sb03g040355 Sb01g038750 Sb03g029890 Sb02g022280 Sb04g006970 Sb0…
GO:0044265	P	cellular macromolecule catabolic process	10	130	878	26245	0.013	0.018	Sb04g004690 Sb08g005190 Sb10g026910 Sb01g019850 Sb02g037780 Sb01g017050 Sb08g005200 Sb01g047500 Sb01g047540 Sb01g039740
GO:0044106	P	cellular amine metabolic process	8	130	621	26245	0.013	0.018	Sb01g003880 Sb03g039820 Sb03g035220 Sb10g002070 Sb07g021630 Sb04g002790 Sb09g022290 Sb01g039740
GO:0006520	P	cellular amino acid metabolic process	8	130	621	26245	0.013	0.018	Sb01g003880 Sb03g039820 Sb03g035220 Sb10g002070 Sb07g021630 Sb04g002790 Sb09g022290 Sb01g039740
GO:0048523	P	negative regulation of cellular process	10	130	898	26245	0.015	0.02	Sb03g026070 Sb03g006060 Sb03g039630 Sb01g049020 Sb02g022090 Sb01g039890 Sb08g005200 Sb10g026910 Sb08g005190 Sb09g030600
GO:0045449	P	regulation of transcription	22	130	2738	26245	0.016	0.022	Sb03g037740 Sb03g029920 Sb01g049020 Sb06g025710 Sb06g026410 Sb01g030570 Sb02g043620 Sb02g026570 Sb02g022280 Sb10g023010 Sb08g003760 Sb05g019540 Sb09g023920 Sb03g040355 Sb09g021580 Sb04g006970 Sb01g036810 Sb03g040970 Sb01g010070 Sb10g007090 Sb02g025080 Sb03g040510
GO:0009165	P	nucleotide biosynthetic process	5	130	293	26245	0.016	0.022	Sb10g025470 Sb07g007610 Sb06g031240 Sb01g048440 Sb01g017050
GO:0043412	P	macromolecule modification	22	130	2765	26245	0.018	0.024	Sb08g019700 Sb09g029080 Sb01g033570 Sb06g001720 Sb10g026910 Sb06g033990 Sb09g026860 Sb03g026070 Sb09g021410 Sb01g007120 Sb04g022410 Sb09g030600 Sb01g038750 Sb03g029890 Sb09g022410 Sb03g032740 Sb01g039740 Sb03g006060 Sb01g039890 Sb03g039630 Sb02g039640 Sb02g022090
GO:0019219	P	regulation of nucleobase, nucleoside, nucleotide and nucleic acid metabolic process	23	130	2930	26245	0.018	0.024	Sb03g037740 Sb04g002790 Sb03g029920 Sb01g049020 Sb06g025710 Sb06g026410 Sb01g030570 Sb02g043620 Sb02g026570 Sb02g022280 Sb10g023010 Sb08g003760 Sb05g019540 Sb09g023920 Sb03g040355 Sb09g021580 Sb04g006970 Sb01g036810 Sb03g040970 Sb01g010070 Sb10g007090 Sb02g025080 Sb03g040510
GO:0051171	P	regulation of nitrogen compound metabolic process	23	130	2975	26245	0.021	0.028	Sb03g037740 Sb04g002790 Sb03g029920 Sb01g049020 Sb06g025710 Sb06g026410 Sb01g030570 Sb02g043620 Sb02g026570 Sb02g022280 Sb10g023010 Sb08g003760 Sb05g019540 Sb09g023920 Sb03g040355 Sb09g021580 Sb04g006970 Sb01g036810 Sb03g040970 Sb01g010070 Sb10g007090 Sb02g025080 Sb03g040510
GO:0048580	P	regulation of post-embryonic development	5	130	319	26245	0.022	0.03	Sb08g019700 Sb01g007120 Sb02g025080 Sb01g010070 Sb01g049020
GO:0009308	P	amine metabolic process	9	130	827	26245	0.023	0.03	Sb01g003880 Sb03g039820 Sb03g035220 Sb10g002070 Sb02g028770 Sb07g021630 Sb04g002790 Sb09g022290 Sb01g039740
GO:0010556	P	regulation of macromolecule biosynthetic process	22	130	2879	26245	0.027	0.035	Sb03g037740 Sb03g029920 Sb01g049020 Sb06g025710 Sb06g026410 Sb01g030570 Sb02g043620 Sb02g026570 Sb02g022280 Sb10g023010 Sb08g003760 Sb05g019540 Sb09g023920 Sb03g040355 Sb09g021580 Sb04g006970 Sb01g036810 Sb03g040970 Sb01g010070 Sb10g007090 Sb02g025080 Sb03g040510
GO:0048518	P	positive regulation of biological process	12	130	1287	26245	0.027	0.035	Sb08g019700 Sb03g040355 Sb10g023010 Sb03g034680 Sb01g007120 Sb01g049020 Sb03g040510 Sb09g006700 Sb08g005200 Sb08g005190 Sb01g039740 Sb10g003810
GO:0048519	P	negative regulation of biological process	11	130	1175	26245	0.033	0.043	Sb03g026070 Sb03g006060 Sb03g039630 Sb02g025080 Sb01g049020 Sb02g022090 Sb01g039890 Sb08g005200 Sb10g026910 Sb08g005190 Sb09g030600
GO:0009791	P	post-embryonic development	14	130	1644	26245	0.034	0.044	Sb01g038760 Sb08g019700 Sb08g005190 Sb01g038750 Sb03g039820 Sb10g002070 Sb01g007120 Sb02g025080 Sb01g049020 Sb08g005200 Sb07g028940 Sb09g022290 Sb01g010070 Sb10g003810
GO:0042578	F	phosphoric ester hydrolase activity	16	130	507	26245	6.9e-09	1.5e-07	Sb09g026860 Sb03g040355 Sb09g022410 Sb09g029080 Sb08g005190 Sb01g010070 Sb03g029890 Sb03g026070 Sb06g001720 Sb03g039630 Sb09g030600 Sb02g022090 Sb01g039890 Sb08g005200 Sb03g032740 Sb09g002320
GO:0004721	F	phosphoprotein phosphatase activity	12	130	256	26245	9.4e-09	1.5e-07	Sb09g026860 Sb03g026070 Sb09g029080 Sb03g029890 Sb01g010070 Sb09g022410 Sb06g001720 Sb03g039630 Sb09g030600 Sb02g022090 Sb01g039890 Sb03g032740
GO:0016791	F	phosphatase activity	15	130	427	26245	5.3e-09	1.5e-07	Sb09g026860 Sb03g040355 Sb09g022410 Sb09g029080 Sb08g005190 Sb01g010070 Sb03g029890 Sb03g026070 Sb06g001720 Sb03g039630 Sb09g030600 Sb02g022090 Sb01g039890 Sb08g005200 Sb03g032740
GO:0004722	F	protein serinethreonine phosphatase activity	11	130	205	26245	1.1e-08	1.5e-07	Sb09g026860 Sb03g026070 Sb09g029080 Sb03g029890 Sb09g022410 Sb06g001720 Sb03g039630 Sb09g030600 Sb02g022090 Sb01g039890 Sb03g032740
GO:0043565	F	sequence-specific DNA binding	16	130	600	26245	6.7e-08	7.8e-07	Sb03g040970 Sb02g022280 Sb10g023010 Sb08g003760 Sb09g021580 Sb03g037740 Sb03g029920 Sb03g040510 Sb09g023920 Sb04g006970 Sb06g025710 Sb06g026410 Sb02g043620 Sb01g036810 Sb10g007090 Sb02g026570
GO:0016620	F	oxidoreductase activity, acting on the aldehyde or oxo group of donors, NAD or NADP as acceptor	8	130	104	26245	8.7e-08	8.4e-07	Sb01g005670 Sb08g004840 Sb03g039820 Sb05g005470 Sb07g021630 Sb02g025790 Sb02g005200 Sb09g022290
GO:0016903	F	oxidoreductase activity, acting on the aldehyde or oxo group of donors	8	130	145	26245	9.5e-07	7.9e-06	Sb01g005670 Sb08g004840 Sb03g039820 Sb05g005470 Sb07g021630 Sb02g025790 Sb02g005200 Sb09g022290
GO:0042277	F	peptide binding	5	130	76	26245	5.1e-05	0.00037	Sb02g038130 Sb02g003090 Sb01g005990 Sb02g022210 Sb10g022780
GO:0016614	F	oxidoreductase activity, acting on CH-OH group of donors	8	130	315	26245	0.00021	0.0011	Sb01g005670 Sb01g003880 Sb01g031520 Sb04g000320 Sb01g008730 Sb05g009350 Sb03g029570 Sb05g009360
GO:0016491	F	oxidoreductase activity	25	130	2349	26245	0.00022	0.0011	Sb01g038760 Sb08g004840 Sb05g005470 Sb02g025790 Sb04g021990 Sb04g004250 Sb05g001000 Sb01g008730 Sb03g029570 Sb05g009360 Sb07g022990 Sb01g003880 Sb10g027490 Sb01g005670 Sb07g021630 Sb02g005200 Sb06g018220 Sb01g031520 Sb03g039820 Sb0010s007790 Sb04g000320 Sb02g037780 Sb05g009350 Sb01g047540 Sb09g022290
GO:0003700	F	transcription factor activity	19	130	1522	26245	0.0002	0.0011	Sb03g040970 Sb02g022280 Sb10g023010 Sb08g003760 Sb09g021580 Sb03g037740 Sb02g025080 Sb03g029920 Sb03g040510 Sb09g023920 Sb04g006970 Sb06g025710 Sb06g026410 Sb01g030570 Sb02g043620 Sb01g036810 Sb01g049020 Sb10g007090 Sb02g026570
GO:0008194	F	UDP-glycosyltransferase activity	8	130	341	26245	0.00035	0.0017	Sb01g037090 Sb10g006330 Sb03g034680 Sb08g017750 Sb01g033060 Sb04g036240 Sb03g034880 Sb02g043450
GO:0035251	F	UDP-glucosyltransferase activity	5	130	157	26245	0.0013	0.0053	Sb08g017750 Sb01g033060 Sb03g034880 Sb10g006330 Sb03g034680
GO:0016788	F	hydrolase activity, acting on ester bonds	16	130	1360	26245	0.0012	0.0053	Sb09g026860 Sb03g040355 Sb09g022410 Sb09g029080 Sb08g005190 Sb01g010070 Sb03g029890 Sb03g026070 Sb06g001720 Sb03g039630 Sb09g030600 Sb02g022090 Sb01g039890 Sb08g005200 Sb03g032740 Sb09g002320
GO:0003682	F	chromatin binding	5	130	164	26245	0.0015	0.0059	Sb05g021820 Sb03g032530 Sb06g008585 Sb03g006450 Sb01g028870
GO:0046527	F	glucosyltransferase activity	5	130	183	26245	0.0024	0.0087	Sb08g017750 Sb01g033060 Sb03g034880 Sb10g006330 Sb03g034680
GO:0016616	F	oxidoreductase activity, acting on the CH-OH group of donors, NAD or NADP as acceptor	6	130	271	26245	0.0026	0.0087	Sb01g003880 Sb04g000320 Sb01g008730 Sb05g009350 Sb03g029570 Sb05g009360
GO:0016758	F	transferase activity, transferring hexosyl groups	9	130	595	26245	0.0031	0.01	Sb01g037090 Sb10g006330 Sb03g034680 Sb08g017750 Sb01g033060 Sb03g004540 Sb04g036240 Sb03g034880 Sb02g043450
GO:0030528	F	transcription regulator activity	20	130	2211	26245	0.0065	0.02	Sb03g040970 Sb02g022280 Sb10g023010 Sb08g003760 Sb09g021580 Sb03g037740 Sb02g025080 Sb03g029920 Sb03g040510 Sb09g023920 Sb04g006970 Sb06g025710 Sb06g026410 Sb01g030570 Sb02g043620 Sb01g036810 Sb01g049020 Sb01g010070 Sb10g007090 Sb02g026570
GO:0016684	F	oxidoreductase activity, acting on peroxide as acceptor	5	130	239	26245	0.0073	0.02	Sb01g038760 Sb04g004250 Sb0010s007790 Sb10g027490 Sb05g001000
GO:0004601	F	peroxidase activity	5	130	239	26245	0.0073	0.02	Sb01g038760 Sb04g004250 Sb0010s007790 Sb10g027490 Sb05g001000
GO:0016209	F	antioxidant activity	5	130	276	26245	0.013	0.033	Sb01g038760 Sb04g004250 Sb0010s007790 Sb10g027490 Sb05g001000
GO:0003677	F	DNA binding	25	130	3177	26245	0.013	0.033	Sb03g037740 Sb03g029920 Sb01g049020 Sb06g025710 Sb06g026410 Sb03g006450 Sb02g043620 Sb02g026570 Sb02g022280 Sb10g023010 Sb08g003760 Sb05g019540 Sb09g023920 Sb09g021580 Sb04g006970 Sb01g036810 Sb03g032530 Sb03g040970 Sb01g028870 Sb10g007090 Sb02g025080 Sb03g040510 Sb05g021820 Sb06g008585 Sb01g030570
GO:0016757	F	transferase activity, transferring glycosyl groups	9	130	768	26245	0.015	0.036	Sb01g037090 Sb10g006330 Sb03g034680 Sb08g017750 Sb01g033060 Sb03g004540 Sb04g036240 Sb03g034880 Sb02g043450
GO:0046872	F	metal ion binding	33	130	4609	26245	0.016	0.037	Sb01g038760 Sb09g029080 Sb06g001720 Sb07g007610 Sb10g026910 Sb09g030600 Sb02g005200 Sb04g004250 Sb03g026070 Sb03g029890 Sb05g001000 Sb01g039740 Sb01g008730 Sb03g029570 Sb05g009360 Sb02g030690 Sb07g022990 Sb10g027490 Sb01g048440 Sb10g025470 Sb01g039890 Sb03g032740 Sb09g002320 Sb03g034680 Sb01g005670 Sb01g031520 Sb01g028750 Sb02g037780 Sb03g039630 Sb01g017050 Sb02g022090 Sb05g009350 Sb06g031240
GO:0043169	F	cation binding	34	130	4835	26245	0.019	0.042	Sb01g038760 Sb09g029080 Sb06g001720 Sb07g007610 Sb10g026910 Sb09g030600 Sb02g005200 Sb04g004250 Sb03g026070 Sb03g029890 Sb05g001000 Sb01g039740 Sb01g008730 Sb03g029570 Sb05g009360 Sb02g030690 Sb07g022990 Sb10g027490 Sb01g048440 Sb10g025470 Sb01g039890 Sb03g032740 Sb09g002320 Sb03g034680 Sb01g005670 Sb01g031520 Sb09g022410 Sb01g028750 Sb02g037780 Sb03g039630 Sb01g017050 Sb02g022090 Sb05g009350 Sb0…
GO:0043167	F	ion binding	34	130	4862	26245	0.02	0.043	Sb01g038760 Sb09g029080 Sb06g001720 Sb07g007610 Sb10g026910 Sb09g030600 Sb02g005200 Sb04g004250 Sb03g026070 Sb03g029890 Sb05g001000 Sb01g039740 Sb01g008730 Sb03g029570 Sb05g009360 Sb02g030690 Sb07g022990 Sb10g027490 Sb01g048440 Sb10g025470 Sb01g039890 Sb03g032740 Sb09g002320 Sb03g034680 Sb01g005670 Sb01g031520 Sb09g022410 Sb01g028750 Sb02g037780 Sb03g039630 Sb01g017050 Sb02g022090 Sb05g009350 Sb0…
GO:0009570	C	chloroplast stroma	10	130	142	26245	4.4e-09	1.6e-07	Sb01g038760 Sb08g005190 Sb01g005990 Sb07g028940 Sb02g003090 Sb01g031870 Sb08g005200 Sb02g038130 Sb10g022780 Sb02g022210
GO:0009532	C	plastid stroma	10	130	191	26245	6.4e-08	1.2e-06	Sb01g038760 Sb08g005190 Sb01g005990 Sb07g028940 Sb02g003090 Sb01g031870 Sb08g005200 Sb02g038130 Sb10g022780 Sb02g022210
GO:0005886	C	plasma membrane	25	130	1557	26245	2e-07	2.5e-06	Sb01g038760 Sb09g003060 Sb01g005990 Sb02g028770 Sb07g007610 Sb02g038130 Sb02g008820 Sb01g008730 Sb02g003090 Sb03g034880 Sb05g009360 Sb01g048440 Sb10g025470 Sb07g028940 Sb09g002320 Sb10g006330 Sb0010s007790 Sb01g028750 Sb05g009350 Sb01g033060 Sb01g031870 Sb01g047540 Sb10g022780 Sb06g031240 Sb02g022210
GO:0048046	C	apoplast	8	130	191	26245	6.7e-06	6.2e-05	Sb05g027870 Sb05g001000 Sb01g005990 Sb02g003090 Sb03g029570 Sb02g038130 Sb10g022780 Sb02g022210
GO:0005773	C	vacuole	11	130	413	26245	8.5e-06	6.3e-05	Sb10g006330 Sb08g004840 Sb01g048440 Sb10g025470 Sb01g017050 Sb07g028940 Sb05g005470 Sb01g033060 Sb07g007610 Sb01g047540 Sb06g031240
GO:0044434	C	chloroplast part	13	130	729	26245	7.9e-05	0.00049	Sb01g038760 Sb08g005190 Sb01g005990 Sb07g028940 Sb02g003090 Sb04g036240 Sb01g031870 Sb08g005200 Sb02g038130 Sb05g027870 Sb10g022780 Sb09g028710 Sb02g022210
GO:0044435	C	plastid part	13	130	793	26245	0.00018	0.00095	Sb01g038760 Sb08g005190 Sb01g005990 Sb07g028940 Sb02g003090 Sb04g036240 Sb01g031870 Sb08g005200 Sb02g038130 Sb05g027870 Sb10g022780 Sb09g028710 Sb02g022210
GO:0009507	C	chloroplast	20	130	1831	26245	0.00074	0.0034	Sb01g038760 Sb06g018220 Sb10g022780 Sb08g005190 Sb08g004840 Sb03g039820 Sb03g004540 Sb05g005470 Sb01g005990 Sb07g028940 Sb02g003090 Sb04g036240 Sb01g031870 Sb08g005200 Sb03g029570 Sb02g038130 Sb05g027870 Sb09g022290 Sb09g028710 Sb02g022210
GO:0009941	C	chloroplast envelope	5	130	167	26245	0.0017	0.0068	Sb05g027870 Sb04g036240 Sb01g031870 Sb09g028710 Sb07g028940
GO:0009526	C	plastid envelope	5	130	193	26245	0.003	0.011	Sb05g027870 Sb04g036240 Sb01g031870 Sb09g028710 Sb07g028940
GO:0016020	C	membrane	42	130	5733	26245	0.0038	0.012	Sb01g038760 Sb08g004840 Sb05g005470 Sb09g003060 Sb01g005990 Sb02g028770 Sb07g007610 Sb02g038130 Sb03g032290 Sb05g027870 Sb03g034680 Sb02g008820 Sb01g008730 Sb02g003090 Sb01g011020 Sb03g029570 Sb01g038670 Sb03g034880 Sb05g009360 Sb01g048440 Sb10g025470 Sb07g028940 Sb04g036240 Sb09g002320 Sb06g018220 Sb10g022780 Sb10g006330 Sb01g010070 Sb03g039820 Sb0010s007790 Sb01g028750 Sb08g017750 Sb02g037780 S…
GO:0009536	C	plastid	20	130	2109	26245	0.0039	0.012	Sb01g038760 Sb06g018220 Sb10g022780 Sb08g005190 Sb08g004840 Sb03g039820 Sb03g004540 Sb05g005470 Sb01g005990 Sb07g028940 Sb02g003090 Sb04g036240 Sb01g031870 Sb08g005200 Sb03g029570 Sb02g038130 Sb05g027870 Sb09g022290 Sb09g028710 Sb02g022210

## Sheet: Most enriched 41 Go-terms or en
Table S2. The GO-terms and associated accessions enriched for drought and related stresses
GO_acc	term_type	Term	queryitem	querytotal	bgitem	bgtotal	pvalue	FDR	entries
GO:0009414	P	response to water deprivation	56	130	374	26245	1.9e-65	2e-63	Sb08g019700 Sb08g004840 Sb01g019850 Sb05g005470 Sb09g003060 Sb01g005990 Sb02g028770 Sb07g007610 Sb10g026910 Sb02g038130 Sb09g030600 Sb04g004250 Sb03g026070 Sb10g023010 Sb03g034680 Sb02g003090 Sb01g007120 Sb01g039740 Sb03g004540 Sb01g047540 Sb02g025790 Sb07g022990 Sb07g024160 Sb01g003880 Sb10g027490 Sb01g048440 Sb10g025470 Sb04g006970 Sb01g039890 Sb04g036240 Sb08g005200 Sb03g006060 Sb10g022780 Sb0…
GO:0009628	P	response to abiotic stimulus	75	130	2423	26245	6.6e-43	4.7e-41	Sb01g038760 Sb08g019700 Sb04g002790 Sb08g004840 Sb01g019850 Sb01g033570 Sb09g003060 Sb01g005990 Sb01g049020 Sb06g025710 Sb07g007610 Sb10g026910 Sb02g038130 Sb09g030600 Sb02g008820 Sb10g003810 Sb04g004250 Sb03g026070 Sb10g023010 Sb03g034680 Sb03g004540 Sb10g022780 Sb01g007120 Sb01g033060 Sb04g022410 Sb01g039740 Sb01g008730 Sb02g003090 Sb05g005470 Sb01g047540 Sb03g029570 Sb02g025790 Sb05g009360 Sb0…
GO:0042221	P	response to chemical stimulus	80	130	3244	26245	2.1e-39	1.1e-37	Sb01g038760 Sb08g019700 Sb08g004840 Sb01g019850 Sb05g005470 Sb06g001720 Sb01g005990 Sb02g028770 Sb07g007610 Sb10g026910 Sb03g038600 Sb02g038130 Sb10g022200 Sb09g030600 Sb02g008820 Sb10g003810 Sb04g004250 Sb03g026070 Sb10g023010 Sb03g034680 Sb03g004540 Sb05g001000 Sb01g007120 Sb01g033060 Sb01g039740 Sb01g008730 Sb02g003090 Sb01g031870 Sb01g047540 Sb04g021990 Sb02g025790 Sb09g003060 Sb05g009360 Sb0…
GO:0006970	P	response to osmotic stress	43	130	631	26245	5.6e-36	2.4e-34	Sb01g038760 Sb08g019700 Sb04g002790 Sb08g004840 Sb01g033570 Sb09g003060 Sb02g028770 Sb10g026910 Sb09g030600 Sb10g003810 Sb04g004250 Sb03g026070 Sb03g034680 Sb01g007120 Sb01g033060 Sb04g022410 Sb01g039740 Sb01g008730 Sb05g005470 Sb03g029570 Sb05g009360 Sb03g040355 Sb10g027490 Sb01g038750 Sb02g025790 Sb10g002070 Sb07g028940 Sb04g036240 Sb08g005200 Sb10g006330 Sb09g002320 Sb03g030100 Sb08g005190 Sb0…
GO:0006950	P	response to stress	80	130	3705	26245	2.8e-35	1e-33	Sb01g038760 Sb08g019700 Sb04g002790 Sb08g004840 Sb01g019850 Sb01g033570 Sb09g003060 Sb01g005990 Sb02g028770 Sb06g025710 Sb07g007610 Sb10g026910 Sb02g038130 Sb10g022780 Sb09g030600 Sb02g008820 Sb10g003810 Sb04g004250 Sb01g035380 Sb10g023010 Sb03g034680 Sb03g004540 Sb05g001000 Sb01g007120 Sb01g033060 Sb04g022410 Sb01g039740 Sb01g008730 Sb02g003090 Sb05g005470 Sb01g031870 Sb01g047540 Sb04g021990 Sb0…
GO:0009737	P	response to abscisic acid stimulus	40	130	664	26245	2.1e-31	6.5e-30	Sb08g019700 Sb08g004840 Sb05g005470 Sb06g001720 Sb07g007610 Sb10g026910 Sb03g038600 Sb01g028330 Sb09g030600 Sb10g022200 Sb03g026070 Sb10g023010 Sb01g007120 Sb01g039740 Sb03g004540 Sb10g003810 Sb09g003060 Sb01g038150 Sb02g025790 Sb01g048440 Sb10g025470 Sb10g002070 Sb01g039890 Sb08g005200 Sb08g005190 Sb09g002320 Sb03g006060 Sb09g023180 Sb03g039820 Sb0010s007790 Sb03g039630 Sb02g025080 Sb02g022090 S…
GO:0009651	P	response to salt stress	36	130	536	26245	1e-29	2.7e-28	Sb01g038760 Sb08g019700 Sb04g002790 Sb08g004840 Sb01g033570 Sb09g003060 Sb02g028770 Sb10g026910 Sb10g003810 Sb04g004250 Sb01g007120 Sb04g022410 Sb09g002320 Sb01g008730 Sb05g005470 Sb03g029570 Sb05g009360 Sb10g027490 Sb02g025790 Sb10g002070 Sb07g028940 Sb04g036240 Sb08g005200 Sb01g039740 Sb03g030100 Sb08g005190 Sb03g039820 Sb01g028750 Sb08g017750 Sb02g037780 Sb02g039640 Sb02g025080 Sb05g009350 Sb0…
GO:0009266	P	response to temperature stimulus	38	130	902	26245	2e-24	4.2e-23	Sb01g038760 Sb09g003060 Sb01g005990 Sb02g028770 Sb06g025710 Sb10g026910 Sb02g038130 Sb10g003810 Sb04g004250 Sb03g026070 Sb10g023010 Sb01g033060 Sb09g030600 Sb02g003090 Sb03g029570 Sb01g003880 Sb10g027490 Sb10g002070 Sb07g028940 Sb01g039890 Sb04g036240 Sb08g005200 Sb10g006330 Sb01g049020 Sb05g027870 Sb09g002320 Sb03g030100 Sb01g037090 Sb08g005190 Sb01g028750 Sb02g037780 Sb03g039630 Sb02g022090 Sb0…
GO:0009409	P	response to cold	32	130	625	26245	6.1e-23	1.2e-21	Sb09g003060 Sb01g005990 Sb01g049020 Sb10g026910 Sb02g038130 Sb10g003810 Sb04g004250 Sb03g026070 Sb05g027870 Sb01g033060 Sb09g030600 Sb02g003090 Sb03g029570 Sb10g027490 Sb10g002070 Sb01g039890 Sb04g036240 Sb08g005200 Sb10g006330 Sb09g002320 Sb03g030100 Sb01g037090 Sb08g005190 Sb01g028750 Sb02g037780 Sb03g039630 Sb02g022090 Sb03g040510 Sb01g031870 Sb09g028710 Sb02g043450 Sb02g022210
GO:0055114	P	oxidation reduction	25	130	352	26245	3.4e-21	5.5e-20	Sb01g038760 Sb08g004840 Sb05g005470 Sb02g025790 Sb04g021990 Sb04g004250 Sb03g026070 Sb05g001000 Sb09g030600 Sb01g008730 Sb05g009360 Sb07g022990 Sb01g003880 Sb10g027490 Sb01g005670 Sb07g021630 Sb02g005200 Sb06g018220 Sb01g031520 Sb03g039820 Sb0010s007790 Sb04g000320 Sb02g037780 Sb05g009350 Sb09g022290
GO:0009738	P	abscisic acid mediated signaling pathway	20	130	192	26245	3.9e-20	6e-19	Sb08g019700 Sb03g026070 Sb03g006060 Sb09g023180 Sb0010s007790 Sb03g039630 Sb01g007120 Sb09g030600 Sb02g022090 Sb01g039890 Sb09g006700 Sb08g005200 Sb04g008040 Sb10g026910 Sb03g038600 Sb08g005190 Sb01g028330 Sb01g039740 Sb10g022200 Sb01g038150
GO:0009719	P	response to endogenous stimulus	44	130	1755	26245	9.1e-20	1.2e-18	Sb08g019700 Sb08g004840 Sb05g005470 Sb06g001720 Sb02g028770 Sb07g007610 Sb10g026910 Sb03g038600 Sb01g028330 Sb09g030600 Sb10g022200 Sb03g026070 Sb10g023010 Sb01g007120 Sb05g019540 Sb01g039740 Sb03g004540 Sb10g003810 Sb09g003060 Sb01g038150 Sb03g040355 Sb02g025790 Sb01g048440 Sb10g025470 Sb10g002070 Sb01g039890 Sb04g036240 Sb08g005200 Sb08g005190 Sb09g002320 Sb03g006060 Sb09g023180 Sb03g039820 Sb0…
GO:0042631	P	cellular response to water deprivation	8	130	12	26245	3.4e-14	3.4e-13	Sb0010s007790 Sb01g005990 Sb02g003090 Sb02g022210 Sb02g038130 Sb10g022780 Sb09g028710 Sb03g030100
GO:0009755	P	hormone-mediated signaling pathway	23	130	608	26245	6.5e-14	6.3e-13	Sb08g019700 Sb10g026910 Sb02g025790 Sb03g038600 Sb01g028330 Sb10g022200 Sb03g026070 Sb10g023010 Sb01g007120 Sb09g030600 Sb03g006060 Sb01g038150 Sb03g040355 Sb01g039890 Sb08g005200 Sb09g023180 Sb01g039740 Sb08g005190 Sb0010s007790 Sb03g039630 Sb02g022090 Sb09g006700 Sb04g008040
GO:0032870	P	cellular response to hormone stimulus	23	130	627	26245	1.2e-13	1.1e-12	Sb08g019700 Sb10g026910 Sb02g025790 Sb03g038600 Sb01g028330 Sb10g022200 Sb03g026070 Sb10g023010 Sb01g007120 Sb09g030600 Sb03g006060 Sb01g038150 Sb03g040355 Sb01g039890 Sb08g005200 Sb09g023180 Sb01g039740 Sb08g005190 Sb0010s007790 Sb03g039630 Sb02g022090 Sb09g006700 Sb04g008040
GO:0010118	P	stomatal movement	14	130	189	26245	1.6e-12	1.4e-11	Sb08g019700 Sb01g028750 Sb01g048440 Sb03g026070 Sb10g025470 Sb03g039630 Sb01g007120 Sb09g030600 Sb02g022090 Sb01g039890 Sb07g007610 Sb10g026910 Sb05g021820 Sb06g031240
GO:0006979	P	response to oxidative stress	21	130	605	26245	4.3e-12	3.7e-11	Sb01g038760 Sb02g022210 Sb01g005990 Sb10g027490 Sb02g025790 Sb03g039820 Sb0010s007790 Sb05g001000 Sb10g002070 Sb10g022780 Sb02g003090 Sb01g037090 Sb04g021990 Sb10g026910 Sb02g038130 Sb10g023010 Sb02g005200 Sb09g022290 Sb02g043450 Sb10g003810 Sb04g004250
GO:0009269	P	response to desiccation	10	130	71	26245	8.3e-12	6.8e-11	Sb04g004250 Sb10g027490 Sb08g004840 Sb03g039820 Sb05g005470 Sb02g008820 Sb01g031870 Sb07g024160 Sb02g025790 Sb09g022290
GO:0010119	P	regulation of stomatal movement	11	130	133	26245	1.5e-10	1e-09	Sb08g019700 Sb03g026070 Sb01g048440 Sb10g025470 Sb03g039630 Sb01g007120 Sb09g030600 Sb02g022090 Sb01g039890 Sb07g007610 Sb06g031240
GO:0009966	P	regulation of signal transduction	13	130	311	26245	8.2e-09	5.2e-08	Sb08g019700 Sb03g026070 Sb08g005190 Sb01g038750 Sb03g039630 Sb01g007120 Sb09g030600 Sb02g022090 Sb01g039890 Sb09g006700 Sb08g005200 Sb03g006060 Sb01g039740
GO:0007242	P	intracellular signaling cascade	26	130	1430	26245	9.4e-09	5.7e-08	Sb08g019700 Sb10g026910 Sb02g025790 Sb03g038600 Sb01g028330 Sb10g022200 Sb03g006060 Sb10g023010 Sb01g007120 Sb09g030600 Sb10g003810 Sb01g038150 Sb03g040355 Sb01g003880 Sb01g038750 Sb03g026070 Sb01g039890 Sb08g005200 Sb08g005190 Sb01g039740 Sb09g023180 Sb0010s007790 Sb03g039630 Sb02g022090 Sb09g006700 Sb04g008040
GO:0044262	P	cellular carbohydrate metabolic process	19	130	809	26245	2.6e-08	1.5e-07	Sb04g004690 Sb01g035380 Sb01g005670 Sb01g037090 Sb10g006330 Sb03g034680 Sb01g019850 Sb08g017750 Sb02g037780 Sb01g007120 Sb08g019700 Sb01g017050 Sb03g004540 Sb01g033060 Sb03g029570 Sb01g047500 Sb01g047540 Sb03g034880 Sb02g043450
GO:0033554	P	cellular response to stress	17	130	686	26245	7.1e-08	3.8e-07	Sb01g038760 Sb02g022210 Sb10g023010 Sb01g038750 Sb0010s007790 Sb08g017750 Sb01g005990 Sb02g003090 Sb04g036240 Sb03g030100 Sb10g003810 Sb10g026910 Sb02g038130 Sb10g022780 Sb09g028710 Sb01g039740 Sb04g021990
GO:0009688	P	abscisic acid biosynthetic process	5	130	26	26245	4.1e-07	1.8e-06	Sb01g005670 Sb06g018220 Sb01g003880 Sb03g034680 Sb10g026910
GO:0005975	P	carbohydrate metabolic process	23	130	1452	26245	8.4e-07	3e-06	Sb08g019700 Sb01g019850 Sb02g028770 Sb04g004690 Sb01g035380 Sb03g034680 Sb01g007120 Sb03g004540 Sb04g030950 Sb03g029570 Sb03g034880 Sb01g045920 Sb03g030100 Sb01g005670 Sb01g037090 Sb10g006330 Sb08g017750 Sb02g037780 Sb01g017050 Sb01g033060 Sb01g047500 Sb01g047540 Sb02g043450
GO:0009408	P	response to heat	11	130	324	26245	8.9e-07	3.2e-06	Sb01g038760 Sb03g026070 Sb01g003880 Sb10g023010 Sb02g028770 Sb06g025710 Sb01g037090 Sb10g026910 Sb07g028940 Sb09g030600 Sb02g043450
GO:0009687	P	abscisic acid metabolic process	5	130	32	26245	1e-06	3.6e-06	Sb01g005670 Sb06g018220 Sb01g003880 Sb03g034680 Sb10g026910
GO:0000302	P	response to reactive oxygen species	9	130	203	26245	1.1e-06	3.8e-06	Sb01g038760 Sb01g037090 Sb10g023010 Sb02g025790 Sb0010s007790 Sb10g003810 Sb10g026910 Sb02g043450 Sb04g021990
GO:0042578	F	phosphoric ester hydrolase activity	16	130	507	26245	6.9e-09	1.5e-07	Sb09g026860 Sb03g040355 Sb09g022410 Sb09g029080 Sb08g005190 Sb01g010070 Sb03g029890 Sb03g026070 Sb06g001720 Sb03g039630 Sb09g030600 Sb02g022090 Sb01g039890 Sb08g005200 Sb03g032740 Sb09g002320
GO:0004721	F	phosphoprotein phosphatase activity	12	130	256	26245	9.4e-09	1.5e-07	Sb09g026860 Sb03g026070 Sb09g029080 Sb03g029890 Sb01g010070 Sb09g022410 Sb06g001720 Sb03g039630 Sb09g030600 Sb02g022090 Sb01g039890 Sb03g032740
GO:0016791	F	phosphatase activity	15	130	427	26245	5.3e-09	1.5e-07	Sb09g026860 Sb03g040355 Sb09g022410 Sb09g029080 Sb08g005190 Sb01g010070 Sb03g029890 Sb03g026070 Sb06g001720 Sb03g039630 Sb09g030600 Sb02g022090 Sb01g039890 Sb08g005200 Sb03g032740
GO:0004722	F	protein serinethreonine phosphatase activity	11	130	205	26245	1.1e-08	1.5e-07	Sb09g026860 Sb03g026070 Sb09g029080 Sb03g029890 Sb09g022410 Sb06g001720 Sb03g039630 Sb09g030600 Sb02g022090 Sb01g039890 Sb03g032740
GO:0043565	F	sequence-specific DNA binding	16	130	600	26245	6.7e-08	7.8e-07	Sb03g040970 Sb02g022280 Sb10g023010 Sb08g003760 Sb09g021580 Sb03g037740 Sb03g029920 Sb03g040510 Sb09g023920 Sb04g006970 Sb06g025710 Sb06g026410 Sb02g043620 Sb01g036810 Sb10g007090 Sb02g026570
GO:0042277	F	peptide binding	5	130	76	26245	5.1e-05	0.00037	Sb02g038130 Sb02g003090 Sb01g005990 Sb02g022210 Sb10g022780
GO:0009570	C	chloroplast stroma	10	130	142	26245	4.4e-09	1.6e-07	Sb01g038760 Sb08g005190 Sb01g005990 Sb07g028940 Sb02g003090 Sb01g031870 Sb08g005200 Sb02g038130 Sb10g022780 Sb02g022210
GO:0009532	C	plastid stroma	10	130	191	26245	6.4e-08	1.2e-06	Sb01g038760 Sb08g005190 Sb01g005990 Sb07g028940 Sb02g003090 Sb01g031870 Sb08g005200 Sb02g038130 Sb10g022780 Sb02g022210
GO:0005886	C	plasma membrane	25	130	1557	26245	2e-07	2.5e-06	Sb01g038760 Sb09g003060 Sb01g005990 Sb02g028770 Sb07g007610 Sb02g038130 Sb02g008820 Sb01g008730 Sb02g003090 Sb03g034880 Sb05g009360 Sb01g048440 Sb10g025470 Sb07g028940 Sb09g002320 Sb10g006330 Sb0010s007790 Sb01g028750 Sb05g009350 Sb01g033060 Sb01g031870 Sb01g047540 Sb10g022780 Sb06g031240 Sb02g022210
GO:0048046	C	apoplast	8	130	191	26245	6.7e-06	6.2e-05	Sb05g027870 Sb05g001000 Sb01g005990 Sb02g003090 Sb03g029570 Sb02g038130 Sb10g022780 Sb02g022210
GO:0005773	C	vacuole	11	130	413	26245	8.5e-06	6.3e-05	Sb10g006330 Sb08g004840 Sb01g048440 Sb10g025470 Sb01g017050 Sb07g028940 Sb05g005470 Sb01g033060 Sb07g007610 Sb01g047540 Sb06g031240
GO:0044434	C	chloroplast part	13	130	729	26245	7.9e-05	0.00049	Sb01g038760 Sb08g005190 Sb01g005990 Sb07g028940 Sb02g003090 Sb04g036240 Sb01g031870 Sb08g005200 Sb02g038130 Sb05g027870 Sb10g022780 Sb09g028710 Sb02g022210
GO:0044435	C	plastid part	13	130	793	26245	0.00018	0.00095	Sb01g038760 Sb08g005190 Sb01g005990 Sb07g028940 Sb02g003090 Sb04g036240 Sb01g031870 Sb08g005200 Sb02g038130 Sb05g027870 Sb10g022780 Sb09g028710 Sb02g022210

## Sheet: Annotated enteries
Table S1. Description of annotated entries
Sb03g029570.1	GO:0031998 GO:0005777 GO:0006096 GO:0005759 GO:0006099 GO:0030060 GO:0005488 GO:0009409 GO:0006108
Sb04g030950.1	GO:0009535 GO:0008974 GO:0005524 GO:0005515 GO:0009409 GO:0019253
Sb04g030950.2	GO:0009535 GO:0008974 GO:0005524 GO:0005515 GO:0009409 GO:0019253
Sb04g028550.1	GO:0018106 GO:0009884 GO:0009737 GO:0010086 GO:0010150 GO:0000160 GO:0000156 GO:0005886 GO:0010271 GO:0004721 GO:0005034 GO:0006355 GO:0010029 GO:0009414 GO:0000155 GO:0009409 GO:0009651 GO:0048831 GO:0005524 GO:0009736
Sb05g004590.1	GO:0009570 GO:0010287 GO:0005739 GO:0006096 GO:0006098 GO:0004332 GO:0006979
Sb03g008050.1	GO:0009570 GO:0010287 GO:0005739 GO:0006096 GO:0006098 GO:0004332 GO:0006979
Sb10g003810.1	GO:0000169 GO:0000746 GO:0010200 GO:0042542 GO:0051301 GO:0009738 GO:0009864 GO:0004707 GO:0004713 GO:0005515 GO:0048481 GO:0009409 GO:0009651 GO:0007067 GO:0009723 GO:0005524
Sb05g014470.2	GO:0004013 GO:0006950 GO:0006346 GO:0009793 GO:0005488 GO:0016441 GO:0006730
Sb01g010280.1	GO:0009590 GO:0009570 GO:0005829 GO:0000287 GO:0004614 GO:0009409 GO:0006006 GO:0019252
Sb05g009360.1	GO:0005737 GO:0055114 GO:0004022 GO:0008270
Sb03g034880.1	GO:0003843 GO:0000148 GO:0009556 GO:0009863 GO:0009620 GO:0009965 GO:0010208 GO:0006075 GO:0009870 GO:0009504
Sb02g029780.1	GO:0009792 GO:0009414 GO:0009788 GO:0002009 GO:0030548 GO:0005965 GO:0005634 GO:0006075 GO:0004311 GO:0040035 GO:0045213 GO:0005953 GO:0010171 GO:0007179 GO:0040011 GO:0018991 GO:0018347 GO:0018348 GO:0005829 GO:0008360 GO:0004663 GO:0004660 GO:0046982 GO:0048509
Sb04g004690.1	GO:0005829 GO:0005739 GO:0019253 GO:0009409 GO:0004618 GO:0006096 GO:0005524 GO:0009507
Sb04g004690.2	GO:0005829 GO:0005739 GO:0019253 GO:0009409 GO:0004618 GO:0006096 GO:0005524 GO:0009507
Sb09g022290.2	GO:0005811 GO:0042538 GO:0006561 GO:0004349 GO:0016020 GO:0005739 GO:0003842 GO:0004350 GO:0017084 GO:0009269 GO:0009737
Sb09g022290.1	GO:0005811 GO:0042538 GO:0006561 GO:0004349 GO:0016020 GO:0005739 GO:0003842 GO:0004350 GO:0017084 GO:0009269 GO:0009737
Sb01g035380.1	GO:0005795 GO:0050662 GO:0009832 GO:0046369 GO:0009555 GO:0009969 GO:0005829 GO:0010053 GO:0010246 GO:0006950 GO:0012505 GO:0046983 GO:0003978 GO:0010306
Sb04g036040.1	GO:0042624 GO:0015992 GO:0005515 GO:0016021 GO:0000287 GO:0010119 GO:0009414 GO:0005886 GO:0009737 GO:0008553 GO:0006754 GO:0005524
Sb04g036240.1	GO:0005975 GO:0009706 GO:0030246 GO:0009707 GO:0009790 GO:0016036 GO:0046509 GO:0010027 GO:0019375 GO:0030259 GO:0042802
Sb02g004310.1	GO:0010204 GO:0050661 GO:0050660 GO:0005792 GO:0004499 GO:0009627 GO:0009626 GO:0050832 GO:0009870 GO:0042742 GO:0031227
Sb02g043450.1	GO:0047216 GO:0009408 GO:0009644 GO:0016051 GO:0042542
Sb09g022410.1	GO:0008287 GO:0005515 GO:0006470 GO:0004722 GO:0010119 GO:0009414 GO:0009409 GO:0009788 GO:0046872
Sb01g003880.1	GO:0006561 GO:0005829 GO:0010301 GO:0010182 GO:0005488 GO:0009414 GO:0010115 GO:0009408
Sb04g003480.1	GO:0006468 GO:0007623 GO:0042542 GO:0009734 GO:0009864 GO:0004707 GO:0004713 GO:0048481 GO:0009409 GO:0009651 GO:0009723 GO:0005524
Sb03g040355.1	GO:0009628 GO:0006461 GO:0019204 GO:0006470 GO:0005634 GO:0009738 GO:0004721 GO:0003725 GO:0005515 GO:0016481
Sb01g038750.1	GO:0000169 GO:0000746 GO:0010200 GO:0042542 GO:0051301 GO:0009738 GO:0009864 GO:0004707 GO:0004713 GO:0005515 GO:0048481 GO:0009409 GO:0009651 GO:0007067 GO:0009723 GO:0005524
Sb01g038750.2	GO:0000169 GO:0000746 GO:0010200 GO:0042542 GO:0051301 GO:0009738 GO:0009864 GO:0004707 GO:0004713 GO:0005515 GO:0048481 GO:0009409 GO:0009651 GO:0007067 GO:0009723 GO:0005524
Sb10g027490.1	GO:0042538 GO:0005783 GO:0020037 GO:0005634 GO:0006979 GO:0009269 GO:0004601 GO:0005509 GO:0016757 GO:0009409 GO:0009505 GO:0009055
Sb10g002070.1	GO:0009446 GO:0009737 GO:0009753 GO:0008792 GO:0000287 GO:0006527 GO:0009611 GO:0009651 GO:0048316 GO:0006979 GO:0008295
Sb03g045860.1	GO:0016740 GO:0050896
Sb01g005670.1	GO:0009688 GO:0007595 GO:0005829 GO:0051537 GO:0010293 GO:0009851 GO:0050660 GO:0030856 GO:0003676 GO:0004855 GO:0004854 GO:0005506 GO:0050302 GO:0055114 GO:0009055
Sb10g025470.1	GO:0042624 GO:0015992 GO:0005515 GO:0016021 GO:0000287 GO:0010119 GO:0009414 GO:0005886 GO:0009737 GO:0008553 GO:0006754 GO:0005524
Sb04g021990.2	GO:0009409 GO:0045454 GO:0051920 GO:0009507
Sb04g021990.1	GO:0009409 GO:0045454 GO:0051920 GO:0009507
Sb01g038760.1	GO:0030955 GO:0020037 GO:0005829 GO:0009793 GO:0042744 GO:0005509 GO:0016688 GO:0009408 GO:0009055
Sb10g006330.1	GO:0009058 GO:0009877 GO:0016157 GO:0005985
Sb10g006330.2	GO:0009058 GO:0009877 GO:0016157 GO:0005985
Sb10g006330.3	GO:0009058 GO:0009877 GO:0016157 GO:0005985
Sb01g019850.1	GO:0043169 GO:0005983 GO:0009570 GO:0016161 GO:0009409 GO:0000024
Sb02g005200.1	GO:0006574 GO:0004028 GO:0016790 GO:0019484 GO:0006210 GO:0005739 GO:0000062 GO:0018478 GO:0004491 GO:0006979
Sb07g022990.1	GO:0009826 GO:0046345 GO:0019825 GO:0005783 GO:0020037 GO:0016132 GO:0009911 GO:0010268 GO:0048838 GO:0012505 GO:0009414 GO:0010114 GO:0010295 GO:0051777 GO:0010224 GO:0009055
Sb01g047500.1	GO:0043169 GO:0005983 GO:0009570 GO:0016161 GO:0009409 GO:0000024
Sb10g022780.1	GO:0005737 GO:0042631 GO:0004364 GO:0006979 GO:0009407
Sb02g025790.1	GO:0004028 GO:0006081 GO:0007605 GO:0009737 GO:0005739 GO:0009269 GO:0009651 GO:0004029
Sb06g012520.1	GO:0051607 GO:0046914 GO:0009695 GO:0006636 GO:0042742 GO:0004768 GO:0045300 GO:0009507
Sb08g005200.1	GO:0004437 GO:0009968 GO:0008441 GO:0016481 GO:0009738 GO:0043229 GO:0044444 GO:0006790 GO:0006401 GO:0009409 GO:0043157 GO:0048015
Sb07g007610.1	GO:0042624 GO:0015992 GO:0005515 GO:0016021 GO:0000287 GO:0010119 GO:0009414 GO:0005886 GO:0009737 GO:0008553 GO:0006754 GO:0005524
Sb01g048440.1	GO:0042624 GO:0015992 GO:0005515 GO:0016021 GO:0000287 GO:0010119 GO:0009414 GO:0005886 GO:0009737 GO:0008553 GO:0006754 GO:0005524
Sb01g047930.1	GO:0016126 GO:0009825 GO:0005783 GO:0005634 GO:0042023 GO:0045335 GO:0006972 GO:0003838 GO:0010051
Sb02g022210.1	GO:0005737 GO:0004364 GO:0009407
Sb01g033060.1	GO:0009058 GO:0046524 GO:0016157 GO:0005985 GO:0009877
Sb03g039820.2	GO:0009737 GO:0006561 GO:0004349 GO:0005811 GO:0005739 GO:0003842 GO:0004350 GO:0017084 GO:0009269 GO:0042538
Sb08g017600.1	GO:0019861 GO:0009734 GO:0042542 GO:0006228 GO:0005634 GO:0000287 GO:0006241 GO:0005743 GO:0009411 GO:0004550 GO:0005524 GO:0005515 GO:0009507 GO:0006183 GO:0009585
Sb03g039820.1	GO:0009737 GO:0006561 GO:0005743 GO:0005811 GO:0004350 GO:0003842 GO:0004349 GO:0017084 GO:0009269 GO:0042538
Sb03g035220.2	GO:0030170 GO:0010150 GO:0005829 GO:0016020 GO:0005739 GO:0044248 GO:0004069 GO:0009067 GO:0006531 GO:0009409 GO:0009507
Sb10g026910.1	GO:0030170 GO:0009688 GO:0010118 GO:0043545 GO:0010182 GO:0009734 GO:0030151 GO:0018315 GO:0008265 GO:0006727 GO:0009000 GO:0009408 GO:0009409 GO:0009651 GO:0042742
Sb02g004440.1	GO:0005829 GO:0015937 GO:0005634 GO:0004595 GO:0005524 GO:0004140
Sb02g037780.1	GO:0002119 GO:0007420 GO:0032981 GO:0019915 GO:0048146 GO:0009631 GO:0008137 GO:0006120 GO:0051591 GO:0006970 GO:0005747 GO:0019933 GO:0009792 GO:0006800 GO:0001932 GO:0040007
Sb02g024910.1	GO:0006631 GO:0005634 GO:0005886 GO:0010119 GO:0005739 GO:0009845 GO:0005509 GO:0009414 GO:0009651 GO:0046466 GO:0004630 GO:0009789 GO:0046470 GO:0030136
Sb04g000320.2	GO:0008266 GO:0051287 GO:0005777 GO:0008465 GO:0009854
Sb04g000320.3	GO:0008266 GO:0051287 GO:0005777 GO:0008465 GO:0009854
Sb04g004250.1	GO:0042538 GO:0005783 GO:0020037 GO:0005634 GO:0006979 GO:0009269 GO:0004601 GO:0016757 GO:0009409 GO:0009505 GO:0009055
Sb01g005990.1	GO:0005737 GO:0004364 GO:0009407
Sb02g003090.1	GO:0005737 GO:0004364 GO:0016829 GO:0009407 GO:0042631 GO:0006979
Sb03g030100.1	GO:0043169 GO:0006032 GO:0044464 GO:0004553
Sb07g021630.1	GO:0005737 GO:0008886 GO:0006950 GO:0004028 GO:0008152
Sb05g027870.1	GO:0009535 GO:0010287 GO:0016984 GO:0009416 GO:0043531 GO:0009409 GO:0046863 GO:0005524
Sb06g031240.1	GO:0042624 GO:0015992 GO:0005515 GO:0016021 GO:0000287 GO:0010119 GO:0009414 GO:0005886 GO:0009737 GO:0008553 GO:0006754 GO:0005524
Sb05g014470.1	GO:0004013 GO:0006950 GO:0006346 GO:0009793 GO:0005488 GO:0016441 GO:0006730
Sb05g001000.1	GO:0020037 GO:0042744 GO:0012505 GO:0009055 GO:0004601 GO:0005509
Sb08g005190.1	GO:0004437 GO:0009968 GO:0008441 GO:0048015 GO:0009738 GO:0043157 GO:0006790 GO:0009409 GO:0006401 GO:0016481 GO:0009507
Sb06g018220.2	GO:0009688 GO:0016123 GO:0006725 GO:0010182 GO:0016020 GO:0009540 GO:0006970 GO:0009414 GO:0010114 GO:0009408 GO:0009055 GO:0055114 GO:0009507
Sb06g018220.1	GO:0009688 GO:0016123 GO:0006725 GO:0010182 GO:0016020 GO:0009540 GO:0006970 GO:0009414 GO:0010114 GO:0009408 GO:0009055 GO:0055114 GO:0009507
Sb06g001960.1	GO:0010204 GO:0050661 GO:0050660 GO:0005792 GO:0004499 GO:0009627 GO:0009626 GO:0050832 GO:0009870 GO:0042742 GO:0031227 GO:0009055
Sb08g000550.1	GO:0006879 GO:0042542 GO:0004322 GO:0009617 GO:0008199 GO:0006826 GO:0010039 GO:0009409 GO:0009737 GO:0009507
Sb0010s007790.1	GO:0047066 GO:0042542 GO:0005829 GO:0009738 GO:0005739 GO:0042631 GO:0009507 GO:0004602 GO:0009055
Sb01g031520.1	GO:0042554 GO:0050660 GO:0007595 GO:0005829 GO:0051537 GO:0048072 GO:0006950 GO:0030856 GO:0004854 GO:0004855 GO:0008340 GO:0005506 GO:0009055 GO:0006145 GO:0045453 GO:0055114 GO:0010044
Sb01g031520.2	GO:0042554 GO:0050660 GO:0007595 GO:0005829 GO:0051537 GO:0048072 GO:0006950 GO:0030856 GO:0004854 GO:0004855 GO:0008340 GO:0005506 GO:0009055 GO:0006145 GO:0045453 GO:0055114 GO:0010044
Sb01g045920.2	GO:0009535 GO:0009228 GO:0009793 GO:0006098 GO:0004789 GO:0009409 GO:0004750 GO:0019253
Sb01g031870.1	GO:0009535 GO:0046423 GO:0009409 GO:0009695 GO:0005886 GO:0009269
Sb04g024570.1	GO:0005737 GO:0032389 GO:0000404 GO:0000710 GO:0016887 GO:0005524 GO:0032139 GO:0032138 GO:0043570 GO:0032407 GO:0003697 GO:0016447 GO:0016446
Sb04g002790.1	GO:0005737 GO:0015937 GO:0005634 GO:0004595 GO:0005524 GO:0004140
Sb10g005500.1	GO:0042624 GO:0015992 GO:0005515 GO:0016021 GO:0000287 GO:0010119 GO:0009414 GO:0005886 GO:0009737 GO:0008553 GO:0006754 GO:0005524
Sb08g004840.1	GO:0004028 GO:0006629 GO:0004030 GO:0009737 GO:0005783 GO:0016021 GO:0006066 GO:0005743 GO:0009536 GO:0006081 GO:0009269 GO:0009651 GO:0005829 GO:0004029
Sb03g034000.1	GO:0008285 GO:0018342 GO:0009414 GO:0005965 GO:0004660 GO:0048146 GO:0042060 GO:0004311 GO:0009934 GO:0005515 GO:0009792 GO:0009788 GO:0046872
Sb09g002320.1	GO:0004435 GO:0007242 GO:0005509 GO:0006629
Sb03g004540.1	GO:0047274 GO:0019593 GO:0005986 GO:0010325 GO:0047268 GO:0004553
Sb05g005470.1	GO:0004028 GO:0008106 GO:0016021 GO:0004030 GO:0009737 GO:0004029 GO:0005634 GO:0046292 GO:0000302 GO:0005743 GO:0009536 GO:0042406 GO:0009269 GO:0009651 GO:0005829
Sb01g047540.1	GO:0005737 GO:0016124 GO:0045549 GO:0009414 GO:0016121
Sb03g034680.1	GO:0005794 GO:0009833 GO:0042538 GO:0005515 GO:0009863 GO:0016021 GO:0005886 GO:0009867 GO:0030244 GO:0050832 GO:0010400 GO:0016760 GO:0008270 GO:0009414 GO:0009873 GO:0009834 GO:0010116 GO:0042742
Sb02g028770.1	GO:0009825 GO:0009809 GO:0009735 GO:0016998 GO:0010053 GO:0044464 GO:0009408 GO:0010337 GO:0009414 GO:0009651 GO:0004568 GO:0006032
Sb01g008730.1	GO:0005737 GO:0055114 GO:0004022 GO:0008270
Sb01g008730.2	GO:0005737 GO:0055114 GO:0004022 GO:0008270
Sb01g008730.3	GO:0005737 GO:0055114 GO:0004022 GO:0008270
Sb02g038130.1	GO:0005737 GO:0004364 GO:0009407
Sb05g009350.1	GO:0005737 GO:0055114 GO:0004022 GO:0008270
Sb01g037090.1	GO:0047216 GO:0009408 GO:0009644 GO:0016051 GO:0042542
