# Supplementary material for: Pathways and Network Based Analysis of Candidate Genes to Reveal Cross-Talk and Specificity in the Sorghum (Sorghum bicolor (L.) Moench) Responses to Drought and It's Co-occurring Stresses
Source: Front Genet. 2018 Nov 20;9:557. doi: 10.3389/fgene.2018.00557 (PMC6255970; doi:10.3389/fgene.2018.00557)
Supplement: Table S5 — Detailed description of sorghum PPI data used as an input for pathway network analysis. [file Table_5.XLSX]

## Sheet: Total sorghum PPI with 3749 uni
Table S5: Detailed description of sorghum PPI data used as an input for pathway netgwork analysis
phytozome	Sb0012s002210	Sb0012s002210	neighbouring_reaction_109641<->Reaction<->110650
phytozome	Sb0012s002210	Sb0012s002210	neighbouring_reaction_110650<->Reaction<->109641
phytozome	Sb0012s002210	Sb0012s002210	neighbouring_reaction_110650<->Reaction<->110651
phytozome	Sb0012s002210	Sb0012s002210	neighbouring_reaction_110650<->Reaction<->113703
phytozome	Sb0012s002210	Sb0012s002210	neighbouring_reaction_110651<->Reaction<->110650
phytozome	Sb0012s002210	Sb0012s002210	neighbouring_reaction_110651<->Reaction<->110653
phytozome	Sb0012s002210	Sb0012s002210	neighbouring_reaction_110652<->Reaction<->110653
phytozome	Sb0012s002210	Sb0012s002210	neighbouring_reaction_110653<->Reaction<->110651
phytozome	Sb0012s002210	Sb0012s002210	neighbouring_reaction_110653<->Reaction<->110652
phytozome	Sb0012s002210	Sb0012s002210	neighbouring_reaction_113703<->Reaction<->110650
phytozome	Sb0012s002210	Sb01g010280	neighbouring_reaction_106147<->Reaction<->110535
phytozome	Sb0012s002210	Sb01g010280	neighbouring_reaction_110535<->Reaction<->106147
phytozome	Sb0012s002210	Sb03g028080	neighbouring_reaction_106147<->Reaction<->110535
phytozome	Sb0012s002210	Sb03g028080	neighbouring_reaction_110535<->Reaction<->106147
phytozome	Sb01g000580	Sb01g000580	neighbouring_reaction_111820<->Reaction<->111822
phytozome	Sb01g000580	Sb01g000580	neighbouring_reaction_111822<->Reaction<->111820
phytozome	Sb01g000580	Sb01g000580	neighbouring_reaction_111822<->Reaction<->111825
phytozome	Sb01g000580	Sb01g000580	neighbouring_reaction_111823<->Reaction<->111828
phytozome	Sb01g000580	Sb01g000580	neighbouring_reaction_111825<->Reaction<->111822
phytozome	Sb01g000580	Sb01g000580	neighbouring_reaction_111828<->Reaction<->111823
phytozome	Sb01g000580	Sb01g000580	neighbouring_reaction_111828<->Reaction<->111830
phytozome	Sb01g000580	Sb01g000580	neighbouring_reaction_111830<->Reaction<->111828
phytozome	Sb01g001140	Sb01g007370	neighbouring_reaction_109150<->Reaction<->113126
phytozome	Sb01g001140	Sb01g007370	neighbouring_reaction_113126<->Reaction<->109150
phytozome	Sb01g002140	Sb08g003330	neighbouring_reaction_109214<->Reaction<->113602
phytozome	Sb01g002140	Sb08g003330	neighbouring_reaction_113602<->Reaction<->109214
phytozome	Sb01g002480	Sb02g004010	neighbouring_reaction_108987<->Reaction<->115776
phytozome	Sb01g002480	Sb02g004010	neighbouring_reaction_115776<->Reaction<->108987
phytozome	Sb01g004040	Sb01g004040	neighbouring_reaction_109846<->Reaction<->109889
phytozome	Sb01g004040	Sb01g004040	neighbouring_reaction_109846<->Reaction<->111131
phytozome	Sb01g004040	Sb01g004040	neighbouring_reaction_109847<->Reaction<->109887
phytozome	Sb01g004040	Sb01g004040	neighbouring_reaction_109847<->Reaction<->114032
phytozome	Sb01g004040	Sb01g004040	neighbouring_reaction_109887<->Reaction<->109847
phytozome	Sb01g004040	Sb01g004040	neighbouring_reaction_109887<->Reaction<->113594
phytozome	Sb01g004040	Sb01g004040	neighbouring_reaction_109887<->Reaction<->113595
phytozome	Sb01g004040	Sb01g004040	neighbouring_reaction_109889<->Reaction<->109846
phytozome	Sb01g004040	Sb01g004040	neighbouring_reaction_109889<->Reaction<->113594
phytozome	Sb01g004040	Sb01g004040	neighbouring_reaction_109889<->Reaction<->113595
phytozome	Sb01g004040	Sb01g004040	neighbouring_reaction_111131<->Reaction<->109846
phytozome	Sb01g004040	Sb01g004040	neighbouring_reaction_113594<->Reaction<->109887
phytozome	Sb01g004040	Sb01g004040	neighbouring_reaction_113594<->Reaction<->109889
phytozome	Sb01g004040	Sb01g004040	neighbouring_reaction_113595<->Reaction<->109887
phytozome	Sb01g004040	Sb01g004040	neighbouring_reaction_113595<->Reaction<->109889
phytozome	Sb01g004040	Sb01g004040	neighbouring_reaction_114032<->Reaction<->109847
phytozome	Sb01g004040	Sb01g004040	neighbouring_reaction_114032<->Reaction<->114246
phytozome	Sb01g004040	Sb01g004040	neighbouring_reaction_114243<->Reaction<->114245
phytozome	Sb01g004040	Sb01g004040	neighbouring_reaction_114244<->Reaction<->114245
phytozome	Sb01g004040	Sb01g004040	neighbouring_reaction_114245<->Reaction<->114243
phytozome	Sb01g004040	Sb01g004040	neighbouring_reaction_114245<->Reaction<->114244
phytozome	Sb01g004040	Sb01g004040	neighbouring_reaction_114246<->Reaction<->114032
phytozome	Sb01g004040	Sb01g007460	indirect_complex_109807
phytozome	Sb01g004040	Sb01g007460	neighbouring_reaction_109846<->Reaction<->109889
phytozome	Sb01g004040	Sb01g007460	neighbouring_reaction_109846<->Reaction<->111131
phytozome	Sb01g004040	Sb01g007460	neighbouring_reaction_109847<->Reaction<->109887
phytozome	Sb01g004040	Sb01g007460	neighbouring_reaction_109847<->Reaction<->114032
phytozome	Sb01g004040	Sb01g007460	neighbouring_reaction_109887<->Reaction<->109847
phytozome	Sb01g004040	Sb01g007460	neighbouring_reaction_109887<->Reaction<->113594
phytozome	Sb01g004040	Sb01g007460	neighbouring_reaction_109887<->Reaction<->113595
phytozome	Sb01g004040	Sb01g007460	neighbouring_reaction_109889<->Reaction<->109846
phytozome	Sb01g004040	Sb01g007460	neighbouring_reaction_109889<->Reaction<->113594
phytozome	Sb01g004040	Sb01g007460	neighbouring_reaction_109889<->Reaction<->113595
phytozome	Sb01g004040	Sb01g007460	neighbouring_reaction_111131<->Reaction<->109846
phytozome	Sb01g004040	Sb01g007460	neighbouring_reaction_113594<->Reaction<->109887
phytozome	Sb01g004040	Sb01g007460	neighbouring_reaction_113594<->Reaction<->109889
phytozome	Sb01g004040	Sb01g007460	neighbouring_reaction_113595<->Reaction<->109887
phytozome	Sb01g004040	Sb01g007460	neighbouring_reaction_113595<->Reaction<->109889
phytozome	Sb01g004040	Sb01g007460	neighbouring_reaction_114032<->Reaction<->109847
phytozome	Sb01g004040	Sb01g007460	neighbouring_reaction_114032<->Reaction<->114246
phytozome	Sb01g004040	Sb01g007460	neighbouring_reaction_114243<->Reaction<->114245
phytozome	Sb01g004040	Sb01g007460	neighbouring_reaction_114244<->Reaction<->114245
phytozome	Sb01g004040	Sb01g007460	neighbouring_reaction_114245<->Reaction<->114243
phytozome	Sb01g004040	Sb01g007460	neighbouring_reaction_114245<->Reaction<->114244
phytozome	Sb01g004040	Sb01g007460	neighbouring_reaction_114246<->Reaction<->114032
phytozome	Sb01g004040	Sb01g007460	reaction_114245
phytozome	Sb01g004040	Sb01g032360	indirect_complex_109813
phytozome	Sb01g004040	Sb01g032360	neighbouring_reaction_109846<->Reaction<->109889
phytozome	Sb01g004040	Sb01g032360	neighbouring_reaction_109846<->Reaction<->111131
phytozome	Sb01g004040	Sb01g032360	neighbouring_reaction_109847<->Reaction<->109887
phytozome	Sb01g004040	Sb01g032360	neighbouring_reaction_109847<->Reaction<->114032
phytozome	Sb01g004040	Sb01g032360	neighbouring_reaction_109887<->Reaction<->109847
phytozome	Sb01g004040	Sb01g032360	neighbouring_reaction_109887<->Reaction<->113594
phytozome	Sb01g004040	Sb01g032360	neighbouring_reaction_109887<->Reaction<->113595
phytozome	Sb01g004040	Sb01g032360	neighbouring_reaction_109889<->Reaction<->109846
phytozome	Sb01g004040	Sb01g032360	neighbouring_reaction_109889<->Reaction<->113594
phytozome	Sb01g004040	Sb01g032360	neighbouring_reaction_109889<->Reaction<->113595
phytozome	Sb01g004040	Sb01g032360	neighbouring_reaction_111131<->Reaction<->109846
phytozome	Sb01g004040	Sb01g032360	neighbouring_reaction_113594<->Reaction<->109887
phytozome	Sb01g004040	Sb01g032360	neighbouring_reaction_113594<->Reaction<->109889
phytozome	Sb01g004040	Sb01g032360	neighbouring_reaction_113595<->Reaction<->109887
phytozome	Sb01g004040	Sb01g032360	neighbouring_reaction_113595<->Reaction<->109889
phytozome	Sb01g004040	Sb01g032360	neighbouring_reaction_114032<->Reaction<->109847
phytozome	Sb01g004040	Sb01g032360	neighbouring_reaction_114032<->Reaction<->114246
phytozome	Sb01g004040	Sb01g032360	neighbouring_reaction_114246<->Reaction<->114032
phytozome	Sb01g004040	Sb01g032360	reaction_114032
phytozome	Sb01g004040	Sb02g043990	neighbouring_reaction_109846<->Reaction<->111835
phytozome	Sb01g004040	Sb02g043990	neighbouring_reaction_111835<->Reaction<->109846
phytozome	Sb01g004040	Sb03g002410	neighbouring_reaction_109846<->Reaction<->111835
phytozome	Sb01g004040	Sb03g002410	neighbouring_reaction_111835<->Reaction<->109846
phytozome	Sb01g004040	Sb03g024490	indirect_complex_109839
phytozome	Sb01g004040	Sb03g024490	indirect_complex_109888
phytozome	Sb01g004040	Sb03g024490	neighbouring_reaction_109846<->Reaction<->109889
phytozome	Sb01g004040	Sb03g024490	neighbouring_reaction_109846<->Reaction<->111131
phytozome	Sb01g004040	Sb03g024490	neighbouring_reaction_109846<->Reaction<->111835
phytozome	Sb01g004040	Sb03g024490	neighbouring_reaction_109887<->Reaction<->113594
phytozome	Sb01g004040	Sb03g024490	neighbouring_reaction_109887<->Reaction<->113595
phytozome	Sb01g004040	Sb03g024490	neighbouring_reaction_109889<->Reaction<->109846
phytozome	Sb01g004040	Sb03g024490	neighbouring_reaction_109889<->Reaction<->113594
phytozome	Sb01g004040	Sb03g024490	neighbouring_reaction_109889<->Reaction<->113595
phytozome	Sb01g004040	Sb03g024490	neighbouring_reaction_111131<->Reaction<->109846
phytozome	Sb01g004040	Sb03g024490	neighbouring_reaction_111835<->Reaction<->109846
phytozome	Sb01g004040	Sb03g024490	neighbouring_reaction_113594<->Reaction<->109887
phytozome	Sb01g004040	Sb03g024490	neighbouring_reaction_113594<->Reaction<->109889
phytozome	Sb01g004040	Sb03g024490	neighbouring_reaction_113595<->Reaction<->109887
phytozome	Sb01g004040	Sb03g024490	neighbouring_reaction_113595<->Reaction<->109889
phytozome	Sb01g004040	Sb03g024490	reaction_113594
phytozome	Sb01g004040	Sb04g036050	indirect_complex_109839
phytozome	Sb01g004040	Sb04g036050	indirect_complex_109888
phytozome	Sb01g004040	Sb04g036050	neighbouring_reaction_109846<->Reaction<->109889
phytozome	Sb01g004040	Sb04g036050	neighbouring_reaction_109846<->Reaction<->111131
phytozome	Sb01g004040	Sb04g036050	neighbouring_reaction_109846<->Reaction<->111835
phytozome	Sb01g004040	Sb04g036050	neighbouring_reaction_109887<->Reaction<->113594
phytozome	Sb01g004040	Sb04g036050	neighbouring_reaction_109887<->Reaction<->113595
phytozome	Sb01g004040	Sb04g036050	neighbouring_reaction_109889<->Reaction<->109846
phytozome	Sb01g004040	Sb04g036050	neighbouring_reaction_109889<->Reaction<->113594
phytozome	Sb01g004040	Sb04g036050	neighbouring_reaction_109889<->Reaction<->113595
phytozome	Sb01g004040	Sb04g036050	neighbouring_reaction_111131<->Reaction<->109846
phytozome	Sb01g004040	Sb04g036050	neighbouring_reaction_111835<->Reaction<->109846
phytozome	Sb01g004040	Sb04g036050	neighbouring_reaction_113594<->Reaction<->109887
phytozome	Sb01g004040	Sb04g036050	neighbouring_reaction_113594<->Reaction<->109889
phytozome	Sb01g004040	Sb04g036050	neighbouring_reaction_113595<->Reaction<->109887
phytozome	Sb01g004040	Sb04g036050	neighbouring_reaction_113595<->Reaction<->109889
phytozome	Sb01g004040	Sb04g036050	reaction_113594
phytozome	Sb01g004040	Sb06g017330	indirect_complex_109839
phytozome	Sb01g004040	Sb06g017330	indirect_complex_109888
phytozome	Sb01g004040	Sb06g017330	neighbouring_reaction_109846<->Reaction<->109889
phytozome	Sb01g004040	Sb06g017330	neighbouring_reaction_109846<->Reaction<->111131
phytozome	Sb01g004040	Sb06g017330	neighbouring_reaction_109846<->Reaction<->111835
phytozome	Sb01g004040	Sb06g017330	neighbouring_reaction_109887<->Reaction<->113594
phytozome	Sb01g004040	Sb06g017330	neighbouring_reaction_109887<->Reaction<->113595
phytozome	Sb01g004040	Sb06g017330	neighbouring_reaction_109889<->Reaction<->109846
phytozome	Sb01g004040	Sb06g017330	neighbouring_reaction_109889<->Reaction<->113594
phytozome	Sb01g004040	Sb06g017330	neighbouring_reaction_109889<->Reaction<->113595
phytozome	Sb01g004040	Sb06g017330	neighbouring_reaction_111131<->Reaction<->109846
phytozome	Sb01g004040	Sb06g017330	neighbouring_reaction_111835<->Reaction<->109846
phytozome	Sb01g004040	Sb06g017330	neighbouring_reaction_113594<->Reaction<->109887
phytozome	Sb01g004040	Sb06g017330	neighbouring_reaction_113594<->Reaction<->109889
phytozome	Sb01g004040	Sb06g017330	neighbouring_reaction_113595<->Reaction<->109887
phytozome	Sb01g004040	Sb06g017330	neighbouring_reaction_113595<->Reaction<->109889
phytozome	Sb01g004040	Sb06g017330	reaction_113594
phytozome	Sb01g004040	Sb06g033210	neighbouring_reaction_109846<->Reaction<->111835
phytozome	Sb01g004040	Sb06g033210	neighbouring_reaction_111835<->Reaction<->109846
phytozome	Sb01g004040	Sb06g033210	neighbouring_reaction_109846<->Reaction<->111835
phytozome	Sb01g004040	Sb06g033210	neighbouring_reaction_111835<->Reaction<->109846
phytozome	Sb01g004040	Sb07g022680	neighbouring_reaction_111129<->Reaction<->111131
phytozome	Sb01g004040	Sb07g022680	neighbouring_reaction_111131<->Reaction<->111129
phytozome	Sb01g004040	Sb08g018160	indirect_complex_109839
phytozome	Sb01g004040	Sb08g018160	indirect_complex_109888
phytozome	Sb01g004040	Sb08g018160	neighbouring_reaction_109846<->Reaction<->109889
phytozome	Sb01g004040	Sb08g018160	neighbouring_reaction_109846<->Reaction<->111131
phytozome	Sb01g004040	Sb08g018160	neighbouring_reaction_109846<->Reaction<->111835
phytozome	Sb01g004040	Sb08g018160	neighbouring_reaction_109887<->Reaction<->113594
phytozome	Sb01g004040	Sb08g018160	neighbouring_reaction_109887<->Reaction<->113595
phytozome	Sb01g004040	Sb08g018160	neighbouring_reaction_109889<->Reaction<->109846
phytozome	Sb01g004040	Sb08g018160	neighbouring_reaction_109889<->Reaction<->113594
phytozome	Sb01g004040	Sb08g018160	neighbouring_reaction_109889<->Reaction<->113595
phytozome	Sb01g004040	Sb08g018160	neighbouring_reaction_111131<->Reaction<->109846
phytozome	Sb01g004040	Sb08g018160	neighbouring_reaction_111835<->Reaction<->109846
phytozome	Sb01g004040	Sb08g018160	neighbouring_reaction_113594<->Reaction<->109887
phytozome	Sb01g004040	Sb08g018160	neighbouring_reaction_113594<->Reaction<->109889
phytozome	Sb01g004040	Sb08g018160	neighbouring_reaction_113595<->Reaction<->109887
phytozome	Sb01g004040	Sb08g018160	neighbouring_reaction_113595<->Reaction<->109889
phytozome	Sb01g004040	Sb08g018160	reaction_113594
phytozome	Sb01g004040	Sb08g021650	indirect_complex_109804
phytozome	Sb01g004040	Sb08g021650	neighbouring_reaction_109846<->Reaction<->109889
phytozome	Sb01g004040	Sb08g021650	neighbouring_reaction_109846<->Reaction<->111131
phytozome	Sb01g004040	Sb08g021650	neighbouring_reaction_109847<->Reaction<->109887
phytozome	Sb01g004040	Sb08g021650	neighbouring_reaction_109847<->Reaction<->114032
phytozome	Sb01g004040	Sb08g021650	neighbouring_reaction_109887<->Reaction<->109847
phytozome	Sb01g004040	Sb08g021650	neighbouring_reaction_109887<->Reaction<->113594
phytozome	Sb01g004040	Sb08g021650	neighbouring_reaction_109887<->Reaction<->113595
phytozome	Sb01g004040	Sb08g021650	neighbouring_reaction_109889<->Reaction<->109846
phytozome	Sb01g004040	Sb08g021650	neighbouring_reaction_109889<->Reaction<->113594
phytozome	Sb01g004040	Sb08g021650	neighbouring_reaction_109889<->Reaction<->113595
phytozome	Sb01g004040	Sb08g021650	neighbouring_reaction_111131<->Reaction<->109846
phytozome	Sb01g004040	Sb08g021650	neighbouring_reaction_113594<->Reaction<->109887
phytozome	Sb01g004040	Sb08g021650	neighbouring_reaction_113594<->Reaction<->109889
phytozome	Sb01g004040	Sb08g021650	neighbouring_reaction_113595<->Reaction<->109887
phytozome	Sb01g004040	Sb08g021650	neighbouring_reaction_113595<->Reaction<->109889
phytozome	Sb01g004040	Sb08g021650	neighbouring_reaction_114032<->Reaction<->109847
phytozome	Sb01g004040	Sb08g021650	neighbouring_reaction_114032<->Reaction<->114246
phytozome	Sb01g004040	Sb08g021650	neighbouring_reaction_114243<->Reaction<->114245
phytozome	Sb01g004040	Sb08g021650	neighbouring_reaction_114244<->Reaction<->114245
phytozome	Sb01g004040	Sb08g021650	neighbouring_reaction_114245<->Reaction<->114243
phytozome	Sb01g004040	Sb08g021650	neighbouring_reaction_114245<->Reaction<->114244
phytozome	Sb01g004040	Sb08g021650	neighbouring_reaction_114246<->Reaction<->114032
phytozome	Sb01g004040	Sb08g021650	reaction_114243
phytozome	Sb01g004040	Sb09g003270	neighbouring_reaction_109846<->Reaction<->111835
phytozome	Sb01g004040	Sb09g003270	neighbouring_reaction_111835<->Reaction<->109846
phytozome	Sb01g004040	Sb09g008010	indirect_complex_109839
phytozome	Sb01g004040	Sb09g008010	indirect_complex_109888
phytozome	Sb01g004040	Sb09g008010	neighbouring_reaction_109846<->Reaction<->109889
phytozome	Sb01g004040	Sb09g008010	neighbouring_reaction_109846<->Reaction<->111131
phytozome	Sb01g004040	Sb09g008010	neighbouring_reaction_109846<->Reaction<->111835
phytozome	Sb01g004040	Sb09g008010	neighbouring_reaction_109887<->Reaction<->113594
phytozome	Sb01g004040	Sb09g008010	neighbouring_reaction_109887<->Reaction<->113595
phytozome	Sb01g004040	Sb09g008010	neighbouring_reaction_109889<->Reaction<->109846
phytozome	Sb01g004040	Sb09g008010	neighbouring_reaction_109889<->Reaction<->113594
phytozome	Sb01g004040	Sb09g008010	neighbouring_reaction_109889<->Reaction<->113595
phytozome	Sb01g004040	Sb09g008010	neighbouring_reaction_111131<->Reaction<->109846
phytozome	Sb01g004040	Sb09g008010	neighbouring_reaction_111835<->Reaction<->109846
phytozome	Sb01g004040	Sb09g008010	neighbouring_reaction_113594<->Reaction<->109887
phytozome	Sb01g004040	Sb09g008010	neighbouring_reaction_113594<->Reaction<->109889
phytozome	Sb01g004040	Sb09g008010	neighbouring_reaction_113595<->Reaction<->109887
phytozome	Sb01g004040	Sb09g008010	neighbouring_reaction_113595<->Reaction<->109889
phytozome	Sb01g004040	Sb09g008010	reaction_113594
phytozome	Sb01g004040	Sb09g022830	indirect_complex_109844
phytozome	Sb01g004040	Sb09g022830	neighbouring_reaction_109846<->Reaction<->109889
phytozome	Sb01g004040	Sb09g022830	neighbouring_reaction_109846<->Reaction<->111131
phytozome	Sb01g004040	Sb09g022830	neighbouring_reaction_109846<->Reaction<->111835
phytozome	Sb01g004040	Sb09g022830	neighbouring_reaction_109887<->Reaction<->113595
phytozome	Sb01g004040	Sb09g022830	neighbouring_reaction_109889<->Reaction<->109846
phytozome	Sb01g004040	Sb09g022830	neighbouring_reaction_109889<->Reaction<->113594
phytozome	Sb01g004040	Sb09g022830	neighbouring_reaction_109889<->Reaction<->113595
phytozome	Sb01g004040	Sb09g022830	neighbouring_reaction_111131<->Reaction<->109846
phytozome	Sb01g004040	Sb09g022830	neighbouring_reaction_111835<->Reaction<->109846
phytozome	Sb01g004040	Sb09g022830	neighbouring_reaction_113594<->Reaction<->109889
phytozome	Sb01g004040	Sb09g022830	neighbouring_reaction_113595<->Reaction<->109887
phytozome	Sb01g004040	Sb09g022830	neighbouring_reaction_113595<->Reaction<->109889
phytozome	Sb01g004040	Sb09g022830	reaction_113595
phytozome	Sb01g004040	Sb09g023360	indirect_complex_109839
phytozome	Sb01g004040	Sb09g023360	indirect_complex_109888
phytozome	Sb01g004040	Sb09g023360	neighbouring_reaction_109846<->Reaction<->109889
phytozome	Sb01g004040	Sb09g023360	neighbouring_reaction_109846<->Reaction<->111131
phytozome	Sb01g004040	Sb09g023360	neighbouring_reaction_109846<->Reaction<->111835
phytozome	Sb01g004040	Sb09g023360	neighbouring_reaction_109887<->Reaction<->113594
phytozome	Sb01g004040	Sb09g023360	neighbouring_reaction_109887<->Reaction<->113595
phytozome	Sb01g004040	Sb09g023360	neighbouring_reaction_109889<->Reaction<->109846
phytozome	Sb01g004040	Sb09g023360	neighbouring_reaction_109889<->Reaction<->113594
phytozome	Sb01g004040	Sb09g023360	neighbouring_reaction_109889<->Reaction<->113595
phytozome	Sb01g004040	Sb09g023360	neighbouring_reaction_111131<->Reaction<->109846
phytozome	Sb01g004040	Sb09g023360	neighbouring_reaction_111835<->Reaction<->109846
phytozome	Sb01g004040	Sb09g023360	neighbouring_reaction_113594<->Reaction<->109887
phytozome	Sb01g004040	Sb09g023360	neighbouring_reaction_113594<->Reaction<->109889
phytozome	Sb01g004040	Sb09g023360	neighbouring_reaction_113595<->Reaction<->109887
phytozome	Sb01g004040	Sb09g023360	neighbouring_reaction_113595<->Reaction<->109889
phytozome	Sb01g004040	Sb09g023360	reaction_113594
phytozome	Sb01g004040	Sb10g007540	indirect_complex_109844
phytozome	Sb01g004040	Sb10g007540	neighbouring_reaction_109846<->Reaction<->109889
phytozome	Sb01g004040	Sb10g007540	neighbouring_reaction_109846<->Reaction<->111131
phytozome	Sb01g004040	Sb10g007540	neighbouring_reaction_109887<->Reaction<->113595
phytozome	Sb01g004040	Sb10g007540	neighbouring_reaction_109889<->Reaction<->109846
phytozome	Sb01g004040	Sb10g007540	neighbouring_reaction_109889<->Reaction<->113594
phytozome	Sb01g004040	Sb10g007540	neighbouring_reaction_109889<->Reaction<->113595
phytozome	Sb01g004040	Sb10g007540	neighbouring_reaction_111131<->Reaction<->109846
phytozome	Sb01g004040	Sb10g007540	neighbouring_reaction_113594<->Reaction<->109889
phytozome	Sb01g004040	Sb10g007540	neighbouring_reaction_113595<->Reaction<->109887
phytozome	Sb01g004040	Sb10g007540	neighbouring_reaction_113595<->Reaction<->109889
phytozome	Sb01g004040	Sb10g007540	reaction_113595
phytozome	Sb01g004810	Sb01g039980	neighbouring_reaction_109558<->Reaction<->114623
phytozome	Sb01g004810	Sb01g039980	neighbouring_reaction_114623<->Reaction<->109558
phytozome	Sb01g004810	Sb01g039980	neighbouring_reaction_109558<->Reaction<->114623
phytozome	Sb01g004810	Sb01g039980	neighbouring_reaction_114623<->Reaction<->109558
phytozome	Sb01g004810	Sb03g007380	neighbouring_reaction_110619<->Reaction<->114623
phytozome	Sb01g004810	Sb03g007380	neighbouring_reaction_114623<->Reaction<->110619
phytozome	Sb01g004810	Sb03g007380	neighbouring_reaction_110619<->Reaction<->114623
phytozome	Sb01g004810	Sb03g007380	neighbouring_reaction_114623<->Reaction<->110619
phytozome	Sb01g005084	Sb03g011930	neighbouring_reaction_114270<->Reaction<->114793
phytozome	Sb01g005084	Sb03g011930	neighbouring_reaction_114793<->Reaction<->114270
phytozome	Sb01g005084	Sb03g013170	neighbouring_reaction_114270<->Reaction<->114793
phytozome	Sb01g005084	Sb03g013170	neighbouring_reaction_114793<->Reaction<->114270
phytozome	Sb01g005084	Sb03g013170	neighbouring_reaction_114270<->Reaction<->114793
phytozome	Sb01g005084	Sb03g013170	neighbouring_reaction_114793<->Reaction<->114270
phytozome	Sb01g005084	Sb05g014470	neighbouring_reaction_114743<->Reaction<->114793
phytozome	Sb01g005084	Sb05g014470	neighbouring_reaction_114793<->Reaction<->114743
phytozome	Sb01g005084	Sb05g014470	neighbouring_reaction_114743<->Reaction<->114793
phytozome	Sb01g005084	Sb05g014470	neighbouring_reaction_114793<->Reaction<->114743
phytozome	Sb01g005084	Sb09g002840	neighbouring_reaction_114270<->Reaction<->114793
phytozome	Sb01g005084	Sb09g002840	neighbouring_reaction_114793<->Reaction<->114270
phytozome	Sb01g005600	Sb01g005600	neighbouring_reaction_113439<->Reaction<->114724
phytozome	Sb01g005600	Sb01g005600	neighbouring_reaction_113439<->Reaction<->114725
phytozome	Sb01g005600	Sb01g005600	neighbouring_reaction_114724<->Reaction<->113439
phytozome	Sb01g005600	Sb01g005600	neighbouring_reaction_114725<->Reaction<->113439
phytozome	Sb01g005600	Sb01g045530	direct_complex_113436
phytozome	Sb01g005600	Sb01g045530	neighbouring_reaction_113439<->Reaction<->114724
phytozome	Sb01g005600	Sb01g045530	neighbouring_reaction_113439<->Reaction<->114725
phytozome	Sb01g005600	Sb01g045530	neighbouring_reaction_114724<->Reaction<->113439
phytozome	Sb01g005600	Sb01g045530	neighbouring_reaction_114725<->Reaction<->113439
phytozome	Sb01g005600	Sb04g034710	direct_complex_113436
phytozome	Sb01g005600	Sb04g034710	neighbouring_reaction_113439<->Reaction<->114724
phytozome	Sb01g005600	Sb04g034710	neighbouring_reaction_113439<->Reaction<->114725
phytozome	Sb01g005600	Sb04g034710	neighbouring_reaction_114724<->Reaction<->113439
phytozome	Sb01g005600	Sb04g034710	neighbouring_reaction_114725<->Reaction<->113439
phytozome	Sb01g005600	Sb08g004780	direct_complex_113436
phytozome	Sb01g005600	Sb08g004780	neighbouring_reaction_113439<->Reaction<->114724
phytozome	Sb01g005600	Sb08g004780	neighbouring_reaction_113439<->Reaction<->114725
phytozome	Sb01g005600	Sb08g004780	neighbouring_reaction_114724<->Reaction<->113439
phytozome	Sb01g005600	Sb08g004780	neighbouring_reaction_114725<->Reaction<->113439
phytozome	Sb01g005600	Sb01g005600	neighbouring_reaction_113439<->Reaction<->114724
phytozome	Sb01g005600	Sb01g005600	neighbouring_reaction_113439<->Reaction<->114725
phytozome	Sb01g005600	Sb01g005600	neighbouring_reaction_114724<->Reaction<->113439
phytozome	Sb01g005600	Sb01g005600	neighbouring_reaction_114725<->Reaction<->113439
phytozome	Sb01g005600	Sb01g005600	neighbouring_reaction_113439<->Reaction<->114724
phytozome	Sb01g005600	Sb01g005600	neighbouring_reaction_113439<->Reaction<->114725
phytozome	Sb01g005600	Sb01g005600	neighbouring_reaction_114724<->Reaction<->113439
phytozome	Sb01g005600	Sb01g005600	neighbouring_reaction_114725<->Reaction<->113439
phytozome	Sb01g005600	Sb01g045530	direct_complex_113436
phytozome	Sb01g005600	Sb01g045530	neighbouring_reaction_113439<->Reaction<->114724
phytozome	Sb01g005600	Sb01g045530	neighbouring_reaction_113439<->Reaction<->114725
phytozome	Sb01g005600	Sb01g045530	neighbouring_reaction_114724<->Reaction<->113439
phytozome	Sb01g005600	Sb01g045530	neighbouring_reaction_114725<->Reaction<->113439
phytozome	Sb01g005600	Sb04g034710	direct_complex_113436
phytozome	Sb01g005600	Sb04g034710	neighbouring_reaction_113439<->Reaction<->114724
phytozome	Sb01g005600	Sb04g034710	neighbouring_reaction_113439<->Reaction<->114725
phytozome	Sb01g005600	Sb04g034710	neighbouring_reaction_114724<->Reaction<->113439
phytozome	Sb01g005600	Sb04g034710	neighbouring_reaction_114725<->Reaction<->113439
phytozome	Sb01g005600	Sb08g004780	direct_complex_113436
phytozome	Sb01g005600	Sb08g004780	neighbouring_reaction_113439<->Reaction<->114724
phytozome	Sb01g005600	Sb08g004780	neighbouring_reaction_113439<->Reaction<->114725
phytozome	Sb01g005600	Sb08g004780	neighbouring_reaction_114724<->Reaction<->113439
phytozome	Sb01g005600	Sb08g004780	neighbouring_reaction_114725<->Reaction<->113439
phytozome	Sb01g006120	Sb01g006120	neighbouring_reaction_112587<->Reaction<->112588
phytozome	Sb01g006120	Sb01g006120	neighbouring_reaction_112588<->Reaction<->112587
phytozome	Sb01g006120	Sb01g006120	neighbouring_reaction_112587<->Reaction<->112588
phytozome	Sb01g006120	Sb01g006120	neighbouring_reaction_112588<->Reaction<->112587
phytozome	Sb01g006120	Sb01g006120	neighbouring_reaction_112587<->Reaction<->112588
phytozome	Sb01g006120	Sb01g006120	neighbouring_reaction_112588<->Reaction<->112587
phytozome	Sb01g006120	Sb01g006120	neighbouring_reaction_112587<->Reaction<->112588
phytozome	Sb01g006120	Sb01g006120	neighbouring_reaction_112588<->Reaction<->112587
phytozome	Sb01g006120	Sb01g006120	neighbouring_reaction_112587<->Reaction<->112588
phytozome	Sb01g006120	Sb01g006120	neighbouring_reaction_112588<->Reaction<->112587
phytozome	Sb01g006120	Sb01g006120	neighbouring_reaction_112587<->Reaction<->112588
phytozome	Sb01g006120	Sb01g006120	neighbouring_reaction_112588<->Reaction<->112587
phytozome	Sb01g006120	Sb01g006120	neighbouring_reaction_112587<->Reaction<->112588
phytozome	Sb01g006120	Sb01g006120	neighbouring_reaction_112588<->Reaction<->112587
phytozome	Sb01g006120	Sb01g006120	neighbouring_reaction_112587<->Reaction<->112588
phytozome	Sb01g006120	Sb01g006120	neighbouring_reaction_112588<->Reaction<->112587
phytozome	Sb01g006120	Sb01g006120	neighbouring_reaction_112587<->Reaction<->112588
phytozome	Sb01g006120	Sb01g006120	neighbouring_reaction_112588<->Reaction<->112587
phytozome	Sb01g006120	Sb01g006120	neighbouring_reaction_112587<->Reaction<->112588
phytozome	Sb01g006120	Sb01g006120	neighbouring_reaction_112588<->Reaction<->112587
phytozome	Sb01g006190	Sb01g006190	neighbouring_reaction_114523<->Reaction<->114549
phytozome	Sb01g006190	Sb01g006190	neighbouring_reaction_114549<->Reaction<->114523
phytozome	Sb01g006190	Sb01g010660	direct_complex_114552
phytozome	Sb01g006190	Sb01g010660	reaction_114553
phytozome	Sb01g006190	Sb01g013843	neighbouring_reaction_114523<->Reaction<->114549
phytozome	Sb01g006190	Sb01g013843	neighbouring_reaction_114549<->Reaction<->114523
phytozome	Sb01g006190	Sb01g029000	direct_complex_114546
phytozome	Sb01g006190	Sb01g029000	reaction_114547
phytozome	Sb01g006190	Sb02g002760	neighbouring_reaction_114523<->Reaction<->114549
phytozome	Sb01g006190	Sb02g002760	neighbouring_reaction_114549<->Reaction<->114523
phytozome	Sb01g006190	Sb04g026190	direct_complex_114554
phytozome	Sb01g006190	Sb04g026190	reaction_114555
phytozome	Sb01g006190	Sb06g024480	direct_complex_114546
phytozome	Sb01g006190	Sb06g024480	reaction_114547
phytozome	Sb01g006480	Sb01g039980	neighbouring_reaction_108588<->Reaction<->109558
phytozome	Sb01g006480	Sb01g039980	neighbouring_reaction_109558<->Reaction<->108588
phytozome	Sb01g006480	Sb01g039980	neighbouring_reaction_108588<->Reaction<->109558
phytozome	Sb01g006480	Sb01g039980	neighbouring_reaction_109558<->Reaction<->108588
phytozome	Sb01g006480	Sb06g004280	neighbouring_reaction_108588<->Reaction<->109584
phytozome	Sb01g006480	Sb06g004280	neighbouring_reaction_109584<->Reaction<->108588
phytozome	Sb01g006480	Sb09g005230	neighbouring_reaction_108588<->Reaction<->109584
phytozome	Sb01g006480	Sb09g005230	neighbouring_reaction_109584<->Reaction<->108588
phytozome	Sb01g006480	Sb10g002220	neighbouring_reaction_108588<->Reaction<->109584
phytozome	Sb01g006480	Sb10g002220	neighbouring_reaction_109584<->Reaction<->108588
phytozome	Sb01g006480	Sb10g002250	neighbouring_reaction_108588<->Reaction<->109584
phytozome	Sb01g006480	Sb10g002250	neighbouring_reaction_109584<->Reaction<->108588
phytozome	Sb01g006480	Sb01g039980	neighbouring_reaction_108588<->Reaction<->109558
phytozome	Sb01g006480	Sb01g039980	neighbouring_reaction_109558<->Reaction<->108588
phytozome	Sb01g006480	Sb01g039980	neighbouring_reaction_108588<->Reaction<->109558
phytozome	Sb01g006480	Sb01g039980	neighbouring_reaction_109558<->Reaction<->108588
phytozome	Sb01g006480	Sb06g004280	neighbouring_reaction_108588<->Reaction<->109584
phytozome	Sb01g006480	Sb06g004280	neighbouring_reaction_109584<->Reaction<->108588
phytozome	Sb01g006480	Sb09g005230	neighbouring_reaction_108588<->Reaction<->109584
phytozome	Sb01g006480	Sb09g005230	neighbouring_reaction_109584<->Reaction<->108588
phytozome	Sb01g006480	Sb10g002220	neighbouring_reaction_108588<->Reaction<->109584
phytozome	Sb01g006480	Sb10g002220	neighbouring_reaction_109584<->Reaction<->108588
phytozome	Sb01g006480	Sb10g002250	neighbouring_reaction_108588<->Reaction<->109584
phytozome	Sb01g006480	Sb10g002250	neighbouring_reaction_109584<->Reaction<->108588
phytozome	Sb01g006490	Sb02g037420	neighbouring_reaction_112032<->Reaction<->115439
phytozome	Sb01g006490	Sb02g037420	neighbouring_reaction_112887<->Reaction<->115439
phytozome	Sb01g006490	Sb02g037420	neighbouring_reaction_115439<->Reaction<->112032
phytozome	Sb01g006490	Sb02g037420	neighbouring_reaction_115439<->Reaction<->112887
phytozome	Sb01g007100	Sb01g007100	neighbouring_reaction_109476<->Reaction<->109477
phytozome	Sb01g007100	Sb01g007100	neighbouring_reaction_109477<->Reaction<->109476
phytozome	Sb01g007100	Sb01g007100	reaction_109477
phytozome	Sb01g007230	Sb01g007230	neighbouring_reaction_107455<->Reaction<->110267
phytozome	Sb01g007230	Sb01g007230	neighbouring_reaction_110267<->Reaction<->107455
phytozome	Sb01g007230	Sb01g007230	neighbouring_reaction_110267<->Reaction<->114954
phytozome	Sb01g007230	Sb01g007230	neighbouring_reaction_114954<->Reaction<->110267
phytozome	Sb01g007230	Sb02g001140	neighbouring_reaction_107455<->Reaction<->110267
phytozome	Sb01g007230	Sb02g001140	neighbouring_reaction_110267<->Reaction<->107455
phytozome	Sb01g007230	Sb02g001140	neighbouring_reaction_110267<->Reaction<->114954
phytozome	Sb01g007230	Sb02g001140	neighbouring_reaction_114954<->Reaction<->110267
phytozome	Sb01g007370	Sb06g026060	neighbouring_reaction_113126<->Reaction<->113133
phytozome	Sb01g007370	Sb06g026060	neighbouring_reaction_113133<->Reaction<->113126
phytozome	Sb01g007370	Sb10g026260	neighbouring_reaction_113126<->Reaction<->113133
phytozome	Sb01g007370	Sb10g026260	neighbouring_reaction_113133<->Reaction<->113126
phytozome	Sb01g007460	Sb01g007460	neighbouring_reaction_109846<->Reaction<->109889
phytozome	Sb01g007460	Sb01g007460	neighbouring_reaction_109846<->Reaction<->111131
phytozome	Sb01g007460	Sb01g007460	neighbouring_reaction_109847<->Reaction<->109887
phytozome	Sb01g007460	Sb01g007460	neighbouring_reaction_109847<->Reaction<->114032
phytozome	Sb01g007460	Sb01g007460	neighbouring_reaction_109887<->Reaction<->109847
phytozome	Sb01g007460	Sb01g007460	neighbouring_reaction_109887<->Reaction<->113594
phytozome	Sb01g007460	Sb01g007460	neighbouring_reaction_109887<->Reaction<->113595
phytozome	Sb01g007460	Sb01g007460	neighbouring_reaction_109889<->Reaction<->109846
phytozome	Sb01g007460	Sb01g007460	neighbouring_reaction_109889<->Reaction<->113594
phytozome	Sb01g007460	Sb01g007460	neighbouring_reaction_109889<->Reaction<->113595
phytozome	Sb01g007460	Sb01g007460	neighbouring_reaction_111131<->Reaction<->109846
phytozome	Sb01g007460	Sb01g007460	neighbouring_reaction_113594<->Reaction<->109887
phytozome	Sb01g007460	Sb01g007460	neighbouring_reaction_113594<->Reaction<->109889
phytozome	Sb01g007460	Sb01g007460	neighbouring_reaction_113595<->Reaction<->109887
phytozome	Sb01g007460	Sb01g007460	neighbouring_reaction_113595<->Reaction<->109889
phytozome	Sb01g007460	Sb01g007460	neighbouring_reaction_114032<->Reaction<->109847
phytozome	Sb01g007460	Sb01g007460	neighbouring_reaction_114032<->Reaction<->114246
phytozome	Sb01g007460	Sb01g007460	neighbouring_reaction_114244<->Reaction<->114245
phytozome	Sb01g007460	Sb01g007460	neighbouring_reaction_114245<->Reaction<->114244
phytozome	Sb01g007460	Sb01g007460	neighbouring_reaction_114246<->Reaction<->114032
phytozome	Sb01g007460	Sb01g032360	indirect_complex_109813
phytozome	Sb01g007460	Sb01g032360	neighbouring_reaction_109846<->Reaction<->109889
phytozome	Sb01g007460	Sb01g032360	neighbouring_reaction_109846<->Reaction<->111131
phytozome	Sb01g007460	Sb01g032360	neighbouring_reaction_109847<->Reaction<->109887
phytozome	Sb01g007460	Sb01g032360	neighbouring_reaction_109847<->Reaction<->114032
phytozome	Sb01g007460	Sb01g032360	neighbouring_reaction_109887<->Reaction<->109847
phytozome	Sb01g007460	Sb01g032360	neighbouring_reaction_109887<->Reaction<->113594
phytozome	Sb01g007460	Sb01g032360	neighbouring_reaction_109887<->Reaction<->113595
phytozome	Sb01g007460	Sb01g032360	neighbouring_reaction_109889<->Reaction<->109846
phytozome	Sb01g007460	Sb01g032360	neighbouring_reaction_109889<->Reaction<->113594
phytozome	Sb01g007460	Sb01g032360	neighbouring_reaction_109889<->Reaction<->113595
phytozome	Sb01g007460	Sb01g032360	neighbouring_reaction_111131<->Reaction<->109846
phytozome	Sb01g007460	Sb01g032360	neighbouring_reaction_113594<->Reaction<->109887
phytozome	Sb01g007460	Sb01g032360	neighbouring_reaction_113594<->Reaction<->109889
phytozome	Sb01g007460	Sb01g032360	neighbouring_reaction_113595<->Reaction<->109887
phytozome	Sb01g007460	Sb01g032360	neighbouring_reaction_113595<->Reaction<->109889
phytozome	Sb01g007460	Sb01g032360	neighbouring_reaction_114032<->Reaction<->109847
phytozome	Sb01g007460	Sb01g032360	neighbouring_reaction_114032<->Reaction<->114246
phytozome	Sb01g007460	Sb01g032360	neighbouring_reaction_114246<->Reaction<->114032
phytozome	Sb01g007460	Sb01g032360	reaction_114032
phytozome	Sb01g007460	Sb02g043990	neighbouring_reaction_109846<->Reaction<->111835
phytozome	Sb01g007460	Sb02g043990	neighbouring_reaction_111835<->Reaction<->109846
phytozome	Sb01g007460	Sb03g002410	neighbouring_reaction_109846<->Reaction<->111835
phytozome	Sb01g007460	Sb03g002410	neighbouring_reaction_111835<->Reaction<->109846
phytozome	Sb01g007460	Sb03g024490	indirect_complex_109839
phytozome	Sb01g007460	Sb03g024490	indirect_complex_109888
phytozome	Sb01g007460	Sb03g024490	neighbouring_reaction_109846<->Reaction<->109889
phytozome	Sb01g007460	Sb03g024490	neighbouring_reaction_109846<->Reaction<->111131
phytozome	Sb01g007460	Sb03g024490	neighbouring_reaction_109846<->Reaction<->111835
phytozome	Sb01g007460	Sb03g024490	neighbouring_reaction_109887<->Reaction<->113594
phytozome	Sb01g007460	Sb03g024490	neighbouring_reaction_109887<->Reaction<->113595
phytozome	Sb01g007460	Sb03g024490	neighbouring_reaction_109889<->Reaction<->109846
phytozome	Sb01g007460	Sb03g024490	neighbouring_reaction_109889<->Reaction<->113594
phytozome	Sb01g007460	Sb03g024490	neighbouring_reaction_109889<->Reaction<->113595
phytozome	Sb01g007460	Sb03g024490	neighbouring_reaction_111131<->Reaction<->109846
phytozome	Sb01g007460	Sb03g024490	neighbouring_reaction_111835<->Reaction<->109846
phytozome	Sb01g007460	Sb03g024490	neighbouring_reaction_113594<->Reaction<->109887
phytozome	Sb01g007460	Sb03g024490	neighbouring_reaction_113594<->Reaction<->109889
phytozome	Sb01g007460	Sb03g024490	neighbouring_reaction_113595<->Reaction<->109887
phytozome	Sb01g007460	Sb03g024490	neighbouring_reaction_113595<->Reaction<->109889
phytozome	Sb01g007460	Sb03g024490	reaction_113594
phytozome	Sb01g007460	Sb04g036050	indirect_complex_109839
phytozome	Sb01g007460	Sb04g036050	indirect_complex_109888
phytozome	Sb01g007460	Sb04g036050	neighbouring_reaction_109846<->Reaction<->109889
phytozome	Sb01g007460	Sb04g036050	neighbouring_reaction_109846<->Reaction<->111131
phytozome	Sb01g007460	Sb04g036050	neighbouring_reaction_109846<->Reaction<->111835
phytozome	Sb01g007460	Sb04g036050	neighbouring_reaction_109887<->Reaction<->113594
phytozome	Sb01g007460	Sb04g036050	neighbouring_reaction_109887<->Reaction<->113595
phytozome	Sb01g007460	Sb04g036050	neighbouring_reaction_109889<->Reaction<->109846
phytozome	Sb01g007460	Sb04g036050	neighbouring_reaction_109889<->Reaction<->113594
phytozome	Sb01g007460	Sb04g036050	neighbouring_reaction_109889<->Reaction<->113595
phytozome	Sb01g007460	Sb04g036050	neighbouring_reaction_111131<->Reaction<->109846
phytozome	Sb01g007460	Sb04g036050	neighbouring_reaction_111835<->Reaction<->109846
phytozome	Sb01g007460	Sb04g036050	neighbouring_reaction_113594<->Reaction<->109887
phytozome	Sb01g007460	Sb04g036050	neighbouring_reaction_113594<->Reaction<->109889
phytozome	Sb01g007460	Sb04g036050	neighbouring_reaction_113595<->Reaction<->109887
phytozome	Sb01g007460	Sb04g036050	neighbouring_reaction_113595<->Reaction<->109889
phytozome	Sb01g007460	Sb04g036050	reaction_113594
phytozome	Sb01g007460	Sb06g017330	indirect_complex_109839
phytozome	Sb01g007460	Sb06g017330	indirect_complex_109888
phytozome	Sb01g007460	Sb06g017330	neighbouring_reaction_109846<->Reaction<->109889
phytozome	Sb01g007460	Sb06g017330	neighbouring_reaction_109846<->Reaction<->111131
phytozome	Sb01g007460	Sb06g017330	neighbouring_reaction_109846<->Reaction<->111835
phytozome	Sb01g007460	Sb06g017330	neighbouring_reaction_109887<->Reaction<->113594
phytozome	Sb01g007460	Sb06g017330	neighbouring_reaction_109887<->Reaction<->113595
phytozome	Sb01g007460	Sb06g017330	neighbouring_reaction_109889<->Reaction<->109846
phytozome	Sb01g007460	Sb06g017330	neighbouring_reaction_109889<->Reaction<->113594
phytozome	Sb01g007460	Sb06g017330	neighbouring_reaction_109889<->Reaction<->113595
phytozome	Sb01g007460	Sb06g017330	neighbouring_reaction_111131<->Reaction<->109846
phytozome	Sb01g007460	Sb06g017330	neighbouring_reaction_111835<->Reaction<->109846
phytozome	Sb01g007460	Sb06g017330	neighbouring_reaction_113594<->Reaction<->109887
phytozome	Sb01g007460	Sb06g017330	neighbouring_reaction_113594<->Reaction<->109889
phytozome	Sb01g007460	Sb06g017330	neighbouring_reaction_113595<->Reaction<->109887
phytozome	Sb01g007460	Sb06g017330	neighbouring_reaction_113595<->Reaction<->109889
phytozome	Sb01g007460	Sb06g017330	reaction_113594
phytozome	Sb01g007460	Sb06g033210	neighbouring_reaction_109846<->Reaction<->111835
phytozome	Sb01g007460	Sb06g033210	neighbouring_reaction_111835<->Reaction<->109846
phytozome	Sb01g007460	Sb06g033210	neighbouring_reaction_109846<->Reaction<->111835
phytozome	Sb01g007460	Sb06g033210	neighbouring_reaction_111835<->Reaction<->109846
phytozome	Sb01g007460	Sb07g022680	neighbouring_reaction_111129<->Reaction<->111131
phytozome	Sb01g007460	Sb07g022680	neighbouring_reaction_111131<->Reaction<->111129
phytozome	Sb01g007460	Sb08g018160	indirect_complex_109839
phytozome	Sb01g007460	Sb08g018160	indirect_complex_109888
phytozome	Sb01g007460	Sb08g018160	neighbouring_reaction_109846<->Reaction<->109889
phytozome	Sb01g007460	Sb08g018160	neighbouring_reaction_109846<->Reaction<->111131
phytozome	Sb01g007460	Sb08g018160	neighbouring_reaction_109846<->Reaction<->111835
phytozome	Sb01g007460	Sb08g018160	neighbouring_reaction_109887<->Reaction<->113594
phytozome	Sb01g007460	Sb08g018160	neighbouring_reaction_109887<->Reaction<->113595
phytozome	Sb01g007460	Sb08g018160	neighbouring_reaction_109889<->Reaction<->109846
phytozome	Sb01g007460	Sb08g018160	neighbouring_reaction_109889<->Reaction<->113594
phytozome	Sb01g007460	Sb08g018160	neighbouring_reaction_109889<->Reaction<->113595
phytozome	Sb01g007460	Sb08g018160	neighbouring_reaction_111131<->Reaction<->109846
phytozome	Sb01g007460	Sb08g018160	neighbouring_reaction_111835<->Reaction<->109846
phytozome	Sb01g007460	Sb08g018160	neighbouring_reaction_113594<->Reaction<->109887
phytozome	Sb01g007460	Sb08g018160	neighbouring_reaction_113594<->Reaction<->109889
phytozome	Sb01g007460	Sb08g018160	neighbouring_reaction_113595<->Reaction<->109887
phytozome	Sb01g007460	Sb08g018160	neighbouring_reaction_113595<->Reaction<->109889
phytozome	Sb01g007460	Sb08g018160	reaction_113594
phytozome	Sb01g007460	Sb09g003270	neighbouring_reaction_109846<->Reaction<->111835
phytozome	Sb01g007460	Sb09g003270	neighbouring_reaction_111835<->Reaction<->109846
phytozome	Sb01g007460	Sb09g008010	indirect_complex_109839
phytozome	Sb01g007460	Sb09g008010	indirect_complex_109888
phytozome	Sb01g007460	Sb09g008010	neighbouring_reaction_109846<->Reaction<->109889
phytozome	Sb01g007460	Sb09g008010	neighbouring_reaction_109846<->Reaction<->111131
phytozome	Sb01g007460	Sb09g008010	neighbouring_reaction_109846<->Reaction<->111835
phytozome	Sb01g007460	Sb09g008010	neighbouring_reaction_109887<->Reaction<->113594
phytozome	Sb01g007460	Sb09g008010	neighbouring_reaction_109887<->Reaction<->113595
phytozome	Sb01g007460	Sb09g008010	neighbouring_reaction_109889<->Reaction<->109846
phytozome	Sb01g007460	Sb09g008010	neighbouring_reaction_109889<->Reaction<->113594
phytozome	Sb01g007460	Sb09g008010	neighbouring_reaction_109889<->Reaction<->113595
phytozome	Sb01g007460	Sb09g008010	neighbouring_reaction_111131<->Reaction<->109846
phytozome	Sb01g007460	Sb09g008010	neighbouring_reaction_111835<->Reaction<->109846
phytozome	Sb01g007460	Sb09g008010	neighbouring_reaction_113594<->Reaction<->109887
phytozome	Sb01g007460	Sb09g008010	neighbouring_reaction_113594<->Reaction<->109889
phytozome	Sb01g007460	Sb09g008010	neighbouring_reaction_113595<->Reaction<->109887
phytozome	Sb01g007460	Sb09g008010	neighbouring_reaction_113595<->Reaction<->109889
phytozome	Sb01g007460	Sb09g008010	reaction_113594
phytozome	Sb01g007460	Sb09g022830	indirect_complex_109844
phytozome	Sb01g007460	Sb09g022830	neighbouring_reaction_109846<->Reaction<->109889
phytozome	Sb01g007460	Sb09g022830	neighbouring_reaction_109846<->Reaction<->111131
phytozome	Sb01g007460	Sb09g022830	neighbouring_reaction_109846<->Reaction<->111835
phytozome	Sb01g007460	Sb09g022830	neighbouring_reaction_109887<->Reaction<->113595
phytozome	Sb01g007460	Sb09g022830	neighbouring_reaction_109889<->Reaction<->109846
phytozome	Sb01g007460	Sb09g022830	neighbouring_reaction_109889<->Reaction<->113594
phytozome	Sb01g007460	Sb09g022830	neighbouring_reaction_109889<->Reaction<->113595
phytozome	Sb01g007460	Sb09g022830	neighbouring_reaction_111131<->Reaction<->109846
phytozome	Sb01g007460	Sb09g022830	neighbouring_reaction_111835<->Reaction<->109846
phytozome	Sb01g007460	Sb09g022830	neighbouring_reaction_113594<->Reaction<->109889
phytozome	Sb01g007460	Sb09g022830	neighbouring_reaction_113595<->Reaction<->109887
phytozome	Sb01g007460	Sb09g022830	neighbouring_reaction_113595<->Reaction<->109889
phytozome	Sb01g007460	Sb09g022830	reaction_113595
phytozome	Sb01g007460	Sb09g023360	indirect_complex_109839
phytozome	Sb01g007460	Sb09g023360	indirect_complex_109888
phytozome	Sb01g007460	Sb09g023360	neighbouring_reaction_109846<->Reaction<->109889
phytozome	Sb01g007460	Sb09g023360	neighbouring_reaction_109846<->Reaction<->111131
phytozome	Sb01g007460	Sb09g023360	neighbouring_reaction_109846<->Reaction<->111835
phytozome	Sb01g007460	Sb09g023360	neighbouring_reaction_109887<->Reaction<->113594
phytozome	Sb01g007460	Sb09g023360	neighbouring_reaction_109887<->Reaction<->113595
phytozome	Sb01g007460	Sb09g023360	neighbouring_reaction_109889<->Reaction<->109846
phytozome	Sb01g007460	Sb09g023360	neighbouring_reaction_109889<->Reaction<->113594
phytozome	Sb01g007460	Sb09g023360	neighbouring_reaction_109889<->Reaction<->113595
phytozome	Sb01g007460	Sb09g023360	neighbouring_reaction_111131<->Reaction<->109846
phytozome	Sb01g007460	Sb09g023360	neighbouring_reaction_111835<->Reaction<->109846
phytozome	Sb01g007460	Sb09g023360	neighbouring_reaction_113594<->Reaction<->109887
phytozome	Sb01g007460	Sb09g023360	neighbouring_reaction_113594<->Reaction<->109889
phytozome	Sb01g007460	Sb09g023360	neighbouring_reaction_113595<->Reaction<->109887
phytozome	Sb01g007460	Sb09g023360	neighbouring_reaction_113595<->Reaction<->109889
phytozome	Sb01g007460	Sb09g023360	reaction_113594
phytozome	Sb01g007460	Sb10g007540	indirect_complex_109844
phytozome	Sb01g007460	Sb10g007540	neighbouring_reaction_109846<->Reaction<->109889
phytozome	Sb01g007460	Sb10g007540	neighbouring_reaction_109846<->Reaction<->111131
phytozome	Sb01g007460	Sb10g007540	neighbouring_reaction_109887<->Reaction<->113595
phytozome	Sb01g007460	Sb10g007540	neighbouring_reaction_109889<->Reaction<->109846
phytozome	Sb01g007460	Sb10g007540	neighbouring_reaction_109889<->Reaction<->113594
phytozome	Sb01g007460	Sb10g007540	neighbouring_reaction_109889<->Reaction<->113595
phytozome	Sb01g007460	Sb10g007540	neighbouring_reaction_111131<->Reaction<->109846
phytozome	Sb01g007460	Sb10g007540	neighbouring_reaction_113594<->Reaction<->109889
phytozome	Sb01g007460	Sb10g007540	neighbouring_reaction_113595<->Reaction<->109887
phytozome	Sb01g007460	Sb10g007540	neighbouring_reaction_113595<->Reaction<->109889
phytozome	Sb01g007460	Sb10g007540	reaction_113595
phytozome	Sb01g007560	Sb01g021190	neighbouring_reaction_115006<->Reaction<->115687
phytozome	Sb01g007560	Sb01g021190	neighbouring_reaction_115687<->Reaction<->115006
phytozome	Sb01g007560	Sb02g042100	neighbouring_reaction_112626<->Reaction<->113555
phytozome	Sb01g007560	Sb02g042100	neighbouring_reaction_113555<->Reaction<->112626
phytozome	Sb01g007560	Sb03g032830	neighbouring_reaction_113406<->Reaction<->115012
phytozome	Sb01g007560	Sb03g032830	neighbouring_reaction_115012<->Reaction<->113406
phytozome	Sb01g007560	Sb04g028060	neighbouring_reaction_115006<->Reaction<->115687
phytozome	Sb01g007560	Sb04g028060	neighbouring_reaction_115687<->Reaction<->115006
phytozome	Sb01g007560	Sb10g008200	neighbouring_reaction_115006<->Reaction<->115687
phytozome	Sb01g007560	Sb10g008200	neighbouring_reaction_115687<->Reaction<->115006
phytozome	Sb01g007560	Sb01g021190	neighbouring_reaction_115006<->Reaction<->115687
phytozome	Sb01g007560	Sb01g021190	neighbouring_reaction_115687<->Reaction<->115006
phytozome	Sb01g007560	Sb02g042100	neighbouring_reaction_112626<->Reaction<->113555
phytozome	Sb01g007560	Sb02g042100	neighbouring_reaction_113555<->Reaction<->112626
phytozome	Sb01g007560	Sb03g032830	neighbouring_reaction_113406<->Reaction<->115012
phytozome	Sb01g007560	Sb03g032830	neighbouring_reaction_115012<->Reaction<->113406
phytozome	Sb01g007560	Sb04g028060	neighbouring_reaction_115006<->Reaction<->115687
phytozome	Sb01g007560	Sb04g028060	neighbouring_reaction_115687<->Reaction<->115006
phytozome	Sb01g007560	Sb10g008200	neighbouring_reaction_115006<->Reaction<->115687
phytozome	Sb01g007560	Sb10g008200	neighbouring_reaction_115687<->Reaction<->115006
phytozome	Sb01g007580	Sb02g030500	neighbouring_reaction_115460<->Reaction<->115602
phytozome	Sb01g007580	Sb02g030500	neighbouring_reaction_115602<->Reaction<->115460
phytozome	Sb01g007580	Sb03g047200	neighbouring_reaction_115602<->Reaction<->115647
phytozome	Sb01g007580	Sb03g047200	neighbouring_reaction_115647<->Reaction<->115602
phytozome	Sb01g007580	Sb02g030500	neighbouring_reaction_115460<->Reaction<->115602
phytozome	Sb01g007580	Sb02g030500	neighbouring_reaction_115602<->Reaction<->115460
phytozome	Sb01g007580	Sb03g047200	neighbouring_reaction_115602<->Reaction<->115647
phytozome	Sb01g007580	Sb03g047200	neighbouring_reaction_115647<->Reaction<->115602
phytozome	Sb01g007580	Sb02g030500	neighbouring_reaction_115460<->Reaction<->115602
phytozome	Sb01g007580	Sb02g030500	neighbouring_reaction_115602<->Reaction<->115460
phytozome	Sb01g007580	Sb03g047200	neighbouring_reaction_115602<->Reaction<->115647
phytozome	Sb01g007580	Sb03g047200	neighbouring_reaction_115647<->Reaction<->115602
phytozome	Sb01g007580	Sb02g030500	neighbouring_reaction_115460<->Reaction<->115602
phytozome	Sb01g007580	Sb02g030500	neighbouring_reaction_115602<->Reaction<->115460
phytozome	Sb01g007580	Sb03g047200	neighbouring_reaction_115602<->Reaction<->115647
phytozome	Sb01g007580	Sb03g047200	neighbouring_reaction_115647<->Reaction<->115602
phytozome	Sb01g007580	Sb02g030500	neighbouring_reaction_115460<->Reaction<->115602
phytozome	Sb01g007580	Sb02g030500	neighbouring_reaction_115602<->Reaction<->115460
phytozome	Sb01g007580	Sb03g047200	neighbouring_reaction_115602<->Reaction<->115647
phytozome	Sb01g007580	Sb03g047200	neighbouring_reaction_115647<->Reaction<->115602
phytozome	Sb01g007850	Sb01g006190	direct_complex_114548
phytozome	Sb01g007850	Sb01g006190	neighbouring_reaction_114523<->Reaction<->114549
phytozome	Sb01g007850	Sb01g006190	neighbouring_reaction_114549<->Reaction<->114523
phytozome	Sb01g007850	Sb01g006190	reaction_114549
phytozome	Sb01g007850	Sb01g007850	neighbouring_reaction_108411<->Reaction<->114532
phytozome	Sb01g007850	Sb01g007850	neighbouring_reaction_108411<->Reaction<->115253
phytozome	Sb01g007850	Sb01g007850	neighbouring_reaction_114532<->Reaction<->108411
phytozome	Sb01g007850	Sb01g007850	neighbouring_reaction_115253<->Reaction<->108411
phytozome	Sb01g007850	Sb01g009920	neighbouring_reaction_108411<->Reaction<->114532
phytozome	Sb01g007850	Sb01g009920	neighbouring_reaction_108411<->Reaction<->115253
phytozome	Sb01g007850	Sb01g009920	neighbouring_reaction_114532<->Reaction<->108411
phytozome	Sb01g007850	Sb01g009920	neighbouring_reaction_115253<->Reaction<->108411
phytozome	Sb01g007850	Sb01g009920	neighbouring_reaction_108411<->Reaction<->114532
phytozome	Sb01g007850	Sb01g009920	neighbouring_reaction_108411<->Reaction<->115253
phytozome	Sb01g007850	Sb01g009920	neighbouring_reaction_114532<->Reaction<->108411
phytozome	Sb01g007850	Sb01g009920	neighbouring_reaction_115253<->Reaction<->108411
phytozome	Sb01g007850	Sb01g013843	direct_complex_114548
phytozome	Sb01g007850	Sb01g013843	neighbouring_reaction_114523<->Reaction<->114549
phytozome	Sb01g007850	Sb01g013843	neighbouring_reaction_114549<->Reaction<->114523
phytozome	Sb01g007850	Sb01g013843	reaction_114549
phytozome	Sb01g007850	Sb01g037340	neighbouring_reaction_108411<->Reaction<->114532
phytozome	Sb01g007850	Sb01g037340	neighbouring_reaction_108411<->Reaction<->115253
phytozome	Sb01g007850	Sb01g037340	neighbouring_reaction_114532<->Reaction<->108411
phytozome	Sb01g007850	Sb01g037340	neighbouring_reaction_115253<->Reaction<->108411
phytozome	Sb01g007850	Sb02g002760	direct_complex_114548
phytozome	Sb01g007850	Sb02g002760	neighbouring_reaction_114523<->Reaction<->114549
phytozome	Sb01g007850	Sb02g002760	neighbouring_reaction_114549<->Reaction<->114523
phytozome	Sb01g007850	Sb02g002760	reaction_114549
phytozome	Sb01g007850	Sb10g010050	direct_complex_114531
phytozome	Sb01g007850	Sb10g010050	neighbouring_reaction_108411<->Reaction<->114532
phytozome	Sb01g007850	Sb10g010050	neighbouring_reaction_114532<->Reaction<->108411
phytozome	Sb01g007850	Sb10g010050	reaction_114532
phytozome	Sb01g008450	Sb07g026290	neighbouring_reaction_109381<->Reaction<->115055
phytozome	Sb01g008450	Sb07g026290	neighbouring_reaction_115055<->Reaction<->109381
phytozome	Sb01g008690	Sb01g043930	neighbouring_reaction_107849<->Reaction<->109244
phytozome	Sb01g008690	Sb01g043930	neighbouring_reaction_109244<->Reaction<->107849
phytozome	Sb01g008690	Sb02g028900	neighbouring_reaction_107849<->Reaction<->114892
phytozome	Sb01g008690	Sb02g028900	neighbouring_reaction_114892<->Reaction<->107849
phytozome	Sb01g008690	Sb02g028910	neighbouring_reaction_107849<->Reaction<->114892
phytozome	Sb01g008690	Sb02g028910	neighbouring_reaction_114892<->Reaction<->107849
phytozome	Sb01g008690	Sb03g009190	neighbouring_reaction_107849<->Reaction<->114892
phytozome	Sb01g008690	Sb03g009190	neighbouring_reaction_114892<->Reaction<->107849
phytozome	Sb01g008690	Sb03g012990	neighbouring_reaction_107849<->Reaction<->114892
phytozome	Sb01g008690	Sb03g012990	neighbouring_reaction_114892<->Reaction<->107849
phytozome	Sb01g008690	Sb03g013000	neighbouring_reaction_107849<->Reaction<->114892
phytozome	Sb01g008690	Sb03g013000	neighbouring_reaction_114892<->Reaction<->107849
phytozome	Sb01g008690	Sb03g046550	neighbouring_reaction_107849<->Reaction<->114892
phytozome	Sb01g008690	Sb03g046550	neighbouring_reaction_114892<->Reaction<->107849
phytozome	Sb01g008690	Sb05g016730	neighbouring_reaction_107849<->Reaction<->115077
phytozome	Sb01g008690	Sb05g016730	neighbouring_reaction_107849<->Reaction<->115079
phytozome	Sb01g008690	Sb05g016730	neighbouring_reaction_115077<->Reaction<->107849
phytozome	Sb01g008690	Sb05g016730	neighbouring_reaction_115079<->Reaction<->107849
phytozome	Sb01g008690	Sb06g029020	neighbouring_reaction_107849<->Reaction<->115081
phytozome	Sb01g008690	Sb06g029020	neighbouring_reaction_115081<->Reaction<->107849
phytozome	Sb01g008690	Sb07g028080	neighbouring_reaction_107849<->Reaction<->113328
phytozome	Sb01g008690	Sb07g028080	neighbouring_reaction_113328<->Reaction<->107849
phytozome	Sb01g008690	Sb08g003440	neighbouring_reaction_107849<->Reaction<->111953
phytozome	Sb01g008690	Sb08g003440	neighbouring_reaction_111953<->Reaction<->107849
phytozome	Sb01g008690	Sb09g003920	neighbouring_reaction_107849<->Reaction<->107850
phytozome	Sb01g008690	Sb09g003920	neighbouring_reaction_107850<->Reaction<->107849
phytozome	Sb01g008690	Sb10g000400	neighbouring_reaction_107849<->Reaction<->109061
phytozome	Sb01g008690	Sb10g000400	neighbouring_reaction_109061<->Reaction<->107849
phytozome	Sb01g008690	Sb01g043930	neighbouring_reaction_107849<->Reaction<->109244
phytozome	Sb01g008690	Sb01g043930	neighbouring_reaction_109244<->Reaction<->107849
phytozome	Sb01g008690	Sb02g028900	neighbouring_reaction_107849<->Reaction<->114892
phytozome	Sb01g008690	Sb02g028900	neighbouring_reaction_114892<->Reaction<->107849
phytozome	Sb01g008690	Sb02g028910	neighbouring_reaction_107849<->Reaction<->114892
phytozome	Sb01g008690	Sb02g028910	neighbouring_reaction_114892<->Reaction<->107849
phytozome	Sb01g008690	Sb03g009190	neighbouring_reaction_107849<->Reaction<->114892
phytozome	Sb01g008690	Sb03g009190	neighbouring_reaction_114892<->Reaction<->107849
phytozome	Sb01g008690	Sb03g012990	neighbouring_reaction_107849<->Reaction<->114892
phytozome	Sb01g008690	Sb03g012990	neighbouring_reaction_114892<->Reaction<->107849
phytozome	Sb01g008690	Sb03g013000	neighbouring_reaction_107849<->Reaction<->114892
phytozome	Sb01g008690	Sb03g013000	neighbouring_reaction_114892<->Reaction<->107849
phytozome	Sb01g008690	Sb03g046550	neighbouring_reaction_107849<->Reaction<->114892
phytozome	Sb01g008690	Sb03g046550	neighbouring_reaction_114892<->Reaction<->107849
phytozome	Sb01g008690	Sb05g016730	neighbouring_reaction_107849<->Reaction<->115077
phytozome	Sb01g008690	Sb05g016730	neighbouring_reaction_107849<->Reaction<->115079
phytozome	Sb01g008690	Sb05g016730	neighbouring_reaction_115077<->Reaction<->107849
phytozome	Sb01g008690	Sb05g016730	neighbouring_reaction_115079<->Reaction<->107849
phytozome	Sb01g008690	Sb06g029020	neighbouring_reaction_107849<->Reaction<->115081
phytozome	Sb01g008690	Sb06g029020	neighbouring_reaction_115081<->Reaction<->107849
phytozome	Sb01g008690	Sb07g028080	neighbouring_reaction_107849<->Reaction<->113328
phytozome	Sb01g008690	Sb07g028080	neighbouring_reaction_113328<->Reaction<->107849
phytozome	Sb01g008690	Sb08g003440	neighbouring_reaction_107849<->Reaction<->111953
phytozome	Sb01g008690	Sb08g003440	neighbouring_reaction_111953<->Reaction<->107849
phytozome	Sb01g008690	Sb09g003920	neighbouring_reaction_107849<->Reaction<->107850
phytozome	Sb01g008690	Sb09g003920	neighbouring_reaction_107850<->Reaction<->107849
phytozome	Sb01g008690	Sb10g000400	neighbouring_reaction_107849<->Reaction<->109061
phytozome	Sb01g008690	Sb10g000400	neighbouring_reaction_109061<->Reaction<->107849
phytozome	Sb01g008840	Sb10g030120	direct_complex_114039
phytozome	Sb01g008840	Sb10g030120	neighbouring_reaction_114040<->Reaction<->114042
phytozome	Sb01g008840	Sb10g030120	neighbouring_reaction_114042<->Reaction<->114040
phytozome	Sb01g008840	Sb10g030120	reaction_114040
phytozome	Sb01g009140	Sb04g025290	neighbouring_reaction_106007<->Reaction<->106585
phytozome	Sb01g009140	Sb04g025290	neighbouring_reaction_106585<->Reaction<->106007
phytozome	Sb01g009880	Sb01g015190	neighbouring_reaction_113097<->Reaction<->113134
phytozome	Sb01g009880	Sb01g015190	neighbouring_reaction_113134<->Reaction<->113097
phytozome	Sb01g009880	Sb01g038460	neighbouring_reaction_109137<->Reaction<->113134
phytozome	Sb01g009880	Sb01g038460	neighbouring_reaction_113134<->Reaction<->109137
phytozome	Sb01g009880	Sb01g038460	neighbouring_reaction_109137<->Reaction<->113134
phytozome	Sb01g009880	Sb01g038460	neighbouring_reaction_113134<->Reaction<->109137
phytozome	Sb01g009880	Sb01g038460	neighbouring_reaction_109137<->Reaction<->113134
phytozome	Sb01g009880	Sb01g038460	neighbouring_reaction_113134<->Reaction<->109137
phytozome	Sb01g009880	Sb05g000440	neighbouring_reaction_109137<->Reaction<->113134
phytozome	Sb01g009880	Sb05g000440	neighbouring_reaction_113134<->Reaction<->109137
phytozome	Sb01g009880	Sb08g008320	neighbouring_reaction_109154<->Reaction<->113134
phytozome	Sb01g009880	Sb08g008320	neighbouring_reaction_113134<->Reaction<->109154
phytozome	Sb01g009880	Sb10g009590	neighbouring_reaction_109137<->Reaction<->113134
phytozome	Sb01g009880	Sb10g009590	neighbouring_reaction_113134<->Reaction<->109137
phytozome	Sb01g009920	Sb01g006190	direct_complex_114548
phytozome	Sb01g009920	Sb01g006190	neighbouring_reaction_114523<->Reaction<->114549
phytozome	Sb01g009920	Sb01g006190	neighbouring_reaction_114549<->Reaction<->114523
phytozome	Sb01g009920	Sb01g006190	reaction_114549
phytozome	Sb01g009920	Sb01g009920	neighbouring_reaction_108411<->Reaction<->114532
phytozome	Sb01g009920	Sb01g009920	neighbouring_reaction_108411<->Reaction<->115253
phytozome	Sb01g009920	Sb01g009920	neighbouring_reaction_114532<->Reaction<->108411
phytozome	Sb01g009920	Sb01g009920	neighbouring_reaction_115253<->Reaction<->108411
phytozome	Sb01g009920	Sb01g013843	direct_complex_114548
phytozome	Sb01g009920	Sb01g013843	neighbouring_reaction_114523<->Reaction<->114549
phytozome	Sb01g009920	Sb01g013843	neighbouring_reaction_114549<->Reaction<->114523
phytozome	Sb01g009920	Sb01g013843	reaction_114549
phytozome	Sb01g009920	Sb02g002760	direct_complex_114548
phytozome	Sb01g009920	Sb02g002760	neighbouring_reaction_114523<->Reaction<->114549
phytozome	Sb01g009920	Sb02g002760	neighbouring_reaction_114549<->Reaction<->114523
phytozome	Sb01g009920	Sb02g002760	reaction_114549
phytozome	Sb01g009920	Sb10g010050	direct_complex_114531
phytozome	Sb01g009920	Sb10g010050	neighbouring_reaction_108411<->Reaction<->114532
phytozome	Sb01g009920	Sb10g010050	neighbouring_reaction_114532<->Reaction<->108411
phytozome	Sb01g009920	Sb10g010050	reaction_114532
phytozome	Sb01g009920	Sb01g006190	direct_complex_114548
phytozome	Sb01g009920	Sb01g006190	neighbouring_reaction_114523<->Reaction<->114549
phytozome	Sb01g009920	Sb01g006190	neighbouring_reaction_114549<->Reaction<->114523
phytozome	Sb01g009920	Sb01g006190	reaction_114549
phytozome	Sb01g009920	Sb01g009920	neighbouring_reaction_108411<->Reaction<->114532
phytozome	Sb01g009920	Sb01g009920	neighbouring_reaction_108411<->Reaction<->115253
phytozome	Sb01g009920	Sb01g009920	neighbouring_reaction_114532<->Reaction<->108411
phytozome	Sb01g009920	Sb01g009920	neighbouring_reaction_115253<->Reaction<->108411
phytozome	Sb01g009920	Sb01g009920	neighbouring_reaction_108411<->Reaction<->114532
phytozome	Sb01g009920	Sb01g009920	neighbouring_reaction_108411<->Reaction<->115253
phytozome	Sb01g009920	Sb01g009920	neighbouring_reaction_114532<->Reaction<->108411
phytozome	Sb01g009920	Sb01g009920	neighbouring_reaction_115253<->Reaction<->108411
phytozome	Sb01g009920	Sb01g013843	direct_complex_114548
phytozome	Sb01g009920	Sb01g013843	neighbouring_reaction_114523<->Reaction<->114549
phytozome	Sb01g009920	Sb01g013843	neighbouring_reaction_114549<->Reaction<->114523
phytozome	Sb01g009920	Sb01g013843	reaction_114549
phytozome	Sb01g009920	Sb02g002760	direct_complex_114548
phytozome	Sb01g009920	Sb02g002760	neighbouring_reaction_114523<->Reaction<->114549
phytozome	Sb01g009920	Sb02g002760	neighbouring_reaction_114549<->Reaction<->114523
phytozome	Sb01g009920	Sb02g002760	reaction_114549
phytozome	Sb01g009920	Sb10g010050	direct_complex_114531
phytozome	Sb01g009920	Sb10g010050	neighbouring_reaction_108411<->Reaction<->114532
phytozome	Sb01g009920	Sb10g010050	neighbouring_reaction_114532<->Reaction<->108411
phytozome	Sb01g009920	Sb10g010050	reaction_114532
phytozome	Sb01g009920	Sb01g006190	direct_complex_114548
phytozome	Sb01g009920	Sb01g006190	neighbouring_reaction_114523<->Reaction<->114549
phytozome	Sb01g009920	Sb01g006190	neighbouring_reaction_114549<->Reaction<->114523
phytozome	Sb01g009920	Sb01g006190	reaction_114549
phytozome	Sb01g009920	Sb01g007850	neighbouring_reaction_108411<->Reaction<->114532
phytozome	Sb01g009920	Sb01g007850	neighbouring_reaction_108411<->Reaction<->115253
phytozome	Sb01g009920	Sb01g007850	neighbouring_reaction_114532<->Reaction<->108411
phytozome	Sb01g009920	Sb01g007850	neighbouring_reaction_115253<->Reaction<->108411
phytozome	Sb01g009920	Sb01g009920	neighbouring_reaction_108411<->Reaction<->114532
phytozome	Sb01g009920	Sb01g009920	neighbouring_reaction_108411<->Reaction<->115253
phytozome	Sb01g009920	Sb01g009920	neighbouring_reaction_114532<->Reaction<->108411
phytozome	Sb01g009920	Sb01g009920	neighbouring_reaction_115253<->Reaction<->108411
phytozome	Sb01g009920	Sb01g009920	neighbouring_reaction_108411<->Reaction<->114532
phytozome	Sb01g009920	Sb01g009920	neighbouring_reaction_108411<->Reaction<->115253
phytozome	Sb01g009920	Sb01g009920	neighbouring_reaction_114532<->Reaction<->108411
phytozome	Sb01g009920	Sb01g009920	neighbouring_reaction_115253<->Reaction<->108411
phytozome	Sb01g009920	Sb01g009920	neighbouring_reaction_108411<->Reaction<->114532
phytozome	Sb01g009920	Sb01g009920	neighbouring_reaction_108411<->Reaction<->115253
phytozome	Sb01g009920	Sb01g009920	neighbouring_reaction_114532<->Reaction<->108411
phytozome	Sb01g009920	Sb01g009920	neighbouring_reaction_115253<->Reaction<->108411
phytozome	Sb01g009920	Sb01g009930	neighbouring_reaction_108411<->Reaction<->114532
phytozome	Sb01g009920	Sb01g009930	neighbouring_reaction_108411<->Reaction<->115253
phytozome	Sb01g009920	Sb01g009930	neighbouring_reaction_114532<->Reaction<->108411
phytozome	Sb01g009920	Sb01g009930	neighbouring_reaction_115253<->Reaction<->108411
phytozome	Sb01g009920	Sb01g013843	direct_complex_114548
phytozome	Sb01g009920	Sb01g013843	neighbouring_reaction_114523<->Reaction<->114549
phytozome	Sb01g009920	Sb01g013843	neighbouring_reaction_114549<->Reaction<->114523
phytozome	Sb01g009920	Sb01g013843	reaction_114549
phytozome	Sb01g009920	Sb01g037340	neighbouring_reaction_108411<->Reaction<->114532
phytozome	Sb01g009920	Sb01g037340	neighbouring_reaction_108411<->Reaction<->115253
phytozome	Sb01g009920	Sb01g037340	neighbouring_reaction_114532<->Reaction<->108411
phytozome	Sb01g009920	Sb01g037340	neighbouring_reaction_115253<->Reaction<->108411
phytozome	Sb01g009920	Sb02g002760	direct_complex_114548
phytozome	Sb01g009920	Sb02g002760	neighbouring_reaction_114523<->Reaction<->114549
phytozome	Sb01g009920	Sb02g002760	neighbouring_reaction_114549<->Reaction<->114523
phytozome	Sb01g009920	Sb02g002760	reaction_114549
phytozome	Sb01g009920	Sb10g010050	direct_complex_114531
phytozome	Sb01g009920	Sb10g010050	neighbouring_reaction_108411<->Reaction<->114532
phytozome	Sb01g009920	Sb10g010050	neighbouring_reaction_114532<->Reaction<->108411
phytozome	Sb01g009920	Sb10g010050	reaction_114532
phytozome	Sb01g009930	Sb01g006190	direct_complex_114548
phytozome	Sb01g009930	Sb01g006190	neighbouring_reaction_114523<->Reaction<->114549
phytozome	Sb01g009930	Sb01g006190	neighbouring_reaction_114549<->Reaction<->114523
phytozome	Sb01g009930	Sb01g006190	reaction_114549
phytozome	Sb01g009930	Sb01g007850	neighbouring_reaction_108411<->Reaction<->114532
phytozome	Sb01g009930	Sb01g007850	neighbouring_reaction_108411<->Reaction<->115253
phytozome	Sb01g009930	Sb01g007850	neighbouring_reaction_114532<->Reaction<->108411
phytozome	Sb01g009930	Sb01g007850	neighbouring_reaction_115253<->Reaction<->108411
phytozome	Sb01g009930	Sb01g009920	neighbouring_reaction_108411<->Reaction<->114532
phytozome	Sb01g009930	Sb01g009920	neighbouring_reaction_108411<->Reaction<->115253
phytozome	Sb01g009930	Sb01g009920	neighbouring_reaction_114532<->Reaction<->108411
phytozome	Sb01g009930	Sb01g009920	neighbouring_reaction_115253<->Reaction<->108411
phytozome	Sb01g009930	Sb01g009920	neighbouring_reaction_108411<->Reaction<->114532
phytozome	Sb01g009930	Sb01g009920	neighbouring_reaction_108411<->Reaction<->115253
phytozome	Sb01g009930	Sb01g009920	neighbouring_reaction_114532<->Reaction<->108411
phytozome	Sb01g009930	Sb01g009920	neighbouring_reaction_115253<->Reaction<->108411
phytozome	Sb01g009930	Sb01g009930	neighbouring_reaction_108411<->Reaction<->114532
phytozome	Sb01g009930	Sb01g009930	neighbouring_reaction_108411<->Reaction<->115253
phytozome	Sb01g009930	Sb01g009930	neighbouring_reaction_114532<->Reaction<->108411
phytozome	Sb01g009930	Sb01g009930	neighbouring_reaction_115253<->Reaction<->108411
phytozome	Sb01g009930	Sb01g013843	direct_complex_114548
phytozome	Sb01g009930	Sb01g013843	neighbouring_reaction_114523<->Reaction<->114549
phytozome	Sb01g009930	Sb01g013843	neighbouring_reaction_114549<->Reaction<->114523
phytozome	Sb01g009930	Sb01g013843	reaction_114549
phytozome	Sb01g009930	Sb01g037340	neighbouring_reaction_108411<->Reaction<->114532
phytozome	Sb01g009930	Sb01g037340	neighbouring_reaction_108411<->Reaction<->115253
phytozome	Sb01g009930	Sb01g037340	neighbouring_reaction_114532<->Reaction<->108411
phytozome	Sb01g009930	Sb01g037340	neighbouring_reaction_115253<->Reaction<->108411
phytozome	Sb01g009930	Sb02g002760	direct_complex_114548
phytozome	Sb01g009930	Sb02g002760	neighbouring_reaction_114523<->Reaction<->114549
phytozome	Sb01g009930	Sb02g002760	neighbouring_reaction_114549<->Reaction<->114523
phytozome	Sb01g009930	Sb02g002760	reaction_114549
phytozome	Sb01g009930	Sb10g010050	direct_complex_114531
phytozome	Sb01g009930	Sb10g010050	neighbouring_reaction_108411<->Reaction<->114532
phytozome	Sb01g009930	Sb10g010050	neighbouring_reaction_114532<->Reaction<->108411
phytozome	Sb01g009930	Sb10g010050	reaction_114532
phytozome	Sb01g010060	Sb01g038460	neighbouring_reaction_109124<->Reaction<->109137
phytozome	Sb01g010060	Sb01g038460	neighbouring_reaction_109137<->Reaction<->109124
phytozome	Sb01g010060	Sb01g038460	neighbouring_reaction_109124<->Reaction<->109137
phytozome	Sb01g010060	Sb01g038460	neighbouring_reaction_109137<->Reaction<->109124
phytozome	Sb01g010060	Sb01g038460	neighbouring_reaction_109124<->Reaction<->109137
phytozome	Sb01g010060	Sb01g038460	neighbouring_reaction_109137<->Reaction<->109124
phytozome	Sb01g010060	Sb05g000440	neighbouring_reaction_109124<->Reaction<->109137
phytozome	Sb01g010060	Sb05g000440	neighbouring_reaction_109137<->Reaction<->109124
phytozome	Sb01g010060	Sb10g009590	neighbouring_reaction_109124<->Reaction<->109137
phytozome	Sb01g010060	Sb10g009590	neighbouring_reaction_109137<->Reaction<->109124
phytozome	Sb01g010140	Sb09g001230	neighbouring_reaction_108866<->Reaction<->108888
phytozome	Sb01g010140	Sb09g001230	neighbouring_reaction_108888<->Reaction<->108866
phytozome	Sb01g010140	Sb09g006040	neighbouring_reaction_108866<->Reaction<->108888
phytozome	Sb01g010140	Sb09g006040	neighbouring_reaction_108888<->Reaction<->108866
phytozome	Sb01g010240	Sb01g010240	neighbouring_reaction_111186<->Reaction<->111186
phytozome	Sb01g010240	Sb01g010240	neighbouring_reaction_111186<->Reaction<->111194
phytozome	Sb01g010240	Sb01g010240	neighbouring_reaction_111186<->Reaction<->111195
phytozome	Sb01g010240	Sb01g010240	neighbouring_reaction_111186<->Reaction<->111203
phytozome	Sb01g010240	Sb01g010240	neighbouring_reaction_111194<->Reaction<->111186
phytozome	Sb01g010240	Sb01g010240	neighbouring_reaction_111195<->Reaction<->111186
phytozome	Sb01g010240	Sb01g010240	neighbouring_reaction_111203<->Reaction<->111186
phytozome	Sb01g010240	Sb01g010240	neighbouring_reaction_111186<->Reaction<->111186
phytozome	Sb01g010240	Sb01g010240	neighbouring_reaction_111186<->Reaction<->111194
phytozome	Sb01g010240	Sb01g010240	neighbouring_reaction_111186<->Reaction<->111195
phytozome	Sb01g010240	Sb01g010240	neighbouring_reaction_111186<->Reaction<->111203
phytozome	Sb01g010240	Sb01g010240	neighbouring_reaction_111194<->Reaction<->111186
phytozome	Sb01g010240	Sb01g010240	neighbouring_reaction_111195<->Reaction<->111186
phytozome	Sb01g010240	Sb01g010240	neighbouring_reaction_111203<->Reaction<->111186
phytozome	Sb01g010240	Sb01g010240	neighbouring_reaction_111186<->Reaction<->111186
phytozome	Sb01g010240	Sb01g010240	neighbouring_reaction_111186<->Reaction<->111194
phytozome	Sb01g010240	Sb01g010240	neighbouring_reaction_111186<->Reaction<->111195
phytozome	Sb01g010240	Sb01g010240	neighbouring_reaction_111186<->Reaction<->111203
phytozome	Sb01g010240	Sb01g010240	neighbouring_reaction_111194<->Reaction<->111186
phytozome	Sb01g010240	Sb01g010240	neighbouring_reaction_111195<->Reaction<->111186
phytozome	Sb01g010240	Sb01g010240	neighbouring_reaction_111203<->Reaction<->111186
phytozome	Sb01g010240	Sb01g028560	neighbouring_reaction_111186<->Reaction<->111186
phytozome	Sb01g010240	Sb01g028560	neighbouring_reaction_111186<->Reaction<->111194
phytozome	Sb01g010240	Sb01g028560	neighbouring_reaction_111186<->Reaction<->111195
phytozome	Sb01g010240	Sb01g028560	neighbouring_reaction_111186<->Reaction<->111203
phytozome	Sb01g010240	Sb01g028560	neighbouring_reaction_111194<->Reaction<->111186
phytozome	Sb01g010240	Sb01g028560	neighbouring_reaction_111195<->Reaction<->111186
phytozome	Sb01g010240	Sb01g028560	neighbouring_reaction_111203<->Reaction<->111186
phytozome	Sb01g010240	Sb03g031260	neighbouring_reaction_111186<->Reaction<->111186
phytozome	Sb01g010240	Sb03g031260	neighbouring_reaction_111186<->Reaction<->111194
phytozome	Sb01g010240	Sb03g031260	neighbouring_reaction_111186<->Reaction<->111195
phytozome	Sb01g010240	Sb03g031260	neighbouring_reaction_111186<->Reaction<->111203
phytozome	Sb01g010240	Sb03g031260	neighbouring_reaction_111194<->Reaction<->111186
phytozome	Sb01g010240	Sb03g031260	neighbouring_reaction_111195<->Reaction<->111186
phytozome	Sb01g010240	Sb03g031260	neighbouring_reaction_111203<->Reaction<->111186
phytozome	Sb01g010250	Sb01g008690	neighbouring_reaction_107849<->Reaction<->113331
phytozome	Sb01g010250	Sb01g008690	neighbouring_reaction_113331<->Reaction<->107849
phytozome	Sb01g010250	Sb01g008690	neighbouring_reaction_107849<->Reaction<->113331
phytozome	Sb01g010250	Sb01g008690	neighbouring_reaction_113331<->Reaction<->107849
phytozome	Sb01g010250	Sb01g043930	neighbouring_reaction_109244<->Reaction<->113331
phytozome	Sb01g010250	Sb01g043930	neighbouring_reaction_113331<->Reaction<->109244
phytozome	Sb01g010250	Sb03g031880	neighbouring_reaction_113363<->Reaction<->114098
phytozome	Sb01g010250	Sb03g031880	neighbouring_reaction_114098<->Reaction<->113363
phytozome	Sb01g010250	Sb07g028080	neighbouring_reaction_113328<->Reaction<->113331
phytozome	Sb01g010250	Sb07g028080	neighbouring_reaction_113331<->Reaction<->113328
phytozome	Sb01g010250	Sb09g027430	neighbouring_reaction_113363<->Reaction<->114098
phytozome	Sb01g010250	Sb09g027430	neighbouring_reaction_114098<->Reaction<->113363
phytozome	Sb01g010280	Sb01g006480	neighbouring_reaction_108588<->Reaction<->110535
phytozome	Sb01g010280	Sb01g006480	neighbouring_reaction_110535<->Reaction<->108588
phytozome	Sb01g010280	Sb01g006480	neighbouring_reaction_108588<->Reaction<->110535
phytozome	Sb01g010280	Sb01g006480	neighbouring_reaction_110535<->Reaction<->108588
phytozome	Sb01g010280	Sb01g007560	neighbouring_reaction_108581<->Reaction<->113406
phytozome	Sb01g010280	Sb01g007560	neighbouring_reaction_113406<->Reaction<->108581
phytozome	Sb01g010280	Sb01g007560	neighbouring_reaction_108581<->Reaction<->113406
phytozome	Sb01g010280	Sb01g007560	neighbouring_reaction_113406<->Reaction<->108581
phytozome	Sb01g010280	Sb02g004280	neighbouring_reaction_110669<->Reaction<->110676
phytozome	Sb01g010280	Sb02g004280	neighbouring_reaction_110676<->Reaction<->110669
phytozome	Sb01g010280	Sb02g004280	neighbouring_reaction_110669<->Reaction<->110676
phytozome	Sb01g010280	Sb02g004280	neighbouring_reaction_110676<->Reaction<->110669
phytozome	Sb01g010280	Sb02g020410	neighbouring_reaction_108992<->Reaction<->110535
phytozome	Sb01g010280	Sb02g020410	neighbouring_reaction_110535<->Reaction<->108992
phytozome	Sb01g010280	Sb02g027000	neighbouring_reaction_108581<->Reaction<->108595
phytozome	Sb01g010280	Sb02g027000	neighbouring_reaction_108592<->Reaction<->110536
phytozome	Sb01g010280	Sb02g027000	neighbouring_reaction_108595<->Reaction<->108581
phytozome	Sb01g010280	Sb02g027000	neighbouring_reaction_108596<->Reaction<->110536
phytozome	Sb01g010280	Sb02g027000	neighbouring_reaction_110536<->Reaction<->108592
phytozome	Sb01g010280	Sb02g027000	neighbouring_reaction_110536<->Reaction<->108596
phytozome	Sb01g010280	Sb03g040060	neighbouring_reaction_108581<->Reaction<->113406
phytozome	Sb01g010280	Sb03g040060	neighbouring_reaction_113406<->Reaction<->108581
phytozome	Sb01g010280	Sb07g012320	neighbouring_reaction_108992<->Reaction<->110535
phytozome	Sb01g010280	Sb07g012320	neighbouring_reaction_110535<->Reaction<->108992
phytozome	Sb01g010280	Sb07g012320	neighbouring_reaction_108992<->Reaction<->110535
phytozome	Sb01g010280	Sb07g012320	neighbouring_reaction_110535<->Reaction<->108992
phytozome	Sb01g010470	Sb01g010470	neighbouring_reaction_106173<->Reaction<->107876
phytozome	Sb01g010470	Sb01g010470	neighbouring_reaction_106174<->Reaction<->107961
phytozome	Sb01g010470	Sb01g010470	neighbouring_reaction_107876<->Reaction<->106173
phytozome	Sb01g010470	Sb01g010470	neighbouring_reaction_107961<->Reaction<->106174
phytozome	Sb01g010470	Sb01g019920	neighbouring_reaction_106174<->Reaction<->109361
phytozome	Sb01g010470	Sb01g019920	neighbouring_reaction_109361<->Reaction<->106174
phytozome	Sb01g010470	Sb01g019920	neighbouring_reaction_106174<->Reaction<->109361
phytozome	Sb01g010470	Sb01g019920	neighbouring_reaction_109361<->Reaction<->106174
phytozome	Sb01g010470	Sb01g048850	neighbouring_reaction_106174<->Reaction<->109361
phytozome	Sb01g010470	Sb01g048850	neighbouring_reaction_109361<->Reaction<->106174
phytozome	Sb01g010470	Sb01g049430	neighbouring_reaction_107875<->Reaction<->107961
phytozome	Sb01g010470	Sb01g049430	neighbouring_reaction_107961<->Reaction<->107875
phytozome	Sb01g010470	Sb03g036210	neighbouring_reaction_106174<->Reaction<->111444
phytozome	Sb01g010470	Sb03g036210	neighbouring_reaction_111444<->Reaction<->106174
phytozome	Sb01g010470	Sb06g031050	neighbouring_reaction_106173<->Reaction<->107876
phytozome	Sb01g010470	Sb06g031050	neighbouring_reaction_106174<->Reaction<->107961
phytozome	Sb01g010470	Sb06g031050	neighbouring_reaction_107876<->Reaction<->106173
phytozome	Sb01g010470	Sb06g031050	neighbouring_reaction_107961<->Reaction<->106174
phytozome	Sb01g010470	Sb08g016690	neighbouring_reaction_106174<->Reaction<->111444
phytozome	Sb01g010470	Sb08g016690	neighbouring_reaction_111444<->Reaction<->106174
phytozome	Sb01g010470	Sb08g016690	neighbouring_reaction_106174<->Reaction<->111444
phytozome	Sb01g010470	Sb08g016690	neighbouring_reaction_111444<->Reaction<->106174
phytozome	Sb01g010470	Sb08g023000	neighbouring_reaction_106174<->Reaction<->111444
phytozome	Sb01g010470	Sb08g023000	neighbouring_reaction_111444<->Reaction<->106174
phytozome	Sb01g010470	Sb08g023000	neighbouring_reaction_106174<->Reaction<->111444
phytozome	Sb01g010470	Sb08g023000	neighbouring_reaction_111444<->Reaction<->106174
phytozome	Sb01g010470	Sb09g030100	neighbouring_reaction_106174<->Reaction<->111444
phytozome	Sb01g010470	Sb09g030100	neighbouring_reaction_111444<->Reaction<->106174
phytozome	Sb01g011080	Sb01g015190	neighbouring_reaction_112026<->Reaction<->113097
phytozome	Sb01g011080	Sb01g015190	neighbouring_reaction_113097<->Reaction<->112026
phytozome	Sb01g011900	Sb03g035220	neighbouring_reaction_106581<->Reaction<->113136
phytozome	Sb01g011900	Sb03g035220	neighbouring_reaction_113136<->Reaction<->106581
phytozome	Sb01g012680	Sb03g031880	neighbouring_reaction_109248<->Reaction<->114098
phytozome	Sb01g012680	Sb03g031880	neighbouring_reaction_114098<->Reaction<->109248
phytozome	Sb01g012680	Sb09g027430	neighbouring_reaction_109248<->Reaction<->114098
phytozome	Sb01g012680	Sb09g027430	neighbouring_reaction_114098<->Reaction<->109248
phytozome	Sb01g012960	Sb01g034130	neighbouring_reaction_107947<->Reaction<->114044
phytozome	Sb01g012960	Sb01g034130	neighbouring_reaction_107947<->Reaction<->114048
phytozome	Sb01g012960	Sb01g034130	neighbouring_reaction_107947<->Reaction<->114103
phytozome	Sb01g012960	Sb01g034130	neighbouring_reaction_114044<->Reaction<->107947
phytozome	Sb01g012960	Sb01g034130	neighbouring_reaction_114048<->Reaction<->107947
phytozome	Sb01g012960	Sb01g034130	neighbouring_reaction_114103<->Reaction<->107947
phytozome	Sb01g012960	Sb01g042830	neighbouring_reaction_107947<->Reaction<->109232
phytozome	Sb01g012960	Sb01g042830	neighbouring_reaction_109232<->Reaction<->107947
phytozome	Sb01g012960	Sb03g011930	neighbouring_reaction_107947<->Reaction<->114270
phytozome	Sb01g012960	Sb03g011930	neighbouring_reaction_114270<->Reaction<->107947
phytozome	Sb01g012960	Sb03g013170	neighbouring_reaction_107947<->Reaction<->114270
phytozome	Sb01g012960	Sb03g013170	neighbouring_reaction_114270<->Reaction<->107947
phytozome	Sb01g012960	Sb03g013170	neighbouring_reaction_107947<->Reaction<->114270
phytozome	Sb01g012960	Sb03g013170	neighbouring_reaction_114270<->Reaction<->107947
phytozome	Sb01g012960	Sb04g029070	neighbouring_reaction_107947<->Reaction<->109232
phytozome	Sb01g012960	Sb04g029070	neighbouring_reaction_109232<->Reaction<->107947
phytozome	Sb01g012960	Sb05g014470	neighbouring_reaction_107947<->Reaction<->114743
phytozome	Sb01g012960	Sb05g014470	neighbouring_reaction_114743<->Reaction<->107947
phytozome	Sb01g012960	Sb05g014470	neighbouring_reaction_107947<->Reaction<->114743
phytozome	Sb01g012960	Sb05g014470	neighbouring_reaction_114743<->Reaction<->107947
phytozome	Sb01g012960	Sb09g002840	neighbouring_reaction_107947<->Reaction<->114270
phytozome	Sb01g012960	Sb09g002840	neighbouring_reaction_114270<->Reaction<->107947
phytozome	Sb01g012960	Sb10g005100	neighbouring_reaction_107947<->Reaction<->113135
phytozome	Sb01g012960	Sb10g005100	neighbouring_reaction_113135<->Reaction<->107947
phytozome	Sb01g012960	Sb01g034130	neighbouring_reaction_107947<->Reaction<->114044
phytozome	Sb01g012960	Sb01g034130	neighbouring_reaction_107947<->Reaction<->114048
phytozome	Sb01g012960	Sb01g034130	neighbouring_reaction_107947<->Reaction<->114103
phytozome	Sb01g012960	Sb01g034130	neighbouring_reaction_114044<->Reaction<->107947
phytozome	Sb01g012960	Sb01g034130	neighbouring_reaction_114048<->Reaction<->107947
phytozome	Sb01g012960	Sb01g034130	neighbouring_reaction_114103<->Reaction<->107947
phytozome	Sb01g012960	Sb01g042830	neighbouring_reaction_107947<->Reaction<->109232
phytozome	Sb01g012960	Sb01g042830	neighbouring_reaction_109232<->Reaction<->107947
phytozome	Sb01g012960	Sb03g011930	neighbouring_reaction_107947<->Reaction<->114270
phytozome	Sb01g012960	Sb03g011930	neighbouring_reaction_114270<->Reaction<->107947
phytozome	Sb01g012960	Sb03g013170	neighbouring_reaction_107947<->Reaction<->114270
phytozome	Sb01g012960	Sb03g013170	neighbouring_reaction_114270<->Reaction<->107947
phytozome	Sb01g012960	Sb03g013170	neighbouring_reaction_107947<->Reaction<->114270
phytozome	Sb01g012960	Sb03g013170	neighbouring_reaction_114270<->Reaction<->107947
phytozome	Sb01g012960	Sb04g029070	neighbouring_reaction_107947<->Reaction<->109232
phytozome	Sb01g012960	Sb04g029070	neighbouring_reaction_109232<->Reaction<->107947
phytozome	Sb01g012960	Sb05g014470	neighbouring_reaction_107947<->Reaction<->114743
phytozome	Sb01g012960	Sb05g014470	neighbouring_reaction_114743<->Reaction<->107947
phytozome	Sb01g012960	Sb05g014470	neighbouring_reaction_107947<->Reaction<->114743
phytozome	Sb01g012960	Sb05g014470	neighbouring_reaction_114743<->Reaction<->107947
phytozome	Sb01g012960	Sb09g002840	neighbouring_reaction_107947<->Reaction<->114270
phytozome	Sb01g012960	Sb09g002840	neighbouring_reaction_114270<->Reaction<->107947
phytozome	Sb01g012960	Sb10g005100	neighbouring_reaction_107947<->Reaction<->113135
phytozome	Sb01g012960	Sb10g005100	neighbouring_reaction_113135<->Reaction<->107947
phytozome	Sb01g012960	Sb01g034130	neighbouring_reaction_107947<->Reaction<->114044
phytozome	Sb01g012960	Sb01g034130	neighbouring_reaction_107947<->Reaction<->114048
phytozome	Sb01g012960	Sb01g034130	neighbouring_reaction_107947<->Reaction<->114103
phytozome	Sb01g012960	Sb01g034130	neighbouring_reaction_114044<->Reaction<->107947
phytozome	Sb01g012960	Sb01g034130	neighbouring_reaction_114048<->Reaction<->107947
phytozome	Sb01g012960	Sb01g034130	neighbouring_reaction_114103<->Reaction<->107947
phytozome	Sb01g012960	Sb01g042830	neighbouring_reaction_107947<->Reaction<->109232
phytozome	Sb01g012960	Sb01g042830	neighbouring_reaction_109232<->Reaction<->107947
phytozome	Sb01g012960	Sb03g011930	neighbouring_reaction_107947<->Reaction<->114270
phytozome	Sb01g012960	Sb03g011930	neighbouring_reaction_114270<->Reaction<->107947
phytozome	Sb01g012960	Sb03g013170	neighbouring_reaction_107947<->Reaction<->114270
phytozome	Sb01g012960	Sb03g013170	neighbouring_reaction_114270<->Reaction<->107947
phytozome	Sb01g012960	Sb03g013170	neighbouring_reaction_107947<->Reaction<->114270
phytozome	Sb01g012960	Sb03g013170	neighbouring_reaction_114270<->Reaction<->107947
phytozome	Sb01g012960	Sb04g029070	neighbouring_reaction_107947<->Reaction<->109232
phytozome	Sb01g012960	Sb04g029070	neighbouring_reaction_109232<->Reaction<->107947
phytozome	Sb01g012960	Sb05g014470	neighbouring_reaction_107947<->Reaction<->114743
phytozome	Sb01g012960	Sb05g014470	neighbouring_reaction_114743<->Reaction<->107947
phytozome	Sb01g012960	Sb05g014470	neighbouring_reaction_107947<->Reaction<->114743
phytozome	Sb01g012960	Sb05g014470	neighbouring_reaction_114743<->Reaction<->107947
phytozome	Sb01g012960	Sb09g002840	neighbouring_reaction_107947<->Reaction<->114270
phytozome	Sb01g012960	Sb09g002840	neighbouring_reaction_114270<->Reaction<->107947
phytozome	Sb01g012960	Sb10g005100	neighbouring_reaction_107947<->Reaction<->113135
phytozome	Sb01g012960	Sb10g005100	neighbouring_reaction_113135<->Reaction<->107947
phytozome	Sb01g013600	Sb03g039820	neighbouring_reaction_113193<->Reaction<->113258
phytozome	Sb01g013600	Sb03g039820	neighbouring_reaction_113258<->Reaction<->113193
phytozome	Sb01g013600	Sb03g039820	neighbouring_reaction_113193<->Reaction<->113258
phytozome	Sb01g013600	Sb03g039820	neighbouring_reaction_113258<->Reaction<->113193
phytozome	Sb01g013600	Sb04g030600	neighbouring_reaction_109748<->Reaction<->113258
phytozome	Sb01g013600	Sb04g030600	neighbouring_reaction_113258<->Reaction<->109748
phytozome	Sb01g013600	Sb06g000580	neighbouring_reaction_113043<->Reaction<->113258
phytozome	Sb01g013600	Sb06g000580	neighbouring_reaction_113258<->Reaction<->113043
phytozome	Sb01g013600	Sb09g022290	neighbouring_reaction_113193<->Reaction<->113258
phytozome	Sb01g013600	Sb09g022290	neighbouring_reaction_113258<->Reaction<->113193
phytozome	Sb01g013600	Sb09g022290	neighbouring_reaction_113193<->Reaction<->113258
phytozome	Sb01g013600	Sb09g022290	neighbouring_reaction_113258<->Reaction<->113193
phytozome	Sb01g013843	Sb01g010660	direct_complex_114552
phytozome	Sb01g013843	Sb01g010660	reaction_114553
phytozome	Sb01g013843	Sb01g013843	neighbouring_reaction_114523<->Reaction<->114549
phytozome	Sb01g013843	Sb01g013843	neighbouring_reaction_114549<->Reaction<->114523
phytozome	Sb01g013843	Sb01g029000	direct_complex_114546
phytozome	Sb01g013843	Sb01g029000	reaction_114547
phytozome	Sb01g013843	Sb02g002760	neighbouring_reaction_114523<->Reaction<->114549
phytozome	Sb01g013843	Sb02g002760	neighbouring_reaction_114549<->Reaction<->114523
phytozome	Sb01g013843	Sb04g026190	direct_complex_114554
phytozome	Sb01g013843	Sb04g026190	reaction_114555
phytozome	Sb01g013843	Sb06g024480	direct_complex_114546
phytozome	Sb01g013843	Sb06g024480	reaction_114547
phytozome	Sb01g014020	Sb02g010910	neighbouring_reaction_113291<->Reaction<->115118
phytozome	Sb01g014020	Sb02g010910	neighbouring_reaction_115118<->Reaction<->113291
phytozome	Sb01g014020	Sb03g038160	neighbouring_reaction_113291<->Reaction<->115118
phytozome	Sb01g014020	Sb03g038160	neighbouring_reaction_115118<->Reaction<->113291
phytozome	Sb01g014570	Sb09g002480	neighbouring_reaction_113734<->Reaction<->113737
phytozome	Sb01g014570	Sb09g002480	neighbouring_reaction_113735<->Reaction<->113736
phytozome	Sb01g014570	Sb09g002480	neighbouring_reaction_113736<->Reaction<->113735
phytozome	Sb01g014570	Sb09g002480	neighbouring_reaction_113737<->Reaction<->113734
phytozome	Sb01g014970	Sb02g030500	neighbouring_reaction_115460<->Reaction<->115602
phytozome	Sb01g014970	Sb02g030500	neighbouring_reaction_115602<->Reaction<->115460
phytozome	Sb01g014970	Sb03g047200	neighbouring_reaction_115602<->Reaction<->115647
phytozome	Sb01g014970	Sb03g047200	neighbouring_reaction_115647<->Reaction<->115602
phytozome	Sb01g015040	Sb01g015040	neighbouring_reaction_107966<->Reaction<->108002
phytozome	Sb01g015040	Sb01g015040	neighbouring_reaction_108002<->Reaction<->107966
phytozome	Sb01g015190	Sb04g002810	neighbouring_reaction_113097<->Reaction<->113113
phytozome	Sb01g015190	Sb04g002810	neighbouring_reaction_113113<->Reaction<->113097
phytozome	Sb01g015510	Sb0012s002210	neighbouring_reaction_106136<->Reaction<->106147
phytozome	Sb01g015510	Sb0012s002210	neighbouring_reaction_106147<->Reaction<->106136
phytozome	Sb01g015510	Sb01g044290	neighbouring_reaction_106136<->Reaction<->106147
phytozome	Sb01g015510	Sb01g044290	neighbouring_reaction_106147<->Reaction<->106136
phytozome	Sb01g015510	Sb01g044290	neighbouring_reaction_106136<->Reaction<->106147
phytozome	Sb01g015510	Sb01g044290	neighbouring_reaction_106147<->Reaction<->106136
phytozome	Sb01g015510	Sb01g044290	neighbouring_reaction_106136<->Reaction<->106147
phytozome	Sb01g015510	Sb01g044290	neighbouring_reaction_106147<->Reaction<->106136
phytozome	Sb01g015510	Sb06g014820	neighbouring_reaction_106134<->Reaction<->109883
phytozome	Sb01g015510	Sb06g014820	neighbouring_reaction_106136<->Reaction<->109883
phytozome	Sb01g015510	Sb06g014820	neighbouring_reaction_109883<->Reaction<->106134
phytozome	Sb01g015510	Sb06g014820	neighbouring_reaction_109883<->Reaction<->106136
phytozome	Sb01g015510	Sb06g014820	neighbouring_reaction_109883<->Reaction<->113711
phytozome	Sb01g015510	Sb06g014820	neighbouring_reaction_113711<->Reaction<->109883
phytozome	Sb01g015510	Sb10g026840	neighbouring_reaction_106134<->Reaction<->109883
phytozome	Sb01g015510	Sb10g026840	neighbouring_reaction_106136<->Reaction<->109883
phytozome	Sb01g015510	Sb10g026840	neighbouring_reaction_109883<->Reaction<->106134
phytozome	Sb01g015510	Sb10g026840	neighbouring_reaction_109883<->Reaction<->106136
phytozome	Sb01g015510	Sb10g026840	neighbouring_reaction_109883<->Reaction<->113711
phytozome	Sb01g015510	Sb10g026840	neighbouring_reaction_113711<->Reaction<->109883
phytozome	Sb01g016420	Sb02g010910	neighbouring_reaction_109392<->Reaction<->115118
phytozome	Sb01g016420	Sb02g010910	neighbouring_reaction_115118<->Reaction<->109392
phytozome	Sb01g016420	Sb03g038160	neighbouring_reaction_109392<->Reaction<->115118
phytozome	Sb01g016420	Sb03g038160	neighbouring_reaction_115118<->Reaction<->109392
phytozome	Sb01g016420	Sb10g004540	neighbouring_reaction_108875<->Reaction<->114792
phytozome	Sb01g016420	Sb10g004540	neighbouring_reaction_109042<->Reaction<->114792
phytozome	Sb01g016420	Sb10g004540	neighbouring_reaction_114792<->Reaction<->108875
phytozome	Sb01g016420	Sb10g004540	neighbouring_reaction_114792<->Reaction<->109042
phytozome	Sb01g018210	Sb01g027910	neighbouring_reaction_114413<->Reaction<->114967
phytozome	Sb01g018210	Sb01g027910	neighbouring_reaction_114967<->Reaction<->114413
phytozome	Sb01g018210	Sb01g027910	neighbouring_reaction_114413<->Reaction<->114967
phytozome	Sb01g018210	Sb01g027910	neighbouring_reaction_114967<->Reaction<->114413
phytozome	Sb01g018230	Sb09g016840	neighbouring_reaction_109930<->Reaction<->109934
phytozome	Sb01g018230	Sb09g016840	neighbouring_reaction_109934<->Reaction<->109930
phytozome	Sb01g019920	Sb03g036210	neighbouring_reaction_109361<->Reaction<->111444
phytozome	Sb01g019920	Sb03g036210	neighbouring_reaction_111444<->Reaction<->109361
phytozome	Sb01g019920	Sb08g016690	neighbouring_reaction_109361<->Reaction<->111444
phytozome	Sb01g019920	Sb08g016690	neighbouring_reaction_111444<->Reaction<->109361
phytozome	Sb01g019920	Sb08g016690	neighbouring_reaction_109361<->Reaction<->111444
phytozome	Sb01g019920	Sb08g016690	neighbouring_reaction_111444<->Reaction<->109361
phytozome	Sb01g019920	Sb08g023000	neighbouring_reaction_109361<->Reaction<->111444
phytozome	Sb01g019920	Sb08g023000	neighbouring_reaction_111444<->Reaction<->109361
phytozome	Sb01g019920	Sb08g023000	neighbouring_reaction_109361<->Reaction<->111444
phytozome	Sb01g019920	Sb08g023000	neighbouring_reaction_111444<->Reaction<->109361
phytozome	Sb01g019920	Sb09g030100	neighbouring_reaction_109361<->Reaction<->111444
phytozome	Sb01g019920	Sb09g030100	neighbouring_reaction_111444<->Reaction<->109361
phytozome	Sb01g019920	Sb03g036210	neighbouring_reaction_109361<->Reaction<->111444
phytozome	Sb01g019920	Sb03g036210	neighbouring_reaction_111444<->Reaction<->109361
phytozome	Sb01g019920	Sb08g016690	neighbouring_reaction_109361<->Reaction<->111444
phytozome	Sb01g019920	Sb08g016690	neighbouring_reaction_111444<->Reaction<->109361
phytozome	Sb01g019920	Sb08g016690	neighbouring_reaction_109361<->Reaction<->111444
phytozome	Sb01g019920	Sb08g016690	neighbouring_reaction_111444<->Reaction<->109361
phytozome	Sb01g019920	Sb08g023000	neighbouring_reaction_109361<->Reaction<->111444
phytozome	Sb01g019920	Sb08g023000	neighbouring_reaction_111444<->Reaction<->109361
phytozome	Sb01g019920	Sb08g023000	neighbouring_reaction_109361<->Reaction<->111444
phytozome	Sb01g019920	Sb08g023000	neighbouring_reaction_111444<->Reaction<->109361
phytozome	Sb01g019920	Sb09g030100	neighbouring_reaction_109361<->Reaction<->111444
phytozome	Sb01g019920	Sb09g030100	neighbouring_reaction_111444<->Reaction<->109361
phytozome	Sb01g020280	Sb10g006430	neighbouring_reaction_105632<->Reaction<->108374
phytozome	Sb01g020280	Sb10g006430	neighbouring_reaction_105633<->Reaction<->114235
phytozome	Sb01g020280	Sb10g006430	neighbouring_reaction_105634<->Reaction<->112575
phytozome	Sb01g020280	Sb10g006430	neighbouring_reaction_105635<->Reaction<->115071
phytozome	Sb01g020280	Sb10g006430	neighbouring_reaction_105636<->Reaction<->111132
phytozome	Sb01g020280	Sb10g006430	neighbouring_reaction_105702<->Reaction<->110759
phytozome	Sb01g020280	Sb10g006430	neighbouring_reaction_105703<->Reaction<->109690
phytozome	Sb01g020280	Sb10g006430	neighbouring_reaction_108374<->Reaction<->105632
phytozome	Sb01g020280	Sb10g006430	neighbouring_reaction_109690<->Reaction<->105703
phytozome	Sb01g020280	Sb10g006430	neighbouring_reaction_110759<->Reaction<->105702
phytozome	Sb01g020280	Sb10g006430	neighbouring_reaction_111132<->Reaction<->105636
phytozome	Sb01g020280	Sb10g006430	neighbouring_reaction_112575<->Reaction<->105634
phytozome	Sb01g020280	Sb10g006430	neighbouring_reaction_114235<->Reaction<->105633
phytozome	Sb01g020280	Sb10g006430	neighbouring_reaction_115071<->Reaction<->105635
phytozome	Sb01g020300	Sb10g006430	neighbouring_reaction_105632<->Reaction<->108374
phytozome	Sb01g020300	Sb10g006430	neighbouring_reaction_105633<->Reaction<->114235
phytozome	Sb01g020300	Sb10g006430	neighbouring_reaction_105634<->Reaction<->112575
phytozome	Sb01g020300	Sb10g006430	neighbouring_reaction_105635<->Reaction<->115071
phytozome	Sb01g020300	Sb10g006430	neighbouring_reaction_105636<->Reaction<->111132
phytozome	Sb01g020300	Sb10g006430	neighbouring_reaction_105702<->Reaction<->110759
phytozome	Sb01g020300	Sb10g006430	neighbouring_reaction_105703<->Reaction<->109690
phytozome	Sb01g020300	Sb10g006430	neighbouring_reaction_108374<->Reaction<->105632
phytozome	Sb01g020300	Sb10g006430	neighbouring_reaction_109690<->Reaction<->105703
phytozome	Sb01g020300	Sb10g006430	neighbouring_reaction_110759<->Reaction<->105702
phytozome	Sb01g020300	Sb10g006430	neighbouring_reaction_111132<->Reaction<->105636
phytozome	Sb01g020300	Sb10g006430	neighbouring_reaction_112575<->Reaction<->105634
phytozome	Sb01g020300	Sb10g006430	neighbouring_reaction_114235<->Reaction<->105633
phytozome	Sb01g020300	Sb10g006430	neighbouring_reaction_115071<->Reaction<->105635
phytozome	Sb01g020310	Sb10g006430	neighbouring_reaction_105632<->Reaction<->108374
phytozome	Sb01g020310	Sb10g006430	neighbouring_reaction_105633<->Reaction<->114235
phytozome	Sb01g020310	Sb10g006430	neighbouring_reaction_105634<->Reaction<->112575
phytozome	Sb01g020310	Sb10g006430	neighbouring_reaction_105635<->Reaction<->115071
phytozome	Sb01g020310	Sb10g006430	neighbouring_reaction_105636<->Reaction<->111132
phytozome	Sb01g020310	Sb10g006430	neighbouring_reaction_105702<->Reaction<->110759
phytozome	Sb01g020310	Sb10g006430	neighbouring_reaction_105703<->Reaction<->109690
phytozome	Sb01g020310	Sb10g006430	neighbouring_reaction_108374<->Reaction<->105632
phytozome	Sb01g020310	Sb10g006430	neighbouring_reaction_109690<->Reaction<->105703
phytozome	Sb01g020310	Sb10g006430	neighbouring_reaction_110759<->Reaction<->105702
phytozome	Sb01g020310	Sb10g006430	neighbouring_reaction_111132<->Reaction<->105636
phytozome	Sb01g020310	Sb10g006430	neighbouring_reaction_112575<->Reaction<->105634
phytozome	Sb01g020310	Sb10g006430	neighbouring_reaction_114235<->Reaction<->105633
phytozome	Sb01g020310	Sb10g006430	neighbouring_reaction_115071<->Reaction<->105635
phytozome	Sb01g021000	Sb03g041770	reaction_109450
phytozome	Sb01g021000	Sb09g020840	reaction_109450
phytozome	Sb01g021520	Sb01g018230	neighbouring_reaction_109926<->Reaction<->109930
phytozome	Sb01g021520	Sb01g018230	neighbouring_reaction_109930<->Reaction<->109926
phytozome	Sb01g021520	Sb09g016840	neighbouring_reaction_109926<->Reaction<->109934
phytozome	Sb01g021520	Sb09g016840	neighbouring_reaction_109934<->Reaction<->109926
phytozome	Sb01g021980	Sb03g029840	neighbouring_reaction_112815<->Reaction<->113834
phytozome	Sb01g021980	Sb03g029840	neighbouring_reaction_113834<->Reaction<->112815
phytozome	Sb01g021980	Sb06g022050	neighbouring_reaction_112815<->Reaction<->113834
phytozome	Sb01g021980	Sb06g022050	neighbouring_reaction_113834<->Reaction<->112815
phytozome	Sb01g021980	Sb09g029110	neighbouring_reaction_112815<->Reaction<->113834
phytozome	Sb01g021980	Sb09g029110	neighbouring_reaction_113834<->Reaction<->112815
phytozome	Sb01g021980	Sb09g029110	neighbouring_reaction_112815<->Reaction<->113834
phytozome	Sb01g021980	Sb09g029110	neighbouring_reaction_113834<->Reaction<->112815
phytozome	Sb01g023740	Sb01g036690	neighbouring_reaction_109351<->Reaction<->113018
phytozome	Sb01g023740	Sb01g036690	neighbouring_reaction_113018<->Reaction<->109351
phytozome	Sb01g023740	Sb01g036690	neighbouring_reaction_113018<->Reaction<->114043
phytozome	Sb01g023740	Sb01g036690	neighbouring_reaction_114043<->Reaction<->113018
phytozome	Sb01g023740	Sb03g011130	neighbouring_reaction_109351<->Reaction<->113018
phytozome	Sb01g023740	Sb03g011130	neighbouring_reaction_113018<->Reaction<->109351
phytozome	Sb01g023740	Sb03g011130	neighbouring_reaction_113018<->Reaction<->114043
phytozome	Sb01g023740	Sb03g011130	neighbouring_reaction_114043<->Reaction<->113018
phytozome	Sb01g023740	Sb04g028690	neighbouring_reaction_109167<->Reaction<->113018
phytozome	Sb01g023740	Sb04g028690	neighbouring_reaction_113018<->Reaction<->109167
phytozome	Sb01g023740	Sb04g028690	neighbouring_reaction_109167<->Reaction<->113018
phytozome	Sb01g023740	Sb04g028690	neighbouring_reaction_113018<->Reaction<->109167
phytozome	Sb01g023740	Sb04g028690	neighbouring_reaction_109167<->Reaction<->113018
phytozome	Sb01g023740	Sb04g028690	neighbouring_reaction_113018<->Reaction<->109167
phytozome	Sb01g023740	Sb06g032940	neighbouring_reaction_109351<->Reaction<->113018
phytozome	Sb01g023740	Sb06g032940	neighbouring_reaction_113018<->Reaction<->109351
phytozome	Sb01g023740	Sb06g032940	neighbouring_reaction_113018<->Reaction<->114043
phytozome	Sb01g023740	Sb06g032940	neighbouring_reaction_114043<->Reaction<->113018
phytozome	Sb01g023750	Sb01g036690	neighbouring_reaction_109351<->Reaction<->113018
phytozome	Sb01g023750	Sb01g036690	neighbouring_reaction_113018<->Reaction<->109351
phytozome	Sb01g023750	Sb01g036690	neighbouring_reaction_113018<->Reaction<->114043
phytozome	Sb01g023750	Sb01g036690	neighbouring_reaction_114043<->Reaction<->113018
phytozome	Sb01g023750	Sb03g011130	neighbouring_reaction_109351<->Reaction<->113018
phytozome	Sb01g023750	Sb03g011130	neighbouring_reaction_113018<->Reaction<->109351
phytozome	Sb01g023750	Sb03g011130	neighbouring_reaction_113018<->Reaction<->114043
phytozome	Sb01g023750	Sb03g011130	neighbouring_reaction_114043<->Reaction<->113018
phytozome	Sb01g023750	Sb04g028690	neighbouring_reaction_109167<->Reaction<->113018
phytozome	Sb01g023750	Sb04g028690	neighbouring_reaction_113018<->Reaction<->109167
phytozome	Sb01g023750	Sb04g028690	neighbouring_reaction_109167<->Reaction<->113018
phytozome	Sb01g023750	Sb04g028690	neighbouring_reaction_113018<->Reaction<->109167
phytozome	Sb01g023750	Sb04g028690	neighbouring_reaction_109167<->Reaction<->113018
phytozome	Sb01g023750	Sb04g028690	neighbouring_reaction_113018<->Reaction<->109167
phytozome	Sb01g023750	Sb06g032940	neighbouring_reaction_109351<->Reaction<->113018
phytozome	Sb01g023750	Sb06g032940	neighbouring_reaction_113018<->Reaction<->109351
phytozome	Sb01g023750	Sb06g032940	neighbouring_reaction_113018<->Reaction<->114043
phytozome	Sb01g023750	Sb06g032940	neighbouring_reaction_114043<->Reaction<->113018
phytozome	Sb01g023750	Sb01g036690	neighbouring_reaction_109351<->Reaction<->113018
phytozome	Sb01g023750	Sb01g036690	neighbouring_reaction_113018<->Reaction<->109351
phytozome	Sb01g023750	Sb01g036690	neighbouring_reaction_113018<->Reaction<->114043
phytozome	Sb01g023750	Sb01g036690	neighbouring_reaction_114043<->Reaction<->113018
phytozome	Sb01g023750	Sb03g011130	neighbouring_reaction_109351<->Reaction<->113018
phytozome	Sb01g023750	Sb03g011130	neighbouring_reaction_113018<->Reaction<->109351
phytozome	Sb01g023750	Sb03g011130	neighbouring_reaction_113018<->Reaction<->114043
phytozome	Sb01g023750	Sb03g011130	neighbouring_reaction_114043<->Reaction<->113018
phytozome	Sb01g023750	Sb04g028690	neighbouring_reaction_109167<->Reaction<->113018
phytozome	Sb01g023750	Sb04g028690	neighbouring_reaction_113018<->Reaction<->109167
phytozome	Sb01g023750	Sb04g028690	neighbouring_reaction_109167<->Reaction<->113018
phytozome	Sb01g023750	Sb04g028690	neighbouring_reaction_113018<->Reaction<->109167
phytozome	Sb01g023750	Sb04g028690	neighbouring_reaction_109167<->Reaction<->113018
phytozome	Sb01g023750	Sb04g028690	neighbouring_reaction_113018<->Reaction<->109167
phytozome	Sb01g023750	Sb06g032940	neighbouring_reaction_109351<->Reaction<->113018
phytozome	Sb01g023750	Sb06g032940	neighbouring_reaction_113018<->Reaction<->109351
phytozome	Sb01g023750	Sb06g032940	neighbouring_reaction_113018<->Reaction<->114043
phytozome	Sb01g023750	Sb06g032940	neighbouring_reaction_114043<->Reaction<->113018
phytozome	Sb01g023750	Sb01g036690	neighbouring_reaction_109351<->Reaction<->113018
phytozome	Sb01g023750	Sb01g036690	neighbouring_reaction_113018<->Reaction<->109351
phytozome	Sb01g023750	Sb01g036690	neighbouring_reaction_113018<->Reaction<->114043
phytozome	Sb01g023750	Sb01g036690	neighbouring_reaction_114043<->Reaction<->113018
phytozome	Sb01g023750	Sb03g011130	neighbouring_reaction_109351<->Reaction<->113018
phytozome	Sb01g023750	Sb03g011130	neighbouring_reaction_113018<->Reaction<->109351
phytozome	Sb01g023750	Sb03g011130	neighbouring_reaction_113018<->Reaction<->114043
phytozome	Sb01g023750	Sb03g011130	neighbouring_reaction_114043<->Reaction<->113018
phytozome	Sb01g023750	Sb04g028690	neighbouring_reaction_109167<->Reaction<->113018
phytozome	Sb01g023750	Sb04g028690	neighbouring_reaction_113018<->Reaction<->109167
phytozome	Sb01g023750	Sb04g028690	neighbouring_reaction_109167<->Reaction<->113018
phytozome	Sb01g023750	Sb04g028690	neighbouring_reaction_113018<->Reaction<->109167
phytozome	Sb01g023750	Sb04g028690	neighbouring_reaction_109167<->Reaction<->113018
phytozome	Sb01g023750	Sb04g028690	neighbouring_reaction_113018<->Reaction<->109167
phytozome	Sb01g023750	Sb06g032940	neighbouring_reaction_109351<->Reaction<->113018
phytozome	Sb01g023750	Sb06g032940	neighbouring_reaction_113018<->Reaction<->109351
phytozome	Sb01g023750	Sb06g032940	neighbouring_reaction_113018<->Reaction<->114043
phytozome	Sb01g023750	Sb06g032940	neighbouring_reaction_114043<->Reaction<->113018
phytozome	Sb01g023750	Sb01g036690	neighbouring_reaction_109351<->Reaction<->113018
phytozome	Sb01g023750	Sb01g036690	neighbouring_reaction_113018<->Reaction<->109351
phytozome	Sb01g023750	Sb01g036690	neighbouring_reaction_113018<->Reaction<->114043
phytozome	Sb01g023750	Sb01g036690	neighbouring_reaction_114043<->Reaction<->113018
phytozome	Sb01g023750	Sb03g011130	neighbouring_reaction_109351<->Reaction<->113018
phytozome	Sb01g023750	Sb03g011130	neighbouring_reaction_113018<->Reaction<->109351
phytozome	Sb01g023750	Sb03g011130	neighbouring_reaction_113018<->Reaction<->114043
phytozome	Sb01g023750	Sb03g011130	neighbouring_reaction_114043<->Reaction<->113018
phytozome	Sb01g023750	Sb04g028690	neighbouring_reaction_109167<->Reaction<->113018
phytozome	Sb01g023750	Sb04g028690	neighbouring_reaction_113018<->Reaction<->109167
phytozome	Sb01g023750	Sb04g028690	neighbouring_reaction_109167<->Reaction<->113018
phytozome	Sb01g023750	Sb04g028690	neighbouring_reaction_113018<->Reaction<->109167
phytozome	Sb01g023750	Sb04g028690	neighbouring_reaction_109167<->Reaction<->113018
phytozome	Sb01g023750	Sb04g028690	neighbouring_reaction_113018<->Reaction<->109167
phytozome	Sb01g023750	Sb06g032940	neighbouring_reaction_109351<->Reaction<->113018
phytozome	Sb01g023750	Sb06g032940	neighbouring_reaction_113018<->Reaction<->109351
phytozome	Sb01g023750	Sb06g032940	neighbouring_reaction_113018<->Reaction<->114043
phytozome	Sb01g023750	Sb06g032940	neighbouring_reaction_114043<->Reaction<->113018
phytozome	Sb01g023750	Sb01g036690	neighbouring_reaction_109351<->Reaction<->113018
phytozome	Sb01g023750	Sb01g036690	neighbouring_reaction_113018<->Reaction<->109351
phytozome	Sb01g023750	Sb01g036690	neighbouring_reaction_113018<->Reaction<->114043
phytozome	Sb01g023750	Sb01g036690	neighbouring_reaction_114043<->Reaction<->113018
phytozome	Sb01g023750	Sb03g011130	neighbouring_reaction_109351<->Reaction<->113018
phytozome	Sb01g023750	Sb03g011130	neighbouring_reaction_113018<->Reaction<->109351
phytozome	Sb01g023750	Sb03g011130	neighbouring_reaction_113018<->Reaction<->114043
phytozome	Sb01g023750	Sb03g011130	neighbouring_reaction_114043<->Reaction<->113018
phytozome	Sb01g023750	Sb04g028690	neighbouring_reaction_109167<->Reaction<->113018
phytozome	Sb01g023750	Sb04g028690	neighbouring_reaction_113018<->Reaction<->109167
phytozome	Sb01g023750	Sb04g028690	neighbouring_reaction_109167<->Reaction<->113018
phytozome	Sb01g023750	Sb04g028690	neighbouring_reaction_113018<->Reaction<->109167
phytozome	Sb01g023750	Sb04g028690	neighbouring_reaction_109167<->Reaction<->113018
phytozome	Sb01g023750	Sb04g028690	neighbouring_reaction_113018<->Reaction<->109167
phytozome	Sb01g023750	Sb06g032940	neighbouring_reaction_109351<->Reaction<->113018
phytozome	Sb01g023750	Sb06g032940	neighbouring_reaction_113018<->Reaction<->109351
phytozome	Sb01g023750	Sb06g032940	neighbouring_reaction_113018<->Reaction<->114043
phytozome	Sb01g023750	Sb06g032940	neighbouring_reaction_114043<->Reaction<->113018
phytozome	Sb01g027540	Sb03g005340	neighbouring_reaction_106027<->Reaction<->114952
phytozome	Sb01g027540	Sb03g005340	neighbouring_reaction_106028<->Reaction<->114952
phytozome	Sb01g027540	Sb03g005340	neighbouring_reaction_114952<->Reaction<->106027
phytozome	Sb01g027540	Sb03g005340	neighbouring_reaction_114952<->Reaction<->106028
phytozome	Sb01g027540	Sb04g005960	neighbouring_reaction_106027<->Reaction<->114952
phytozome	Sb01g027540	Sb04g005960	neighbouring_reaction_106028<->Reaction<->114952
phytozome	Sb01g027540	Sb04g005960	neighbouring_reaction_114952<->Reaction<->106027
phytozome	Sb01g027540	Sb04g005960	neighbouring_reaction_114952<->Reaction<->106028
phytozome	Sb01g027540	Sb10g009990	neighbouring_reaction_106027<->Reaction<->114952
phytozome	Sb01g027540	Sb10g009990	neighbouring_reaction_106028<->Reaction<->114952
phytozome	Sb01g027540	Sb10g009990	neighbouring_reaction_114952<->Reaction<->106027
phytozome	Sb01g027540	Sb10g009990	neighbouring_reaction_114952<->Reaction<->106028
phytozome	Sb01g027570	Sb03g005340	neighbouring_reaction_106027<->Reaction<->114952
phytozome	Sb01g027570	Sb03g005340	neighbouring_reaction_106028<->Reaction<->114952
phytozome	Sb01g027570	Sb03g005340	neighbouring_reaction_114952<->Reaction<->106027
phytozome	Sb01g027570	Sb03g005340	neighbouring_reaction_114952<->Reaction<->106028
phytozome	Sb01g027570	Sb04g005960	neighbouring_reaction_106027<->Reaction<->114952
phytozome	Sb01g027570	Sb04g005960	neighbouring_reaction_106028<->Reaction<->114952
phytozome	Sb01g027570	Sb04g005960	neighbouring_reaction_114952<->Reaction<->106027
phytozome	Sb01g027570	Sb04g005960	neighbouring_reaction_114952<->Reaction<->106028
phytozome	Sb01g027570	Sb10g009990	neighbouring_reaction_106027<->Reaction<->114952
phytozome	Sb01g027570	Sb10g009990	neighbouring_reaction_106028<->Reaction<->114952
phytozome	Sb01g027570	Sb10g009990	neighbouring_reaction_114952<->Reaction<->106027
phytozome	Sb01g027570	Sb10g009990	neighbouring_reaction_114952<->Reaction<->106028
phytozome	Sb01g027570	Sb03g005340	neighbouring_reaction_106027<->Reaction<->114952
phytozome	Sb01g027570	Sb03g005340	neighbouring_reaction_106028<->Reaction<->114952
phytozome	Sb01g027570	Sb03g005340	neighbouring_reaction_114952<->Reaction<->106027
phytozome	Sb01g027570	Sb03g005340	neighbouring_reaction_114952<->Reaction<->106028
phytozome	Sb01g027570	Sb04g005960	neighbouring_reaction_106027<->Reaction<->114952
phytozome	Sb01g027570	Sb04g005960	neighbouring_reaction_106028<->Reaction<->114952
phytozome	Sb01g027570	Sb04g005960	neighbouring_reaction_114952<->Reaction<->106027
phytozome	Sb01g027570	Sb04g005960	neighbouring_reaction_114952<->Reaction<->106028
phytozome	Sb01g027570	Sb10g009990	neighbouring_reaction_106027<->Reaction<->114952
phytozome	Sb01g027570	Sb10g009990	neighbouring_reaction_106028<->Reaction<->114952
phytozome	Sb01g027570	Sb10g009990	neighbouring_reaction_114952<->Reaction<->106027
phytozome	Sb01g027570	Sb10g009990	neighbouring_reaction_114952<->Reaction<->106028
phytozome	Sb01g027790	Sb10g003690	neighbouring_reaction_114782<->Reaction<->115408
phytozome	Sb01g027790	Sb10g003690	neighbouring_reaction_115408<->Reaction<->114782
phytozome	Sb01g027790	Sb10g003690	neighbouring_reaction_114782<->Reaction<->115408
phytozome	Sb01g027790	Sb10g003690	neighbouring_reaction_115408<->Reaction<->114782
phytozome	Sb01g027860	Sb04g033080	neighbouring_reaction_105619<->Reaction<->105623
phytozome	Sb01g027860	Sb04g033080	neighbouring_reaction_105623<->Reaction<->105619
phytozome	Sb01g027860	Sb04g033080	neighbouring_reaction_105619<->Reaction<->105623
phytozome	Sb01g027860	Sb04g033080	neighbouring_reaction_105623<->Reaction<->105619
phytozome	Sb01g027910	Sb03g047310	neighbouring_reaction_114967<->Reaction<->114973
phytozome	Sb01g027910	Sb03g047310	neighbouring_reaction_114973<->Reaction<->114967
phytozome	Sb01g028560	Sb01g010240	neighbouring_reaction_111186<->Reaction<->111186
phytozome	Sb01g028560	Sb01g010240	neighbouring_reaction_111186<->Reaction<->111194
phytozome	Sb01g028560	Sb01g010240	neighbouring_reaction_111186<->Reaction<->111195
phytozome	Sb01g028560	Sb01g010240	neighbouring_reaction_111186<->Reaction<->111203
phytozome	Sb01g028560	Sb01g010240	neighbouring_reaction_111194<->Reaction<->111186
phytozome	Sb01g028560	Sb01g010240	neighbouring_reaction_111195<->Reaction<->111186
phytozome	Sb01g028560	Sb01g010240	neighbouring_reaction_111203<->Reaction<->111186
phytozome	Sb01g028560	Sb01g028560	neighbouring_reaction_111186<->Reaction<->111186
phytozome	Sb01g028560	Sb01g028560	neighbouring_reaction_111186<->Reaction<->111194
phytozome	Sb01g028560	Sb01g028560	neighbouring_reaction_111186<->Reaction<->111195
phytozome	Sb01g028560	Sb01g028560	neighbouring_reaction_111186<->Reaction<->111203
phytozome	Sb01g028560	Sb01g028560	neighbouring_reaction_111194<->Reaction<->111186
phytozome	Sb01g028560	Sb01g028560	neighbouring_reaction_111195<->Reaction<->111186
phytozome	Sb01g028560	Sb01g028560	neighbouring_reaction_111203<->Reaction<->111186
phytozome	Sb01g028700	Sb01g042750	neighbouring_reaction_113546<->Reaction<->115007
phytozome	Sb01g028700	Sb01g042750	neighbouring_reaction_115007<->Reaction<->113546
phytozome	Sb01g028700	Sb06g027550	neighbouring_reaction_113400<->Reaction<->113559
phytozome	Sb01g028700	Sb06g027550	neighbouring_reaction_113559<->Reaction<->113400
phytozome	Sb01g029750	Sb03g001200	neighbouring_reaction_107847<->Reaction<->113379
phytozome	Sb01g029750	Sb03g001200	neighbouring_reaction_113379<->Reaction<->107847
phytozome	Sb01g029750	Sb03g007890	neighbouring_reaction_109210<->Reaction<->113226
phytozome	Sb01g029750	Sb03g007890	neighbouring_reaction_113226<->Reaction<->109210
phytozome	Sb01g029750	Sb04g034870	neighbouring_reaction_109206<->Reaction<->113224
phytozome	Sb01g029750	Sb04g034870	neighbouring_reaction_113224<->Reaction<->109206
phytozome	Sb01g029750	Sb10g008310	neighbouring_reaction_109262<->Reaction<->113379
phytozome	Sb01g029750	Sb10g008310	neighbouring_reaction_113379<->Reaction<->109262
phytozome	Sb01g029750	Sb10g008310	neighbouring_reaction_109262<->Reaction<->113379
phytozome	Sb01g029750	Sb10g008310	neighbouring_reaction_113379<->Reaction<->109262
phytozome	Sb01g029750	Sb10g008310	neighbouring_reaction_109262<->Reaction<->113379
phytozome	Sb01g029750	Sb10g008310	neighbouring_reaction_113379<->Reaction<->109262
phytozome	Sb01g029750	Sb03g001200	neighbouring_reaction_107847<->Reaction<->113379
phytozome	Sb01g029750	Sb03g001200	neighbouring_reaction_113379<->Reaction<->107847
phytozome	Sb01g029750	Sb03g007890	neighbouring_reaction_109210<->Reaction<->113226
phytozome	Sb01g029750	Sb03g007890	neighbouring_reaction_113226<->Reaction<->109210
phytozome	Sb01g029750	Sb04g034870	neighbouring_reaction_109206<->Reaction<->113224
phytozome	Sb01g029750	Sb04g034870	neighbouring_reaction_113224<->Reaction<->109206
phytozome	Sb01g029750	Sb10g008310	neighbouring_reaction_109262<->Reaction<->113379
phytozome	Sb01g029750	Sb10g008310	neighbouring_reaction_113379<->Reaction<->109262
phytozome	Sb01g029750	Sb10g008310	neighbouring_reaction_109262<->Reaction<->113379
phytozome	Sb01g029750	Sb10g008310	neighbouring_reaction_113379<->Reaction<->109262
phytozome	Sb01g029750	Sb10g008310	neighbouring_reaction_109262<->Reaction<->113379
phytozome	Sb01g029750	Sb10g008310	neighbouring_reaction_113379<->Reaction<->109262
phytozome	Sb01g029750	Sb03g001200	neighbouring_reaction_107847<->Reaction<->113379
phytozome	Sb01g029750	Sb03g001200	neighbouring_reaction_113379<->Reaction<->107847
phytozome	Sb01g029750	Sb03g007890	neighbouring_reaction_109210<->Reaction<->113226
phytozome	Sb01g029750	Sb03g007890	neighbouring_reaction_113226<->Reaction<->109210
phytozome	Sb01g029750	Sb04g034870	neighbouring_reaction_109206<->Reaction<->113224
phytozome	Sb01g029750	Sb04g034870	neighbouring_reaction_113224<->Reaction<->109206
phytozome	Sb01g029750	Sb10g008310	neighbouring_reaction_109262<->Reaction<->113379
phytozome	Sb01g029750	Sb10g008310	neighbouring_reaction_113379<->Reaction<->109262
phytozome	Sb01g029750	Sb10g008310	neighbouring_reaction_109262<->Reaction<->113379
phytozome	Sb01g029750	Sb10g008310	neighbouring_reaction_113379<->Reaction<->109262
phytozome	Sb01g029750	Sb10g008310	neighbouring_reaction_109262<->Reaction<->113379
phytozome	Sb01g029750	Sb10g008310	neighbouring_reaction_113379<->Reaction<->109262
phytozome	Sb01g031100	Sb01g018210	neighbouring_reaction_114413<->Reaction<->114431
phytozome	Sb01g031100	Sb01g018210	neighbouring_reaction_114413<->Reaction<->114432
phytozome	Sb01g031100	Sb01g018210	neighbouring_reaction_114431<->Reaction<->114413
phytozome	Sb01g031100	Sb01g018210	neighbouring_reaction_114432<->Reaction<->114413
phytozome	Sb01g031100	Sb01g018210	neighbouring_reaction_114413<->Reaction<->114431
phytozome	Sb01g031100	Sb01g018210	neighbouring_reaction_114413<->Reaction<->114432
phytozome	Sb01g031100	Sb01g018210	neighbouring_reaction_114431<->Reaction<->114413
phytozome	Sb01g031100	Sb01g018210	neighbouring_reaction_114432<->Reaction<->114413
phytozome	Sb01g031300	Sb09g002470	neighbouring_reaction_108898<->Reaction<->109158
phytozome	Sb01g031300	Sb09g002470	neighbouring_reaction_109158<->Reaction<->108898
phytozome	Sb01g031520	Sb03g040810	neighbouring_reaction_115743<->Reaction<->115806
phytozome	Sb01g031520	Sb03g040810	neighbouring_reaction_115743<->Reaction<->115807
phytozome	Sb01g031520	Sb03g040810	neighbouring_reaction_115806<->Reaction<->115743
phytozome	Sb01g031520	Sb03g040810	neighbouring_reaction_115807<->Reaction<->115743
phytozome	Sb01g031520	Sb03g040810	neighbouring_reaction_115743<->Reaction<->115806
phytozome	Sb01g031520	Sb03g040810	neighbouring_reaction_115743<->Reaction<->115807
phytozome	Sb01g031520	Sb03g040810	neighbouring_reaction_115806<->Reaction<->115743
phytozome	Sb01g031520	Sb03g040810	neighbouring_reaction_115807<->Reaction<->115743
phytozome	Sb01g031520	Sb03g040810	neighbouring_reaction_115743<->Reaction<->115806
phytozome	Sb01g031520	Sb03g040810	neighbouring_reaction_115743<->Reaction<->115807
phytozome	Sb01g031520	Sb03g040810	neighbouring_reaction_115806<->Reaction<->115743
phytozome	Sb01g031520	Sb03g040810	neighbouring_reaction_115807<->Reaction<->115743
phytozome	Sb01g031520	Sb03g040810	neighbouring_reaction_115743<->Reaction<->115806
phytozome	Sb01g031520	Sb03g040810	neighbouring_reaction_115743<->Reaction<->115807
phytozome	Sb01g031520	Sb03g040810	neighbouring_reaction_115806<->Reaction<->115743
phytozome	Sb01g031520	Sb03g040810	neighbouring_reaction_115807<->Reaction<->115743
phytozome	Sb01g031660	Sb01g036690	neighbouring_reaction_109342<->Reaction<->109351
phytozome	Sb01g031660	Sb01g036690	neighbouring_reaction_109342<->Reaction<->114043
phytozome	Sb01g031660	Sb01g036690	neighbouring_reaction_109351<->Reaction<->109342
phytozome	Sb01g031660	Sb01g036690	neighbouring_reaction_114043<->Reaction<->109342
phytozome	Sb01g031660	Sb02g021090	neighbouring_reaction_109342<->Reaction<->114269
phytozome	Sb01g031660	Sb02g021090	neighbouring_reaction_114269<->Reaction<->109342
phytozome	Sb01g031660	Sb03g011130	neighbouring_reaction_109342<->Reaction<->109351
phytozome	Sb01g031660	Sb03g011130	neighbouring_reaction_109342<->Reaction<->114043
phytozome	Sb01g031660	Sb03g011130	neighbouring_reaction_109351<->Reaction<->109342
phytozome	Sb01g031660	Sb03g011130	neighbouring_reaction_114043<->Reaction<->109342
phytozome	Sb01g031660	Sb03g035090	neighbouring_reaction_109342<->Reaction<->114269
phytozome	Sb01g031660	Sb03g035090	neighbouring_reaction_114269<->Reaction<->109342
phytozome	Sb01g031660	Sb04g008720	neighbouring_reaction_109342<->Reaction<->114269
phytozome	Sb01g031660	Sb04g008720	neighbouring_reaction_114269<->Reaction<->109342
phytozome	Sb01g031660	Sb06g032940	neighbouring_reaction_109342<->Reaction<->109351
phytozome	Sb01g031660	Sb06g032940	neighbouring_reaction_109342<->Reaction<->114043
phytozome	Sb01g031660	Sb06g032940	neighbouring_reaction_109351<->Reaction<->109342
phytozome	Sb01g031660	Sb06g032940	neighbouring_reaction_114043<->Reaction<->109342
phytozome	Sb01g031660	Sb07g014960	neighbouring_reaction_109342<->Reaction<->114269
phytozome	Sb01g031660	Sb07g014960	neighbouring_reaction_114269<->Reaction<->109342
phytozome	Sb01g031660	Sb10g021330	neighbouring_reaction_109342<->Reaction<->114269
phytozome	Sb01g031660	Sb10g021330	neighbouring_reaction_114269<->Reaction<->109342
phytozome	Sb01g032250	Sb01g018210	neighbouring_reaction_108835<->Reaction<->114413
phytozome	Sb01g032250	Sb01g018210	neighbouring_reaction_114413<->Reaction<->108835
phytozome	Sb01g032250	Sb01g018210	neighbouring_reaction_108835<->Reaction<->114413
phytozome	Sb01g032250	Sb01g018210	neighbouring_reaction_114413<->Reaction<->108835
phytozome	Sb01g032250	Sb02g021100	neighbouring_reaction_108835<->Reaction<->110428
phytozome	Sb01g032250	Sb02g021100	neighbouring_reaction_110428<->Reaction<->108835
phytozome	Sb01g032250	Sb03g006220	neighbouring_reaction_108835<->Reaction<->110428
phytozome	Sb01g032250	Sb03g006220	neighbouring_reaction_110428<->Reaction<->108835
phytozome	Sb01g032250	Sb03g006220	neighbouring_reaction_108835<->Reaction<->110428
phytozome	Sb01g032250	Sb03g006220	neighbouring_reaction_110428<->Reaction<->108835
phytozome	Sb01g032250	Sb03g006220	neighbouring_reaction_108835<->Reaction<->110428
phytozome	Sb01g032250	Sb03g006220	neighbouring_reaction_110428<->Reaction<->108835
phytozome	Sb01g032250	Sb03g035100	neighbouring_reaction_108835<->Reaction<->110428
phytozome	Sb01g032250	Sb03g035100	neighbouring_reaction_110428<->Reaction<->108835
phytozome	Sb01g032260	Sb03g011110	neighbouring_reaction_107874<->Reaction<->114484
phytozome	Sb01g032260	Sb03g011110	neighbouring_reaction_114484<->Reaction<->107874
phytozome	Sb01g032260	Sb08g020870	neighbouring_reaction_107874<->Reaction<->114484
phytozome	Sb01g032260	Sb08g020870	neighbouring_reaction_114484<->Reaction<->107874
phytozome	Sb01g032360	Sb01g032360	neighbouring_reaction_109846<->Reaction<->109889
phytozome	Sb01g032360	Sb01g032360	neighbouring_reaction_109846<->Reaction<->111131
phytozome	Sb01g032360	Sb01g032360	neighbouring_reaction_109847<->Reaction<->109887
phytozome	Sb01g032360	Sb01g032360	neighbouring_reaction_109847<->Reaction<->114032
phytozome	Sb01g032360	Sb01g032360	neighbouring_reaction_109887<->Reaction<->109847
phytozome	Sb01g032360	Sb01g032360	neighbouring_reaction_109887<->Reaction<->113594
phytozome	Sb01g032360	Sb01g032360	neighbouring_reaction_109887<->Reaction<->113595
phytozome	Sb01g032360	Sb01g032360	neighbouring_reaction_109889<->Reaction<->109846
phytozome	Sb01g032360	Sb01g032360	neighbouring_reaction_109889<->Reaction<->113594
phytozome	Sb01g032360	Sb01g032360	neighbouring_reaction_109889<->Reaction<->113595
phytozome	Sb01g032360	Sb01g032360	neighbouring_reaction_111131<->Reaction<->109846
phytozome	Sb01g032360	Sb01g032360	neighbouring_reaction_113594<->Reaction<->109887
phytozome	Sb01g032360	Sb01g032360	neighbouring_reaction_113594<->Reaction<->109889
phytozome	Sb01g032360	Sb01g032360	neighbouring_reaction_113595<->Reaction<->109887
phytozome	Sb01g032360	Sb01g032360	neighbouring_reaction_113595<->Reaction<->109889
phytozome	Sb01g032360	Sb01g032360	neighbouring_reaction_114032<->Reaction<->109847
phytozome	Sb01g032360	Sb02g043990	neighbouring_reaction_109846<->Reaction<->111835
phytozome	Sb01g032360	Sb02g043990	neighbouring_reaction_111835<->Reaction<->109846
phytozome	Sb01g032360	Sb03g002410	neighbouring_reaction_109846<->Reaction<->111835
phytozome	Sb01g032360	Sb03g002410	neighbouring_reaction_111835<->Reaction<->109846
phytozome	Sb01g032360	Sb03g024490	indirect_complex_109839
phytozome	Sb01g032360	Sb03g024490	indirect_complex_109888
phytozome	Sb01g032360	Sb03g024490	neighbouring_reaction_109846<->Reaction<->109889
phytozome	Sb01g032360	Sb03g024490	neighbouring_reaction_109846<->Reaction<->111131
phytozome	Sb01g032360	Sb03g024490	neighbouring_reaction_109846<->Reaction<->111835
phytozome	Sb01g032360	Sb03g024490	neighbouring_reaction_109887<->Reaction<->113594
phytozome	Sb01g032360	Sb03g024490	neighbouring_reaction_109887<->Reaction<->113595
phytozome	Sb01g032360	Sb03g024490	neighbouring_reaction_109889<->Reaction<->109846
phytozome	Sb01g032360	Sb03g024490	neighbouring_reaction_109889<->Reaction<->113594
phytozome	Sb01g032360	Sb03g024490	neighbouring_reaction_109889<->Reaction<->113595
phytozome	Sb01g032360	Sb03g024490	neighbouring_reaction_111131<->Reaction<->109846
phytozome	Sb01g032360	Sb03g024490	neighbouring_reaction_111835<->Reaction<->109846
phytozome	Sb01g032360	Sb03g024490	neighbouring_reaction_113594<->Reaction<->109887
phytozome	Sb01g032360	Sb03g024490	neighbouring_reaction_113594<->Reaction<->109889
phytozome	Sb01g032360	Sb03g024490	neighbouring_reaction_113595<->Reaction<->109887
phytozome	Sb01g032360	Sb03g024490	neighbouring_reaction_113595<->Reaction<->109889
phytozome	Sb01g032360	Sb03g024490	reaction_113594
phytozome	Sb01g032360	Sb04g036050	indirect_complex_109839
phytozome	Sb01g032360	Sb04g036050	indirect_complex_109888
phytozome	Sb01g032360	Sb04g036050	neighbouring_reaction_109846<->Reaction<->109889
phytozome	Sb01g032360	Sb04g036050	neighbouring_reaction_109846<->Reaction<->111131
phytozome	Sb01g032360	Sb04g036050	neighbouring_reaction_109846<->Reaction<->111835
phytozome	Sb01g032360	Sb04g036050	neighbouring_reaction_109887<->Reaction<->113594
phytozome	Sb01g032360	Sb04g036050	neighbouring_reaction_109887<->Reaction<->113595
phytozome	Sb01g032360	Sb04g036050	neighbouring_reaction_109889<->Reaction<->109846
phytozome	Sb01g032360	Sb04g036050	neighbouring_reaction_109889<->Reaction<->113594
phytozome	Sb01g032360	Sb04g036050	neighbouring_reaction_109889<->Reaction<->113595
phytozome	Sb01g032360	Sb04g036050	neighbouring_reaction_111131<->Reaction<->109846
phytozome	Sb01g032360	Sb04g036050	neighbouring_reaction_111835<->Reaction<->109846
phytozome	Sb01g032360	Sb04g036050	neighbouring_reaction_113594<->Reaction<->109887
phytozome	Sb01g032360	Sb04g036050	neighbouring_reaction_113594<->Reaction<->109889
phytozome	Sb01g032360	Sb04g036050	neighbouring_reaction_113595<->Reaction<->109887
phytozome	Sb01g032360	Sb04g036050	neighbouring_reaction_113595<->Reaction<->109889
phytozome	Sb01g032360	Sb04g036050	reaction_113594
phytozome	Sb01g032360	Sb06g017330	indirect_complex_109839
phytozome	Sb01g032360	Sb06g017330	indirect_complex_109888
phytozome	Sb01g032360	Sb06g017330	neighbouring_reaction_109846<->Reaction<->109889
phytozome	Sb01g032360	Sb06g017330	neighbouring_reaction_109846<->Reaction<->111131
phytozome	Sb01g032360	Sb06g017330	neighbouring_reaction_109846<->Reaction<->111835
phytozome	Sb01g032360	Sb06g017330	neighbouring_reaction_109887<->Reaction<->113594
phytozome	Sb01g032360	Sb06g017330	neighbouring_reaction_109887<->Reaction<->113595
phytozome	Sb01g032360	Sb06g017330	neighbouring_reaction_109889<->Reaction<->109846
phytozome	Sb01g032360	Sb06g017330	neighbouring_reaction_109889<->Reaction<->113594
phytozome	Sb01g032360	Sb06g017330	neighbouring_reaction_109889<->Reaction<->113595
phytozome	Sb01g032360	Sb06g017330	neighbouring_reaction_111131<->Reaction<->109846
phytozome	Sb01g032360	Sb06g017330	neighbouring_reaction_111835<->Reaction<->109846
phytozome	Sb01g032360	Sb06g017330	neighbouring_reaction_113594<->Reaction<->109887
phytozome	Sb01g032360	Sb06g017330	neighbouring_reaction_113594<->Reaction<->109889
phytozome	Sb01g032360	Sb06g017330	neighbouring_reaction_113595<->Reaction<->109887
phytozome	Sb01g032360	Sb06g017330	neighbouring_reaction_113595<->Reaction<->109889
phytozome	Sb01g032360	Sb06g017330	reaction_113594
phytozome	Sb01g032360	Sb06g033210	neighbouring_reaction_109846<->Reaction<->111835
phytozome	Sb01g032360	Sb06g033210	neighbouring_reaction_111835<->Reaction<->109846
phytozome	Sb01g032360	Sb06g033210	neighbouring_reaction_109846<->Reaction<->111835
phytozome	Sb01g032360	Sb06g033210	neighbouring_reaction_111835<->Reaction<->109846
phytozome	Sb01g032360	Sb07g022680	neighbouring_reaction_111129<->Reaction<->111131
phytozome	Sb01g032360	Sb07g022680	neighbouring_reaction_111131<->Reaction<->111129
phytozome	Sb01g032360	Sb08g018160	indirect_complex_109839
phytozome	Sb01g032360	Sb08g018160	indirect_complex_109888
phytozome	Sb01g032360	Sb08g018160	neighbouring_reaction_109846<->Reaction<->109889
phytozome	Sb01g032360	Sb08g018160	neighbouring_reaction_109846<->Reaction<->111131
phytozome	Sb01g032360	Sb08g018160	neighbouring_reaction_109846<->Reaction<->111835
phytozome	Sb01g032360	Sb08g018160	neighbouring_reaction_109887<->Reaction<->113594
phytozome	Sb01g032360	Sb08g018160	neighbouring_reaction_109887<->Reaction<->113595
phytozome	Sb01g032360	Sb08g018160	neighbouring_reaction_109889<->Reaction<->109846
phytozome	Sb01g032360	Sb08g018160	neighbouring_reaction_109889<->Reaction<->113594
phytozome	Sb01g032360	Sb08g018160	neighbouring_reaction_109889<->Reaction<->113595
phytozome	Sb01g032360	Sb08g018160	neighbouring_reaction_111131<->Reaction<->109846
phytozome	Sb01g032360	Sb08g018160	neighbouring_reaction_111835<->Reaction<->109846
phytozome	Sb01g032360	Sb08g018160	neighbouring_reaction_113594<->Reaction<->109887
phytozome	Sb01g032360	Sb08g018160	neighbouring_reaction_113594<->Reaction<->109889
phytozome	Sb01g032360	Sb08g018160	neighbouring_reaction_113595<->Reaction<->109887
phytozome	Sb01g032360	Sb08g018160	neighbouring_reaction_113595<->Reaction<->109889
phytozome	Sb01g032360	Sb08g018160	reaction_113594
phytozome	Sb01g032360	Sb09g003270	neighbouring_reaction_109846<->Reaction<->111835
phytozome	Sb01g032360	Sb09g003270	neighbouring_reaction_111835<->Reaction<->109846
phytozome	Sb01g032360	Sb09g008010	indirect_complex_109839
phytozome	Sb01g032360	Sb09g008010	indirect_complex_109888
phytozome	Sb01g032360	Sb09g008010	neighbouring_reaction_109846<->Reaction<->109889
phytozome	Sb01g032360	Sb09g008010	neighbouring_reaction_109846<->Reaction<->111131
phytozome	Sb01g032360	Sb09g008010	neighbouring_reaction_109846<->Reaction<->111835
phytozome	Sb01g032360	Sb09g008010	neighbouring_reaction_109887<->Reaction<->113594
phytozome	Sb01g032360	Sb09g008010	neighbouring_reaction_109887<->Reaction<->113595
phytozome	Sb01g032360	Sb09g008010	neighbouring_reaction_109889<->Reaction<->109846
phytozome	Sb01g032360	Sb09g008010	neighbouring_reaction_109889<->Reaction<->113594
phytozome	Sb01g032360	Sb09g008010	neighbouring_reaction_109889<->Reaction<->113595
phytozome	Sb01g032360	Sb09g008010	neighbouring_reaction_111131<->Reaction<->109846
phytozome	Sb01g032360	Sb09g008010	neighbouring_reaction_111835<->Reaction<->109846
phytozome	Sb01g032360	Sb09g008010	neighbouring_reaction_113594<->Reaction<->109887
phytozome	Sb01g032360	Sb09g008010	neighbouring_reaction_113594<->Reaction<->109889
phytozome	Sb01g032360	Sb09g008010	neighbouring_reaction_113595<->Reaction<->109887
phytozome	Sb01g032360	Sb09g008010	neighbouring_reaction_113595<->Reaction<->109889
phytozome	Sb01g032360	Sb09g008010	reaction_113594
phytozome	Sb01g032360	Sb09g022830	indirect_complex_109844
phytozome	Sb01g032360	Sb09g022830	neighbouring_reaction_109846<->Reaction<->109889
phytozome	Sb01g032360	Sb09g022830	neighbouring_reaction_109846<->Reaction<->111131
phytozome	Sb01g032360	Sb09g022830	neighbouring_reaction_109846<->Reaction<->111835
phytozome	Sb01g032360	Sb09g022830	neighbouring_reaction_109887<->Reaction<->113595
phytozome	Sb01g032360	Sb09g022830	neighbouring_reaction_109889<->Reaction<->109846
phytozome	Sb01g032360	Sb09g022830	neighbouring_reaction_109889<->Reaction<->113594
phytozome	Sb01g032360	Sb09g022830	neighbouring_reaction_109889<->Reaction<->113595
phytozome	Sb01g032360	Sb09g022830	neighbouring_reaction_111131<->Reaction<->109846
phytozome	Sb01g032360	Sb09g022830	neighbouring_reaction_111835<->Reaction<->109846
phytozome	Sb01g032360	Sb09g022830	neighbouring_reaction_113594<->Reaction<->109889
phytozome	Sb01g032360	Sb09g022830	neighbouring_reaction_113595<->Reaction<->109887
phytozome	Sb01g032360	Sb09g022830	neighbouring_reaction_113595<->Reaction<->109889
phytozome	Sb01g032360	Sb09g022830	reaction_113595
phytozome	Sb01g032360	Sb09g023360	indirect_complex_109839
phytozome	Sb01g032360	Sb09g023360	indirect_complex_109888
phytozome	Sb01g032360	Sb09g023360	neighbouring_reaction_109846<->Reaction<->109889
phytozome	Sb01g032360	Sb09g023360	neighbouring_reaction_109846<->Reaction<->111131
phytozome	Sb01g032360	Sb09g023360	neighbouring_reaction_109846<->Reaction<->111835
phytozome	Sb01g032360	Sb09g023360	neighbouring_reaction_109887<->Reaction<->113594
phytozome	Sb01g032360	Sb09g023360	neighbouring_reaction_109887<->Reaction<->113595
phytozome	Sb01g032360	Sb09g023360	neighbouring_reaction_109889<->Reaction<->109846
phytozome	Sb01g032360	Sb09g023360	neighbouring_reaction_109889<->Reaction<->113594
phytozome	Sb01g032360	Sb09g023360	neighbouring_reaction_109889<->Reaction<->113595
phytozome	Sb01g032360	Sb09g023360	neighbouring_reaction_111131<->Reaction<->109846
phytozome	Sb01g032360	Sb09g023360	neighbouring_reaction_111835<->Reaction<->109846
phytozome	Sb01g032360	Sb09g023360	neighbouring_reaction_113594<->Reaction<->109887
phytozome	Sb01g032360	Sb09g023360	neighbouring_reaction_113594<->Reaction<->109889
phytozome	Sb01g032360	Sb09g023360	neighbouring_reaction_113595<->Reaction<->109887
phytozome	Sb01g032360	Sb09g023360	neighbouring_reaction_113595<->Reaction<->109889
phytozome	Sb01g032360	Sb09g023360	reaction_113594
phytozome	Sb01g032360	Sb10g007540	indirect_complex_109844
phytozome	Sb01g032360	Sb10g007540	neighbouring_reaction_109846<->Reaction<->109889
phytozome	Sb01g032360	Sb10g007540	neighbouring_reaction_109846<->Reaction<->111131
phytozome	Sb01g032360	Sb10g007540	neighbouring_reaction_109887<->Reaction<->113595
phytozome	Sb01g032360	Sb10g007540	neighbouring_reaction_109889<->Reaction<->109846
phytozome	Sb01g032360	Sb10g007540	neighbouring_reaction_109889<->Reaction<->113594
phytozome	Sb01g032360	Sb10g007540	neighbouring_reaction_109889<->Reaction<->113595
phytozome	Sb01g032360	Sb10g007540	neighbouring_reaction_111131<->Reaction<->109846
phytozome	Sb01g032360	Sb10g007540	neighbouring_reaction_113594<->Reaction<->109889
phytozome	Sb01g032360	Sb10g007540	neighbouring_reaction_113595<->Reaction<->109887
phytozome	Sb01g032360	Sb10g007540	neighbouring_reaction_113595<->Reaction<->109889
phytozome	Sb01g032360	Sb10g007540	reaction_113595
phytozome	Sb01g033060	Sb0067s002010	neighbouring_reaction_115027<->Reaction<->115689
phytozome	Sb01g033060	Sb0067s002010	neighbouring_reaction_115689<->Reaction<->115027
phytozome	Sb01g033060	Sb0067s002110	neighbouring_reaction_115027<->Reaction<->115689
phytozome	Sb01g033060	Sb0067s002110	neighbouring_reaction_115689<->Reaction<->115027
phytozome	Sb01g033060	Sb0067s002130	neighbouring_reaction_115027<->Reaction<->115689
phytozome	Sb01g033060	Sb0067s002130	neighbouring_reaction_115689<->Reaction<->115027
phytozome	Sb01g033060	Sb0067s002240	neighbouring_reaction_115027<->Reaction<->115689
phytozome	Sb01g033060	Sb0067s002240	neighbouring_reaction_115689<->Reaction<->115027
phytozome	Sb01g033060	Sb01g007580	neighbouring_reaction_115039<->Reaction<->115602
phytozome	Sb01g033060	Sb01g007580	neighbouring_reaction_115602<->Reaction<->115039
phytozome	Sb01g033060	Sb01g007580	neighbouring_reaction_115039<->Reaction<->115602
phytozome	Sb01g033060	Sb01g007580	neighbouring_reaction_115602<->Reaction<->115039
phytozome	Sb01g033060	Sb01g007580	neighbouring_reaction_115039<->Reaction<->115602
phytozome	Sb01g033060	Sb01g007580	neighbouring_reaction_115602<->Reaction<->115039
phytozome	Sb01g033060	Sb01g007580	neighbouring_reaction_115039<->Reaction<->115602
phytozome	Sb01g033060	Sb01g007580	neighbouring_reaction_115602<->Reaction<->115039
phytozome	Sb01g033060	Sb01g007580	neighbouring_reaction_115039<->Reaction<->115602
phytozome	Sb01g033060	Sb01g007580	neighbouring_reaction_115602<->Reaction<->115039
phytozome	Sb01g033060	Sb01g008910	neighbouring_reaction_115027<->Reaction<->115689
phytozome	Sb01g033060	Sb01g008910	neighbouring_reaction_115689<->Reaction<->115027
phytozome	Sb01g033060	Sb01g014970	neighbouring_reaction_115039<->Reaction<->115602
phytozome	Sb01g033060	Sb01g014970	neighbouring_reaction_115602<->Reaction<->115039
phytozome	Sb01g033060	Sb01g035380	neighbouring_reaction_115039<->Reaction<->115463
phytozome	Sb01g033060	Sb01g035380	neighbouring_reaction_115463<->Reaction<->115039
phytozome	Sb01g033060	Sb01g043150	neighbouring_reaction_115039<->Reaction<->115602
phytozome	Sb01g033060	Sb01g043150	neighbouring_reaction_115602<->Reaction<->115039
phytozome	Sb01g033060	Sb02g030500	neighbouring_reaction_115039<->Reaction<->115460
phytozome	Sb01g033060	Sb02g030500	neighbouring_reaction_115460<->Reaction<->115039
phytozome	Sb01g033060	Sb02g032250	neighbouring_reaction_108574<->Reaction<->115039
phytozome	Sb01g033060	Sb02g032250	neighbouring_reaction_110534<->Reaction<->115039
phytozome	Sb01g033060	Sb02g032250	neighbouring_reaction_115039<->Reaction<->108574
phytozome	Sb01g033060	Sb02g032250	neighbouring_reaction_115039<->Reaction<->110534
phytozome	Sb01g033060	Sb02g032250	neighbouring_reaction_115689<->Reaction<->115777
phytozome	Sb01g033060	Sb02g032250	neighbouring_reaction_115777<->Reaction<->115689
phytozome	Sb01g033060	Sb04g001320	neighbouring_reaction_108574<->Reaction<->115039
phytozome	Sb01g033060	Sb04g001320	neighbouring_reaction_110534<->Reaction<->115039
phytozome	Sb01g033060	Sb04g001320	neighbouring_reaction_115039<->Reaction<->108574
phytozome	Sb01g033060	Sb04g001320	neighbouring_reaction_115039<->Reaction<->110534
phytozome	Sb01g033060	Sb04g001320	neighbouring_reaction_115689<->Reaction<->115777
phytozome	Sb01g033060	Sb04g001320	neighbouring_reaction_115777<->Reaction<->115689
phytozome	Sb01g033060	Sb04g021810	neighbouring_reaction_115027<->Reaction<->115689
phytozome	Sb01g033060	Sb04g021810	neighbouring_reaction_115689<->Reaction<->115027
phytozome	Sb01g033060	Sb04g021810	neighbouring_reaction_115027<->Reaction<->115689
phytozome	Sb01g033060	Sb04g021810	neighbouring_reaction_115689<->Reaction<->115027
phytozome	Sb01g033060	Sb04g021810	neighbouring_reaction_115027<->Reaction<->115689
phytozome	Sb01g033060	Sb04g021810	neighbouring_reaction_115689<->Reaction<->115027
phytozome	Sb01g033360	Sb02g024040	neighbouring_reaction_106186<->Reaction<->113542
phytozome	Sb01g033360	Sb02g024040	neighbouring_reaction_113542<->Reaction<->106186
phytozome	Sb01g033360	Sb03g013290	neighbouring_reaction_106186<->Reaction<->114645
phytozome	Sb01g033360	Sb03g013290	neighbouring_reaction_114645<->Reaction<->106186
phytozome	Sb01g033360	Sb09g004610	neighbouring_reaction_106186<->Reaction<->114645
phytozome	Sb01g033360	Sb09g004610	neighbouring_reaction_114645<->Reaction<->106186
phytozome	Sb01g033360	Sb02g024040	neighbouring_reaction_106186<->Reaction<->113542
phytozome	Sb01g033360	Sb02g024040	neighbouring_reaction_113542<->Reaction<->106186
phytozome	Sb01g033360	Sb03g013290	neighbouring_reaction_106186<->Reaction<->114645
phytozome	Sb01g033360	Sb03g013290	neighbouring_reaction_114645<->Reaction<->106186
phytozome	Sb01g033360	Sb09g004610	neighbouring_reaction_106186<->Reaction<->114645
phytozome	Sb01g033360	Sb09g004610	neighbouring_reaction_114645<->Reaction<->106186
phytozome	Sb01g033480	Sb01g018210	neighbouring_reaction_114413<->Reaction<->114431
phytozome	Sb01g033480	Sb01g018210	neighbouring_reaction_114413<->Reaction<->114432
phytozome	Sb01g033480	Sb01g018210	neighbouring_reaction_114431<->Reaction<->114413
phytozome	Sb01g033480	Sb01g018210	neighbouring_reaction_114432<->Reaction<->114413
phytozome	Sb01g033480	Sb01g018210	neighbouring_reaction_114413<->Reaction<->114431
phytozome	Sb01g033480	Sb01g018210	neighbouring_reaction_114413<->Reaction<->114432
phytozome	Sb01g033480	Sb01g018210	neighbouring_reaction_114431<->Reaction<->114413
phytozome	Sb01g033480	Sb01g018210	neighbouring_reaction_114432<->Reaction<->114413
phytozome	Sb01g033480	Sb01g018210	neighbouring_reaction_114413<->Reaction<->114431
phytozome	Sb01g033480	Sb01g018210	neighbouring_reaction_114413<->Reaction<->114432
phytozome	Sb01g033480	Sb01g018210	neighbouring_reaction_114431<->Reaction<->114413
phytozome	Sb01g033480	Sb01g018210	neighbouring_reaction_114432<->Reaction<->114413
phytozome	Sb01g033480	Sb01g018210	neighbouring_reaction_114413<->Reaction<->114431
phytozome	Sb01g033480	Sb01g018210	neighbouring_reaction_114413<->Reaction<->114432
phytozome	Sb01g033480	Sb01g018210	neighbouring_reaction_114431<->Reaction<->114413
phytozome	Sb01g033480	Sb01g018210	neighbouring_reaction_114432<->Reaction<->114413
phytozome	Sb01g034130	Sb01g034130	neighbouring_reaction_114077<->Reaction<->114105
phytozome	Sb01g034130	Sb01g034130	neighbouring_reaction_114100<->Reaction<->114105
phytozome	Sb01g034130	Sb01g034130	neighbouring_reaction_114101<->Reaction<->114102
phytozome	Sb01g034130	Sb01g034130	neighbouring_reaction_114102<->Reaction<->114101
phytozome	Sb01g034130	Sb01g034130	neighbouring_reaction_114102<->Reaction<->114103
phytozome	Sb01g034130	Sb01g034130	neighbouring_reaction_114103<->Reaction<->114102
phytozome	Sb01g034130	Sb01g034130	neighbouring_reaction_114105<->Reaction<->114077
phytozome	Sb01g034130	Sb01g034130	neighbouring_reaction_114105<->Reaction<->114100
phytozome	Sb01g034130	Sb03g033120	neighbouring_reaction_113327<->Reaction<->114076
phytozome	Sb01g034130	Sb03g033120	neighbouring_reaction_114076<->Reaction<->113327
phytozome	Sb01g034130	Sb09g026560	neighbouring_reaction_113327<->Reaction<->114076
phytozome	Sb01g034130	Sb09g026560	neighbouring_reaction_114076<->Reaction<->113327
phytozome	Sb01g035380	Sb01g007580	neighbouring_reaction_115463<->Reaction<->115602
phytozome	Sb01g035380	Sb01g007580	neighbouring_reaction_115602<->Reaction<->115463
phytozome	Sb01g035380	Sb01g007580	neighbouring_reaction_115694<->Reaction<->115697
phytozome	Sb01g035380	Sb01g007580	neighbouring_reaction_115697<->Reaction<->115694
phytozome	Sb01g035380	Sb01g007580	neighbouring_reaction_115463<->Reaction<->115602
phytozome	Sb01g035380	Sb01g007580	neighbouring_reaction_115602<->Reaction<->115463
phytozome	Sb01g035380	Sb01g007580	neighbouring_reaction_115694<->Reaction<->115697
phytozome	Sb01g035380	Sb01g007580	neighbouring_reaction_115697<->Reaction<->115694
phytozome	Sb01g035380	Sb01g007580	neighbouring_reaction_115463<->Reaction<->115602
phytozome	Sb01g035380	Sb01g007580	neighbouring_reaction_115602<->Reaction<->115463
phytozome	Sb01g035380	Sb01g007580	neighbouring_reaction_115694<->Reaction<->115697
phytozome	Sb01g035380	Sb01g007580	neighbouring_reaction_115697<->Reaction<->115694
phytozome	Sb01g035380	Sb01g007580	neighbouring_reaction_115463<->Reaction<->115602
phytozome	Sb01g035380	Sb01g007580	neighbouring_reaction_115602<->Reaction<->115463
phytozome	Sb01g035380	Sb01g007580	neighbouring_reaction_115694<->Reaction<->115697
phytozome	Sb01g035380	Sb01g007580	neighbouring_reaction_115697<->Reaction<->115694
phytozome	Sb01g035380	Sb01g007580	neighbouring_reaction_115463<->Reaction<->115602
phytozome	Sb01g035380	Sb01g007580	neighbouring_reaction_115602<->Reaction<->115463
phytozome	Sb01g035380	Sb01g007580	neighbouring_reaction_115694<->Reaction<->115697
phytozome	Sb01g035380	Sb01g007580	neighbouring_reaction_115697<->Reaction<->115694
phytozome	Sb01g035380	Sb01g014970	neighbouring_reaction_115463<->Reaction<->115602
phytozome	Sb01g035380	Sb01g014970	neighbouring_reaction_115602<->Reaction<->115463
phytozome	Sb01g035380	Sb01g014970	neighbouring_reaction_115694<->Reaction<->115697
phytozome	Sb01g035380	Sb01g014970	neighbouring_reaction_115697<->Reaction<->115694
phytozome	Sb01g035380	Sb01g039050	neighbouring_reaction_111286<->Reaction<->111287
phytozome	Sb01g035380	Sb01g039050	neighbouring_reaction_111287<->Reaction<->111286
phytozome	Sb01g035380	Sb01g039220	neighbouring_reaction_115463<->Reaction<->115628
phytozome	Sb01g035380	Sb01g039220	neighbouring_reaction_115628<->Reaction<->115463
phytozome	Sb01g035380	Sb01g039340	neighbouring_reaction_115463<->Reaction<->115628
phytozome	Sb01g035380	Sb01g039340	neighbouring_reaction_115628<->Reaction<->115463
phytozome	Sb01g035380	Sb01g043150	neighbouring_reaction_115463<->Reaction<->115602
phytozome	Sb01g035380	Sb01g043150	neighbouring_reaction_115602<->Reaction<->115463
phytozome	Sb01g035380	Sb01g043150	neighbouring_reaction_115694<->Reaction<->115697
phytozome	Sb01g035380	Sb01g043150	neighbouring_reaction_115697<->Reaction<->115694
phytozome	Sb01g035380	Sb02g004010	neighbouring_reaction_115697<->Reaction<->115776
phytozome	Sb01g035380	Sb02g004010	neighbouring_reaction_115776<->Reaction<->115697
phytozome	Sb01g035380	Sb02g032250	neighbouring_reaction_110534<->Reaction<->115463
phytozome	Sb01g035380	Sb02g032250	neighbouring_reaction_115463<->Reaction<->110534
phytozome	Sb01g035380	Sb02g032250	neighbouring_reaction_115697<->Reaction<->115777
phytozome	Sb01g035380	Sb02g032250	neighbouring_reaction_115777<->Reaction<->115697
phytozome	Sb01g035380	Sb03g039180	neighbouring_reaction_111286<->Reaction<->111287
phytozome	Sb01g035380	Sb03g039180	neighbouring_reaction_111287<->Reaction<->111286
phytozome	Sb01g035380	Sb04g001320	neighbouring_reaction_110534<->Reaction<->115463
phytozome	Sb01g035380	Sb04g001320	neighbouring_reaction_115463<->Reaction<->110534
phytozome	Sb01g035380	Sb04g001320	neighbouring_reaction_115697<->Reaction<->115777
phytozome	Sb01g035380	Sb04g001320	neighbouring_reaction_115777<->Reaction<->115697
phytozome	Sb01g035380	Sb09g008220	neighbouring_reaction_115463<->Reaction<->115628
phytozome	Sb01g035380	Sb09g008220	neighbouring_reaction_115628<->Reaction<->115463
phytozome	Sb01g035870	Sb01g036690	neighbouring_reaction_109063<->Reaction<->112027
phytozome	Sb01g035870	Sb01g036690	neighbouring_reaction_112027<->Reaction<->109063
phytozome	Sb01g035870	Sb03g011130	neighbouring_reaction_109063<->Reaction<->112027
phytozome	Sb01g035870	Sb03g011130	neighbouring_reaction_112027<->Reaction<->109063
phytozome	Sb01g035870	Sb06g032940	neighbouring_reaction_109063<->Reaction<->112027
phytozome	Sb01g035870	Sb06g032940	neighbouring_reaction_112027<->Reaction<->109063
phytozome	Sb01g035890	Sb0067s002010	neighbouring_reaction_115027<->Reaction<->115689
phytozome	Sb01g035890	Sb0067s002010	neighbouring_reaction_115689<->Reaction<->115027
phytozome	Sb01g035890	Sb0067s002110	neighbouring_reaction_115027<->Reaction<->115689
phytozome	Sb01g035890	Sb0067s002110	neighbouring_reaction_115689<->Reaction<->115027
phytozome	Sb01g035890	Sb0067s002130	neighbouring_reaction_115027<->Reaction<->115689
phytozome	Sb01g035890	Sb0067s002130	neighbouring_reaction_115689<->Reaction<->115027
phytozome	Sb01g035890	Sb0067s002240	neighbouring_reaction_115027<->Reaction<->115689
phytozome	Sb01g035890	Sb0067s002240	neighbouring_reaction_115689<->Reaction<->115027
phytozome	Sb01g035890	Sb01g007580	neighbouring_reaction_115039<->Reaction<->115602
phytozome	Sb01g035890	Sb01g007580	neighbouring_reaction_115602<->Reaction<->115039
phytozome	Sb01g035890	Sb01g007580	neighbouring_reaction_115039<->Reaction<->115602
phytozome	Sb01g035890	Sb01g007580	neighbouring_reaction_115602<->Reaction<->115039
phytozome	Sb01g035890	Sb01g007580	neighbouring_reaction_115039<->Reaction<->115602
phytozome	Sb01g035890	Sb01g007580	neighbouring_reaction_115602<->Reaction<->115039
phytozome	Sb01g035890	Sb01g007580	neighbouring_reaction_115039<->Reaction<->115602
phytozome	Sb01g035890	Sb01g007580	neighbouring_reaction_115602<->Reaction<->115039
phytozome	Sb01g035890	Sb01g007580	neighbouring_reaction_115039<->Reaction<->115602
phytozome	Sb01g035890	Sb01g007580	neighbouring_reaction_115602<->Reaction<->115039
phytozome	Sb01g035890	Sb01g008910	neighbouring_reaction_115027<->Reaction<->115689
phytozome	Sb01g035890	Sb01g008910	neighbouring_reaction_115689<->Reaction<->115027
phytozome	Sb01g035890	Sb01g014970	neighbouring_reaction_115039<->Reaction<->115602
phytozome	Sb01g035890	Sb01g014970	neighbouring_reaction_115602<->Reaction<->115039
phytozome	Sb01g035890	Sb01g035380	neighbouring_reaction_115039<->Reaction<->115463
phytozome	Sb01g035890	Sb01g035380	neighbouring_reaction_115463<->Reaction<->115039
phytozome	Sb01g035890	Sb01g043150	neighbouring_reaction_115039<->Reaction<->115602
phytozome	Sb01g035890	Sb01g043150	neighbouring_reaction_115602<->Reaction<->115039
phytozome	Sb01g035890	Sb02g030500	neighbouring_reaction_115039<->Reaction<->115460
phytozome	Sb01g035890	Sb02g030500	neighbouring_reaction_115460<->Reaction<->115039
phytozome	Sb01g035890	Sb02g032250	neighbouring_reaction_108574<->Reaction<->115039
phytozome	Sb01g035890	Sb02g032250	neighbouring_reaction_110534<->Reaction<->115039
phytozome	Sb01g035890	Sb02g032250	neighbouring_reaction_115039<->Reaction<->108574
phytozome	Sb01g035890	Sb02g032250	neighbouring_reaction_115039<->Reaction<->110534
phytozome	Sb01g035890	Sb02g032250	neighbouring_reaction_115689<->Reaction<->115777
phytozome	Sb01g035890	Sb02g032250	neighbouring_reaction_115777<->Reaction<->115689
phytozome	Sb01g035890	Sb04g001320	neighbouring_reaction_108574<->Reaction<->115039
phytozome	Sb01g035890	Sb04g001320	neighbouring_reaction_110534<->Reaction<->115039
phytozome	Sb01g035890	Sb04g001320	neighbouring_reaction_115039<->Reaction<->108574
phytozome	Sb01g035890	Sb04g001320	neighbouring_reaction_115039<->Reaction<->110534
phytozome	Sb01g035890	Sb04g001320	neighbouring_reaction_115689<->Reaction<->115777
phytozome	Sb01g035890	Sb04g001320	neighbouring_reaction_115777<->Reaction<->115689
phytozome	Sb01g035890	Sb04g021810	neighbouring_reaction_115027<->Reaction<->115689
phytozome	Sb01g035890	Sb04g021810	neighbouring_reaction_115689<->Reaction<->115027
phytozome	Sb01g035890	Sb04g021810	neighbouring_reaction_115027<->Reaction<->115689
phytozome	Sb01g035890	Sb04g021810	neighbouring_reaction_115689<->Reaction<->115027
phytozome	Sb01g035890	Sb04g021810	neighbouring_reaction_115027<->Reaction<->115689
phytozome	Sb01g035890	Sb04g021810	neighbouring_reaction_115689<->Reaction<->115027
phytozome	Sb01g035960	Sb01g008690	neighbouring_reaction_107849<->Reaction<->113037
phytozome	Sb01g035960	Sb01g008690	neighbouring_reaction_113037<->Reaction<->107849
phytozome	Sb01g035960	Sb01g008690	neighbouring_reaction_107849<->Reaction<->113037
phytozome	Sb01g035960	Sb01g008690	neighbouring_reaction_113037<->Reaction<->107849
phytozome	Sb01g035960	Sb08g003440	neighbouring_reaction_111953<->Reaction<->113037
phytozome	Sb01g035960	Sb08g003440	neighbouring_reaction_113037<->Reaction<->111953
phytozome	Sb01g035960	Sb10g000400	neighbouring_reaction_109061<->Reaction<->113037
phytozome	Sb01g035960	Sb10g000400	neighbouring_reaction_113037<->Reaction<->109061
phytozome	Sb01g036340	Sb07g005460	neighbouring_reaction_105721<->Reaction<->105728
phytozome	Sb01g036340	Sb07g005460	neighbouring_reaction_105728<->Reaction<->105721
phytozome	Sb01g036340	Sb07g005460	neighbouring_reaction_105721<->Reaction<->105728
phytozome	Sb01g036340	Sb07g005460	neighbouring_reaction_105728<->Reaction<->105721
phytozome	Sb01g036420	Sb02g023480	neighbouring_reaction_106927<->Reaction<->106931
phytozome	Sb01g036420	Sb02g023480	neighbouring_reaction_106931<->Reaction<->106927
phytozome	Sb01g036420	Sb04g004690	neighbouring_reaction_106927<->Reaction<->108881
phytozome	Sb01g036420	Sb04g004690	neighbouring_reaction_108881<->Reaction<->106927
phytozome	Sb01g036420	Sb04g004690	neighbouring_reaction_106927<->Reaction<->108881
phytozome	Sb01g036420	Sb04g004690	neighbouring_reaction_108881<->Reaction<->106927
phytozome	Sb01g036420	Sb09g024340	neighbouring_reaction_106927<->Reaction<->108881
phytozome	Sb01g036420	Sb09g024340	neighbouring_reaction_108881<->Reaction<->106927
phytozome	Sb01g036420	Sb10g026710	neighbouring_reaction_106927<->Reaction<->108881
phytozome	Sb01g036420	Sb10g026710	neighbouring_reaction_108881<->Reaction<->106927
phytozome	Sb01g036420	Sb10g026710	neighbouring_reaction_106927<->Reaction<->108881
phytozome	Sb01g036420	Sb10g026710	neighbouring_reaction_108881<->Reaction<->106927
phytozome	Sb01g036420	Sb10g026710	neighbouring_reaction_106927<->Reaction<->108881
phytozome	Sb01g036420	Sb10g026710	neighbouring_reaction_108881<->Reaction<->106927
phytozome	Sb01g036510	Sb01g036690	neighbouring_reaction_109070<->Reaction<->109351
phytozome	Sb01g036510	Sb01g036690	neighbouring_reaction_109351<->Reaction<->109070
phytozome	Sb01g036510	Sb03g011130	neighbouring_reaction_109070<->Reaction<->109351
phytozome	Sb01g036510	Sb03g011130	neighbouring_reaction_109351<->Reaction<->109070
phytozome	Sb01g036510	Sb03g044860	neighbouring_reaction_109390<->Reaction<->115098
phytozome	Sb01g036510	Sb03g044860	neighbouring_reaction_109391<->Reaction<->115098
phytozome	Sb01g036510	Sb03g044860	neighbouring_reaction_115098<->Reaction<->109390
phytozome	Sb01g036510	Sb03g044860	neighbouring_reaction_115098<->Reaction<->109391
phytozome	Sb01g036510	Sb06g021460	neighbouring_reaction_109070<->Reaction<->110744
phytozome	Sb01g036510	Sb06g021460	neighbouring_reaction_110744<->Reaction<->109070
phytozome	Sb01g036510	Sb06g032940	neighbouring_reaction_109070<->Reaction<->109351
phytozome	Sb01g036510	Sb06g032940	neighbouring_reaction_109351<->Reaction<->109070
phytozome	Sb01g036510	Sb09g018200	neighbouring_reaction_109390<->Reaction<->115098
phytozome	Sb01g036510	Sb09g018200	neighbouring_reaction_109391<->Reaction<->115098
phytozome	Sb01g036510	Sb09g018200	neighbouring_reaction_115098<->Reaction<->109390
phytozome	Sb01g036510	Sb09g018200	neighbouring_reaction_115098<->Reaction<->109391
phytozome	Sb01g036510	Sb10g009290	neighbouring_reaction_109070<->Reaction<->110744
phytozome	Sb01g036510	Sb10g009290	neighbouring_reaction_110744<->Reaction<->109070
phytozome	Sb01g036690	Sb02g021090	neighbouring_reaction_109351<->Reaction<->114269
phytozome	Sb01g036690	Sb02g021090	neighbouring_reaction_114043<->Reaction<->114269
phytozome	Sb01g036690	Sb02g021090	neighbouring_reaction_114269<->Reaction<->109351
phytozome	Sb01g036690	Sb02g021090	neighbouring_reaction_114269<->Reaction<->114043
phytozome	Sb01g036690	Sb03g013290	neighbouring_reaction_109351<->Reaction<->114645
phytozome	Sb01g036690	Sb03g013290	neighbouring_reaction_109351<->Reaction<->114646
phytozome	Sb01g036690	Sb03g013290	neighbouring_reaction_114043<->Reaction<->114645
phytozome	Sb01g036690	Sb03g013290	neighbouring_reaction_114043<->Reaction<->114646
phytozome	Sb01g036690	Sb03g013290	neighbouring_reaction_114645<->Reaction<->109351
phytozome	Sb01g036690	Sb03g013290	neighbouring_reaction_114645<->Reaction<->114043
phytozome	Sb01g036690	Sb03g013290	neighbouring_reaction_114646<->Reaction<->109351
phytozome	Sb01g036690	Sb03g013290	neighbouring_reaction_114646<->Reaction<->114043
phytozome	Sb01g036690	Sb03g035090	neighbouring_reaction_109351<->Reaction<->114269
phytozome	Sb01g036690	Sb03g035090	neighbouring_reaction_114043<->Reaction<->114269
phytozome	Sb01g036690	Sb03g035090	neighbouring_reaction_114269<->Reaction<->109351
phytozome	Sb01g036690	Sb03g035090	neighbouring_reaction_114269<->Reaction<->114043
phytozome	Sb01g036690	Sb03g041040	neighbouring_reaction_110748<->Reaction<->110749
phytozome	Sb01g036690	Sb03g041040	neighbouring_reaction_110749<->Reaction<->110748
phytozome	Sb01g036690	Sb03g041040	neighbouring_reaction_110851<->Reaction<->110852
phytozome	Sb01g036690	Sb03g041040	neighbouring_reaction_110852<->Reaction<->110851
phytozome	Sb01g036690	Sb04g008720	neighbouring_reaction_109351<->Reaction<->114269
phytozome	Sb01g036690	Sb04g008720	neighbouring_reaction_114043<->Reaction<->114269
phytozome	Sb01g036690	Sb04g008720	neighbouring_reaction_114269<->Reaction<->109351
phytozome	Sb01g036690	Sb04g008720	neighbouring_reaction_114269<->Reaction<->114043
phytozome	Sb01g036690	Sb06g021460	neighbouring_reaction_109351<->Reaction<->110744
phytozome	Sb01g036690	Sb06g021460	neighbouring_reaction_110744<->Reaction<->109351
phytozome	Sb01g036690	Sb06g021460	neighbouring_reaction_110744<->Reaction<->110749
phytozome	Sb01g036690	Sb06g021460	neighbouring_reaction_110749<->Reaction<->110744
phytozome	Sb01g036690	Sb06g021460	neighbouring_reaction_110850<->Reaction<->110852
phytozome	Sb01g036690	Sb06g021460	neighbouring_reaction_110850<->Reaction<->112027
phytozome	Sb01g036690	Sb06g021460	neighbouring_reaction_110852<->Reaction<->110850
phytozome	Sb01g036690	Sb06g021460	neighbouring_reaction_112027<->Reaction<->110850
phytozome	Sb01g036690	Sb07g014960	neighbouring_reaction_109351<->Reaction<->114269
phytozome	Sb01g036690	Sb07g014960	neighbouring_reaction_114043<->Reaction<->114269
phytozome	Sb01g036690	Sb07g014960	neighbouring_reaction_114269<->Reaction<->109351
phytozome	Sb01g036690	Sb07g014960	neighbouring_reaction_114269<->Reaction<->114043
phytozome	Sb01g036690	Sb09g004610	neighbouring_reaction_109351<->Reaction<->114645
phytozome	Sb01g036690	Sb09g004610	neighbouring_reaction_109351<->Reaction<->114646
phytozome	Sb01g036690	Sb09g004610	neighbouring_reaction_114043<->Reaction<->114645
phytozome	Sb01g036690	Sb09g004610	neighbouring_reaction_114043<->Reaction<->114646
phytozome	Sb01g036690	Sb09g004610	neighbouring_reaction_114645<->Reaction<->109351
phytozome	Sb01g036690	Sb09g004610	neighbouring_reaction_114645<->Reaction<->114043
phytozome	Sb01g036690	Sb09g004610	neighbouring_reaction_114646<->Reaction<->109351
phytozome	Sb01g036690	Sb09g004610	neighbouring_reaction_114646<->Reaction<->114043
phytozome	Sb01g036690	Sb10g009290	neighbouring_reaction_109351<->Reaction<->110744
phytozome	Sb01g036690	Sb10g009290	neighbouring_reaction_110744<->Reaction<->109351
phytozome	Sb01g036690	Sb10g009290	neighbouring_reaction_110744<->Reaction<->110749
phytozome	Sb01g036690	Sb10g009290	neighbouring_reaction_110749<->Reaction<->110744
phytozome	Sb01g036690	Sb10g009290	neighbouring_reaction_110850<->Reaction<->110852
phytozome	Sb01g036690	Sb10g009290	neighbouring_reaction_110850<->Reaction<->112027
phytozome	Sb01g036690	Sb10g009290	neighbouring_reaction_110852<->Reaction<->110850
phytozome	Sb01g036690	Sb10g009290	neighbouring_reaction_112027<->Reaction<->110850
phytozome	Sb01g036690	Sb10g021330	neighbouring_reaction_109351<->Reaction<->114269
phytozome	Sb01g036690	Sb10g021330	neighbouring_reaction_114043<->Reaction<->114269
phytozome	Sb01g036690	Sb10g021330	neighbouring_reaction_114269<->Reaction<->109351
phytozome	Sb01g036690	Sb10g021330	neighbouring_reaction_114269<->Reaction<->114043
phytozome	Sb01g037340	Sb01g006190	direct_complex_114548
phytozome	Sb01g037340	Sb01g006190	neighbouring_reaction_114523<->Reaction<->114549
phytozome	Sb01g037340	Sb01g006190	neighbouring_reaction_114549<->Reaction<->114523
phytozome	Sb01g037340	Sb01g006190	reaction_114549
phytozome	Sb01g037340	Sb01g009920	neighbouring_reaction_108411<->Reaction<->114532
phytozome	Sb01g037340	Sb01g009920	neighbouring_reaction_108411<->Reaction<->115253
phytozome	Sb01g037340	Sb01g009920	neighbouring_reaction_114532<->Reaction<->108411
phytozome	Sb01g037340	Sb01g009920	neighbouring_reaction_115253<->Reaction<->108411
phytozome	Sb01g037340	Sb01g009920	neighbouring_reaction_108411<->Reaction<->114532
phytozome	Sb01g037340	Sb01g009920	neighbouring_reaction_108411<->Reaction<->115253
phytozome	Sb01g037340	Sb01g009920	neighbouring_reaction_114532<->Reaction<->108411
phytozome	Sb01g037340	Sb01g009920	neighbouring_reaction_115253<->Reaction<->108411
phytozome	Sb01g037340	Sb01g013843	direct_complex_114548
phytozome	Sb01g037340	Sb01g013843	neighbouring_reaction_114523<->Reaction<->114549
phytozome	Sb01g037340	Sb01g013843	neighbouring_reaction_114549<->Reaction<->114523
phytozome	Sb01g037340	Sb01g013843	reaction_114549
phytozome	Sb01g037340	Sb01g037340	neighbouring_reaction_108411<->Reaction<->114532
phytozome	Sb01g037340	Sb01g037340	neighbouring_reaction_108411<->Reaction<->115253
phytozome	Sb01g037340	Sb01g037340	neighbouring_reaction_114532<->Reaction<->108411
phytozome	Sb01g037340	Sb01g037340	neighbouring_reaction_115253<->Reaction<->108411
phytozome	Sb01g037340	Sb02g002760	direct_complex_114548
phytozome	Sb01g037340	Sb02g002760	neighbouring_reaction_114523<->Reaction<->114549
phytozome	Sb01g037340	Sb02g002760	neighbouring_reaction_114549<->Reaction<->114523
phytozome	Sb01g037340	Sb02g002760	reaction_114549
phytozome	Sb01g037340	Sb10g010050	direct_complex_114531
phytozome	Sb01g037340	Sb10g010050	neighbouring_reaction_108411<->Reaction<->114532
phytozome	Sb01g037340	Sb10g010050	neighbouring_reaction_114532<->Reaction<->108411
phytozome	Sb01g037340	Sb10g010050	reaction_114532
phytozome	Sb01g037450	Sb01g037450	neighbouring_reaction_111529<->Reaction<->115800
phytozome	Sb01g037450	Sb01g037450	neighbouring_reaction_115800<->Reaction<->111529
phytozome	Sb01g037450	Sb07g002810	direct_complex_111528
phytozome	Sb01g037450	Sb07g002810	neighbouring_reaction_111529<->Reaction<->115800
phytozome	Sb01g037450	Sb07g002810	neighbouring_reaction_115800<->Reaction<->111529
phytozome	Sb01g037450	Sb07g002810	reaction_111529
phytozome	Sb01g037450	Sb07g002820	direct_complex_111528
phytozome	Sb01g037450	Sb07g002820	neighbouring_reaction_111529<->Reaction<->115800
phytozome	Sb01g037450	Sb07g002820	neighbouring_reaction_115800<->Reaction<->111529
phytozome	Sb01g037450	Sb07g002820	reaction_111529
phytozome	Sb01g037450	Sb08g016860	indirect_complex_115799
phytozome	Sb01g037450	Sb08g016860	neighbouring_reaction_111529<->Reaction<->115800
phytozome	Sb01g037450	Sb08g016860	neighbouring_reaction_115800<->Reaction<->111529
phytozome	Sb01g037450	Sb08g016860	reaction_115800
phytozome	Sb01g037450	Sb09g003500	indirect_complex_115799
phytozome	Sb01g037450	Sb09g003500	neighbouring_reaction_111529<->Reaction<->115800
phytozome	Sb01g037450	Sb09g003500	neighbouring_reaction_115800<->Reaction<->111529
phytozome	Sb01g037450	Sb09g003500	reaction_115800
phytozome	Sb01g037450	Sb10g004560	neighbouring_reaction_111529<->Reaction<->115800
phytozome	Sb01g037450	Sb10g004560	neighbouring_reaction_115800<->Reaction<->111529
phytozome	Sb01g037570	Sb06g000580	neighbouring_reaction_113043<->Reaction<->113721
phytozome	Sb01g037570	Sb06g000580	neighbouring_reaction_113721<->Reaction<->113043
phytozome	Sb01g037570	Sb08g008320	neighbouring_reaction_109154<->Reaction<->113721
phytozome	Sb01g037570	Sb08g008320	neighbouring_reaction_113045<->Reaction<->113109
phytozome	Sb01g037570	Sb08g008320	neighbouring_reaction_113109<->Reaction<->113045
phytozome	Sb01g037570	Sb08g008320	neighbouring_reaction_113721<->Reaction<->109154
phytozome	Sb01g037570	Sb09g004730	neighbouring_reaction_109117<->Reaction<->113721
phytozome	Sb01g037570	Sb09g004730	neighbouring_reaction_113721<->Reaction<->109117
phytozome	Sb01g037570	Sb09g004730	neighbouring_reaction_109117<->Reaction<->113721
phytozome	Sb01g037570	Sb09g004730	neighbouring_reaction_113721<->Reaction<->109117
phytozome	Sb01g037570	Sb10g002070	neighbouring_reaction_113044<->Reaction<->113721
phytozome	Sb01g037570	Sb10g002070	neighbouring_reaction_113721<->Reaction<->113044
phytozome	Sb01g037860	Sb01g039050	neighbouring_reaction_115652<->Reaction<->115670
phytozome	Sb01g037860	Sb01g039050	neighbouring_reaction_115670<->Reaction<->115652
phytozome	Sb01g037860	Sb03g039180	neighbouring_reaction_115652<->Reaction<->115670
phytozome	Sb01g037860	Sb03g039180	neighbouring_reaction_115670<->Reaction<->115652
phytozome	Sb01g038360	Sb01g036690	neighbouring_reaction_106518<->Reaction<->109351
phytozome	Sb01g038360	Sb01g036690	neighbouring_reaction_109351<->Reaction<->106518
phytozome	Sb01g038360	Sb01g044580	neighbouring_reaction_108334<->Reaction<->111365
phytozome	Sb01g038360	Sb01g044580	neighbouring_reaction_111365<->Reaction<->108334
phytozome	Sb01g038360	Sb02g039600	neighbouring_reaction_108334<->Reaction<->111365
phytozome	Sb01g038360	Sb02g039600	neighbouring_reaction_111365<->Reaction<->108334
phytozome	Sb01g038360	Sb02g039600	neighbouring_reaction_108334<->Reaction<->111365
phytozome	Sb01g038360	Sb02g039600	neighbouring_reaction_111365<->Reaction<->108334
phytozome	Sb01g038360	Sb02g039600	neighbouring_reaction_108334<->Reaction<->111365
phytozome	Sb01g038360	Sb02g039600	neighbouring_reaction_111365<->Reaction<->108334
phytozome	Sb01g038360	Sb02g039610	neighbouring_reaction_108334<->Reaction<->111365
phytozome	Sb01g038360	Sb02g039610	neighbouring_reaction_111365<->Reaction<->108334
phytozome	Sb01g038360	Sb02g039610	neighbouring_reaction_108334<->Reaction<->111365
phytozome	Sb01g038360	Sb02g039610	neighbouring_reaction_111365<->Reaction<->108334
phytozome	Sb01g038360	Sb02g039610	neighbouring_reaction_108334<->Reaction<->111365
phytozome	Sb01g038360	Sb02g039610	neighbouring_reaction_111365<->Reaction<->108334
phytozome	Sb01g038360	Sb03g011130	neighbouring_reaction_106518<->Reaction<->109351
phytozome	Sb01g038360	Sb03g011130	neighbouring_reaction_109351<->Reaction<->106518
phytozome	Sb01g038360	Sb06g001120	neighbouring_reaction_106518<->Reaction<->106532
phytozome	Sb01g038360	Sb06g001120	neighbouring_reaction_106532<->Reaction<->106518
phytozome	Sb01g038360	Sb06g001120	neighbouring_reaction_106532<->Reaction<->108334
phytozome	Sb01g038360	Sb06g001120	neighbouring_reaction_108334<->Reaction<->106532
phytozome	Sb01g038360	Sb06g032940	neighbouring_reaction_106518<->Reaction<->109351
[truncated: 11,554 more rows]

## Sheet: PPI from which non-unique inter
Table S5: Detailed description of sorghum PPI data used as an input for pathway netgwork analysis
Source	Target	Interaction
Sb0012s002210	Sb01g010280	neighbouring_reaction_106147<->Reaction<->110535
Sb0012s002210	Sb01g010280	neighbouring_reaction_110535<->Reaction<->106147
Sb0012s002210	Sb03g028080	neighbouring_reaction_106147<->Reaction<->110535
Sb0012s002210	Sb03g028080	neighbouring_reaction_110535<->Reaction<->106147
Sb01g001140	Sb01g007370	neighbouring_reaction_109150<->Reaction<->113126
Sb01g001140	Sb01g007370	neighbouring_reaction_113126<->Reaction<->109150
Sb01g002140	Sb08g003330	neighbouring_reaction_109214<->Reaction<->113602
Sb01g002140	Sb08g003330	neighbouring_reaction_113602<->Reaction<->109214
Sb01g002480	Sb02g004010	neighbouring_reaction_108987<->Reaction<->115776
Sb01g002480	Sb02g004010	neighbouring_reaction_115776<->Reaction<->108987
Sb01g004040	Sb01g007460	indirect_complex_109807
Sb01g004040	Sb01g007460	neighbouring_reaction_109846<->Reaction<->109889
Sb01g004040	Sb01g007460	neighbouring_reaction_109846<->Reaction<->111131
Sb01g004040	Sb01g007460	neighbouring_reaction_109847<->Reaction<->109887
Sb01g004040	Sb01g007460	neighbouring_reaction_109847<->Reaction<->114032
Sb01g004040	Sb01g007460	neighbouring_reaction_109887<->Reaction<->109847
Sb01g004040	Sb01g007460	neighbouring_reaction_109887<->Reaction<->113594
Sb01g004040	Sb01g007460	neighbouring_reaction_109887<->Reaction<->113595
Sb01g004040	Sb01g007460	neighbouring_reaction_109889<->Reaction<->109846
Sb01g004040	Sb01g007460	neighbouring_reaction_109889<->Reaction<->113594
Sb01g004040	Sb01g007460	neighbouring_reaction_109889<->Reaction<->113595
Sb01g004040	Sb01g007460	neighbouring_reaction_111131<->Reaction<->109846
Sb01g004040	Sb01g007460	neighbouring_reaction_113594<->Reaction<->109887
Sb01g004040	Sb01g007460	neighbouring_reaction_113594<->Reaction<->109889
Sb01g004040	Sb01g007460	neighbouring_reaction_113595<->Reaction<->109887
Sb01g004040	Sb01g007460	neighbouring_reaction_113595<->Reaction<->109889
Sb01g004040	Sb01g007460	neighbouring_reaction_114032<->Reaction<->109847
Sb01g004040	Sb01g007460	neighbouring_reaction_114032<->Reaction<->114246
Sb01g004040	Sb01g007460	neighbouring_reaction_114243<->Reaction<->114245
Sb01g004040	Sb01g007460	neighbouring_reaction_114244<->Reaction<->114245
Sb01g004040	Sb01g007460	neighbouring_reaction_114245<->Reaction<->114243
Sb01g004040	Sb01g007460	neighbouring_reaction_114245<->Reaction<->114244
Sb01g004040	Sb01g007460	neighbouring_reaction_114246<->Reaction<->114032
Sb01g004040	Sb01g007460	reaction_114245
Sb01g004040	Sb01g032360	indirect_complex_109813
Sb01g004040	Sb01g032360	neighbouring_reaction_109846<->Reaction<->109889
Sb01g004040	Sb01g032360	neighbouring_reaction_109846<->Reaction<->111131
Sb01g004040	Sb01g032360	neighbouring_reaction_109847<->Reaction<->109887
Sb01g004040	Sb01g032360	neighbouring_reaction_109847<->Reaction<->114032
Sb01g004040	Sb01g032360	neighbouring_reaction_109887<->Reaction<->109847
Sb01g004040	Sb01g032360	neighbouring_reaction_109887<->Reaction<->113594
Sb01g004040	Sb01g032360	neighbouring_reaction_109887<->Reaction<->113595
Sb01g004040	Sb01g032360	neighbouring_reaction_109889<->Reaction<->109846
Sb01g004040	Sb01g032360	neighbouring_reaction_109889<->Reaction<->113594
Sb01g004040	Sb01g032360	neighbouring_reaction_109889<->Reaction<->113595
Sb01g004040	Sb01g032360	neighbouring_reaction_111131<->Reaction<->109846
Sb01g004040	Sb01g032360	neighbouring_reaction_113594<->Reaction<->109887
Sb01g004040	Sb01g032360	neighbouring_reaction_113594<->Reaction<->109889
Sb01g004040	Sb01g032360	neighbouring_reaction_113595<->Reaction<->109887
Sb01g004040	Sb01g032360	neighbouring_reaction_113595<->Reaction<->109889
Sb01g004040	Sb01g032360	neighbouring_reaction_114032<->Reaction<->109847
Sb01g004040	Sb01g032360	neighbouring_reaction_114032<->Reaction<->114246
Sb01g004040	Sb01g032360	neighbouring_reaction_114246<->Reaction<->114032
Sb01g004040	Sb01g032360	reaction_114032
Sb01g004040	Sb02g043990	neighbouring_reaction_109846<->Reaction<->111835
Sb01g004040	Sb02g043990	neighbouring_reaction_111835<->Reaction<->109846
Sb01g004040	Sb03g002410	neighbouring_reaction_109846<->Reaction<->111835
Sb01g004040	Sb03g002410	neighbouring_reaction_111835<->Reaction<->109846
Sb01g004040	Sb03g024490	indirect_complex_109839
Sb01g004040	Sb03g024490	indirect_complex_109888
Sb01g004040	Sb03g024490	neighbouring_reaction_109846<->Reaction<->109889
Sb01g004040	Sb03g024490	neighbouring_reaction_109846<->Reaction<->111131
Sb01g004040	Sb03g024490	neighbouring_reaction_109846<->Reaction<->111835
Sb01g004040	Sb03g024490	neighbouring_reaction_109887<->Reaction<->113594
Sb01g004040	Sb03g024490	neighbouring_reaction_109887<->Reaction<->113595
Sb01g004040	Sb03g024490	neighbouring_reaction_109889<->Reaction<->109846
Sb01g004040	Sb03g024490	neighbouring_reaction_109889<->Reaction<->113594
Sb01g004040	Sb03g024490	neighbouring_reaction_109889<->Reaction<->113595
Sb01g004040	Sb03g024490	neighbouring_reaction_111131<->Reaction<->109846
Sb01g004040	Sb03g024490	neighbouring_reaction_111835<->Reaction<->109846
Sb01g004040	Sb03g024490	neighbouring_reaction_113594<->Reaction<->109887
Sb01g004040	Sb03g024490	neighbouring_reaction_113594<->Reaction<->109889
Sb01g004040	Sb03g024490	neighbouring_reaction_113595<->Reaction<->109887
Sb01g004040	Sb03g024490	neighbouring_reaction_113595<->Reaction<->109889
Sb01g004040	Sb03g024490	reaction_113594
Sb01g004040	Sb04g036050	indirect_complex_109839
Sb01g004040	Sb04g036050	indirect_complex_109888
Sb01g004040	Sb04g036050	neighbouring_reaction_109846<->Reaction<->109889
Sb01g004040	Sb04g036050	neighbouring_reaction_109846<->Reaction<->111131
Sb01g004040	Sb04g036050	neighbouring_reaction_109846<->Reaction<->111835
Sb01g004040	Sb04g036050	neighbouring_reaction_109887<->Reaction<->113594
Sb01g004040	Sb04g036050	neighbouring_reaction_109887<->Reaction<->113595
Sb01g004040	Sb04g036050	neighbouring_reaction_109889<->Reaction<->109846
Sb01g004040	Sb04g036050	neighbouring_reaction_109889<->Reaction<->113594
Sb01g004040	Sb04g036050	neighbouring_reaction_109889<->Reaction<->113595
Sb01g004040	Sb04g036050	neighbouring_reaction_111131<->Reaction<->109846
Sb01g004040	Sb04g036050	neighbouring_reaction_111835<->Reaction<->109846
Sb01g004040	Sb04g036050	neighbouring_reaction_113594<->Reaction<->109887
Sb01g004040	Sb04g036050	neighbouring_reaction_113594<->Reaction<->109889
Sb01g004040	Sb04g036050	neighbouring_reaction_113595<->Reaction<->109887
Sb01g004040	Sb04g036050	neighbouring_reaction_113595<->Reaction<->109889
Sb01g004040	Sb04g036050	reaction_113594
Sb01g004040	Sb06g017330	indirect_complex_109839
Sb01g004040	Sb06g017330	indirect_complex_109888
Sb01g004040	Sb06g017330	neighbouring_reaction_109846<->Reaction<->109889
Sb01g004040	Sb06g017330	neighbouring_reaction_109846<->Reaction<->111131
Sb01g004040	Sb06g017330	neighbouring_reaction_109846<->Reaction<->111835
Sb01g004040	Sb06g017330	neighbouring_reaction_109887<->Reaction<->113594
Sb01g004040	Sb06g017330	neighbouring_reaction_109887<->Reaction<->113595
Sb01g004040	Sb06g017330	neighbouring_reaction_109889<->Reaction<->109846
Sb01g004040	Sb06g017330	neighbouring_reaction_109889<->Reaction<->113594
Sb01g004040	Sb06g017330	neighbouring_reaction_109889<->Reaction<->113595
Sb01g004040	Sb06g017330	neighbouring_reaction_111131<->Reaction<->109846
Sb01g004040	Sb06g017330	neighbouring_reaction_111835<->Reaction<->109846
Sb01g004040	Sb06g017330	neighbouring_reaction_113594<->Reaction<->109887
Sb01g004040	Sb06g017330	neighbouring_reaction_113594<->Reaction<->109889
Sb01g004040	Sb06g017330	neighbouring_reaction_113595<->Reaction<->109887
Sb01g004040	Sb06g017330	neighbouring_reaction_113595<->Reaction<->109889
Sb01g004040	Sb06g017330	reaction_113594
Sb01g004040	Sb06g033210	neighbouring_reaction_109846<->Reaction<->111835
Sb01g004040	Sb06g033210	neighbouring_reaction_111835<->Reaction<->109846
Sb01g004040	Sb06g033210	neighbouring_reaction_109846<->Reaction<->111835
Sb01g004040	Sb06g033210	neighbouring_reaction_111835<->Reaction<->109846
Sb01g004040	Sb07g022680	neighbouring_reaction_111129<->Reaction<->111131
Sb01g004040	Sb07g022680	neighbouring_reaction_111131<->Reaction<->111129
Sb01g004040	Sb08g018160	indirect_complex_109839
Sb01g004040	Sb08g018160	indirect_complex_109888
Sb01g004040	Sb08g018160	neighbouring_reaction_109846<->Reaction<->109889
Sb01g004040	Sb08g018160	neighbouring_reaction_109846<->Reaction<->111131
Sb01g004040	Sb08g018160	neighbouring_reaction_109846<->Reaction<->111835
Sb01g004040	Sb08g018160	neighbouring_reaction_109887<->Reaction<->113594
Sb01g004040	Sb08g018160	neighbouring_reaction_109887<->Reaction<->113595
Sb01g004040	Sb08g018160	neighbouring_reaction_109889<->Reaction<->109846
Sb01g004040	Sb08g018160	neighbouring_reaction_109889<->Reaction<->113594
Sb01g004040	Sb08g018160	neighbouring_reaction_109889<->Reaction<->113595
Sb01g004040	Sb08g018160	neighbouring_reaction_111131<->Reaction<->109846
Sb01g004040	Sb08g018160	neighbouring_reaction_111835<->Reaction<->109846
Sb01g004040	Sb08g018160	neighbouring_reaction_113594<->Reaction<->109887
Sb01g004040	Sb08g018160	neighbouring_reaction_113594<->Reaction<->109889
Sb01g004040	Sb08g018160	neighbouring_reaction_113595<->Reaction<->109887
Sb01g004040	Sb08g018160	neighbouring_reaction_113595<->Reaction<->109889
Sb01g004040	Sb08g018160	reaction_113594
Sb01g004040	Sb08g021650	indirect_complex_109804
Sb01g004040	Sb08g021650	neighbouring_reaction_109846<->Reaction<->109889
Sb01g004040	Sb08g021650	neighbouring_reaction_109846<->Reaction<->111131
Sb01g004040	Sb08g021650	neighbouring_reaction_109847<->Reaction<->109887
Sb01g004040	Sb08g021650	neighbouring_reaction_109847<->Reaction<->114032
Sb01g004040	Sb08g021650	neighbouring_reaction_109887<->Reaction<->109847
Sb01g004040	Sb08g021650	neighbouring_reaction_109887<->Reaction<->113594
Sb01g004040	Sb08g021650	neighbouring_reaction_109887<->Reaction<->113595
Sb01g004040	Sb08g021650	neighbouring_reaction_109889<->Reaction<->109846
Sb01g004040	Sb08g021650	neighbouring_reaction_109889<->Reaction<->113594
Sb01g004040	Sb08g021650	neighbouring_reaction_109889<->Reaction<->113595
Sb01g004040	Sb08g021650	neighbouring_reaction_111131<->Reaction<->109846
Sb01g004040	Sb08g021650	neighbouring_reaction_113594<->Reaction<->109887
Sb01g004040	Sb08g021650	neighbouring_reaction_113594<->Reaction<->109889
Sb01g004040	Sb08g021650	neighbouring_reaction_113595<->Reaction<->109887
Sb01g004040	Sb08g021650	neighbouring_reaction_113595<->Reaction<->109889
Sb01g004040	Sb08g021650	neighbouring_reaction_114032<->Reaction<->109847
Sb01g004040	Sb08g021650	neighbouring_reaction_114032<->Reaction<->114246
Sb01g004040	Sb08g021650	neighbouring_reaction_114243<->Reaction<->114245
Sb01g004040	Sb08g021650	neighbouring_reaction_114244<->Reaction<->114245
Sb01g004040	Sb08g021650	neighbouring_reaction_114245<->Reaction<->114243
Sb01g004040	Sb08g021650	neighbouring_reaction_114245<->Reaction<->114244
Sb01g004040	Sb08g021650	neighbouring_reaction_114246<->Reaction<->114032
Sb01g004040	Sb08g021650	reaction_114243
Sb01g004040	Sb09g003270	neighbouring_reaction_109846<->Reaction<->111835
Sb01g004040	Sb09g003270	neighbouring_reaction_111835<->Reaction<->109846
Sb01g004040	Sb09g008010	indirect_complex_109839
Sb01g004040	Sb09g008010	indirect_complex_109888
Sb01g004040	Sb09g008010	neighbouring_reaction_109846<->Reaction<->109889
Sb01g004040	Sb09g008010	neighbouring_reaction_109846<->Reaction<->111131
Sb01g004040	Sb09g008010	neighbouring_reaction_109846<->Reaction<->111835
Sb01g004040	Sb09g008010	neighbouring_reaction_109887<->Reaction<->113594
Sb01g004040	Sb09g008010	neighbouring_reaction_109887<->Reaction<->113595
Sb01g004040	Sb09g008010	neighbouring_reaction_109889<->Reaction<->109846
Sb01g004040	Sb09g008010	neighbouring_reaction_109889<->Reaction<->113594
Sb01g004040	Sb09g008010	neighbouring_reaction_109889<->Reaction<->113595
Sb01g004040	Sb09g008010	neighbouring_reaction_111131<->Reaction<->109846
Sb01g004040	Sb09g008010	neighbouring_reaction_111835<->Reaction<->109846
Sb01g004040	Sb09g008010	neighbouring_reaction_113594<->Reaction<->109887
Sb01g004040	Sb09g008010	neighbouring_reaction_113594<->Reaction<->109889
Sb01g004040	Sb09g008010	neighbouring_reaction_113595<->Reaction<->109887
Sb01g004040	Sb09g008010	neighbouring_reaction_113595<->Reaction<->109889
Sb01g004040	Sb09g008010	reaction_113594
Sb01g004040	Sb09g022830	indirect_complex_109844
Sb01g004040	Sb09g022830	neighbouring_reaction_109846<->Reaction<->109889
Sb01g004040	Sb09g022830	neighbouring_reaction_109846<->Reaction<->111131
Sb01g004040	Sb09g022830	neighbouring_reaction_109846<->Reaction<->111835
Sb01g004040	Sb09g022830	neighbouring_reaction_109887<->Reaction<->113595
Sb01g004040	Sb09g022830	neighbouring_reaction_109889<->Reaction<->109846
Sb01g004040	Sb09g022830	neighbouring_reaction_109889<->Reaction<->113594
Sb01g004040	Sb09g022830	neighbouring_reaction_109889<->Reaction<->113595
Sb01g004040	Sb09g022830	neighbouring_reaction_111131<->Reaction<->109846
Sb01g004040	Sb09g022830	neighbouring_reaction_111835<->Reaction<->109846
Sb01g004040	Sb09g022830	neighbouring_reaction_113594<->Reaction<->109889
Sb01g004040	Sb09g022830	neighbouring_reaction_113595<->Reaction<->109887
Sb01g004040	Sb09g022830	neighbouring_reaction_113595<->Reaction<->109889
Sb01g004040	Sb09g022830	reaction_113595
Sb01g004040	Sb09g023360	indirect_complex_109839
Sb01g004040	Sb09g023360	indirect_complex_109888
Sb01g004040	Sb09g023360	neighbouring_reaction_109846<->Reaction<->109889
Sb01g004040	Sb09g023360	neighbouring_reaction_109846<->Reaction<->111131
Sb01g004040	Sb09g023360	neighbouring_reaction_109846<->Reaction<->111835
Sb01g004040	Sb09g023360	neighbouring_reaction_109887<->Reaction<->113594
Sb01g004040	Sb09g023360	neighbouring_reaction_109887<->Reaction<->113595
Sb01g004040	Sb09g023360	neighbouring_reaction_109889<->Reaction<->109846
Sb01g004040	Sb09g023360	neighbouring_reaction_109889<->Reaction<->113594
Sb01g004040	Sb09g023360	neighbouring_reaction_109889<->Reaction<->113595
Sb01g004040	Sb09g023360	neighbouring_reaction_111131<->Reaction<->109846
Sb01g004040	Sb09g023360	neighbouring_reaction_111835<->Reaction<->109846
Sb01g004040	Sb09g023360	neighbouring_reaction_113594<->Reaction<->109887
Sb01g004040	Sb09g023360	neighbouring_reaction_113594<->Reaction<->109889
Sb01g004040	Sb09g023360	neighbouring_reaction_113595<->Reaction<->109887
Sb01g004040	Sb09g023360	neighbouring_reaction_113595<->Reaction<->109889
Sb01g004040	Sb09g023360	reaction_113594
Sb01g004040	Sb10g007540	indirect_complex_109844
Sb01g004040	Sb10g007540	neighbouring_reaction_109846<->Reaction<->109889
Sb01g004040	Sb10g007540	neighbouring_reaction_109846<->Reaction<->111131
Sb01g004040	Sb10g007540	neighbouring_reaction_109887<->Reaction<->113595
Sb01g004040	Sb10g007540	neighbouring_reaction_109889<->Reaction<->109846
Sb01g004040	Sb10g007540	neighbouring_reaction_109889<->Reaction<->113594
Sb01g004040	Sb10g007540	neighbouring_reaction_109889<->Reaction<->113595
Sb01g004040	Sb10g007540	neighbouring_reaction_111131<->Reaction<->109846
Sb01g004040	Sb10g007540	neighbouring_reaction_113594<->Reaction<->109889
Sb01g004040	Sb10g007540	neighbouring_reaction_113595<->Reaction<->109887
Sb01g004040	Sb10g007540	neighbouring_reaction_113595<->Reaction<->109889
Sb01g004040	Sb10g007540	reaction_113595
Sb01g004810	Sb01g039980	neighbouring_reaction_109558<->Reaction<->114623
Sb01g004810	Sb01g039980	neighbouring_reaction_114623<->Reaction<->109558
Sb01g004810	Sb01g039980	neighbouring_reaction_109558<->Reaction<->114623
Sb01g004810	Sb01g039980	neighbouring_reaction_114623<->Reaction<->109558
Sb01g004810	Sb03g007380	neighbouring_reaction_110619<->Reaction<->114623
Sb01g004810	Sb03g007380	neighbouring_reaction_114623<->Reaction<->110619
Sb01g004810	Sb03g007380	neighbouring_reaction_110619<->Reaction<->114623
Sb01g004810	Sb03g007380	neighbouring_reaction_114623<->Reaction<->110619
Sb01g005084	Sb03g011930	neighbouring_reaction_114270<->Reaction<->114793
Sb01g005084	Sb03g011930	neighbouring_reaction_114793<->Reaction<->114270
Sb01g005084	Sb03g013170	neighbouring_reaction_114270<->Reaction<->114793
Sb01g005084	Sb03g013170	neighbouring_reaction_114793<->Reaction<->114270
Sb01g005084	Sb03g013170	neighbouring_reaction_114270<->Reaction<->114793
Sb01g005084	Sb03g013170	neighbouring_reaction_114793<->Reaction<->114270
Sb01g005084	Sb05g014470	neighbouring_reaction_114743<->Reaction<->114793
Sb01g005084	Sb05g014470	neighbouring_reaction_114793<->Reaction<->114743
Sb01g005084	Sb05g014470	neighbouring_reaction_114743<->Reaction<->114793
Sb01g005084	Sb05g014470	neighbouring_reaction_114793<->Reaction<->114743
Sb01g005084	Sb09g002840	neighbouring_reaction_114270<->Reaction<->114793
Sb01g005084	Sb09g002840	neighbouring_reaction_114793<->Reaction<->114270
Sb01g005600	Sb01g045530	direct_complex_113436
Sb01g005600	Sb01g045530	neighbouring_reaction_113439<->Reaction<->114724
Sb01g005600	Sb01g045530	neighbouring_reaction_113439<->Reaction<->114725
Sb01g005600	Sb01g045530	neighbouring_reaction_114724<->Reaction<->113439
Sb01g005600	Sb01g045530	neighbouring_reaction_114725<->Reaction<->113439
Sb01g005600	Sb04g034710	direct_complex_113436
Sb01g005600	Sb04g034710	neighbouring_reaction_113439<->Reaction<->114724
Sb01g005600	Sb04g034710	neighbouring_reaction_113439<->Reaction<->114725
Sb01g005600	Sb04g034710	neighbouring_reaction_114724<->Reaction<->113439
Sb01g005600	Sb04g034710	neighbouring_reaction_114725<->Reaction<->113439
Sb01g005600	Sb08g004780	direct_complex_113436
Sb01g005600	Sb08g004780	neighbouring_reaction_113439<->Reaction<->114724
Sb01g005600	Sb08g004780	neighbouring_reaction_113439<->Reaction<->114725
Sb01g005600	Sb08g004780	neighbouring_reaction_114724<->Reaction<->113439
Sb01g005600	Sb08g004780	neighbouring_reaction_114725<->Reaction<->113439
Sb01g005600	Sb01g045530	direct_complex_113436
Sb01g005600	Sb01g045530	neighbouring_reaction_113439<->Reaction<->114724
Sb01g005600	Sb01g045530	neighbouring_reaction_113439<->Reaction<->114725
Sb01g005600	Sb01g045530	neighbouring_reaction_114724<->Reaction<->113439
Sb01g005600	Sb01g045530	neighbouring_reaction_114725<->Reaction<->113439
Sb01g005600	Sb04g034710	direct_complex_113436
Sb01g005600	Sb04g034710	neighbouring_reaction_113439<->Reaction<->114724
Sb01g005600	Sb04g034710	neighbouring_reaction_113439<->Reaction<->114725
Sb01g005600	Sb04g034710	neighbouring_reaction_114724<->Reaction<->113439
Sb01g005600	Sb04g034710	neighbouring_reaction_114725<->Reaction<->113439
Sb01g005600	Sb08g004780	direct_complex_113436
Sb01g005600	Sb08g004780	neighbouring_reaction_113439<->Reaction<->114724
Sb01g005600	Sb08g004780	neighbouring_reaction_113439<->Reaction<->114725
Sb01g005600	Sb08g004780	neighbouring_reaction_114724<->Reaction<->113439
Sb01g005600	Sb08g004780	neighbouring_reaction_114725<->Reaction<->113439
Sb01g006190	Sb01g010660	direct_complex_114552
Sb01g006190	Sb01g010660	reaction_114553
Sb01g006190	Sb01g013843	neighbouring_reaction_114523<->Reaction<->114549
Sb01g006190	Sb01g013843	neighbouring_reaction_114549<->Reaction<->114523
Sb01g006190	Sb01g029000	direct_complex_114546
Sb01g006190	Sb01g029000	reaction_114547
Sb01g006190	Sb02g002760	neighbouring_reaction_114523<->Reaction<->114549
Sb01g006190	Sb02g002760	neighbouring_reaction_114549<->Reaction<->114523
Sb01g006190	Sb04g026190	direct_complex_114554
Sb01g006190	Sb04g026190	reaction_114555
Sb01g006190	Sb06g024480	direct_complex_114546
Sb01g006190	Sb06g024480	reaction_114547
Sb01g006480	Sb01g039980	neighbouring_reaction_108588<->Reaction<->109558
Sb01g006480	Sb01g039980	neighbouring_reaction_109558<->Reaction<->108588
Sb01g006480	Sb01g039980	neighbouring_reaction_108588<->Reaction<->109558
Sb01g006480	Sb01g039980	neighbouring_reaction_109558<->Reaction<->108588
Sb01g006480	Sb06g004280	neighbouring_reaction_108588<->Reaction<->109584
Sb01g006480	Sb06g004280	neighbouring_reaction_109584<->Reaction<->108588
Sb01g006480	Sb09g005230	neighbouring_reaction_108588<->Reaction<->109584
Sb01g006480	Sb09g005230	neighbouring_reaction_109584<->Reaction<->108588
Sb01g006480	Sb10g002220	neighbouring_reaction_108588<->Reaction<->109584
Sb01g006480	Sb10g002220	neighbouring_reaction_109584<->Reaction<->108588
Sb01g006480	Sb10g002250	neighbouring_reaction_108588<->Reaction<->109584
Sb01g006480	Sb10g002250	neighbouring_reaction_109584<->Reaction<->108588
Sb01g006480	Sb01g039980	neighbouring_reaction_108588<->Reaction<->109558
Sb01g006480	Sb01g039980	neighbouring_reaction_109558<->Reaction<->108588
Sb01g006480	Sb01g039980	neighbouring_reaction_108588<->Reaction<->109558
Sb01g006480	Sb01g039980	neighbouring_reaction_109558<->Reaction<->108588
Sb01g006480	Sb06g004280	neighbouring_reaction_108588<->Reaction<->109584
Sb01g006480	Sb06g004280	neighbouring_reaction_109584<->Reaction<->108588
Sb01g006480	Sb09g005230	neighbouring_reaction_108588<->Reaction<->109584
Sb01g006480	Sb09g005230	neighbouring_reaction_109584<->Reaction<->108588
Sb01g006480	Sb10g002220	neighbouring_reaction_108588<->Reaction<->109584
Sb01g006480	Sb10g002220	neighbouring_reaction_109584<->Reaction<->108588
Sb01g006480	Sb10g002250	neighbouring_reaction_108588<->Reaction<->109584
Sb01g006480	Sb10g002250	neighbouring_reaction_109584<->Reaction<->108588
Sb01g006490	Sb02g037420	neighbouring_reaction_112032<->Reaction<->115439
Sb01g006490	Sb02g037420	neighbouring_reaction_112887<->Reaction<->115439
Sb01g006490	Sb02g037420	neighbouring_reaction_115439<->Reaction<->112032
Sb01g006490	Sb02g037420	neighbouring_reaction_115439<->Reaction<->112887
Sb01g007230	Sb02g001140	neighbouring_reaction_107455<->Reaction<->110267
Sb01g007230	Sb02g001140	neighbouring_reaction_110267<->Reaction<->107455
Sb01g007230	Sb02g001140	neighbouring_reaction_110267<->Reaction<->114954
Sb01g007230	Sb02g001140	neighbouring_reaction_114954<->Reaction<->110267
Sb01g007370	Sb06g026060	neighbouring_reaction_113126<->Reaction<->113133
Sb01g007370	Sb06g026060	neighbouring_reaction_113133<->Reaction<->113126
Sb01g007370	Sb10g026260	neighbouring_reaction_113126<->Reaction<->113133
Sb01g007370	Sb10g026260	neighbouring_reaction_113133<->Reaction<->113126
Sb01g007460	Sb01g032360	indirect_complex_109813
Sb01g007460	Sb01g032360	neighbouring_reaction_109846<->Reaction<->109889
Sb01g007460	Sb01g032360	neighbouring_reaction_109846<->Reaction<->111131
Sb01g007460	Sb01g032360	neighbouring_reaction_109847<->Reaction<->109887
Sb01g007460	Sb01g032360	neighbouring_reaction_109847<->Reaction<->114032
Sb01g007460	Sb01g032360	neighbouring_reaction_109887<->Reaction<->109847
Sb01g007460	Sb01g032360	neighbouring_reaction_109887<->Reaction<->113594
Sb01g007460	Sb01g032360	neighbouring_reaction_109887<->Reaction<->113595
Sb01g007460	Sb01g032360	neighbouring_reaction_109889<->Reaction<->109846
Sb01g007460	Sb01g032360	neighbouring_reaction_109889<->Reaction<->113594
Sb01g007460	Sb01g032360	neighbouring_reaction_109889<->Reaction<->113595
Sb01g007460	Sb01g032360	neighbouring_reaction_111131<->Reaction<->109846
Sb01g007460	Sb01g032360	neighbouring_reaction_113594<->Reaction<->109887
Sb01g007460	Sb01g032360	neighbouring_reaction_113594<->Reaction<->109889
Sb01g007460	Sb01g032360	neighbouring_reaction_113595<->Reaction<->109887
Sb01g007460	Sb01g032360	neighbouring_reaction_113595<->Reaction<->109889
Sb01g007460	Sb01g032360	neighbouring_reaction_114032<->Reaction<->109847
Sb01g007460	Sb01g032360	neighbouring_reaction_114032<->Reaction<->114246
Sb01g007460	Sb01g032360	neighbouring_reaction_114246<->Reaction<->114032
Sb01g007460	Sb01g032360	reaction_114032
Sb01g007460	Sb02g043990	neighbouring_reaction_109846<->Reaction<->111835
Sb01g007460	Sb02g043990	neighbouring_reaction_111835<->Reaction<->109846
Sb01g007460	Sb03g002410	neighbouring_reaction_109846<->Reaction<->111835
Sb01g007460	Sb03g002410	neighbouring_reaction_111835<->Reaction<->109846
Sb01g007460	Sb03g024490	indirect_complex_109839
Sb01g007460	Sb03g024490	indirect_complex_109888
Sb01g007460	Sb03g024490	neighbouring_reaction_109846<->Reaction<->109889
Sb01g007460	Sb03g024490	neighbouring_reaction_109846<->Reaction<->111131
Sb01g007460	Sb03g024490	neighbouring_reaction_109846<->Reaction<->111835
Sb01g007460	Sb03g024490	neighbouring_reaction_109887<->Reaction<->113594
Sb01g007460	Sb03g024490	neighbouring_reaction_109887<->Reaction<->113595
Sb01g007460	Sb03g024490	neighbouring_reaction_109889<->Reaction<->109846
Sb01g007460	Sb03g024490	neighbouring_reaction_109889<->Reaction<->113594
Sb01g007460	Sb03g024490	neighbouring_reaction_109889<->Reaction<->113595
Sb01g007460	Sb03g024490	neighbouring_reaction_111131<->Reaction<->109846
Sb01g007460	Sb03g024490	neighbouring_reaction_111835<->Reaction<->109846
Sb01g007460	Sb03g024490	neighbouring_reaction_113594<->Reaction<->109887
Sb01g007460	Sb03g024490	neighbouring_reaction_113594<->Reaction<->109889
Sb01g007460	Sb03g024490	neighbouring_reaction_113595<->Reaction<->109887
Sb01g007460	Sb03g024490	neighbouring_reaction_113595<->Reaction<->109889
Sb01g007460	Sb03g024490	reaction_113594
Sb01g007460	Sb04g036050	indirect_complex_109839
Sb01g007460	Sb04g036050	indirect_complex_109888
Sb01g007460	Sb04g036050	neighbouring_reaction_109846<->Reaction<->109889
Sb01g007460	Sb04g036050	neighbouring_reaction_109846<->Reaction<->111131
Sb01g007460	Sb04g036050	neighbouring_reaction_109846<->Reaction<->111835
Sb01g007460	Sb04g036050	neighbouring_reaction_109887<->Reaction<->113594
Sb01g007460	Sb04g036050	neighbouring_reaction_109887<->Reaction<->113595
Sb01g007460	Sb04g036050	neighbouring_reaction_109889<->Reaction<->109846
Sb01g007460	Sb04g036050	neighbouring_reaction_109889<->Reaction<->113594
Sb01g007460	Sb04g036050	neighbouring_reaction_109889<->Reaction<->113595
Sb01g007460	Sb04g036050	neighbouring_reaction_111131<->Reaction<->109846
Sb01g007460	Sb04g036050	neighbouring_reaction_111835<->Reaction<->109846
Sb01g007460	Sb04g036050	neighbouring_reaction_113594<->Reaction<->109887
Sb01g007460	Sb04g036050	neighbouring_reaction_113594<->Reaction<->109889
Sb01g007460	Sb04g036050	neighbouring_reaction_113595<->Reaction<->109887
Sb01g007460	Sb04g036050	neighbouring_reaction_113595<->Reaction<->109889
Sb01g007460	Sb04g036050	reaction_113594
Sb01g007460	Sb06g017330	indirect_complex_109839
Sb01g007460	Sb06g017330	indirect_complex_109888
Sb01g007460	Sb06g017330	neighbouring_reaction_109846<->Reaction<->109889
Sb01g007460	Sb06g017330	neighbouring_reaction_109846<->Reaction<->111131
Sb01g007460	Sb06g017330	neighbouring_reaction_109846<->Reaction<->111835
Sb01g007460	Sb06g017330	neighbouring_reaction_109887<->Reaction<->113594
Sb01g007460	Sb06g017330	neighbouring_reaction_109887<->Reaction<->113595
Sb01g007460	Sb06g017330	neighbouring_reaction_109889<->Reaction<->109846
Sb01g007460	Sb06g017330	neighbouring_reaction_109889<->Reaction<->113594
Sb01g007460	Sb06g017330	neighbouring_reaction_109889<->Reaction<->113595
Sb01g007460	Sb06g017330	neighbouring_reaction_111131<->Reaction<->109846
Sb01g007460	Sb06g017330	neighbouring_reaction_111835<->Reaction<->109846
Sb01g007460	Sb06g017330	neighbouring_reaction_113594<->Reaction<->109887
Sb01g007460	Sb06g017330	neighbouring_reaction_113594<->Reaction<->109889
Sb01g007460	Sb06g017330	neighbouring_reaction_113595<->Reaction<->109887
Sb01g007460	Sb06g017330	neighbouring_reaction_113595<->Reaction<->109889
Sb01g007460	Sb06g017330	reaction_113594
Sb01g007460	Sb06g033210	neighbouring_reaction_109846<->Reaction<->111835
Sb01g007460	Sb06g033210	neighbouring_reaction_111835<->Reaction<->109846
Sb01g007460	Sb06g033210	neighbouring_reaction_109846<->Reaction<->111835
Sb01g007460	Sb06g033210	neighbouring_reaction_111835<->Reaction<->109846
Sb01g007460	Sb07g022680	neighbouring_reaction_111129<->Reaction<->111131
Sb01g007460	Sb07g022680	neighbouring_reaction_111131<->Reaction<->111129
Sb01g007460	Sb08g018160	indirect_complex_109839
Sb01g007460	Sb08g018160	indirect_complex_109888
Sb01g007460	Sb08g018160	neighbouring_reaction_109846<->Reaction<->109889
Sb01g007460	Sb08g018160	neighbouring_reaction_109846<->Reaction<->111131
Sb01g007460	Sb08g018160	neighbouring_reaction_109846<->Reaction<->111835
Sb01g007460	Sb08g018160	neighbouring_reaction_109887<->Reaction<->113594
Sb01g007460	Sb08g018160	neighbouring_reaction_109887<->Reaction<->113595
Sb01g007460	Sb08g018160	neighbouring_reaction_109889<->Reaction<->109846
Sb01g007460	Sb08g018160	neighbouring_reaction_109889<->Reaction<->113594
Sb01g007460	Sb08g018160	neighbouring_reaction_109889<->Reaction<->113595
Sb01g007460	Sb08g018160	neighbouring_reaction_111131<->Reaction<->109846
Sb01g007460	Sb08g018160	neighbouring_reaction_111835<->Reaction<->109846
Sb01g007460	Sb08g018160	neighbouring_reaction_113594<->Reaction<->109887
Sb01g007460	Sb08g018160	neighbouring_reaction_113594<->Reaction<->109889
Sb01g007460	Sb08g018160	neighbouring_reaction_113595<->Reaction<->109887
Sb01g007460	Sb08g018160	neighbouring_reaction_113595<->Reaction<->109889
Sb01g007460	Sb08g018160	reaction_113594
Sb01g007460	Sb09g003270	neighbouring_reaction_109846<->Reaction<->111835
Sb01g007460	Sb09g003270	neighbouring_reaction_111835<->Reaction<->109846
Sb01g007460	Sb09g008010	indirect_complex_109839
Sb01g007460	Sb09g008010	indirect_complex_109888
Sb01g007460	Sb09g008010	neighbouring_reaction_109846<->Reaction<->109889
Sb01g007460	Sb09g008010	neighbouring_reaction_109846<->Reaction<->111131
Sb01g007460	Sb09g008010	neighbouring_reaction_109846<->Reaction<->111835
Sb01g007460	Sb09g008010	neighbouring_reaction_109887<->Reaction<->113594
Sb01g007460	Sb09g008010	neighbouring_reaction_109887<->Reaction<->113595
Sb01g007460	Sb09g008010	neighbouring_reaction_109889<->Reaction<->109846
Sb01g007460	Sb09g008010	neighbouring_reaction_109889<->Reaction<->113594
Sb01g007460	Sb09g008010	neighbouring_reaction_109889<->Reaction<->113595
Sb01g007460	Sb09g008010	neighbouring_reaction_111131<->Reaction<->109846
Sb01g007460	Sb09g008010	neighbouring_reaction_111835<->Reaction<->109846
Sb01g007460	Sb09g008010	neighbouring_reaction_113594<->Reaction<->109887
Sb01g007460	Sb09g008010	neighbouring_reaction_113594<->Reaction<->109889
Sb01g007460	Sb09g008010	neighbouring_reaction_113595<->Reaction<->109887
Sb01g007460	Sb09g008010	neighbouring_reaction_113595<->Reaction<->109889
Sb01g007460	Sb09g008010	reaction_113594
Sb01g007460	Sb09g022830	indirect_complex_109844
Sb01g007460	Sb09g022830	neighbouring_reaction_109846<->Reaction<->109889
Sb01g007460	Sb09g022830	neighbouring_reaction_109846<->Reaction<->111131
Sb01g007460	Sb09g022830	neighbouring_reaction_109846<->Reaction<->111835
Sb01g007460	Sb09g022830	neighbouring_reaction_109887<->Reaction<->113595
Sb01g007460	Sb09g022830	neighbouring_reaction_109889<->Reaction<->109846
Sb01g007460	Sb09g022830	neighbouring_reaction_109889<->Reaction<->113594
Sb01g007460	Sb09g022830	neighbouring_reaction_109889<->Reaction<->113595
Sb01g007460	Sb09g022830	neighbouring_reaction_111131<->Reaction<->109846
Sb01g007460	Sb09g022830	neighbouring_reaction_111835<->Reaction<->109846
Sb01g007460	Sb09g022830	neighbouring_reaction_113594<->Reaction<->109889
Sb01g007460	Sb09g022830	neighbouring_reaction_113595<->Reaction<->109887
Sb01g007460	Sb09g022830	neighbouring_reaction_113595<->Reaction<->109889
Sb01g007460	Sb09g022830	reaction_113595
Sb01g007460	Sb09g023360	indirect_complex_109839
Sb01g007460	Sb09g023360	indirect_complex_109888
Sb01g007460	Sb09g023360	neighbouring_reaction_109846<->Reaction<->109889
Sb01g007460	Sb09g023360	neighbouring_reaction_109846<->Reaction<->111131
Sb01g007460	Sb09g023360	neighbouring_reaction_109846<->Reaction<->111835
Sb01g007460	Sb09g023360	neighbouring_reaction_109887<->Reaction<->113594
Sb01g007460	Sb09g023360	neighbouring_reaction_109887<->Reaction<->113595
Sb01g007460	Sb09g023360	neighbouring_reaction_109889<->Reaction<->109846
Sb01g007460	Sb09g023360	neighbouring_reaction_109889<->Reaction<->113594
Sb01g007460	Sb09g023360	neighbouring_reaction_109889<->Reaction<->113595
Sb01g007460	Sb09g023360	neighbouring_reaction_111131<->Reaction<->109846
Sb01g007460	Sb09g023360	neighbouring_reaction_111835<->Reaction<->109846
Sb01g007460	Sb09g023360	neighbouring_reaction_113594<->Reaction<->109887
Sb01g007460	Sb09g023360	neighbouring_reaction_113594<->Reaction<->109889
Sb01g007460	Sb09g023360	neighbouring_reaction_113595<->Reaction<->109887
Sb01g007460	Sb09g023360	neighbouring_reaction_113595<->Reaction<->109889
Sb01g007460	Sb09g023360	reaction_113594
Sb01g007460	Sb10g007540	indirect_complex_109844
Sb01g007460	Sb10g007540	neighbouring_reaction_109846<->Reaction<->109889
Sb01g007460	Sb10g007540	neighbouring_reaction_109846<->Reaction<->111131
Sb01g007460	Sb10g007540	neighbouring_reaction_109887<->Reaction<->113595
Sb01g007460	Sb10g007540	neighbouring_reaction_109889<->Reaction<->109846
Sb01g007460	Sb10g007540	neighbouring_reaction_109889<->Reaction<->113594
Sb01g007460	Sb10g007540	neighbouring_reaction_109889<->Reaction<->113595
Sb01g007460	Sb10g007540	neighbouring_reaction_111131<->Reaction<->109846
Sb01g007460	Sb10g007540	neighbouring_reaction_113594<->Reaction<->109889
Sb01g007460	Sb10g007540	neighbouring_reaction_113595<->Reaction<->109887
Sb01g007460	Sb10g007540	neighbouring_reaction_113595<->Reaction<->109889
Sb01g007460	Sb10g007540	reaction_113595
Sb01g007560	Sb01g021190	neighbouring_reaction_115006<->Reaction<->115687
Sb01g007560	Sb01g021190	neighbouring_reaction_115687<->Reaction<->115006
Sb01g007560	Sb02g042100	neighbouring_reaction_112626<->Reaction<->113555
Sb01g007560	Sb02g042100	neighbouring_reaction_113555<->Reaction<->112626
Sb01g007560	Sb03g032830	neighbouring_reaction_113406<->Reaction<->115012
Sb01g007560	Sb03g032830	neighbouring_reaction_115012<->Reaction<->113406
Sb01g007560	Sb04g028060	neighbouring_reaction_115006<->Reaction<->115687
Sb01g007560	Sb04g028060	neighbouring_reaction_115687<->Reaction<->115006
Sb01g007560	Sb10g008200	neighbouring_reaction_115006<->Reaction<->115687
Sb01g007560	Sb10g008200	neighbouring_reaction_115687<->Reaction<->115006
Sb01g007560	Sb01g021190	neighbouring_reaction_115006<->Reaction<->115687
Sb01g007560	Sb01g021190	neighbouring_reaction_115687<->Reaction<->115006
Sb01g007560	Sb02g042100	neighbouring_reaction_112626<->Reaction<->113555
Sb01g007560	Sb02g042100	neighbouring_reaction_113555<->Reaction<->112626
Sb01g007560	Sb03g032830	neighbouring_reaction_113406<->Reaction<->115012
Sb01g007560	Sb03g032830	neighbouring_reaction_115012<->Reaction<->113406
Sb01g007560	Sb04g028060	neighbouring_reaction_115006<->Reaction<->115687
Sb01g007560	Sb04g028060	neighbouring_reaction_115687<->Reaction<->115006
Sb01g007560	Sb10g008200	neighbouring_reaction_115006<->Reaction<->115687
Sb01g007560	Sb10g008200	neighbouring_reaction_115687<->Reaction<->115006
Sb01g007580	Sb02g030500	neighbouring_reaction_115460<->Reaction<->115602
Sb01g007580	Sb02g030500	neighbouring_reaction_115602<->Reaction<->115460
Sb01g007580	Sb03g047200	neighbouring_reaction_115602<->Reaction<->115647
Sb01g007580	Sb03g047200	neighbouring_reaction_115647<->Reaction<->115602
Sb01g007580	Sb02g030500	neighbouring_reaction_115460<->Reaction<->115602
Sb01g007580	Sb02g030500	neighbouring_reaction_115602<->Reaction<->115460
Sb01g007580	Sb03g047200	neighbouring_reaction_115602<->Reaction<->115647
Sb01g007580	Sb03g047200	neighbouring_reaction_115647<->Reaction<->115602
Sb01g007580	Sb02g030500	neighbouring_reaction_115460<->Reaction<->115602
Sb01g007580	Sb02g030500	neighbouring_reaction_115602<->Reaction<->115460
Sb01g007580	Sb03g047200	neighbouring_reaction_115602<->Reaction<->115647
Sb01g007580	Sb03g047200	neighbouring_reaction_115647<->Reaction<->115602
Sb01g007580	Sb02g030500	neighbouring_reaction_115460<->Reaction<->115602
Sb01g007580	Sb02g030500	neighbouring_reaction_115602<->Reaction<->115460
Sb01g007580	Sb03g047200	neighbouring_reaction_115602<->Reaction<->115647
Sb01g007580	Sb03g047200	neighbouring_reaction_115647<->Reaction<->115602
Sb01g007580	Sb02g030500	neighbouring_reaction_115460<->Reaction<->115602
Sb01g007580	Sb02g030500	neighbouring_reaction_115602<->Reaction<->115460
Sb01g007580	Sb03g047200	neighbouring_reaction_115602<->Reaction<->115647
Sb01g007580	Sb03g047200	neighbouring_reaction_115647<->Reaction<->115602
Sb01g007850	Sb01g006190	direct_complex_114548
Sb01g007850	Sb01g006190	neighbouring_reaction_114523<->Reaction<->114549
Sb01g007850	Sb01g006190	neighbouring_reaction_114549<->Reaction<->114523
Sb01g007850	Sb01g006190	reaction_114549
Sb01g007850	Sb01g009920	neighbouring_reaction_108411<->Reaction<->114532
Sb01g007850	Sb01g009920	neighbouring_reaction_108411<->Reaction<->115253
Sb01g007850	Sb01g009920	neighbouring_reaction_114532<->Reaction<->108411
Sb01g007850	Sb01g009920	neighbouring_reaction_115253<->Reaction<->108411
Sb01g007850	Sb01g009920	neighbouring_reaction_108411<->Reaction<->114532
Sb01g007850	Sb01g009920	neighbouring_reaction_108411<->Reaction<->115253
Sb01g007850	Sb01g009920	neighbouring_reaction_114532<->Reaction<->108411
Sb01g007850	Sb01g009920	neighbouring_reaction_115253<->Reaction<->108411
Sb01g007850	Sb01g013843	direct_complex_114548
Sb01g007850	Sb01g013843	neighbouring_reaction_114523<->Reaction<->114549
Sb01g007850	Sb01g013843	neighbouring_reaction_114549<->Reaction<->114523
Sb01g007850	Sb01g013843	reaction_114549
Sb01g007850	Sb01g037340	neighbouring_reaction_108411<->Reaction<->114532
Sb01g007850	Sb01g037340	neighbouring_reaction_108411<->Reaction<->115253
Sb01g007850	Sb01g037340	neighbouring_reaction_114532<->Reaction<->108411
Sb01g007850	Sb01g037340	neighbouring_reaction_115253<->Reaction<->108411
Sb01g007850	Sb02g002760	direct_complex_114548
Sb01g007850	Sb02g002760	neighbouring_reaction_114523<->Reaction<->114549
Sb01g007850	Sb02g002760	neighbouring_reaction_114549<->Reaction<->114523
Sb01g007850	Sb02g002760	reaction_114549
Sb01g007850	Sb10g010050	direct_complex_114531
Sb01g007850	Sb10g010050	neighbouring_reaction_108411<->Reaction<->114532
Sb01g007850	Sb10g010050	neighbouring_reaction_114532<->Reaction<->108411
Sb01g007850	Sb10g010050	reaction_114532
Sb01g008450	Sb07g026290	neighbouring_reaction_109381<->Reaction<->115055
Sb01g008450	Sb07g026290	neighbouring_reaction_115055<->Reaction<->109381
Sb01g008690	Sb01g043930	neighbouring_reaction_107849<->Reaction<->109244
Sb01g008690	Sb01g043930	neighbouring_reaction_109244<->Reaction<->107849
Sb01g008690	Sb02g028900	neighbouring_reaction_107849<->Reaction<->114892
Sb01g008690	Sb02g028900	neighbouring_reaction_114892<->Reaction<->107849
Sb01g008690	Sb02g028910	neighbouring_reaction_107849<->Reaction<->114892
Sb01g008690	Sb02g028910	neighbouring_reaction_114892<->Reaction<->107849
Sb01g008690	Sb03g009190	neighbouring_reaction_107849<->Reaction<->114892
Sb01g008690	Sb03g009190	neighbouring_reaction_114892<->Reaction<->107849
Sb01g008690	Sb03g012990	neighbouring_reaction_107849<->Reaction<->114892
Sb01g008690	Sb03g012990	neighbouring_reaction_114892<->Reaction<->107849
Sb01g008690	Sb03g013000	neighbouring_reaction_107849<->Reaction<->114892
Sb01g008690	Sb03g013000	neighbouring_reaction_114892<->Reaction<->107849
Sb01g008690	Sb03g046550	neighbouring_reaction_107849<->Reaction<->114892
Sb01g008690	Sb03g046550	neighbouring_reaction_114892<->Reaction<->107849
Sb01g008690	Sb05g016730	neighbouring_reaction_107849<->Reaction<->115077
Sb01g008690	Sb05g016730	neighbouring_reaction_107849<->Reaction<->115079
Sb01g008690	Sb05g016730	neighbouring_reaction_115077<->Reaction<->107849
Sb01g008690	Sb05g016730	neighbouring_reaction_115079<->Reaction<->107849
Sb01g008690	Sb06g029020	neighbouring_reaction_107849<->Reaction<->115081
Sb01g008690	Sb06g029020	neighbouring_reaction_115081<->Reaction<->107849
Sb01g008690	Sb07g028080	neighbouring_reaction_107849<->Reaction<->113328
Sb01g008690	Sb07g028080	neighbouring_reaction_113328<->Reaction<->107849
Sb01g008690	Sb08g003440	neighbouring_reaction_107849<->Reaction<->111953
Sb01g008690	Sb08g003440	neighbouring_reaction_111953<->Reaction<->107849
Sb01g008690	Sb09g003920	neighbouring_reaction_107849<->Reaction<->107850
Sb01g008690	Sb09g003920	neighbouring_reaction_107850<->Reaction<->107849
Sb01g008690	Sb10g000400	neighbouring_reaction_107849<->Reaction<->109061
Sb01g008690	Sb10g000400	neighbouring_reaction_109061<->Reaction<->107849
Sb01g008690	Sb01g043930	neighbouring_reaction_107849<->Reaction<->109244
Sb01g008690	Sb01g043930	neighbouring_reaction_109244<->Reaction<->107849
Sb01g008690	Sb02g028900	neighbouring_reaction_107849<->Reaction<->114892
Sb01g008690	Sb02g028900	neighbouring_reaction_114892<->Reaction<->107849
Sb01g008690	Sb02g028910	neighbouring_reaction_107849<->Reaction<->114892
Sb01g008690	Sb02g028910	neighbouring_reaction_114892<->Reaction<->107849
Sb01g008690	Sb03g009190	neighbouring_reaction_107849<->Reaction<->114892
Sb01g008690	Sb03g009190	neighbouring_reaction_114892<->Reaction<->107849
Sb01g008690	Sb03g012990	neighbouring_reaction_107849<->Reaction<->114892
Sb01g008690	Sb03g012990	neighbouring_reaction_114892<->Reaction<->107849
Sb01g008690	Sb03g013000	neighbouring_reaction_107849<->Reaction<->114892
Sb01g008690	Sb03g013000	neighbouring_reaction_114892<->Reaction<->107849
Sb01g008690	Sb03g046550	neighbouring_reaction_107849<->Reaction<->114892
Sb01g008690	Sb03g046550	neighbouring_reaction_114892<->Reaction<->107849
Sb01g008690	Sb05g016730	neighbouring_reaction_107849<->Reaction<->115077
Sb01g008690	Sb05g016730	neighbouring_reaction_107849<->Reaction<->115079
Sb01g008690	Sb05g016730	neighbouring_reaction_115077<->Reaction<->107849
Sb01g008690	Sb05g016730	neighbouring_reaction_115079<->Reaction<->107849
Sb01g008690	Sb06g029020	neighbouring_reaction_107849<->Reaction<->115081
Sb01g008690	Sb06g029020	neighbouring_reaction_115081<->Reaction<->107849
Sb01g008690	Sb07g028080	neighbouring_reaction_107849<->Reaction<->113328
Sb01g008690	Sb07g028080	neighbouring_reaction_113328<->Reaction<->107849
Sb01g008690	Sb08g003440	neighbouring_reaction_107849<->Reaction<->111953
Sb01g008690	Sb08g003440	neighbouring_reaction_111953<->Reaction<->107849
Sb01g008690	Sb09g003920	neighbouring_reaction_107849<->Reaction<->107850
Sb01g008690	Sb09g003920	neighbouring_reaction_107850<->Reaction<->107849
Sb01g008690	Sb10g000400	neighbouring_reaction_107849<->Reaction<->109061
Sb01g008690	Sb10g000400	neighbouring_reaction_109061<->Reaction<->107849
Sb01g008840	Sb10g030120	direct_complex_114039
Sb01g008840	Sb10g030120	neighbouring_reaction_114040<->Reaction<->114042
Sb01g008840	Sb10g030120	neighbouring_reaction_114042<->Reaction<->114040
Sb01g008840	Sb10g030120	reaction_114040
Sb01g009140	Sb04g025290	neighbouring_reaction_106007<->Reaction<->106585
Sb01g009140	Sb04g025290	neighbouring_reaction_106585<->Reaction<->106007
Sb01g009880	Sb01g015190	neighbouring_reaction_113097<->Reaction<->113134
Sb01g009880	Sb01g015190	neighbouring_reaction_113134<->Reaction<->113097
Sb01g009880	Sb01g038460	neighbouring_reaction_109137<->Reaction<->113134
Sb01g009880	Sb01g038460	neighbouring_reaction_113134<->Reaction<->109137
Sb01g009880	Sb01g038460	neighbouring_reaction_109137<->Reaction<->113134
Sb01g009880	Sb01g038460	neighbouring_reaction_113134<->Reaction<->109137
Sb01g009880	Sb01g038460	neighbouring_reaction_109137<->Reaction<->113134
Sb01g009880	Sb01g038460	neighbouring_reaction_113134<->Reaction<->109137
Sb01g009880	Sb05g000440	neighbouring_reaction_109137<->Reaction<->113134
Sb01g009880	Sb05g000440	neighbouring_reaction_113134<->Reaction<->109137
Sb01g009880	Sb08g008320	neighbouring_reaction_109154<->Reaction<->113134
Sb01g009880	Sb08g008320	neighbouring_reaction_113134<->Reaction<->109154
Sb01g009880	Sb10g009590	neighbouring_reaction_109137<->Reaction<->113134
Sb01g009880	Sb10g009590	neighbouring_reaction_113134<->Reaction<->109137
Sb01g009920	Sb01g006190	direct_complex_114548
Sb01g009920	Sb01g006190	neighbouring_reaction_114523<->Reaction<->114549
Sb01g009920	Sb01g006190	neighbouring_reaction_114549<->Reaction<->114523
Sb01g009920	Sb01g006190	reaction_114549
Sb01g009920	Sb01g013843	direct_complex_114548
Sb01g009920	Sb01g013843	neighbouring_reaction_114523<->Reaction<->114549
Sb01g009920	Sb01g013843	neighbouring_reaction_114549<->Reaction<->114523
Sb01g009920	Sb01g013843	reaction_114549
Sb01g009920	Sb02g002760	direct_complex_114548
Sb01g009920	Sb02g002760	neighbouring_reaction_114523<->Reaction<->114549
Sb01g009920	Sb02g002760	neighbouring_reaction_114549<->Reaction<->114523
Sb01g009920	Sb02g002760	reaction_114549
Sb01g009920	Sb10g010050	direct_complex_114531
Sb01g009920	Sb10g010050	neighbouring_reaction_108411<->Reaction<->114532
Sb01g009920	Sb10g010050	neighbouring_reaction_114532<->Reaction<->108411
Sb01g009920	Sb10g010050	reaction_114532
Sb01g009920	Sb01g006190	direct_complex_114548
Sb01g009920	Sb01g006190	neighbouring_reaction_114523<->Reaction<->114549
Sb01g009920	Sb01g006190	neighbouring_reaction_114549<->Reaction<->114523
Sb01g009920	Sb01g006190	reaction_114549
Sb01g009920	Sb01g013843	direct_complex_114548
Sb01g009920	Sb01g013843	neighbouring_reaction_114523<->Reaction<->114549
Sb01g009920	Sb01g013843	neighbouring_reaction_114549<->Reaction<->114523
Sb01g009920	Sb01g013843	reaction_114549
Sb01g009920	Sb02g002760	direct_complex_114548
Sb01g009920	Sb02g002760	neighbouring_reaction_114523<->Reaction<->114549
Sb01g009920	Sb02g002760	neighbouring_reaction_114549<->Reaction<->114523
Sb01g009920	Sb02g002760	reaction_114549
Sb01g009920	Sb10g010050	direct_complex_114531
Sb01g009920	Sb10g010050	neighbouring_reaction_108411<->Reaction<->114532
Sb01g009920	Sb10g010050	neighbouring_reaction_114532<->Reaction<->108411
Sb01g009920	Sb10g010050	reaction_114532
Sb01g009920	Sb01g006190	direct_complex_114548
Sb01g009920	Sb01g006190	neighbouring_reaction_114523<->Reaction<->114549
Sb01g009920	Sb01g006190	neighbouring_reaction_114549<->Reaction<->114523
Sb01g009920	Sb01g006190	reaction_114549
Sb01g009920	Sb01g007850	neighbouring_reaction_108411<->Reaction<->114532
Sb01g009920	Sb01g007850	neighbouring_reaction_108411<->Reaction<->115253
Sb01g009920	Sb01g007850	neighbouring_reaction_114532<->Reaction<->108411
Sb01g009920	Sb01g007850	neighbouring_reaction_115253<->Reaction<->108411
Sb01g009920	Sb01g009930	neighbouring_reaction_108411<->Reaction<->114532
Sb01g009920	Sb01g009930	neighbouring_reaction_108411<->Reaction<->115253
Sb01g009920	Sb01g009930	neighbouring_reaction_114532<->Reaction<->108411
Sb01g009920	Sb01g009930	neighbouring_reaction_115253<->Reaction<->108411
Sb01g009920	Sb01g013843	direct_complex_114548
Sb01g009920	Sb01g013843	neighbouring_reaction_114523<->Reaction<->114549
Sb01g009920	Sb01g013843	neighbouring_reaction_114549<->Reaction<->114523
Sb01g009920	Sb01g013843	reaction_114549
Sb01g009920	Sb01g037340	neighbouring_reaction_108411<->Reaction<->114532
Sb01g009920	Sb01g037340	neighbouring_reaction_108411<->Reaction<->115253
Sb01g009920	Sb01g037340	neighbouring_reaction_114532<->Reaction<->108411
Sb01g009920	Sb01g037340	neighbouring_reaction_115253<->Reaction<->108411
Sb01g009920	Sb02g002760	direct_complex_114548
Sb01g009920	Sb02g002760	neighbouring_reaction_114523<->Reaction<->114549
Sb01g009920	Sb02g002760	neighbouring_reaction_114549<->Reaction<->114523
Sb01g009920	Sb02g002760	reaction_114549
Sb01g009920	Sb10g010050	direct_complex_114531
Sb01g009920	Sb10g010050	neighbouring_reaction_108411<->Reaction<->114532
Sb01g009920	Sb10g010050	neighbouring_reaction_114532<->Reaction<->108411
Sb01g009920	Sb10g010050	reaction_114532
Sb01g009930	Sb01g006190	direct_complex_114548
Sb01g009930	Sb01g006190	neighbouring_reaction_114523<->Reaction<->114549
Sb01g009930	Sb01g006190	neighbouring_reaction_114549<->Reaction<->114523
Sb01g009930	Sb01g006190	reaction_114549
Sb01g009930	Sb01g007850	neighbouring_reaction_108411<->Reaction<->114532
Sb01g009930	Sb01g007850	neighbouring_reaction_108411<->Reaction<->115253
Sb01g009930	Sb01g007850	neighbouring_reaction_114532<->Reaction<->108411
Sb01g009930	Sb01g007850	neighbouring_reaction_115253<->Reaction<->108411
Sb01g009930	Sb01g009920	neighbouring_reaction_108411<->Reaction<->114532
Sb01g009930	Sb01g009920	neighbouring_reaction_108411<->Reaction<->115253
Sb01g009930	Sb01g009920	neighbouring_reaction_114532<->Reaction<->108411
Sb01g009930	Sb01g009920	neighbouring_reaction_115253<->Reaction<->108411
Sb01g009930	Sb01g009920	neighbouring_reaction_108411<->Reaction<->114532
Sb01g009930	Sb01g009920	neighbouring_reaction_108411<->Reaction<->115253
Sb01g009930	Sb01g009920	neighbouring_reaction_114532<->Reaction<->108411
Sb01g009930	Sb01g009920	neighbouring_reaction_115253<->Reaction<->108411
Sb01g009930	Sb01g013843	direct_complex_114548
Sb01g009930	Sb01g013843	neighbouring_reaction_114523<->Reaction<->114549
Sb01g009930	Sb01g013843	neighbouring_reaction_114549<->Reaction<->114523
Sb01g009930	Sb01g013843	reaction_114549
Sb01g009930	Sb01g037340	neighbouring_reaction_108411<->Reaction<->114532
Sb01g009930	Sb01g037340	neighbouring_reaction_108411<->Reaction<->115253
Sb01g009930	Sb01g037340	neighbouring_reaction_114532<->Reaction<->108411
Sb01g009930	Sb01g037340	neighbouring_reaction_115253<->Reaction<->108411
Sb01g009930	Sb02g002760	direct_complex_114548
Sb01g009930	Sb02g002760	neighbouring_reaction_114523<->Reaction<->114549
Sb01g009930	Sb02g002760	neighbouring_reaction_114549<->Reaction<->114523
Sb01g009930	Sb02g002760	reaction_114549
Sb01g009930	Sb10g010050	direct_complex_114531
Sb01g009930	Sb10g010050	neighbouring_reaction_108411<->Reaction<->114532
Sb01g009930	Sb10g010050	neighbouring_reaction_114532<->Reaction<->108411
Sb01g009930	Sb10g010050	reaction_114532
Sb01g010060	Sb01g038460	neighbouring_reaction_109124<->Reaction<->109137
Sb01g010060	Sb01g038460	neighbouring_reaction_109137<->Reaction<->109124
Sb01g010060	Sb01g038460	neighbouring_reaction_109124<->Reaction<->109137
Sb01g010060	Sb01g038460	neighbouring_reaction_109137<->Reaction<->109124
Sb01g010060	Sb01g038460	neighbouring_reaction_109124<->Reaction<->109137
Sb01g010060	Sb01g038460	neighbouring_reaction_109137<->Reaction<->109124
Sb01g010060	Sb05g000440	neighbouring_reaction_109124<->Reaction<->109137
Sb01g010060	Sb05g000440	neighbouring_reaction_109137<->Reaction<->109124
Sb01g010060	Sb10g009590	neighbouring_reaction_109124<->Reaction<->109137
Sb01g010060	Sb10g009590	neighbouring_reaction_109137<->Reaction<->109124
Sb01g010140	Sb09g001230	neighbouring_reaction_108866<->Reaction<->108888
Sb01g010140	Sb09g001230	neighbouring_reaction_108888<->Reaction<->108866
Sb01g010140	Sb09g006040	neighbouring_reaction_108866<->Reaction<->108888
Sb01g010140	Sb09g006040	neighbouring_reaction_108888<->Reaction<->108866
Sb01g010240	Sb01g028560	neighbouring_reaction_111186<->Reaction<->111186
Sb01g010240	Sb01g028560	neighbouring_reaction_111186<->Reaction<->111194
Sb01g010240	Sb01g028560	neighbouring_reaction_111186<->Reaction<->111195
Sb01g010240	Sb01g028560	neighbouring_reaction_111186<->Reaction<->111203
Sb01g010240	Sb01g028560	neighbouring_reaction_111194<->Reaction<->111186
Sb01g010240	Sb01g028560	neighbouring_reaction_111195<->Reaction<->111186
Sb01g010240	Sb01g028560	neighbouring_reaction_111203<->Reaction<->111186
Sb01g010240	Sb03g031260	neighbouring_reaction_111186<->Reaction<->111186
Sb01g010240	Sb03g031260	neighbouring_reaction_111186<->Reaction<->111194
Sb01g010240	Sb03g031260	neighbouring_reaction_111186<->Reaction<->111195
Sb01g010240	Sb03g031260	neighbouring_reaction_111186<->Reaction<->111203
Sb01g010240	Sb03g031260	neighbouring_reaction_111194<->Reaction<->111186
Sb01g010240	Sb03g031260	neighbouring_reaction_111195<->Reaction<->111186
Sb01g010240	Sb03g031260	neighbouring_reaction_111203<->Reaction<->111186
Sb01g010250	Sb01g008690	neighbouring_reaction_107849<->Reaction<->113331
Sb01g010250	Sb01g008690	neighbouring_reaction_113331<->Reaction<->107849
Sb01g010250	Sb01g008690	neighbouring_reaction_107849<->Reaction<->113331
Sb01g010250	Sb01g008690	neighbouring_reaction_113331<->Reaction<->107849
Sb01g010250	Sb01g043930	neighbouring_reaction_109244<->Reaction<->113331
Sb01g010250	Sb01g043930	neighbouring_reaction_113331<->Reaction<->109244
Sb01g010250	Sb03g031880	neighbouring_reaction_113363<->Reaction<->114098
Sb01g010250	Sb03g031880	neighbouring_reaction_114098<->Reaction<->113363
Sb01g010250	Sb07g028080	neighbouring_reaction_113328<->Reaction<->113331
Sb01g010250	Sb07g028080	neighbouring_reaction_113331<->Reaction<->113328
Sb01g010250	Sb09g027430	neighbouring_reaction_113363<->Reaction<->114098
Sb01g010250	Sb09g027430	neighbouring_reaction_114098<->Reaction<->113363
Sb01g010280	Sb01g006480	neighbouring_reaction_108588<->Reaction<->110535
Sb01g010280	Sb01g006480	neighbouring_reaction_110535<->Reaction<->108588
Sb01g010280	Sb01g006480	neighbouring_reaction_108588<->Reaction<->110535
Sb01g010280	Sb01g006480	neighbouring_reaction_110535<->Reaction<->108588
Sb01g010280	Sb01g007560	neighbouring_reaction_108581<->Reaction<->113406
Sb01g010280	Sb01g007560	neighbouring_reaction_113406<->Reaction<->108581
Sb01g010280	Sb01g007560	neighbouring_reaction_108581<->Reaction<->113406
Sb01g010280	Sb01g007560	neighbouring_reaction_113406<->Reaction<->108581
Sb01g010280	Sb02g004280	neighbouring_reaction_110669<->Reaction<->110676
Sb01g010280	Sb02g004280	neighbouring_reaction_110676<->Reaction<->110669
Sb01g010280	Sb02g004280	neighbouring_reaction_110669<->Reaction<->110676
Sb01g010280	Sb02g004280	neighbouring_reaction_110676<->Reaction<->110669
Sb01g010280	Sb02g020410	neighbouring_reaction_108992<->Reaction<->110535
Sb01g010280	Sb02g020410	neighbouring_reaction_110535<->Reaction<->108992
Sb01g010280	Sb02g027000	neighbouring_reaction_108581<->Reaction<->108595
Sb01g010280	Sb02g027000	neighbouring_reaction_108592<->Reaction<->110536
Sb01g010280	Sb02g027000	neighbouring_reaction_108595<->Reaction<->108581
Sb01g010280	Sb02g027000	neighbouring_reaction_108596<->Reaction<->110536
Sb01g010280	Sb02g027000	neighbouring_reaction_110536<->Reaction<->108592
Sb01g010280	Sb02g027000	neighbouring_reaction_110536<->Reaction<->108596
Sb01g010280	Sb03g040060	neighbouring_reaction_108581<->Reaction<->113406
Sb01g010280	Sb03g040060	neighbouring_reaction_113406<->Reaction<->108581
Sb01g010280	Sb07g012320	neighbouring_reaction_108992<->Reaction<->110535
Sb01g010280	Sb07g012320	neighbouring_reaction_110535<->Reaction<->108992
Sb01g010280	Sb07g012320	neighbouring_reaction_108992<->Reaction<->110535
Sb01g010280	Sb07g012320	neighbouring_reaction_110535<->Reaction<->108992
Sb01g010470	Sb01g019920	neighbouring_reaction_106174<->Reaction<->109361
Sb01g010470	Sb01g019920	neighbouring_reaction_109361<->Reaction<->106174
Sb01g010470	Sb01g019920	neighbouring_reaction_106174<->Reaction<->109361
Sb01g010470	Sb01g019920	neighbouring_reaction_109361<->Reaction<->106174
Sb01g010470	Sb01g048850	neighbouring_reaction_106174<->Reaction<->109361
Sb01g010470	Sb01g048850	neighbouring_reaction_109361<->Reaction<->106174
Sb01g010470	Sb01g049430	neighbouring_reaction_107875<->Reaction<->107961
Sb01g010470	Sb01g049430	neighbouring_reaction_107961<->Reaction<->107875
Sb01g010470	Sb03g036210	neighbouring_reaction_106174<->Reaction<->111444
Sb01g010470	Sb03g036210	neighbouring_reaction_111444<->Reaction<->106174
Sb01g010470	Sb06g031050	neighbouring_reaction_106173<->Reaction<->107876
Sb01g010470	Sb06g031050	neighbouring_reaction_106174<->Reaction<->107961
Sb01g010470	Sb06g031050	neighbouring_reaction_107876<->Reaction<->106173
Sb01g010470	Sb06g031050	neighbouring_reaction_107961<->Reaction<->106174
Sb01g010470	Sb08g016690	neighbouring_reaction_106174<->Reaction<->111444
Sb01g010470	Sb08g016690	neighbouring_reaction_111444<->Reaction<->106174
Sb01g010470	Sb08g016690	neighbouring_reaction_106174<->Reaction<->111444
Sb01g010470	Sb08g016690	neighbouring_reaction_111444<->Reaction<->106174
Sb01g010470	Sb08g023000	neighbouring_reaction_106174<->Reaction<->111444
Sb01g010470	Sb08g023000	neighbouring_reaction_111444<->Reaction<->106174
Sb01g010470	Sb08g023000	neighbouring_reaction_106174<->Reaction<->111444
Sb01g010470	Sb08g023000	neighbouring_reaction_111444<->Reaction<->106174
Sb01g010470	Sb09g030100	neighbouring_reaction_106174<->Reaction<->111444
Sb01g010470	Sb09g030100	neighbouring_reaction_111444<->Reaction<->106174
Sb01g011080	Sb01g015190	neighbouring_reaction_112026<->Reaction<->113097
Sb01g011080	Sb01g015190	neighbouring_reaction_113097<->Reaction<->112026
Sb01g011900	Sb03g035220	neighbouring_reaction_106581<->Reaction<->113136
Sb01g011900	Sb03g035220	neighbouring_reaction_113136<->Reaction<->106581
Sb01g012680	Sb03g031880	neighbouring_reaction_109248<->Reaction<->114098
Sb01g012680	Sb03g031880	neighbouring_reaction_114098<->Reaction<->109248
Sb01g012680	Sb09g027430	neighbouring_reaction_109248<->Reaction<->114098
Sb01g012680	Sb09g027430	neighbouring_reaction_114098<->Reaction<->109248
Sb01g012960	Sb01g034130	neighbouring_reaction_107947<->Reaction<->114044
Sb01g012960	Sb01g034130	neighbouring_reaction_107947<->Reaction<->114048
Sb01g012960	Sb01g034130	neighbouring_reaction_107947<->Reaction<->114103
Sb01g012960	Sb01g034130	neighbouring_reaction_114044<->Reaction<->107947
Sb01g012960	Sb01g034130	neighbouring_reaction_114048<->Reaction<->107947
Sb01g012960	Sb01g034130	neighbouring_reaction_114103<->Reaction<->107947
Sb01g012960	Sb01g042830	neighbouring_reaction_107947<->Reaction<->109232
Sb01g012960	Sb01g042830	neighbouring_reaction_109232<->Reaction<->107947
Sb01g012960	Sb03g011930	neighbouring_reaction_107947<->Reaction<->114270
Sb01g012960	Sb03g011930	neighbouring_reaction_114270<->Reaction<->107947
Sb01g012960	Sb03g013170	neighbouring_reaction_107947<->Reaction<->114270
Sb01g012960	Sb03g013170	neighbouring_reaction_114270<->Reaction<->107947
Sb01g012960	Sb03g013170	neighbouring_reaction_107947<->Reaction<->114270
Sb01g012960	Sb03g013170	neighbouring_reaction_114270<->Reaction<->107947
Sb01g012960	Sb04g029070	neighbouring_reaction_107947<->Reaction<->109232
Sb01g012960	Sb04g029070	neighbouring_reaction_109232<->Reaction<->107947
Sb01g012960	Sb05g014470	neighbouring_reaction_107947<->Reaction<->114743
Sb01g012960	Sb05g014470	neighbouring_reaction_114743<->Reaction<->107947
Sb01g012960	Sb05g014470	neighbouring_reaction_107947<->Reaction<->114743
Sb01g012960	Sb05g014470	neighbouring_reaction_114743<->Reaction<->107947
Sb01g012960	Sb09g002840	neighbouring_reaction_107947<->Reaction<->114270
Sb01g012960	Sb09g002840	neighbouring_reaction_114270<->Reaction<->107947
Sb01g012960	Sb10g005100	neighbouring_reaction_107947<->Reaction<->113135
Sb01g012960	Sb10g005100	neighbouring_reaction_113135<->Reaction<->107947
Sb01g012960	Sb01g034130	neighbouring_reaction_107947<->Reaction<->114044
Sb01g012960	Sb01g034130	neighbouring_reaction_107947<->Reaction<->114048
Sb01g012960	Sb01g034130	neighbouring_reaction_107947<->Reaction<->114103
Sb01g012960	Sb01g034130	neighbouring_reaction_114044<->Reaction<->107947
Sb01g012960	Sb01g034130	neighbouring_reaction_114048<->Reaction<->107947
Sb01g012960	Sb01g034130	neighbouring_reaction_114103<->Reaction<->107947
Sb01g012960	Sb01g042830	neighbouring_reaction_107947<->Reaction<->109232
Sb01g012960	Sb01g042830	neighbouring_reaction_109232<->Reaction<->107947
Sb01g012960	Sb03g011930	neighbouring_reaction_107947<->Reaction<->114270
Sb01g012960	Sb03g011930	neighbouring_reaction_114270<->Reaction<->107947
Sb01g012960	Sb03g013170	neighbouring_reaction_107947<->Reaction<->114270
Sb01g012960	Sb03g013170	neighbouring_reaction_114270<->Reaction<->107947
Sb01g012960	Sb03g013170	neighbouring_reaction_107947<->Reaction<->114270
Sb01g012960	Sb03g013170	neighbouring_reaction_114270<->Reaction<->107947
Sb01g012960	Sb04g029070	neighbouring_reaction_107947<->Reaction<->109232
Sb01g012960	Sb04g029070	neighbouring_reaction_109232<->Reaction<->107947
Sb01g012960	Sb05g014470	neighbouring_reaction_107947<->Reaction<->114743
Sb01g012960	Sb05g014470	neighbouring_reaction_114743<->Reaction<->107947
Sb01g012960	Sb05g014470	neighbouring_reaction_107947<->Reaction<->114743
Sb01g012960	Sb05g014470	neighbouring_reaction_114743<->Reaction<->107947
Sb01g012960	Sb09g002840	neighbouring_reaction_107947<->Reaction<->114270
Sb01g012960	Sb09g002840	neighbouring_reaction_114270<->Reaction<->107947
Sb01g012960	Sb10g005100	neighbouring_reaction_107947<->Reaction<->113135
Sb01g012960	Sb10g005100	neighbouring_reaction_113135<->Reaction<->107947
Sb01g012960	Sb01g034130	neighbouring_reaction_107947<->Reaction<->114044
Sb01g012960	Sb01g034130	neighbouring_reaction_107947<->Reaction<->114048
Sb01g012960	Sb01g034130	neighbouring_reaction_107947<->Reaction<->114103
Sb01g012960	Sb01g034130	neighbouring_reaction_114044<->Reaction<->107947
Sb01g012960	Sb01g034130	neighbouring_reaction_114048<->Reaction<->107947
Sb01g012960	Sb01g034130	neighbouring_reaction_114103<->Reaction<->107947
Sb01g012960	Sb01g042830	neighbouring_reaction_107947<->Reaction<->109232
Sb01g012960	Sb01g042830	neighbouring_reaction_109232<->Reaction<->107947
Sb01g012960	Sb03g011930	neighbouring_reaction_107947<->Reaction<->114270
Sb01g012960	Sb03g011930	neighbouring_reaction_114270<->Reaction<->107947
Sb01g012960	Sb03g013170	neighbouring_reaction_107947<->Reaction<->114270
Sb01g012960	Sb03g013170	neighbouring_reaction_114270<->Reaction<->107947
Sb01g012960	Sb03g013170	neighbouring_reaction_107947<->Reaction<->114270
Sb01g012960	Sb03g013170	neighbouring_reaction_114270<->Reaction<->107947
Sb01g012960	Sb04g029070	neighbouring_reaction_107947<->Reaction<->109232
Sb01g012960	Sb04g029070	neighbouring_reaction_109232<->Reaction<->107947
Sb01g012960	Sb05g014470	neighbouring_reaction_107947<->Reaction<->114743
Sb01g012960	Sb05g014470	neighbouring_reaction_114743<->Reaction<->107947
Sb01g012960	Sb05g014470	neighbouring_reaction_107947<->Reaction<->114743
Sb01g012960	Sb05g014470	neighbouring_reaction_114743<->Reaction<->107947
Sb01g012960	Sb09g002840	neighbouring_reaction_107947<->Reaction<->114270
Sb01g012960	Sb09g002840	neighbouring_reaction_114270<->Reaction<->107947
Sb01g012960	Sb10g005100	neighbouring_reaction_107947<->Reaction<->113135
Sb01g012960	Sb10g005100	neighbouring_reaction_113135<->Reaction<->107947
Sb01g013600	Sb03g039820	neighbouring_reaction_113193<->Reaction<->113258
Sb01g013600	Sb03g039820	neighbouring_reaction_113258<->Reaction<->113193
Sb01g013600	Sb03g039820	neighbouring_reaction_113193<->Reaction<->113258
Sb01g013600	Sb03g039820	neighbouring_reaction_113258<->Reaction<->113193
Sb01g013600	Sb04g030600	neighbouring_reaction_109748<->Reaction<->113258
Sb01g013600	Sb04g030600	neighbouring_reaction_113258<->Reaction<->109748
Sb01g013600	Sb06g000580	neighbouring_reaction_113043<->Reaction<->113258
Sb01g013600	Sb06g000580	neighbouring_reaction_113258<->Reaction<->113043
Sb01g013600	Sb09g022290	neighbouring_reaction_113193<->Reaction<->113258
Sb01g013600	Sb09g022290	neighbouring_reaction_113258<->Reaction<->113193
Sb01g013600	Sb09g022290	neighbouring_reaction_113193<->Reaction<->113258
Sb01g013600	Sb09g022290	neighbouring_reaction_113258<->Reaction<->113193
Sb01g013843	Sb01g010660	direct_complex_114552
Sb01g013843	Sb01g010660	reaction_114553
Sb01g013843	Sb01g029000	direct_complex_114546
Sb01g013843	Sb01g029000	reaction_114547
Sb01g013843	Sb02g002760	neighbouring_reaction_114523<->Reaction<->114549
Sb01g013843	Sb02g002760	neighbouring_reaction_114549<->Reaction<->114523
Sb01g013843	Sb04g026190	direct_complex_114554
Sb01g013843	Sb04g026190	reaction_114555
Sb01g013843	Sb06g024480	direct_complex_114546
Sb01g013843	Sb06g024480	reaction_114547
Sb01g014020	Sb02g010910	neighbouring_reaction_113291<->Reaction<->115118
Sb01g014020	Sb02g010910	neighbouring_reaction_115118<->Reaction<->113291
Sb01g014020	Sb03g038160	neighbouring_reaction_113291<->Reaction<->115118
Sb01g014020	Sb03g038160	neighbouring_reaction_115118<->Reaction<->113291
Sb01g014570	Sb09g002480	neighbouring_reaction_113734<->Reaction<->113737
Sb01g014570	Sb09g002480	neighbouring_reaction_113735<->Reaction<->113736
Sb01g014570	Sb09g002480	neighbouring_reaction_113736<->Reaction<->113735
Sb01g014570	Sb09g002480	neighbouring_reaction_113737<->Reaction<->113734
Sb01g014970	Sb02g030500	neighbouring_reaction_115460<->Reaction<->115602
Sb01g014970	Sb02g030500	neighbouring_reaction_115602<->Reaction<->115460
Sb01g014970	Sb03g047200	neighbouring_reaction_115602<->Reaction<->115647
Sb01g014970	Sb03g047200	neighbouring_reaction_115647<->Reaction<->115602
Sb01g015190	Sb04g002810	neighbouring_reaction_113097<->Reaction<->113113
Sb01g015190	Sb04g002810	neighbouring_reaction_113113<->Reaction<->113097
Sb01g015510	Sb0012s002210	neighbouring_reaction_106136<->Reaction<->106147
Sb01g015510	Sb0012s002210	neighbouring_reaction_106147<->Reaction<->106136
Sb01g015510	Sb01g044290	neighbouring_reaction_106136<->Reaction<->106147
Sb01g015510	Sb01g044290	neighbouring_reaction_106147<->Reaction<->106136
Sb01g015510	Sb01g044290	neighbouring_reaction_106136<->Reaction<->106147
Sb01g015510	Sb01g044290	neighbouring_reaction_106147<->Reaction<->106136
Sb01g015510	Sb01g044290	neighbouring_reaction_106136<->Reaction<->106147
Sb01g015510	Sb01g044290	neighbouring_reaction_106147<->Reaction<->106136
Sb01g015510	Sb06g014820	neighbouring_reaction_106134<->Reaction<->109883
Sb01g015510	Sb06g014820	neighbouring_reaction_106136<->Reaction<->109883
Sb01g015510	Sb06g014820	neighbouring_reaction_109883<->Reaction<->106134
Sb01g015510	Sb06g014820	neighbouring_reaction_109883<->Reaction<->106136
Sb01g015510	Sb06g014820	neighbouring_reaction_109883<->Reaction<->113711
Sb01g015510	Sb06g014820	neighbouring_reaction_113711<->Reaction<->109883
Sb01g015510	Sb10g026840	neighbouring_reaction_106134<->Reaction<->109883
Sb01g015510	Sb10g026840	neighbouring_reaction_106136<->Reaction<->109883
Sb01g015510	Sb10g026840	neighbouring_reaction_109883<->Reaction<->106134
Sb01g015510	Sb10g026840	neighbouring_reaction_109883<->Reaction<->106136
Sb01g015510	Sb10g026840	neighbouring_reaction_109883<->Reaction<->113711
Sb01g015510	Sb10g026840	neighbouring_reaction_113711<->Reaction<->109883
Sb01g016420	Sb02g010910	neighbouring_reaction_109392<->Reaction<->115118
Sb01g016420	Sb02g010910	neighbouring_reaction_115118<->Reaction<->109392
Sb01g016420	Sb03g038160	neighbouring_reaction_109392<->Reaction<->115118
Sb01g016420	Sb03g038160	neighbouring_reaction_115118<->Reaction<->109392
Sb01g016420	Sb10g004540	neighbouring_reaction_108875<->Reaction<->114792
Sb01g016420	Sb10g004540	neighbouring_reaction_109042<->Reaction<->114792
Sb01g016420	Sb10g004540	neighbouring_reaction_114792<->Reaction<->108875
Sb01g016420	Sb10g004540	neighbouring_reaction_114792<->Reaction<->109042
Sb01g018210	Sb01g027910	neighbouring_reaction_114413<->Reaction<->114967
Sb01g018210	Sb01g027910	neighbouring_reaction_114967<->Reaction<->114413
Sb01g018210	Sb01g027910	neighbouring_reaction_114413<->Reaction<->114967
Sb01g018210	Sb01g027910	neighbouring_reaction_114967<->Reaction<->114413
Sb01g018230	Sb09g016840	neighbouring_reaction_109930<->Reaction<->109934
Sb01g018230	Sb09g016840	neighbouring_reaction_109934<->Reaction<->109930
Sb01g019920	Sb03g036210	neighbouring_reaction_109361<->Reaction<->111444
Sb01g019920	Sb03g036210	neighbouring_reaction_111444<->Reaction<->109361
Sb01g019920	Sb08g016690	neighbouring_reaction_109361<->Reaction<->111444
Sb01g019920	Sb08g016690	neighbouring_reaction_111444<->Reaction<->109361
Sb01g019920	Sb08g016690	neighbouring_reaction_109361<->Reaction<->111444
Sb01g019920	Sb08g016690	neighbouring_reaction_111444<->Reaction<->109361
Sb01g019920	Sb08g023000	neighbouring_reaction_109361<->Reaction<->111444
Sb01g019920	Sb08g023000	neighbouring_reaction_111444<->Reaction<->109361
Sb01g019920	Sb08g023000	neighbouring_reaction_109361<->Reaction<->111444
Sb01g019920	Sb08g023000	neighbouring_reaction_111444<->Reaction<->109361
Sb01g019920	Sb09g030100	neighbouring_reaction_109361<->Reaction<->111444
Sb01g019920	Sb09g030100	neighbouring_reaction_111444<->Reaction<->109361
Sb01g019920	Sb03g036210	neighbouring_reaction_109361<->Reaction<->111444
Sb01g019920	Sb03g036210	neighbouring_reaction_111444<->Reaction<->109361
Sb01g019920	Sb08g016690	neighbouring_reaction_109361<->Reaction<->111444
Sb01g019920	Sb08g016690	neighbouring_reaction_111444<->Reaction<->109361
Sb01g019920	Sb08g016690	neighbouring_reaction_109361<->Reaction<->111444
Sb01g019920	Sb08g016690	neighbouring_reaction_111444<->Reaction<->109361
Sb01g019920	Sb08g023000	neighbouring_reaction_109361<->Reaction<->111444
Sb01g019920	Sb08g023000	neighbouring_reaction_111444<->Reaction<->109361
Sb01g019920	Sb08g023000	neighbouring_reaction_109361<->Reaction<->111444
Sb01g019920	Sb08g023000	neighbouring_reaction_111444<->Reaction<->109361
Sb01g019920	Sb09g030100	neighbouring_reaction_109361<->Reaction<->111444
Sb01g019920	Sb09g030100	neighbouring_reaction_111444<->Reaction<->109361
Sb01g020280	Sb10g006430	neighbouring_reaction_105632<->Reaction<->108374
Sb01g020280	Sb10g006430	neighbouring_reaction_105633<->Reaction<->114235
Sb01g020280	Sb10g006430	neighbouring_reaction_105634<->Reaction<->112575
Sb01g020280	Sb10g006430	neighbouring_reaction_105635<->Reaction<->115071
Sb01g020280	Sb10g006430	neighbouring_reaction_105636<->Reaction<->111132
Sb01g020280	Sb10g006430	neighbouring_reaction_105702<->Reaction<->110759
Sb01g020280	Sb10g006430	neighbouring_reaction_105703<->Reaction<->109690
Sb01g020280	Sb10g006430	neighbouring_reaction_108374<->Reaction<->105632
Sb01g020280	Sb10g006430	neighbouring_reaction_109690<->Reaction<->105703
Sb01g020280	Sb10g006430	neighbouring_reaction_110759<->Reaction<->105702
Sb01g020280	Sb10g006430	neighbouring_reaction_111132<->Reaction<->105636
Sb01g020280	Sb10g006430	neighbouring_reaction_112575<->Reaction<->105634
Sb01g020280	Sb10g006430	neighbouring_reaction_114235<->Reaction<->105633
Sb01g020280	Sb10g006430	neighbouring_reaction_115071<->Reaction<->105635
Sb01g020300	Sb10g006430	neighbouring_reaction_105632<->Reaction<->108374
Sb01g020300	Sb10g006430	neighbouring_reaction_105633<->Reaction<->114235
Sb01g020300	Sb10g006430	neighbouring_reaction_105634<->Reaction<->112575
Sb01g020300	Sb10g006430	neighbouring_reaction_105635<->Reaction<->115071
Sb01g020300	Sb10g006430	neighbouring_reaction_105636<->Reaction<->111132
Sb01g020300	Sb10g006430	neighbouring_reaction_105702<->Reaction<->110759
Sb01g020300	Sb10g006430	neighbouring_reaction_105703<->Reaction<->109690
Sb01g020300	Sb10g006430	neighbouring_reaction_108374<->Reaction<->105632
Sb01g020300	Sb10g006430	neighbouring_reaction_109690<->Reaction<->105703
Sb01g020300	Sb10g006430	neighbouring_reaction_110759<->Reaction<->105702
Sb01g020300	Sb10g006430	neighbouring_reaction_111132<->Reaction<->105636
Sb01g020300	Sb10g006430	neighbouring_reaction_112575<->Reaction<->105634
Sb01g020300	Sb10g006430	neighbouring_reaction_114235<->Reaction<->105633
Sb01g020300	Sb10g006430	neighbouring_reaction_115071<->Reaction<->105635
Sb01g020310	Sb10g006430	neighbouring_reaction_105632<->Reaction<->108374
Sb01g020310	Sb10g006430	neighbouring_reaction_105633<->Reaction<->114235
Sb01g020310	Sb10g006430	neighbouring_reaction_105634<->Reaction<->112575
Sb01g020310	Sb10g006430	neighbouring_reaction_105635<->Reaction<->115071
Sb01g020310	Sb10g006430	neighbouring_reaction_105636<->Reaction<->111132
Sb01g020310	Sb10g006430	neighbouring_reaction_105702<->Reaction<->110759
Sb01g020310	Sb10g006430	neighbouring_reaction_105703<->Reaction<->109690
Sb01g020310	Sb10g006430	neighbouring_reaction_108374<->Reaction<->105632
Sb01g020310	Sb10g006430	neighbouring_reaction_109690<->Reaction<->105703
Sb01g020310	Sb10g006430	neighbouring_reaction_110759<->Reaction<->105702
Sb01g020310	Sb10g006430	neighbouring_reaction_111132<->Reaction<->105636
Sb01g020310	Sb10g006430	neighbouring_reaction_112575<->Reaction<->105634
Sb01g020310	Sb10g006430	neighbouring_reaction_114235<->Reaction<->105633
Sb01g020310	Sb10g006430	neighbouring_reaction_115071<->Reaction<->105635
Sb01g021000	Sb03g041770	reaction_109450
Sb01g021000	Sb09g020840	reaction_109450
Sb01g021520	Sb01g018230	neighbouring_reaction_109926<->Reaction<->109930
Sb01g021520	Sb01g018230	neighbouring_reaction_109930<->Reaction<->109926
Sb01g021520	Sb09g016840	neighbouring_reaction_109926<->Reaction<->109934
Sb01g021520	Sb09g016840	neighbouring_reaction_109934<->Reaction<->109926
Sb01g021980	Sb03g029840	neighbouring_reaction_112815<->Reaction<->113834
Sb01g021980	Sb03g029840	neighbouring_reaction_113834<->Reaction<->112815
Sb01g021980	Sb06g022050	neighbouring_reaction_112815<->Reaction<->113834
Sb01g021980	Sb06g022050	neighbouring_reaction_113834<->Reaction<->112815
Sb01g021980	Sb09g029110	neighbouring_reaction_112815<->Reaction<->113834
Sb01g021980	Sb09g029110	neighbouring_reaction_113834<->Reaction<->112815
Sb01g021980	Sb09g029110	neighbouring_reaction_112815<->Reaction<->113834
Sb01g021980	Sb09g029110	neighbouring_reaction_113834<->Reaction<->112815
Sb01g023740	Sb01g036690	neighbouring_reaction_109351<->Reaction<->113018
Sb01g023740	Sb01g036690	neighbouring_reaction_113018<->Reaction<->109351
Sb01g023740	Sb01g036690	neighbouring_reaction_113018<->Reaction<->114043
Sb01g023740	Sb01g036690	neighbouring_reaction_114043<->Reaction<->113018
Sb01g023740	Sb03g011130	neighbouring_reaction_109351<->Reaction<->113018
Sb01g023740	Sb03g011130	neighbouring_reaction_113018<->Reaction<->109351
Sb01g023740	Sb03g011130	neighbouring_reaction_113018<->Reaction<->114043
Sb01g023740	Sb03g011130	neighbouring_reaction_114043<->Reaction<->113018
Sb01g023740	Sb04g028690	neighbouring_reaction_109167<->Reaction<->113018
Sb01g023740	Sb04g028690	neighbouring_reaction_113018<->Reaction<->109167
Sb01g023740	Sb04g028690	neighbouring_reaction_109167<->Reaction<->113018
Sb01g023740	Sb04g028690	neighbouring_reaction_113018<->Reaction<->109167
Sb01g023740	Sb04g028690	neighbouring_reaction_109167<->Reaction<->113018
Sb01g023740	Sb04g028690	neighbouring_reaction_113018<->Reaction<->109167
Sb01g023740	Sb06g032940	neighbouring_reaction_109351<->Reaction<->113018
Sb01g023740	Sb06g032940	neighbouring_reaction_113018<->Reaction<->109351
Sb01g023740	Sb06g032940	neighbouring_reaction_113018<->Reaction<->114043
Sb01g023740	Sb06g032940	neighbouring_reaction_114043<->Reaction<->113018
Sb01g023750	Sb01g036690	neighbouring_reaction_109351<->Reaction<->113018
Sb01g023750	Sb01g036690	neighbouring_reaction_113018<->Reaction<->109351
Sb01g023750	Sb01g036690	neighbouring_reaction_113018<->Reaction<->114043
Sb01g023750	Sb01g036690	neighbouring_reaction_114043<->Reaction<->113018
Sb01g023750	Sb03g011130	neighbouring_reaction_109351<->Reaction<->113018
Sb01g023750	Sb03g011130	neighbouring_reaction_113018<->Reaction<->109351
Sb01g023750	Sb03g011130	neighbouring_reaction_113018<->Reaction<->114043
Sb01g023750	Sb03g011130	neighbouring_reaction_114043<->Reaction<->113018
Sb01g023750	Sb04g028690	neighbouring_reaction_109167<->Reaction<->113018
Sb01g023750	Sb04g028690	neighbouring_reaction_113018<->Reaction<->109167
Sb01g023750	Sb04g028690	neighbouring_reaction_109167<->Reaction<->113018
Sb01g023750	Sb04g028690	neighbouring_reaction_113018<->Reaction<->109167
Sb01g023750	Sb04g028690	neighbouring_reaction_109167<->Reaction<->113018
Sb01g023750	Sb04g028690	neighbouring_reaction_113018<->Reaction<->109167
Sb01g023750	Sb06g032940	neighbouring_reaction_109351<->Reaction<->113018
Sb01g023750	Sb06g032940	neighbouring_reaction_113018<->Reaction<->109351
Sb01g023750	Sb06g032940	neighbouring_reaction_113018<->Reaction<->114043
Sb01g023750	Sb06g032940	neighbouring_reaction_114043<->Reaction<->113018
Sb01g023750	Sb01g036690	neighbouring_reaction_109351<->Reaction<->113018
Sb01g023750	Sb01g036690	neighbouring_reaction_113018<->Reaction<->109351
Sb01g023750	Sb01g036690	neighbouring_reaction_113018<->Reaction<->114043
Sb01g023750	Sb01g036690	neighbouring_reaction_114043<->Reaction<->113018
Sb01g023750	Sb03g011130	neighbouring_reaction_109351<->Reaction<->113018
Sb01g023750	Sb03g011130	neighbouring_reaction_113018<->Reaction<->109351
Sb01g023750	Sb03g011130	neighbouring_reaction_113018<->Reaction<->114043
Sb01g023750	Sb03g011130	neighbouring_reaction_114043<->Reaction<->113018
Sb01g023750	Sb04g028690	neighbouring_reaction_109167<->Reaction<->113018
Sb01g023750	Sb04g028690	neighbouring_reaction_113018<->Reaction<->109167
Sb01g023750	Sb04g028690	neighbouring_reaction_109167<->Reaction<->113018
Sb01g023750	Sb04g028690	neighbouring_reaction_113018<->Reaction<->109167
Sb01g023750	Sb04g028690	neighbouring_reaction_109167<->Reaction<->113018
Sb01g023750	Sb04g028690	neighbouring_reaction_113018<->Reaction<->109167
Sb01g023750	Sb06g032940	neighbouring_reaction_109351<->Reaction<->113018
Sb01g023750	Sb06g032940	neighbouring_reaction_113018<->Reaction<->109351
Sb01g023750	Sb06g032940	neighbouring_reaction_113018<->Reaction<->114043
Sb01g023750	Sb06g032940	neighbouring_reaction_114043<->Reaction<->113018
Sb01g023750	Sb01g036690	neighbouring_reaction_109351<->Reaction<->113018
Sb01g023750	Sb01g036690	neighbouring_reaction_113018<->Reaction<->109351
Sb01g023750	Sb01g036690	neighbouring_reaction_113018<->Reaction<->114043
Sb01g023750	Sb01g036690	neighbouring_reaction_114043<->Reaction<->113018
Sb01g023750	Sb03g011130	neighbouring_reaction_109351<->Reaction<->113018
Sb01g023750	Sb03g011130	neighbouring_reaction_113018<->Reaction<->109351
Sb01g023750	Sb03g011130	neighbouring_reaction_113018<->Reaction<->114043
Sb01g023750	Sb03g011130	neighbouring_reaction_114043<->Reaction<->113018
Sb01g023750	Sb04g028690	neighbouring_reaction_109167<->Reaction<->113018
Sb01g023750	Sb04g028690	neighbouring_reaction_113018<->Reaction<->109167
Sb01g023750	Sb04g028690	neighbouring_reaction_109167<->Reaction<->113018
Sb01g023750	Sb04g028690	neighbouring_reaction_113018<->Reaction<->109167
Sb01g023750	Sb04g028690	neighbouring_reaction_109167<->Reaction<->113018
Sb01g023750	Sb04g028690	neighbouring_reaction_113018<->Reaction<->109167
Sb01g023750	Sb06g032940	neighbouring_reaction_109351<->Reaction<->113018
Sb01g023750	Sb06g032940	neighbouring_reaction_113018<->Reaction<->109351
Sb01g023750	Sb06g032940	neighbouring_reaction_113018<->Reaction<->114043
Sb01g023750	Sb06g032940	neighbouring_reaction_114043<->Reaction<->113018
Sb01g023750	Sb01g036690	neighbouring_reaction_109351<->Reaction<->113018
Sb01g023750	Sb01g036690	neighbouring_reaction_113018<->Reaction<->109351
Sb01g023750	Sb01g036690	neighbouring_reaction_113018<->Reaction<->114043
Sb01g023750	Sb01g036690	neighbouring_reaction_114043<->Reaction<->113018
Sb01g023750	Sb03g011130	neighbouring_reaction_109351<->Reaction<->113018
Sb01g023750	Sb03g011130	neighbouring_reaction_113018<->Reaction<->109351
Sb01g023750	Sb03g011130	neighbouring_reaction_113018<->Reaction<->114043
Sb01g023750	Sb03g011130	neighbouring_reaction_114043<->Reaction<->113018
Sb01g023750	Sb04g028690	neighbouring_reaction_109167<->Reaction<->113018
Sb01g023750	Sb04g028690	neighbouring_reaction_113018<->Reaction<->109167
Sb01g023750	Sb04g028690	neighbouring_reaction_109167<->Reaction<->113018
Sb01g023750	Sb04g028690	neighbouring_reaction_113018<->Reaction<->109167
Sb01g023750	Sb04g028690	neighbouring_reaction_109167<->Reaction<->113018
Sb01g023750	Sb04g028690	neighbouring_reaction_113018<->Reaction<->109167
Sb01g023750	Sb06g032940	neighbouring_reaction_109351<->Reaction<->113018
Sb01g023750	Sb06g032940	neighbouring_reaction_113018<->Reaction<->109351
Sb01g023750	Sb06g032940	neighbouring_reaction_113018<->Reaction<->114043
Sb01g023750	Sb06g032940	neighbouring_reaction_114043<->Reaction<->113018
Sb01g023750	Sb01g036690	neighbouring_reaction_109351<->Reaction<->113018
Sb01g023750	Sb01g036690	neighbouring_reaction_113018<->Reaction<->109351
Sb01g023750	Sb01g036690	neighbouring_reaction_113018<->Reaction<->114043
Sb01g023750	Sb01g036690	neighbouring_reaction_114043<->Reaction<->113018
Sb01g023750	Sb03g011130	neighbouring_reaction_109351<->Reaction<->113018
Sb01g023750	Sb03g011130	neighbouring_reaction_113018<->Reaction<->109351
Sb01g023750	Sb03g011130	neighbouring_reaction_113018<->Reaction<->114043
Sb01g023750	Sb03g011130	neighbouring_reaction_114043<->Reaction<->113018
Sb01g023750	Sb04g028690	neighbouring_reaction_109167<->Reaction<->113018
Sb01g023750	Sb04g028690	neighbouring_reaction_113018<->Reaction<->109167
Sb01g023750	Sb04g028690	neighbouring_reaction_109167<->Reaction<->113018
Sb01g023750	Sb04g028690	neighbouring_reaction_113018<->Reaction<->109167
Sb01g023750	Sb04g028690	neighbouring_reaction_109167<->Reaction<->113018
Sb01g023750	Sb04g028690	neighbouring_reaction_113018<->Reaction<->109167
Sb01g023750	Sb06g032940	neighbouring_reaction_109351<->Reaction<->113018
Sb01g023750	Sb06g032940	neighbouring_reaction_113018<->Reaction<->109351
Sb01g023750	Sb06g032940	neighbouring_reaction_113018<->Reaction<->114043
Sb01g023750	Sb06g032940	neighbouring_reaction_114043<->Reaction<->113018
Sb01g027540	Sb03g005340	neighbouring_reaction_106027<->Reaction<->114952
Sb01g027540	Sb03g005340	neighbouring_reaction_106028<->Reaction<->114952
Sb01g027540	Sb03g005340	neighbouring_reaction_114952<->Reaction<->106027
Sb01g027540	Sb03g005340	neighbouring_reaction_114952<->Reaction<->106028
Sb01g027540	Sb04g005960	neighbouring_reaction_106027<->Reaction<->114952
Sb01g027540	Sb04g005960	neighbouring_reaction_106028<->Reaction<->114952
Sb01g027540	Sb04g005960	neighbouring_reaction_114952<->Reaction<->106027
Sb01g027540	Sb04g005960	neighbouring_reaction_114952<->Reaction<->106028
Sb01g027540	Sb10g009990	neighbouring_reaction_106027<->Reaction<->114952
Sb01g027540	Sb10g009990	neighbouring_reaction_106028<->Reaction<->114952
Sb01g027540	Sb10g009990	neighbouring_reaction_114952<->Reaction<->106027
Sb01g027540	Sb10g009990	neighbouring_reaction_114952<->Reaction<->106028
Sb01g027570	Sb03g005340	neighbouring_reaction_106027<->Reaction<->114952
Sb01g027570	Sb03g005340	neighbouring_reaction_106028<->Reaction<->114952
Sb01g027570	Sb03g005340	neighbouring_reaction_114952<->Reaction<->106027
Sb01g027570	Sb03g005340	neighbouring_reaction_114952<->Reaction<->106028
Sb01g027570	Sb04g005960	neighbouring_reaction_106027<->Reaction<->114952
Sb01g027570	Sb04g005960	neighbouring_reaction_106028<->Reaction<->114952
Sb01g027570	Sb04g005960	neighbouring_reaction_114952<->Reaction<->106027
Sb01g027570	Sb04g005960	neighbouring_reaction_114952<->Reaction<->106028
Sb01g027570	Sb10g009990	neighbouring_reaction_106027<->Reaction<->114952
Sb01g027570	Sb10g009990	neighbouring_reaction_106028<->Reaction<->114952
Sb01g027570	Sb10g009990	neighbouring_reaction_114952<->Reaction<->106027
Sb01g027570	Sb10g009990	neighbouring_reaction_114952<->Reaction<->106028
Sb01g027570	Sb03g005340	neighbouring_reaction_106027<->Reaction<->114952
Sb01g027570	Sb03g005340	neighbouring_reaction_106028<->Reaction<->114952
Sb01g027570	Sb03g005340	neighbouring_reaction_114952<->Reaction<->106027
Sb01g027570	Sb03g005340	neighbouring_reaction_114952<->Reaction<->106028
Sb01g027570	Sb04g005960	neighbouring_reaction_106027<->Reaction<->114952
Sb01g027570	Sb04g005960	neighbouring_reaction_106028<->Reaction<->114952
Sb01g027570	Sb04g005960	neighbouring_reaction_114952<->Reaction<->106027
Sb01g027570	Sb04g005960	neighbouring_reaction_114952<->Reaction<->106028
Sb01g027570	Sb10g009990	neighbouring_reaction_106027<->Reaction<->114952
Sb01g027570	Sb10g009990	neighbouring_reaction_106028<->Reaction<->114952
Sb01g027570	Sb10g009990	neighbouring_reaction_114952<->Reaction<->106027
Sb01g027570	Sb10g009990	neighbouring_reaction_114952<->Reaction<->106028
Sb01g027790	Sb10g003690	neighbouring_reaction_114782<->Reaction<->115408
Sb01g027790	Sb10g003690	neighbouring_reaction_115408<->Reaction<->114782
Sb01g027790	Sb10g003690	neighbouring_reaction_114782<->Reaction<->115408
Sb01g027790	Sb10g003690	neighbouring_reaction_115408<->Reaction<->114782
Sb01g027860	Sb04g033080	neighbouring_reaction_105619<->Reaction<->105623
Sb01g027860	Sb04g033080	neighbouring_reaction_105623<->Reaction<->105619
Sb01g027860	Sb04g033080	neighbouring_reaction_105619<->Reaction<->105623
Sb01g027860	Sb04g033080	neighbouring_reaction_105623<->Reaction<->105619
Sb01g027910	Sb03g047310	neighbouring_reaction_114967<->Reaction<->114973
Sb01g027910	Sb03g047310	neighbouring_reaction_114973<->Reaction<->114967
Sb01g028560	Sb01g010240	neighbouring_reaction_111186<->Reaction<->111186
Sb01g028560	Sb01g010240	neighbouring_reaction_111186<->Reaction<->111194
Sb01g028560	Sb01g010240	neighbouring_reaction_111186<->Reaction<->111195
Sb01g028560	Sb01g010240	neighbouring_reaction_111186<->Reaction<->111203
Sb01g028560	Sb01g010240	neighbouring_reaction_111194<->Reaction<->111186
Sb01g028560	Sb01g010240	neighbouring_reaction_111195<->Reaction<->111186
Sb01g028560	Sb01g010240	neighbouring_reaction_111203<->Reaction<->111186
Sb01g028700	Sb01g042750	neighbouring_reaction_113546<->Reaction<->115007
Sb01g028700	Sb01g042750	neighbouring_reaction_115007<->Reaction<->113546
Sb01g028700	Sb06g027550	neighbouring_reaction_113400<->Reaction<->113559
Sb01g028700	Sb06g027550	neighbouring_reaction_113559<->Reaction<->113400
Sb01g029750	Sb03g001200	neighbouring_reaction_107847<->Reaction<->113379
Sb01g029750	Sb03g001200	neighbouring_reaction_113379<->Reaction<->107847
Sb01g029750	Sb03g007890	neighbouring_reaction_109210<->Reaction<->113226
Sb01g029750	Sb03g007890	neighbouring_reaction_113226<->Reaction<->109210
Sb01g029750	Sb04g034870	neighbouring_reaction_109206<->Reaction<->113224
Sb01g029750	Sb04g034870	neighbouring_reaction_113224<->Reaction<->109206
Sb01g029750	Sb10g008310	neighbouring_reaction_109262<->Reaction<->113379
Sb01g029750	Sb10g008310	neighbouring_reaction_113379<->Reaction<->109262
Sb01g029750	Sb10g008310	neighbouring_reaction_109262<->Reaction<->113379
Sb01g029750	Sb10g008310	neighbouring_reaction_113379<->Reaction<->109262
Sb01g029750	Sb10g008310	neighbouring_reaction_109262<->Reaction<->113379
Sb01g029750	Sb10g008310	neighbouring_reaction_113379<->Reaction<->109262
Sb01g029750	Sb03g001200	neighbouring_reaction_107847<->Reaction<->113379
Sb01g029750	Sb03g001200	neighbouring_reaction_113379<->Reaction<->107847
Sb01g029750	Sb03g007890	neighbouring_reaction_109210<->Reaction<->113226
Sb01g029750	Sb03g007890	neighbouring_reaction_113226<->Reaction<->109210
Sb01g029750	Sb04g034870	neighbouring_reaction_109206<->Reaction<->113224
Sb01g029750	Sb04g034870	neighbouring_reaction_113224<->Reaction<->109206
Sb01g029750	Sb10g008310	neighbouring_reaction_109262<->Reaction<->113379
Sb01g029750	Sb10g008310	neighbouring_reaction_113379<->Reaction<->109262
Sb01g029750	Sb10g008310	neighbouring_reaction_109262<->Reaction<->113379
Sb01g029750	Sb10g008310	neighbouring_reaction_113379<->Reaction<->109262
Sb01g029750	Sb10g008310	neighbouring_reaction_109262<->Reaction<->113379
Sb01g029750	Sb10g008310	neighbouring_reaction_113379<->Reaction<->109262
Sb01g029750	Sb03g001200	neighbouring_reaction_107847<->Reaction<->113379
Sb01g029750	Sb03g001200	neighbouring_reaction_113379<->Reaction<->107847
Sb01g029750	Sb03g007890	neighbouring_reaction_109210<->Reaction<->113226
Sb01g029750	Sb03g007890	neighbouring_reaction_113226<->Reaction<->109210
Sb01g029750	Sb04g034870	neighbouring_reaction_109206<->Reaction<->113224
Sb01g029750	Sb04g034870	neighbouring_reaction_113224<->Reaction<->109206
Sb01g029750	Sb10g008310	neighbouring_reaction_109262<->Reaction<->113379
Sb01g029750	Sb10g008310	neighbouring_reaction_113379<->Reaction<->109262
Sb01g029750	Sb10g008310	neighbouring_reaction_109262<->Reaction<->113379
Sb01g029750	Sb10g008310	neighbouring_reaction_113379<->Reaction<->109262
Sb01g029750	Sb10g008310	neighbouring_reaction_109262<->Reaction<->113379
Sb01g029750	Sb10g008310	neighbouring_reaction_113379<->Reaction<->109262
Sb01g031100	Sb01g018210	neighbouring_reaction_114413<->Reaction<->114431
Sb01g031100	Sb01g018210	neighbouring_reaction_114413<->Reaction<->114432
Sb01g031100	Sb01g018210	neighbouring_reaction_114431<->Reaction<->114413
Sb01g031100	Sb01g018210	neighbouring_reaction_114432<->Reaction<->114413
Sb01g031100	Sb01g018210	neighbouring_reaction_114413<->Reaction<->114431
Sb01g031100	Sb01g018210	neighbouring_reaction_114413<->Reaction<->114432
Sb01g031100	Sb01g018210	neighbouring_reaction_114431<->Reaction<->114413
Sb01g031100	Sb01g018210	neighbouring_reaction_114432<->Reaction<->114413
Sb01g031300	Sb09g002470	neighbouring_reaction_108898<->Reaction<->109158
Sb01g031300	Sb09g002470	neighbouring_reaction_109158<->Reaction<->108898
Sb01g031520	Sb03g040810	neighbouring_reaction_115743<->Reaction<->115806
Sb01g031520	Sb03g040810	neighbouring_reaction_115743<->Reaction<->115807
Sb01g031520	Sb03g040810	neighbouring_reaction_115806<->Reaction<->115743
Sb01g031520	Sb03g040810	neighbouring_reaction_115807<->Reaction<->115743
Sb01g031520	Sb03g040810	neighbouring_reaction_115743<->Reaction<->115806
Sb01g031520	Sb03g040810	neighbouring_reaction_115743<->Reaction<->115807
Sb01g031520	Sb03g040810	neighbouring_reaction_115806<->Reaction<->115743
Sb01g031520	Sb03g040810	neighbouring_reaction_115807<->Reaction<->115743
Sb01g031520	Sb03g040810	neighbouring_reaction_115743<->Reaction<->115806
Sb01g031520	Sb03g040810	neighbouring_reaction_115743<->Reaction<->115807
Sb01g031520	Sb03g040810	neighbouring_reaction_115806<->Reaction<->115743
Sb01g031520	Sb03g040810	neighbouring_reaction_115807<->Reaction<->115743
Sb01g031520	Sb03g040810	neighbouring_reaction_115743<->Reaction<->115806
Sb01g031520	Sb03g040810	neighbouring_reaction_115743<->Reaction<->115807
Sb01g031520	Sb03g040810	neighbouring_reaction_115806<->Reaction<->115743
Sb01g031520	Sb03g040810	neighbouring_reaction_115807<->Reaction<->115743
Sb01g031660	Sb01g036690	neighbouring_reaction_109342<->Reaction<->109351
Sb01g031660	Sb01g036690	neighbouring_reaction_109342<->Reaction<->114043
Sb01g031660	Sb01g036690	neighbouring_reaction_109351<->Reaction<->109342
Sb01g031660	Sb01g036690	neighbouring_reaction_114043<->Reaction<->109342
Sb01g031660	Sb02g021090	neighbouring_reaction_109342<->Reaction<->114269
Sb01g031660	Sb02g021090	neighbouring_reaction_114269<->Reaction<->109342
Sb01g031660	Sb03g011130	neighbouring_reaction_109342<->Reaction<->109351
Sb01g031660	Sb03g011130	neighbouring_reaction_109342<->Reaction<->114043
Sb01g031660	Sb03g011130	neighbouring_reaction_109351<->Reaction<->109342
Sb01g031660	Sb03g011130	neighbouring_reaction_114043<->Reaction<->109342
Sb01g031660	Sb03g035090	neighbouring_reaction_109342<->Reaction<->114269
Sb01g031660	Sb03g035090	neighbouring_reaction_114269<->Reaction<->109342
Sb01g031660	Sb04g008720	neighbouring_reaction_109342<->Reaction<->114269
Sb01g031660	Sb04g008720	neighbouring_reaction_114269<->Reaction<->109342
Sb01g031660	Sb06g032940	neighbouring_reaction_109342<->Reaction<->109351
Sb01g031660	Sb06g032940	neighbouring_reaction_109342<->Reaction<->114043
Sb01g031660	Sb06g032940	neighbouring_reaction_109351<->Reaction<->109342
Sb01g031660	Sb06g032940	neighbouring_reaction_114043<->Reaction<->109342
Sb01g031660	Sb07g014960	neighbouring_reaction_109342<->Reaction<->114269
Sb01g031660	Sb07g014960	neighbouring_reaction_114269<->Reaction<->109342
Sb01g031660	Sb10g021330	neighbouring_reaction_109342<->Reaction<->114269
Sb01g031660	Sb10g021330	neighbouring_reaction_114269<->Reaction<->109342
Sb01g032250	Sb01g018210	neighbouring_reaction_108835<->Reaction<->114413
Sb01g032250	Sb01g018210	neighbouring_reaction_114413<->Reaction<->108835
Sb01g032250	Sb01g018210	neighbouring_reaction_108835<->Reaction<->114413
Sb01g032250	Sb01g018210	neighbouring_reaction_114413<->Reaction<->108835
Sb01g032250	Sb02g021100	neighbouring_reaction_108835<->Reaction<->110428
Sb01g032250	Sb02g021100	neighbouring_reaction_110428<->Reaction<->108835
Sb01g032250	Sb03g006220	neighbouring_reaction_108835<->Reaction<->110428
Sb01g032250	Sb03g006220	neighbouring_reaction_110428<->Reaction<->108835
Sb01g032250	Sb03g006220	neighbouring_reaction_108835<->Reaction<->110428
Sb01g032250	Sb03g006220	neighbouring_reaction_110428<->Reaction<->108835
Sb01g032250	Sb03g006220	neighbouring_reaction_108835<->Reaction<->110428
Sb01g032250	Sb03g006220	neighbouring_reaction_110428<->Reaction<->108835
Sb01g032250	Sb03g035100	neighbouring_reaction_108835<->Reaction<->110428
Sb01g032250	Sb03g035100	neighbouring_reaction_110428<->Reaction<->108835
Sb01g032260	Sb03g011110	neighbouring_reaction_107874<->Reaction<->114484
Sb01g032260	Sb03g011110	neighbouring_reaction_114484<->Reaction<->107874
Sb01g032260	Sb08g020870	neighbouring_reaction_107874<->Reaction<->114484
Sb01g032260	Sb08g020870	neighbouring_reaction_114484<->Reaction<->107874
Sb01g032360	Sb02g043990	neighbouring_reaction_109846<->Reaction<->111835
Sb01g032360	Sb02g043990	neighbouring_reaction_111835<->Reaction<->109846
Sb01g032360	Sb03g002410	neighbouring_reaction_109846<->Reaction<->111835
Sb01g032360	Sb03g002410	neighbouring_reaction_111835<->Reaction<->109846
Sb01g032360	Sb03g024490	indirect_complex_109839
Sb01g032360	Sb03g024490	indirect_complex_109888
Sb01g032360	Sb03g024490	neighbouring_reaction_109846<->Reaction<->109889
Sb01g032360	Sb03g024490	neighbouring_reaction_109846<->Reaction<->111131
Sb01g032360	Sb03g024490	neighbouring_reaction_109846<->Reaction<->111835
Sb01g032360	Sb03g024490	neighbouring_reaction_109887<->Reaction<->113594
Sb01g032360	Sb03g024490	neighbouring_reaction_109887<->Reaction<->113595
Sb01g032360	Sb03g024490	neighbouring_reaction_109889<->Reaction<->109846
Sb01g032360	Sb03g024490	neighbouring_reaction_109889<->Reaction<->113594
Sb01g032360	Sb03g024490	neighbouring_reaction_109889<->Reaction<->113595
Sb01g032360	Sb03g024490	neighbouring_reaction_111131<->Reaction<->109846
Sb01g032360	Sb03g024490	neighbouring_reaction_111835<->Reaction<->109846
Sb01g032360	Sb03g024490	neighbouring_reaction_113594<->Reaction<->109887
Sb01g032360	Sb03g024490	neighbouring_reaction_113594<->Reaction<->109889
Sb01g032360	Sb03g024490	neighbouring_reaction_113595<->Reaction<->109887
Sb01g032360	Sb03g024490	neighbouring_reaction_113595<->Reaction<->109889
Sb01g032360	Sb03g024490	reaction_113594
Sb01g032360	Sb04g036050	indirect_complex_109839
Sb01g032360	Sb04g036050	indirect_complex_109888
Sb01g032360	Sb04g036050	neighbouring_reaction_109846<->Reaction<->109889
Sb01g032360	Sb04g036050	neighbouring_reaction_109846<->Reaction<->111131
Sb01g032360	Sb04g036050	neighbouring_reaction_109846<->Reaction<->111835
Sb01g032360	Sb04g036050	neighbouring_reaction_109887<->Reaction<->113594
Sb01g032360	Sb04g036050	neighbouring_reaction_109887<->Reaction<->113595
Sb01g032360	Sb04g036050	neighbouring_reaction_109889<->Reaction<->109846
Sb01g032360	Sb04g036050	neighbouring_reaction_109889<->Reaction<->113594
Sb01g032360	Sb04g036050	neighbouring_reaction_109889<->Reaction<->113595
Sb01g032360	Sb04g036050	neighbouring_reaction_111131<->Reaction<->109846
Sb01g032360	Sb04g036050	neighbouring_reaction_111835<->Reaction<->109846
Sb01g032360	Sb04g036050	neighbouring_reaction_113594<->Reaction<->109887
Sb01g032360	Sb04g036050	neighbouring_reaction_113594<->Reaction<->109889
Sb01g032360	Sb04g036050	neighbouring_reaction_113595<->Reaction<->109887
Sb01g032360	Sb04g036050	neighbouring_reaction_113595<->Reaction<->109889
Sb01g032360	Sb04g036050	reaction_113594
Sb01g032360	Sb06g017330	indirect_complex_109839
Sb01g032360	Sb06g017330	indirect_complex_109888
Sb01g032360	Sb06g017330	neighbouring_reaction_109846<->Reaction<->109889
Sb01g032360	Sb06g017330	neighbouring_reaction_109846<->Reaction<->111131
Sb01g032360	Sb06g017330	neighbouring_reaction_109846<->Reaction<->111835
Sb01g032360	Sb06g017330	neighbouring_reaction_109887<->Reaction<->113594
Sb01g032360	Sb06g017330	neighbouring_reaction_109887<->Reaction<->113595
Sb01g032360	Sb06g017330	neighbouring_reaction_109889<->Reaction<->109846
Sb01g032360	Sb06g017330	neighbouring_reaction_109889<->Reaction<->113594
Sb01g032360	Sb06g017330	neighbouring_reaction_109889<->Reaction<->113595
Sb01g032360	Sb06g017330	neighbouring_reaction_111131<->Reaction<->109846
Sb01g032360	Sb06g017330	neighbouring_reaction_111835<->Reaction<->109846
Sb01g032360	Sb06g017330	neighbouring_reaction_113594<->Reaction<->109887
Sb01g032360	Sb06g017330	neighbouring_reaction_113594<->Reaction<->109889
Sb01g032360	Sb06g017330	neighbouring_reaction_113595<->Reaction<->109887
Sb01g032360	Sb06g017330	neighbouring_reaction_113595<->Reaction<->109889
Sb01g032360	Sb06g017330	reaction_113594
Sb01g032360	Sb06g033210	neighbouring_reaction_109846<->Reaction<->111835
Sb01g032360	Sb06g033210	neighbouring_reaction_111835<->Reaction<->109846
Sb01g032360	Sb06g033210	neighbouring_reaction_109846<->Reaction<->111835
Sb01g032360	Sb06g033210	neighbouring_reaction_111835<->Reaction<->109846
Sb01g032360	Sb07g022680	neighbouring_reaction_111129<->Reaction<->111131
Sb01g032360	Sb07g022680	neighbouring_reaction_111131<->Reaction<->111129
Sb01g032360	Sb08g018160	indirect_complex_109839
Sb01g032360	Sb08g018160	indirect_complex_109888
Sb01g032360	Sb08g018160	neighbouring_reaction_109846<->Reaction<->109889
Sb01g032360	Sb08g018160	neighbouring_reaction_109846<->Reaction<->111131
Sb01g032360	Sb08g018160	neighbouring_reaction_109846<->Reaction<->111835
Sb01g032360	Sb08g018160	neighbouring_reaction_109887<->Reaction<->113594
Sb01g032360	Sb08g018160	neighbouring_reaction_109887<->Reaction<->113595
Sb01g032360	Sb08g018160	neighbouring_reaction_109889<->Reaction<->109846
Sb01g032360	Sb08g018160	neighbouring_reaction_109889<->Reaction<->113594
Sb01g032360	Sb08g018160	neighbouring_reaction_109889<->Reaction<->113595
Sb01g032360	Sb08g018160	neighbouring_reaction_111131<->Reaction<->109846
Sb01g032360	Sb08g018160	neighbouring_reaction_111835<->Reaction<->109846
Sb01g032360	Sb08g018160	neighbouring_reaction_113594<->Reaction<->109887
Sb01g032360	Sb08g018160	neighbouring_reaction_113594<->Reaction<->109889
Sb01g032360	Sb08g018160	neighbouring_reaction_113595<->Reaction<->109887
Sb01g032360	Sb08g018160	neighbouring_reaction_113595<->Reaction<->109889
Sb01g032360	Sb08g018160	reaction_113594
Sb01g032360	Sb09g003270	neighbouring_reaction_109846<->Reaction<->111835
Sb01g032360	Sb09g003270	neighbouring_reaction_111835<->Reaction<->109846
Sb01g032360	Sb09g008010	indirect_complex_109839
Sb01g032360	Sb09g008010	indirect_complex_109888
Sb01g032360	Sb09g008010	neighbouring_reaction_109846<->Reaction<->109889
Sb01g032360	Sb09g008010	neighbouring_reaction_109846<->Reaction<->111131
Sb01g032360	Sb09g008010	neighbouring_reaction_109846<->Reaction<->111835
Sb01g032360	Sb09g008010	neighbouring_reaction_109887<->Reaction<->113594
Sb01g032360	Sb09g008010	neighbouring_reaction_109887<->Reaction<->113595
Sb01g032360	Sb09g008010	neighbouring_reaction_109889<->Reaction<->109846
Sb01g032360	Sb09g008010	neighbouring_reaction_109889<->Reaction<->113594
Sb01g032360	Sb09g008010	neighbouring_reaction_109889<->Reaction<->113595
Sb01g032360	Sb09g008010	neighbouring_reaction_111131<->Reaction<->109846
Sb01g032360	Sb09g008010	neighbouring_reaction_111835<->Reaction<->109846
Sb01g032360	Sb09g008010	neighbouring_reaction_113594<->Reaction<->109887
Sb01g032360	Sb09g008010	neighbouring_reaction_113594<->Reaction<->109889
Sb01g032360	Sb09g008010	neighbouring_reaction_113595<->Reaction<->109887
Sb01g032360	Sb09g008010	neighbouring_reaction_113595<->Reaction<->109889
Sb01g032360	Sb09g008010	reaction_113594
Sb01g032360	Sb09g022830	indirect_complex_109844
Sb01g032360	Sb09g022830	neighbouring_reaction_109846<->Reaction<->109889
Sb01g032360	Sb09g022830	neighbouring_reaction_109846<->Reaction<->111131
Sb01g032360	Sb09g022830	neighbouring_reaction_109846<->Reaction<->111835
Sb01g032360	Sb09g022830	neighbouring_reaction_109887<->Reaction<->113595
Sb01g032360	Sb09g022830	neighbouring_reaction_109889<->Reaction<->109846
Sb01g032360	Sb09g022830	neighbouring_reaction_109889<->Reaction<->113594
Sb01g032360	Sb09g022830	neighbouring_reaction_109889<->Reaction<->113595
Sb01g032360	Sb09g022830	neighbouring_reaction_111131<->Reaction<->109846
Sb01g032360	Sb09g022830	neighbouring_reaction_111835<->Reaction<->109846
Sb01g032360	Sb09g022830	neighbouring_reaction_113594<->Reaction<->109889
Sb01g032360	Sb09g022830	neighbouring_reaction_113595<->Reaction<->109887
Sb01g032360	Sb09g022830	neighbouring_reaction_113595<->Reaction<->109889
Sb01g032360	Sb09g022830	reaction_113595
Sb01g032360	Sb09g023360	indirect_complex_109839
Sb01g032360	Sb09g023360	indirect_complex_109888
Sb01g032360	Sb09g023360	neighbouring_reaction_109846<->Reaction<->109889
Sb01g032360	Sb09g023360	neighbouring_reaction_109846<->Reaction<->111131
Sb01g032360	Sb09g023360	neighbouring_reaction_109846<->Reaction<->111835
Sb01g032360	Sb09g023360	neighbouring_reaction_109887<->Reaction<->113594
Sb01g032360	Sb09g023360	neighbouring_reaction_109887<->Reaction<->113595
Sb01g032360	Sb09g023360	neighbouring_reaction_109889<->Reaction<->109846
Sb01g032360	Sb09g023360	neighbouring_reaction_109889<->Reaction<->113594
Sb01g032360	Sb09g023360	neighbouring_reaction_109889<->Reaction<->113595
Sb01g032360	Sb09g023360	neighbouring_reaction_111131<->Reaction<->109846
Sb01g032360	Sb09g023360	neighbouring_reaction_111835<->Reaction<->109846
Sb01g032360	Sb09g023360	neighbouring_reaction_113594<->Reaction<->109887
Sb01g032360	Sb09g023360	neighbouring_reaction_113594<->Reaction<->109889
Sb01g032360	Sb09g023360	neighbouring_reaction_113595<->Reaction<->109887
Sb01g032360	Sb09g023360	neighbouring_reaction_113595<->Reaction<->109889
Sb01g032360	Sb09g023360	reaction_113594
Sb01g032360	Sb10g007540	indirect_complex_109844
Sb01g032360	Sb10g007540	neighbouring_reaction_109846<->Reaction<->109889
Sb01g032360	Sb10g007540	neighbouring_reaction_109846<->Reaction<->111131
Sb01g032360	Sb10g007540	neighbouring_reaction_109887<->Reaction<->113595
Sb01g032360	Sb10g007540	neighbouring_reaction_109889<->Reaction<->109846
Sb01g032360	Sb10g007540	neighbouring_reaction_109889<->Reaction<->113594
Sb01g032360	Sb10g007540	neighbouring_reaction_109889<->Reaction<->113595
Sb01g032360	Sb10g007540	neighbouring_reaction_111131<->Reaction<->109846
Sb01g032360	Sb10g007540	neighbouring_reaction_113594<->Reaction<->109889
Sb01g032360	Sb10g007540	neighbouring_reaction_113595<->Reaction<->109887
Sb01g032360	Sb10g007540	neighbouring_reaction_113595<->Reaction<->109889
Sb01g032360	Sb10g007540	reaction_113595
Sb01g033060	Sb0067s002010	neighbouring_reaction_115027<->Reaction<->115689
Sb01g033060	Sb0067s002010	neighbouring_reaction_115689<->Reaction<->115027
Sb01g033060	Sb0067s002110	neighbouring_reaction_115027<->Reaction<->115689
Sb01g033060	Sb0067s002110	neighbouring_reaction_115689<->Reaction<->115027
Sb01g033060	Sb0067s002130	neighbouring_reaction_115027<->Reaction<->115689
Sb01g033060	Sb0067s002130	neighbouring_reaction_115689<->Reaction<->115027
Sb01g033060	Sb0067s002240	neighbouring_reaction_115027<->Reaction<->115689
Sb01g033060	Sb0067s002240	neighbouring_reaction_115689<->Reaction<->115027
Sb01g033060	Sb01g007580	neighbouring_reaction_115039<->Reaction<->115602
Sb01g033060	Sb01g007580	neighbouring_reaction_115602<->Reaction<->115039
Sb01g033060	Sb01g007580	neighbouring_reaction_115039<->Reaction<->115602
Sb01g033060	Sb01g007580	neighbouring_reaction_115602<->Reaction<->115039
Sb01g033060	Sb01g007580	neighbouring_reaction_115039<->Reaction<->115602
Sb01g033060	Sb01g007580	neighbouring_reaction_115602<->Reaction<->115039
Sb01g033060	Sb01g007580	neighbouring_reaction_115039<->Reaction<->115602
Sb01g033060	Sb01g007580	neighbouring_reaction_115602<->Reaction<->115039
Sb01g033060	Sb01g007580	neighbouring_reaction_115039<->Reaction<->115602
Sb01g033060	Sb01g007580	neighbouring_reaction_115602<->Reaction<->115039
Sb01g033060	Sb01g008910	neighbouring_reaction_115027<->Reaction<->115689
Sb01g033060	Sb01g008910	neighbouring_reaction_115689<->Reaction<->115027
Sb01g033060	Sb01g014970	neighbouring_reaction_115039<->Reaction<->115602
Sb01g033060	Sb01g014970	neighbouring_reaction_115602<->Reaction<->115039
Sb01g033060	Sb01g035380	neighbouring_reaction_115039<->Reaction<->115463
Sb01g033060	Sb01g035380	neighbouring_reaction_115463<->Reaction<->115039
Sb01g033060	Sb01g043150	neighbouring_reaction_115039<->Reaction<->115602
Sb01g033060	Sb01g043150	neighbouring_reaction_115602<->Reaction<->115039
Sb01g033060	Sb02g030500	neighbouring_reaction_115039<->Reaction<->115460
Sb01g033060	Sb02g030500	neighbouring_reaction_115460<->Reaction<->115039
Sb01g033060	Sb02g032250	neighbouring_reaction_108574<->Reaction<->115039
Sb01g033060	Sb02g032250	neighbouring_reaction_110534<->Reaction<->115039
Sb01g033060	Sb02g032250	neighbouring_reaction_115039<->Reaction<->108574
Sb01g033060	Sb02g032250	neighbouring_reaction_115039<->Reaction<->110534
Sb01g033060	Sb02g032250	neighbouring_reaction_115689<->Reaction<->115777
Sb01g033060	Sb02g032250	neighbouring_reaction_115777<->Reaction<->115689
Sb01g033060	Sb04g001320	neighbouring_reaction_108574<->Reaction<->115039
Sb01g033060	Sb04g001320	neighbouring_reaction_110534<->Reaction<->115039
Sb01g033060	Sb04g001320	neighbouring_reaction_115039<->Reaction<->108574
Sb01g033060	Sb04g001320	neighbouring_reaction_115039<->Reaction<->110534
Sb01g033060	Sb04g001320	neighbouring_reaction_115689<->Reaction<->115777
Sb01g033060	Sb04g001320	neighbouring_reaction_115777<->Reaction<->115689
Sb01g033060	Sb04g021810	neighbouring_reaction_115027<->Reaction<->115689
Sb01g033060	Sb04g021810	neighbouring_reaction_115689<->Reaction<->115027
Sb01g033060	Sb04g021810	neighbouring_reaction_115027<->Reaction<->115689
Sb01g033060	Sb04g021810	neighbouring_reaction_115689<->Reaction<->115027
Sb01g033060	Sb04g021810	neighbouring_reaction_115027<->Reaction<->115689
Sb01g033060	Sb04g021810	neighbouring_reaction_115689<->Reaction<->115027
Sb01g033360	Sb02g024040	neighbouring_reaction_106186<->Reaction<->113542
Sb01g033360	Sb02g024040	neighbouring_reaction_113542<->Reaction<->106186
Sb01g033360	Sb03g013290	neighbouring_reaction_106186<->Reaction<->114645
Sb01g033360	Sb03g013290	neighbouring_reaction_114645<->Reaction<->106186
Sb01g033360	Sb09g004610	neighbouring_reaction_106186<->Reaction<->114645
Sb01g033360	Sb09g004610	neighbouring_reaction_114645<->Reaction<->106186
Sb01g033360	Sb02g024040	neighbouring_reaction_106186<->Reaction<->113542
Sb01g033360	Sb02g024040	neighbouring_reaction_113542<->Reaction<->106186
Sb01g033360	Sb03g013290	neighbouring_reaction_106186<->Reaction<->114645
Sb01g033360	Sb03g013290	neighbouring_reaction_114645<->Reaction<->106186
Sb01g033360	Sb09g004610	neighbouring_reaction_106186<->Reaction<->114645
Sb01g033360	Sb09g004610	neighbouring_reaction_114645<->Reaction<->106186
Sb01g033480	Sb01g018210	neighbouring_reaction_114413<->Reaction<->114431
Sb01g033480	Sb01g018210	neighbouring_reaction_114413<->Reaction<->114432
Sb01g033480	Sb01g018210	neighbouring_reaction_114431<->Reaction<->114413
Sb01g033480	Sb01g018210	neighbouring_reaction_114432<->Reaction<->114413
Sb01g033480	Sb01g018210	neighbouring_reaction_114413<->Reaction<->114431
Sb01g033480	Sb01g018210	neighbouring_reaction_114413<->Reaction<->114432
Sb01g033480	Sb01g018210	neighbouring_reaction_114431<->Reaction<->114413
Sb01g033480	Sb01g018210	neighbouring_reaction_114432<->Reaction<->114413
Sb01g033480	Sb01g018210	neighbouring_reaction_114413<->Reaction<->114431
Sb01g033480	Sb01g018210	neighbouring_reaction_114413<->Reaction<->114432
Sb01g033480	Sb01g018210	neighbouring_reaction_114431<->Reaction<->114413
Sb01g033480	Sb01g018210	neighbouring_reaction_114432<->Reaction<->114413
Sb01g033480	Sb01g018210	neighbouring_reaction_114413<->Reaction<->114431
Sb01g033480	Sb01g018210	neighbouring_reaction_114413<->Reaction<->114432
Sb01g033480	Sb01g018210	neighbouring_reaction_114431<->Reaction<->114413
Sb01g033480	Sb01g018210	neighbouring_reaction_114432<->Reaction<->114413
Sb01g034130	Sb03g033120	neighbouring_reaction_113327<->Reaction<->114076
Sb01g034130	Sb03g033120	neighbouring_reaction_114076<->Reaction<->113327
Sb01g034130	Sb09g026560	neighbouring_reaction_113327<->Reaction<->114076
Sb01g034130	Sb09g026560	neighbouring_reaction_114076<->Reaction<->113327
Sb01g035380	Sb01g007580	neighbouring_reaction_115463<->Reaction<->115602
Sb01g035380	Sb01g007580	neighbouring_reaction_115602<->Reaction<->115463
Sb01g035380	Sb01g007580	neighbouring_reaction_115694<->Reaction<->115697
Sb01g035380	Sb01g007580	neighbouring_reaction_115697<->Reaction<->115694
Sb01g035380	Sb01g007580	neighbouring_reaction_115463<->Reaction<->115602
Sb01g035380	Sb01g007580	neighbouring_reaction_115602<->Reaction<->115463
Sb01g035380	Sb01g007580	neighbouring_reaction_115694<->Reaction<->115697
Sb01g035380	Sb01g007580	neighbouring_reaction_115697<->Reaction<->115694
Sb01g035380	Sb01g007580	neighbouring_reaction_115463<->Reaction<->115602
Sb01g035380	Sb01g007580	neighbouring_reaction_115602<->Reaction<->115463
Sb01g035380	Sb01g007580	neighbouring_reaction_115694<->Reaction<->115697
Sb01g035380	Sb01g007580	neighbouring_reaction_115697<->Reaction<->115694
Sb01g035380	Sb01g007580	neighbouring_reaction_115463<->Reaction<->115602
Sb01g035380	Sb01g007580	neighbouring_reaction_115602<->Reaction<->115463
Sb01g035380	Sb01g007580	neighbouring_reaction_115694<->Reaction<->115697
Sb01g035380	Sb01g007580	neighbouring_reaction_115697<->Reaction<->115694
Sb01g035380	Sb01g007580	neighbouring_reaction_115463<->Reaction<->115602
Sb01g035380	Sb01g007580	neighbouring_reaction_115602<->Reaction<->115463
Sb01g035380	Sb01g007580	neighbouring_reaction_115694<->Reaction<->115697
Sb01g035380	Sb01g007580	neighbouring_reaction_115697<->Reaction<->115694
Sb01g035380	Sb01g014970	neighbouring_reaction_115463<->Reaction<->115602
Sb01g035380	Sb01g014970	neighbouring_reaction_115602<->Reaction<->115463
Sb01g035380	Sb01g014970	neighbouring_reaction_115694<->Reaction<->115697
Sb01g035380	Sb01g014970	neighbouring_reaction_115697<->Reaction<->115694
Sb01g035380	Sb01g039050	neighbouring_reaction_111286<->Reaction<->111287
Sb01g035380	Sb01g039050	neighbouring_reaction_111287<->Reaction<->111286
Sb01g035380	Sb01g039220	neighbouring_reaction_115463<->Reaction<->115628
Sb01g035380	Sb01g039220	neighbouring_reaction_115628<->Reaction<->115463
Sb01g035380	Sb01g039340	neighbouring_reaction_115463<->Reaction<->115628
Sb01g035380	Sb01g039340	neighbouring_reaction_115628<->Reaction<->115463
Sb01g035380	Sb01g043150	neighbouring_reaction_115463<->Reaction<->115602
Sb01g035380	Sb01g043150	neighbouring_reaction_115602<->Reaction<->115463
Sb01g035380	Sb01g043150	neighbouring_reaction_115694<->Reaction<->115697
Sb01g035380	Sb01g043150	neighbouring_reaction_115697<->Reaction<->115694
Sb01g035380	Sb02g004010	neighbouring_reaction_115697<->Reaction<->115776
Sb01g035380	Sb02g004010	neighbouring_reaction_115776<->Reaction<->115697
Sb01g035380	Sb02g032250	neighbouring_reaction_110534<->Reaction<->115463
Sb01g035380	Sb02g032250	neighbouring_reaction_115463<->Reaction<->110534
Sb01g035380	Sb02g032250	neighbouring_reaction_115697<->Reaction<->115777
Sb01g035380	Sb02g032250	neighbouring_reaction_115777<->Reaction<->115697
Sb01g035380	Sb03g039180	neighbouring_reaction_111286<->Reaction<->111287
Sb01g035380	Sb03g039180	neighbouring_reaction_111287<->Reaction<->111286
Sb01g035380	Sb04g001320	neighbouring_reaction_110534<->Reaction<->115463
Sb01g035380	Sb04g001320	neighbouring_reaction_115463<->Reaction<->110534
Sb01g035380	Sb04g001320	neighbouring_reaction_115697<->Reaction<->115777
Sb01g035380	Sb04g001320	neighbouring_reaction_115777<->Reaction<->115697
Sb01g035380	Sb09g008220	neighbouring_reaction_115463<->Reaction<->115628
Sb01g035380	Sb09g008220	neighbouring_reaction_115628<->Reaction<->115463
Sb01g035870	Sb01g036690	neighbouring_reaction_109063<->Reaction<->112027
Sb01g035870	Sb01g036690	neighbouring_reaction_112027<->Reaction<->109063
Sb01g035870	Sb03g011130	neighbouring_reaction_109063<->Reaction<->112027
Sb01g035870	Sb03g011130	neighbouring_reaction_112027<->Reaction<->109063
Sb01g035870	Sb06g032940	neighbouring_reaction_109063<->Reaction<->112027
Sb01g035870	Sb06g032940	neighbouring_reaction_112027<->Reaction<->109063
Sb01g035890	Sb0067s002010	neighbouring_reaction_115027<->Reaction<->115689
Sb01g035890	Sb0067s002010	neighbouring_reaction_115689<->Reaction<->115027
Sb01g035890	Sb0067s002110	neighbouring_reaction_115027<->Reaction<->115689
Sb01g035890	Sb0067s002110	neighbouring_reaction_115689<->Reaction<->115027
Sb01g035890	Sb0067s002130	neighbouring_reaction_115027<->Reaction<->115689
Sb01g035890	Sb0067s002130	neighbouring_reaction_115689<->Reaction<->115027
Sb01g035890	Sb0067s002240	neighbouring_reaction_115027<->Reaction<->115689
Sb01g035890	Sb0067s002240	neighbouring_reaction_115689<->Reaction<->115027
Sb01g035890	Sb01g007580	neighbouring_reaction_115039<->Reaction<->115602
Sb01g035890	Sb01g007580	neighbouring_reaction_115602<->Reaction<->115039
Sb01g035890	Sb01g007580	neighbouring_reaction_115039<->Reaction<->115602
Sb01g035890	Sb01g007580	neighbouring_reaction_115602<->Reaction<->115039
Sb01g035890	Sb01g007580	neighbouring_reaction_115039<->Reaction<->115602
Sb01g035890	Sb01g007580	neighbouring_reaction_115602<->Reaction<->115039
Sb01g035890	Sb01g007580	neighbouring_reaction_115039<->Reaction<->115602
Sb01g035890	Sb01g007580	neighbouring_reaction_115602<->Reaction<->115039
Sb01g035890	Sb01g007580	neighbouring_reaction_115039<->Reaction<->115602
Sb01g035890	Sb01g007580	neighbouring_reaction_115602<->Reaction<->115039
Sb01g035890	Sb01g008910	neighbouring_reaction_115027<->Reaction<->115689
Sb01g035890	Sb01g008910	neighbouring_reaction_115689<->Reaction<->115027
Sb01g035890	Sb01g014970	neighbouring_reaction_115039<->Reaction<->115602
Sb01g035890	Sb01g014970	neighbouring_reaction_115602<->Reaction<->115039
Sb01g035890	Sb01g035380	neighbouring_reaction_115039<->Reaction<->115463
Sb01g035890	Sb01g035380	neighbouring_reaction_115463<->Reaction<->115039
Sb01g035890	Sb01g043150	neighbouring_reaction_115039<->Reaction<->115602
Sb01g035890	Sb01g043150	neighbouring_reaction_115602<->Reaction<->115039
Sb01g035890	Sb02g030500	neighbouring_reaction_115039<->Reaction<->115460
Sb01g035890	Sb02g030500	neighbouring_reaction_115460<->Reaction<->115039
Sb01g035890	Sb02g032250	neighbouring_reaction_108574<->Reaction<->115039
Sb01g035890	Sb02g032250	neighbouring_reaction_110534<->Reaction<->115039
Sb01g035890	Sb02g032250	neighbouring_reaction_115039<->Reaction<->108574
Sb01g035890	Sb02g032250	neighbouring_reaction_115039<->Reaction<->110534
Sb01g035890	Sb02g032250	neighbouring_reaction_115689<->Reaction<->115777
Sb01g035890	Sb02g032250	neighbouring_reaction_115777<->Reaction<->115689
Sb01g035890	Sb04g001320	neighbouring_reaction_108574<->Reaction<->115039
Sb01g035890	Sb04g001320	neighbouring_reaction_110534<->Reaction<->115039
Sb01g035890	Sb04g001320	neighbouring_reaction_115039<->Reaction<->108574
Sb01g035890	Sb04g001320	neighbouring_reaction_115039<->Reaction<->110534
Sb01g035890	Sb04g001320	neighbouring_reaction_115689<->Reaction<->115777
Sb01g035890	Sb04g001320	neighbouring_reaction_115777<->Reaction<->115689
Sb01g035890	Sb04g021810	neighbouring_reaction_115027<->Reaction<->115689
Sb01g035890	Sb04g021810	neighbouring_reaction_115689<->Reaction<->115027
Sb01g035890	Sb04g021810	neighbouring_reaction_115027<->Reaction<->115689
Sb01g035890	Sb04g021810	neighbouring_reaction_115689<->Reaction<->115027
Sb01g035890	Sb04g021810	neighbouring_reaction_115027<->Reaction<->115689
Sb01g035890	Sb04g021810	neighbouring_reaction_115689<->Reaction<->115027
Sb01g035960	Sb01g008690	neighbouring_reaction_107849<->Reaction<->113037
Sb01g035960	Sb01g008690	neighbouring_reaction_113037<->Reaction<->107849
Sb01g035960	Sb01g008690	neighbouring_reaction_107849<->Reaction<->113037
Sb01g035960	Sb01g008690	neighbouring_reaction_113037<->Reaction<->107849
Sb01g035960	Sb08g003440	neighbouring_reaction_111953<->Reaction<->113037
Sb01g035960	Sb08g003440	neighbouring_reaction_113037<->Reaction<->111953
Sb01g035960	Sb10g000400	neighbouring_reaction_109061<->Reaction<->113037
Sb01g035960	Sb10g000400	neighbouring_reaction_113037<->Reaction<->109061
Sb01g036340	Sb07g005460	neighbouring_reaction_105721<->Reaction<->105728
Sb01g036340	Sb07g005460	neighbouring_reaction_105728<->Reaction<->105721
Sb01g036340	Sb07g005460	neighbouring_reaction_105721<->Reaction<->105728
Sb01g036340	Sb07g005460	neighbouring_reaction_105728<->Reaction<->105721
Sb01g036420	Sb02g023480	neighbouring_reaction_106927<->Reaction<->106931
Sb01g036420	Sb02g023480	neighbouring_reaction_106931<->Reaction<->106927
Sb01g036420	Sb04g004690	neighbouring_reaction_106927<->Reaction<->108881
Sb01g036420	Sb04g004690	neighbouring_reaction_108881<->Reaction<->106927
Sb01g036420	Sb04g004690	neighbouring_reaction_106927<->Reaction<->108881
Sb01g036420	Sb04g004690	neighbouring_reaction_108881<->Reaction<->106927
Sb01g036420	Sb09g024340	neighbouring_reaction_106927<->Reaction<->108881
Sb01g036420	Sb09g024340	neighbouring_reaction_108881<->Reaction<->106927
Sb01g036420	Sb10g026710	neighbouring_reaction_106927<->Reaction<->108881
Sb01g036420	Sb10g026710	neighbouring_reaction_108881<->Reaction<->106927
Sb01g036420	Sb10g026710	neighbouring_reaction_106927<->Reaction<->108881
Sb01g036420	Sb10g026710	neighbouring_reaction_108881<->Reaction<->106927
Sb01g036420	Sb10g026710	neighbouring_reaction_106927<->Reaction<->108881
Sb01g036420	Sb10g026710	neighbouring_reaction_108881<->Reaction<->106927
Sb01g036510	Sb01g036690	neighbouring_reaction_109070<->Reaction<->109351
Sb01g036510	Sb01g036690	neighbouring_reaction_109351<->Reaction<->109070
Sb01g036510	Sb03g011130	neighbouring_reaction_109070<->Reaction<->109351
Sb01g036510	Sb03g011130	neighbouring_reaction_109351<->Reaction<->109070
Sb01g036510	Sb03g044860	neighbouring_reaction_109390<->Reaction<->115098
Sb01g036510	Sb03g044860	neighbouring_reaction_109391<->Reaction<->115098
Sb01g036510	Sb03g044860	neighbouring_reaction_115098<->Reaction<->109390
Sb01g036510	Sb03g044860	neighbouring_reaction_115098<->Reaction<->109391
Sb01g036510	Sb06g021460	neighbouring_reaction_109070<->Reaction<->110744
Sb01g036510	Sb06g021460	neighbouring_reaction_110744<->Reaction<->109070
Sb01g036510	Sb06g032940	neighbouring_reaction_109070<->Reaction<->109351
Sb01g036510	Sb06g032940	neighbouring_reaction_109351<->Reaction<->109070
Sb01g036510	Sb09g018200	neighbouring_reaction_109390<->Reaction<->115098
Sb01g036510	Sb09g018200	neighbouring_reaction_109391<->Reaction<->115098
Sb01g036510	Sb09g018200	neighbouring_reaction_115098<->Reaction<->109390
Sb01g036510	Sb09g018200	neighbouring_reaction_115098<->Reaction<->109391
Sb01g036510	Sb10g009290	neighbouring_reaction_109070<->Reaction<->110744
Sb01g036510	Sb10g009290	neighbouring_reaction_110744<->Reaction<->109070
Sb01g036690	Sb02g021090	neighbouring_reaction_109351<->Reaction<->114269
Sb01g036690	Sb02g021090	neighbouring_reaction_114043<->Reaction<->114269
Sb01g036690	Sb02g021090	neighbouring_reaction_114269<->Reaction<->109351
Sb01g036690	Sb02g021090	neighbouring_reaction_114269<->Reaction<->114043
Sb01g036690	Sb03g013290	neighbouring_reaction_109351<->Reaction<->114645
Sb01g036690	Sb03g013290	neighbouring_reaction_109351<->Reaction<->114646
Sb01g036690	Sb03g013290	neighbouring_reaction_114043<->Reaction<->114645
Sb01g036690	Sb03g013290	neighbouring_reaction_114043<->Reaction<->114646
Sb01g036690	Sb03g013290	neighbouring_reaction_114645<->Reaction<->109351
Sb01g036690	Sb03g013290	neighbouring_reaction_114645<->Reaction<->114043
Sb01g036690	Sb03g013290	neighbouring_reaction_114646<->Reaction<->109351
Sb01g036690	Sb03g013290	neighbouring_reaction_114646<->Reaction<->114043
Sb01g036690	Sb03g035090	neighbouring_reaction_109351<->Reaction<->114269
Sb01g036690	Sb03g035090	neighbouring_reaction_114043<->Reaction<->114269
Sb01g036690	Sb03g035090	neighbouring_reaction_114269<->Reaction<->109351
Sb01g036690	Sb03g035090	neighbouring_reaction_114269<->Reaction<->114043
Sb01g036690	Sb03g041040	neighbouring_reaction_110748<->Reaction<->110749
Sb01g036690	Sb03g041040	neighbouring_reaction_110749<->Reaction<->110748
Sb01g036690	Sb03g041040	neighbouring_reaction_110851<->Reaction<->110852
Sb01g036690	Sb03g041040	neighbouring_reaction_110852<->Reaction<->110851
Sb01g036690	Sb04g008720	neighbouring_reaction_109351<->Reaction<->114269
Sb01g036690	Sb04g008720	neighbouring_reaction_114043<->Reaction<->114269
Sb01g036690	Sb04g008720	neighbouring_reaction_114269<->Reaction<->109351
Sb01g036690	Sb04g008720	neighbouring_reaction_114269<->Reaction<->114043
Sb01g036690	Sb06g021460	neighbouring_reaction_109351<->Reaction<->110744
Sb01g036690	Sb06g021460	neighbouring_reaction_110744<->Reaction<->109351
Sb01g036690	Sb06g021460	neighbouring_reaction_110744<->Reaction<->110749
Sb01g036690	Sb06g021460	neighbouring_reaction_110749<->Reaction<->110744
Sb01g036690	Sb06g021460	neighbouring_reaction_110850<->Reaction<->110852
Sb01g036690	Sb06g021460	neighbouring_reaction_110850<->Reaction<->112027
Sb01g036690	Sb06g021460	neighbouring_reaction_110852<->Reaction<->110850
Sb01g036690	Sb06g021460	neighbouring_reaction_112027<->Reaction<->110850
Sb01g036690	Sb07g014960	neighbouring_reaction_109351<->Reaction<->114269
Sb01g036690	Sb07g014960	neighbouring_reaction_114043<->Reaction<->114269
Sb01g036690	Sb07g014960	neighbouring_reaction_114269<->Reaction<->109351
Sb01g036690	Sb07g014960	neighbouring_reaction_114269<->Reaction<->114043
Sb01g036690	Sb09g004610	neighbouring_reaction_109351<->Reaction<->114645
Sb01g036690	Sb09g004610	neighbouring_reaction_109351<->Reaction<->114646
Sb01g036690	Sb09g004610	neighbouring_reaction_114043<->Reaction<->114645
Sb01g036690	Sb09g004610	neighbouring_reaction_114043<->Reaction<->114646
Sb01g036690	Sb09g004610	neighbouring_reaction_114645<->Reaction<->109351
Sb01g036690	Sb09g004610	neighbouring_reaction_114645<->Reaction<->114043
Sb01g036690	Sb09g004610	neighbouring_reaction_114646<->Reaction<->109351
Sb01g036690	Sb09g004610	neighbouring_reaction_114646<->Reaction<->114043
Sb01g036690	Sb10g009290	neighbouring_reaction_109351<->Reaction<->110744
Sb01g036690	Sb10g009290	neighbouring_reaction_110744<->Reaction<->109351
Sb01g036690	Sb10g009290	neighbouring_reaction_110744<->Reaction<->110749
Sb01g036690	Sb10g009290	neighbouring_reaction_110749<->Reaction<->110744
Sb01g036690	Sb10g009290	neighbouring_reaction_110850<->Reaction<->110852
Sb01g036690	Sb10g009290	neighbouring_reaction_110850<->Reaction<->112027
Sb01g036690	Sb10g009290	neighbouring_reaction_110852<->Reaction<->110850
Sb01g036690	Sb10g009290	neighbouring_reaction_112027<->Reaction<->110850
Sb01g036690	Sb10g021330	neighbouring_reaction_109351<->Reaction<->114269
Sb01g036690	Sb10g021330	neighbouring_reaction_114043<->Reaction<->114269
Sb01g036690	Sb10g021330	neighbouring_reaction_114269<->Reaction<->109351
Sb01g036690	Sb10g021330	neighbouring_reaction_114269<->Reaction<->114043
Sb01g037340	Sb01g006190	direct_complex_114548
Sb01g037340	Sb01g006190	neighbouring_reaction_114523<->Reaction<->114549
Sb01g037340	Sb01g006190	neighbouring_reaction_114549<->Reaction<->114523
Sb01g037340	Sb01g006190	reaction_114549
Sb01g037340	Sb01g009920	neighbouring_reaction_108411<->Reaction<->114532
Sb01g037340	Sb01g009920	neighbouring_reaction_108411<->Reaction<->115253
Sb01g037340	Sb01g009920	neighbouring_reaction_114532<->Reaction<->108411
Sb01g037340	Sb01g009920	neighbouring_reaction_115253<->Reaction<->108411
Sb01g037340	Sb01g009920	neighbouring_reaction_108411<->Reaction<->114532
Sb01g037340	Sb01g009920	neighbouring_reaction_108411<->Reaction<->115253
Sb01g037340	Sb01g009920	neighbouring_reaction_114532<->Reaction<->108411
Sb01g037340	Sb01g009920	neighbouring_reaction_115253<->Reaction<->108411
Sb01g037340	Sb01g013843	direct_complex_114548
Sb01g037340	Sb01g013843	neighbouring_reaction_114523<->Reaction<->114549
Sb01g037340	Sb01g013843	neighbouring_reaction_114549<->Reaction<->114523
Sb01g037340	Sb01g013843	reaction_114549
Sb01g037340	Sb02g002760	direct_complex_114548
Sb01g037340	Sb02g002760	neighbouring_reaction_114523<->Reaction<->114549
Sb01g037340	Sb02g002760	neighbouring_reaction_114549<->Reaction<->114523
Sb01g037340	Sb02g002760	reaction_114549
Sb01g037340	Sb10g010050	direct_complex_114531
Sb01g037340	Sb10g010050	neighbouring_reaction_108411<->Reaction<->114532
Sb01g037340	Sb10g010050	neighbouring_reaction_114532<->Reaction<->108411
Sb01g037340	Sb10g010050	reaction_114532
Sb01g037450	Sb07g002810	direct_complex_111528
Sb01g037450	Sb07g002810	neighbouring_reaction_111529<->Reaction<->115800
Sb01g037450	Sb07g002810	neighbouring_reaction_115800<->Reaction<->111529
Sb01g037450	Sb07g002810	reaction_111529
Sb01g037450	Sb07g002820	direct_complex_111528
Sb01g037450	Sb07g002820	neighbouring_reaction_111529<->Reaction<->115800
Sb01g037450	Sb07g002820	neighbouring_reaction_115800<->Reaction<->111529
Sb01g037450	Sb07g002820	reaction_111529
Sb01g037450	Sb08g016860	indirect_complex_115799
Sb01g037450	Sb08g016860	neighbouring_reaction_111529<->Reaction<->115800
Sb01g037450	Sb08g016860	neighbouring_reaction_115800<->Reaction<->111529
Sb01g037450	Sb08g016860	reaction_115800
Sb01g037450	Sb09g003500	indirect_complex_115799
Sb01g037450	Sb09g003500	neighbouring_reaction_111529<->Reaction<->115800
Sb01g037450	Sb09g003500	neighbouring_reaction_115800<->Reaction<->111529
Sb01g037450	Sb09g003500	reaction_115800
Sb01g037450	Sb10g004560	neighbouring_reaction_111529<->Reaction<->115800
Sb01g037450	Sb10g004560	neighbouring_reaction_115800<->Reaction<->111529
Sb01g037570	Sb06g000580	neighbouring_reaction_113043<->Reaction<->113721
Sb01g037570	Sb06g000580	neighbouring_reaction_113721<->Reaction<->113043
Sb01g037570	Sb08g008320	neighbouring_reaction_109154<->Reaction<->113721
Sb01g037570	Sb08g008320	neighbouring_reaction_113045<->Reaction<->113109
Sb01g037570	Sb08g008320	neighbouring_reaction_113109<->Reaction<->113045
Sb01g037570	Sb08g008320	neighbouring_reaction_113721<->Reaction<->109154
Sb01g037570	Sb09g004730	neighbouring_reaction_109117<->Reaction<->113721
Sb01g037570	Sb09g004730	neighbouring_reaction_113721<->Reaction<->109117
Sb01g037570	Sb09g004730	neighbouring_reaction_109117<->Reaction<->113721
Sb01g037570	Sb09g004730	neighbouring_reaction_113721<->Reaction<->109117
Sb01g037570	Sb10g002070	neighbouring_reaction_113044<->Reaction<->113721
Sb01g037570	Sb10g002070	neighbouring_reaction_113721<->Reaction<->113044
Sb01g037860	Sb01g039050	neighbouring_reaction_115652<->Reaction<->115670
Sb01g037860	Sb01g039050	neighbouring_reaction_115670<->Reaction<->115652
Sb01g037860	Sb03g039180	neighbouring_reaction_115652<->Reaction<->115670
Sb01g037860	Sb03g039180	neighbouring_reaction_115670<->Reaction<->115652
Sb01g038360	Sb01g036690	neighbouring_reaction_106518<->Reaction<->109351
Sb01g038360	Sb01g036690	neighbouring_reaction_109351<->Reaction<->106518
Sb01g038360	Sb01g044580	neighbouring_reaction_108334<->Reaction<->111365
Sb01g038360	Sb01g044580	neighbouring_reaction_111365<->Reaction<->108334
Sb01g038360	Sb02g039600	neighbouring_reaction_108334<->Reaction<->111365
Sb01g038360	Sb02g039600	neighbouring_reaction_111365<->Reaction<->108334
Sb01g038360	Sb02g039600	neighbouring_reaction_108334<->Reaction<->111365
Sb01g038360	Sb02g039600	neighbouring_reaction_111365<->Reaction<->108334
Sb01g038360	Sb02g039600	neighbouring_reaction_108334<->Reaction<->111365
Sb01g038360	Sb02g039600	neighbouring_reaction_111365<->Reaction<->108334
Sb01g038360	Sb02g039610	neighbouring_reaction_108334<->Reaction<->111365
Sb01g038360	Sb02g039610	neighbouring_reaction_111365<->Reaction<->108334
Sb01g038360	Sb02g039610	neighbouring_reaction_108334<->Reaction<->111365
Sb01g038360	Sb02g039610	neighbouring_reaction_111365<->Reaction<->108334
Sb01g038360	Sb02g039610	neighbouring_reaction_108334<->Reaction<->111365
Sb01g038360	Sb02g039610	neighbouring_reaction_111365<->Reaction<->108334
Sb01g038360	Sb03g011130	neighbouring_reaction_106518<->Reaction<->109351
Sb01g038360	Sb03g011130	neighbouring_reaction_109351<->Reaction<->106518
Sb01g038360	Sb06g001120	neighbouring_reaction_106518<->Reaction<->106532
Sb01g038360	Sb06g001120	neighbouring_reaction_106532<->Reaction<->106518
Sb01g038360	Sb06g001120	neighbouring_reaction_106532<->Reaction<->108334
Sb01g038360	Sb06g001120	neighbouring_reaction_108334<->Reaction<->106532
Sb01g038360	Sb06g032940	neighbouring_reaction_106518<->Reaction<->109351
Sb01g038360	Sb06g032940	neighbouring_reaction_109351<->Reaction<->106518
Sb01g038460	Sb01g011080	neighbouring_reaction_109137<->Reaction<->112026
Sb01g038460	Sb01g011080	neighbouring_reaction_112026<->Reaction<->109137
Sb01g038460	Sb01g015190	neighbouring_reaction_109137<->Reaction<->113097
Sb01g038460	Sb01g015190	neighbouring_reaction_113097<->Reaction<->109137
Sb01g038460	Sb01g045540	neighbouring_reaction_109137<->Reaction<->112026
Sb01g038460	Sb01g045540	neighbouring_reaction_112026<->Reaction<->109137
Sb01g038460	Sb03g005710	neighbouring_reaction_109137<->Reaction<->109141
Sb01g038460	Sb03g005710	neighbouring_reaction_109137<->Reaction<->115286
Sb01g038460	Sb03g005710	neighbouring_reaction_109141<->Reaction<->109137
Sb01g038460	Sb03g005710	neighbouring_reaction_115286<->Reaction<->109137
Sb01g038460	Sb03g025320	neighbouring_reaction_109137<->Reaction<->113190
Sb01g038460	Sb03g025320	neighbouring_reaction_109137<->Reaction<->113191
Sb01g038460	Sb03g025320	neighbouring_reaction_113190<->Reaction<->109137
Sb01g038460	Sb03g025320	neighbouring_reaction_113191<->Reaction<->109137
Sb01g038460	Sb04g002810	neighbouring_reaction_109137<->Reaction<->113113
Sb01g038460	Sb04g002810	neighbouring_reaction_113113<->Reaction<->109137
Sb01g038460	Sb04g028690	neighbouring_reaction_109137<->Reaction<->109167
Sb01g038460	Sb04g028690	neighbouring_reaction_109167<->Reaction<->109137
Sb01g038460	Sb04g028690	neighbouring_reaction_109137<->Reaction<->109167
Sb01g038460	Sb04g028690	neighbouring_reaction_109167<->Reaction<->109137
Sb01g038460	Sb04g028690	neighbouring_reaction_109137<->Reaction<->109167
Sb01g038460	Sb04g028690	neighbouring_reaction_109167<->Reaction<->109137
Sb01g038460	Sb07g008570	neighbouring_reaction_109137<->Reaction<->109744
Sb01g038460	Sb07g008570	neighbouring_reaction_109744<->Reaction<->109137
Sb01g038460	Sb07g008570	neighbouring_reaction_109137<->Reaction<->109744
Sb01g038460	Sb07g008570	neighbouring_reaction_109744<->Reaction<->109137
Sb01g038460	Sb08g008320	neighbouring_reaction_109137<->Reaction<->109154
Sb01g038460	Sb08g008320	neighbouring_reaction_109154<->Reaction<->109137
Sb01g038460	Sb01g011080	neighbouring_reaction_109137<->Reaction<->112026
Sb01g038460	Sb01g011080	neighbouring_reaction_112026<->Reaction<->109137
Sb01g038460	Sb01g015190	neighbouring_reaction_109137<->Reaction<->113097
Sb01g038460	Sb01g015190	neighbouring_reaction_113097<->Reaction<->109137
Sb01g038460	Sb01g045540	neighbouring_reaction_109137<->Reaction<->112026
Sb01g038460	Sb01g045540	neighbouring_reaction_112026<->Reaction<->109137
Sb01g038460	Sb03g005710	neighbouring_reaction_109137<->Reaction<->109141
Sb01g038460	Sb03g005710	neighbouring_reaction_109137<->Reaction<->115286
Sb01g038460	Sb03g005710	neighbouring_reaction_109141<->Reaction<->109137
Sb01g038460	Sb03g005710	neighbouring_reaction_115286<->Reaction<->109137
Sb01g038460	Sb03g025320	neighbouring_reaction_109137<->Reaction<->113190
Sb01g038460	Sb03g025320	neighbouring_reaction_109137<->Reaction<->113191
Sb01g038460	Sb03g025320	neighbouring_reaction_113190<->Reaction<->109137
Sb01g038460	Sb03g025320	neighbouring_reaction_113191<->Reaction<->109137
Sb01g038460	Sb04g002810	neighbouring_reaction_109137<->Reaction<->113113
Sb01g038460	Sb04g002810	neighbouring_reaction_113113<->Reaction<->109137
Sb01g038460	Sb04g028690	neighbouring_reaction_109137<->Reaction<->109167
Sb01g038460	Sb04g028690	neighbouring_reaction_109167<->Reaction<->109137
Sb01g038460	Sb04g028690	neighbouring_reaction_109137<->Reaction<->109167
Sb01g038460	Sb04g028690	neighbouring_reaction_109167<->Reaction<->109137
Sb01g038460	Sb04g028690	neighbouring_reaction_109137<->Reaction<->109167
Sb01g038460	Sb04g028690	neighbouring_reaction_109167<->Reaction<->109137
Sb01g038460	Sb07g008570	neighbouring_reaction_109137<->Reaction<->109744
Sb01g038460	Sb07g008570	neighbouring_reaction_109744<->Reaction<->109137
Sb01g038460	Sb07g008570	neighbouring_reaction_109137<->Reaction<->109744
Sb01g038460	Sb07g008570	neighbouring_reaction_109744<->Reaction<->109137
Sb01g038460	Sb08g008320	neighbouring_reaction_109137<->Reaction<->109154
Sb01g038460	Sb08g008320	neighbouring_reaction_109154<->Reaction<->109137
Sb01g038460	Sb01g011080	neighbouring_reaction_109137<->Reaction<->112026
Sb01g038460	Sb01g011080	neighbouring_reaction_112026<->Reaction<->109137
Sb01g038460	Sb01g015190	neighbouring_reaction_109137<->Reaction<->113097
Sb01g038460	Sb01g015190	neighbouring_reaction_113097<->Reaction<->109137
Sb01g038460	Sb01g045540	neighbouring_reaction_109137<->Reaction<->112026
Sb01g038460	Sb01g045540	neighbouring_reaction_112026<->Reaction<->109137
Sb01g038460	Sb03g005710	neighbouring_reaction_109137<->Reaction<->109141
Sb01g038460	Sb03g005710	neighbouring_reaction_109137<->Reaction<->115286
Sb01g038460	Sb03g005710	neighbouring_reaction_109141<->Reaction<->109137
Sb01g038460	Sb03g005710	neighbouring_reaction_115286<->Reaction<->109137
Sb01g038460	Sb03g025320	neighbouring_reaction_109137<->Reaction<->113190
Sb01g038460	Sb03g025320	neighbouring_reaction_109137<->Reaction<->113191
Sb01g038460	Sb03g025320	neighbouring_reaction_113190<->Reaction<->109137
Sb01g038460	Sb03g025320	neighbouring_reaction_113191<->Reaction<->109137
Sb01g038460	Sb04g002810	neighbouring_reaction_109137<->Reaction<->113113
Sb01g038460	Sb04g002810	neighbouring_reaction_113113<->Reaction<->109137
Sb01g038460	Sb04g028690	neighbouring_reaction_109137<->Reaction<->109167
Sb01g038460	Sb04g028690	neighbouring_reaction_109167<->Reaction<->109137
Sb01g038460	Sb04g028690	neighbouring_reaction_109137<->Reaction<->109167
Sb01g038460	Sb04g028690	neighbouring_reaction_109167<->Reaction<->109137
Sb01g038460	Sb04g028690	neighbouring_reaction_109137<->Reaction<->109167
Sb01g038460	Sb04g028690	neighbouring_reaction_109167<->Reaction<->109137
Sb01g038460	Sb07g008570	neighbouring_reaction_109137<->Reaction<->109744
Sb01g038460	Sb07g008570	neighbouring_reaction_109744<->Reaction<->109137
Sb01g038460	Sb07g008570	neighbouring_reaction_109137<->Reaction<->109744
Sb01g038460	Sb07g008570	neighbouring_reaction_109744<->Reaction<->109137
Sb01g038460	Sb08g008320	neighbouring_reaction_109137<->Reaction<->109154
Sb01g038460	Sb08g008320	neighbouring_reaction_109154<->Reaction<->109137
Sb01g038500	Sb03g008750	neighbouring_reaction_105869<->Reaction<->110031
Sb01g038500	Sb03g008750	neighbouring_reaction_105869<->Reaction<->110032
Sb01g038500	Sb03g008750	neighbouring_reaction_110031<->Reaction<->105869
Sb01g038500	Sb03g008750	neighbouring_reaction_110032<->Reaction<->105869
Sb01g038500	Sb03g008760	neighbouring_reaction_105869<->Reaction<->110031
Sb01g038500	Sb03g008760	neighbouring_reaction_105869<->Reaction<->110032
Sb01g038500	Sb03g008760	neighbouring_reaction_110031<->Reaction<->105869
Sb01g038500	Sb03g008760	neighbouring_reaction_110032<->Reaction<->105869
Sb01g038500	Sb03g029820	neighbouring_reaction_105869<->Reaction<->110031
Sb01g038500	Sb03g029820	neighbouring_reaction_105869<->Reaction<->110032
Sb01g038500	Sb03g029820	neighbouring_reaction_110031<->Reaction<->105869
Sb01g038500	Sb03g029820	neighbouring_reaction_110032<->Reaction<->105869
Sb01g038500	Sb03g043200	neighbouring_reaction_105869<->Reaction<->110031
Sb01g038500	Sb03g043200	neighbouring_reaction_105869<->Reaction<->110032
Sb01g038500	Sb03g043200	neighbouring_reaction_110031<->Reaction<->105869
Sb01g038500	Sb03g043200	neighbouring_reaction_110032<->Reaction<->105869
Sb01g038580	Sb01g003140	neighbouring_reaction_111149<->Reaction<->115693
Sb01g038580	Sb01g003140	neighbouring_reaction_115693<->Reaction<->111149
Sb01g038580	Sb02g006330	neighbouring_reaction_111149<->Reaction<->114590
Sb01g038580	Sb02g006330	neighbouring_reaction_114590<->Reaction<->111149
Sb01g038780	Sb01g007840	indirect_complex_109674
Sb01g038780	Sb01g007840	reaction_109675
Sb01g038780	Sb07g003800	indirect_complex_109674
Sb01g038780	Sb07g003800	reaction_109675
Sb01g038850	Sb02g021100	neighbouring_reaction_109884<->Reaction<->110428
Sb01g038850	Sb02g021100	neighbouring_reaction_110428<->Reaction<->109884
Sb01g038850	Sb03g006220	neighbouring_reaction_109884<->Reaction<->110428
Sb01g038850	Sb03g006220	neighbouring_reaction_110428<->Reaction<->109884
Sb01g038850	Sb03g006220	neighbouring_reaction_109884<->Reaction<->110428
Sb01g038850	Sb03g006220	neighbouring_reaction_110428<->Reaction<->109884
Sb01g038850	Sb03g006220	neighbouring_reaction_109884<->Reaction<->110428
Sb01g038850	Sb03g006220	neighbouring_reaction_110428<->Reaction<->109884
Sb01g038850	Sb03g035100	neighbouring_reaction_109884<->Reaction<->110428
Sb01g038850	Sb03g035100	neighbouring_reaction_110428<->Reaction<->109884
Sb01g039220	Sb02g030500	neighbouring_reaction_115460<->Reaction<->115628
Sb01g039220	Sb02g030500	neighbouring_reaction_115628<->Reaction<->115460
Sb01g039230	Sb01g005370	neighbouring_reaction_108369<->Reaction<->113186
Sb01g039230	Sb01g005370	neighbouring_reaction_108369<->Reaction<->113192
Sb01g039230	Sb01g005370	neighbouring_reaction_113186<->Reaction<->108369
Sb01g039230	Sb01g005370	neighbouring_reaction_113192<->Reaction<->108369
Sb01g039230	Sb01g005370	neighbouring_reaction_108369<->Reaction<->113186
Sb01g039230	Sb01g005370	neighbouring_reaction_108369<->Reaction<->113192
Sb01g039230	Sb01g005370	neighbouring_reaction_113186<->Reaction<->108369
Sb01g039230	Sb01g005370	neighbouring_reaction_113192<->Reaction<->108369
Sb01g039230	Sb04g032930	neighbouring_reaction_108369<->Reaction<->109269
Sb01g039230	Sb04g032930	neighbouring_reaction_109269<->Reaction<->108369
Sb01g039230	Sb06g000580	neighbouring_reaction_113043<->Reaction<->113739
Sb01g039230	Sb06g000580	neighbouring_reaction_113739<->Reaction<->113043
Sb01g039230	Sb06g024150	neighbouring_reaction_108369<->Reaction<->113186
Sb01g039230	Sb06g024150	neighbouring_reaction_108369<->Reaction<->113192
Sb01g039230	Sb06g024150	neighbouring_reaction_113186<->Reaction<->108369
Sb01g039230	Sb06g024150	neighbouring_reaction_113192<->Reaction<->108369
Sb01g039230	Sb06g024550	neighbouring_reaction_108369<->Reaction<->109269
Sb01g039230	Sb06g024550	neighbouring_reaction_109269<->Reaction<->108369
Sb01g039230	Sb07g027550	neighbouring_reaction_113738<->Reaction<->113739
Sb01g039230	Sb07g027550	neighbouring_reaction_113739<->Reaction<->113738
Sb01g039230	Sb09g002480	neighbouring_reaction_113184<->Reaction<->113735
Sb01g039230	Sb09g002480	neighbouring_reaction_113735<->Reaction<->113184
Sb01g039340	Sb02g030500	neighbouring_reaction_115460<->Reaction<->115628
Sb01g039340	Sb02g030500	neighbouring_reaction_115628<->Reaction<->115460
Sb01g039350	Sb01g007580	neighbouring_reaction_115602<->Reaction<->115662
Sb01g039350	Sb01g007580	neighbouring_reaction_115662<->Reaction<->115602
Sb01g039350	Sb01g007580	neighbouring_reaction_115602<->Reaction<->115662
Sb01g039350	Sb01g007580	neighbouring_reaction_115662<->Reaction<->115602
Sb01g039350	Sb01g007580	neighbouring_reaction_115602<->Reaction<->115662
Sb01g039350	Sb01g007580	neighbouring_reaction_115662<->Reaction<->115602
Sb01g039350	Sb01g007580	neighbouring_reaction_115602<->Reaction<->115662
Sb01g039350	Sb01g007580	neighbouring_reaction_115662<->Reaction<->115602
Sb01g039350	Sb01g007580	neighbouring_reaction_115602<->Reaction<->115662
Sb01g039350	Sb01g007580	neighbouring_reaction_115662<->Reaction<->115602
Sb01g039350	Sb01g014970	neighbouring_reaction_115602<->Reaction<->115662
Sb01g039350	Sb01g014970	neighbouring_reaction_115662<->Reaction<->115602
Sb01g039350	Sb01g043150	neighbouring_reaction_115602<->Reaction<->115662
Sb01g039350	Sb01g043150	neighbouring_reaction_115662<->Reaction<->115602
Sb01g039350	Sb01g007580	neighbouring_reaction_115602<->Reaction<->115662
Sb01g039350	Sb01g007580	neighbouring_reaction_115662<->Reaction<->115602
Sb01g039350	Sb01g007580	neighbouring_reaction_115602<->Reaction<->115662
Sb01g039350	Sb01g007580	neighbouring_reaction_115662<->Reaction<->115602
Sb01g039350	Sb01g007580	neighbouring_reaction_115602<->Reaction<->115662
Sb01g039350	Sb01g007580	neighbouring_reaction_115662<->Reaction<->115602
Sb01g039350	Sb01g007580	neighbouring_reaction_115602<->Reaction<->115662
Sb01g039350	Sb01g007580	neighbouring_reaction_115662<->Reaction<->115602
Sb01g039350	Sb01g007580	neighbouring_reaction_115602<->Reaction<->115662
Sb01g039350	Sb01g007580	neighbouring_reaction_115662<->Reaction<->115602
Sb01g039350	Sb01g014970	neighbouring_reaction_115602<->Reaction<->115662
Sb01g039350	Sb01g014970	neighbouring_reaction_115662<->Reaction<->115602
Sb01g039350	Sb01g043150	neighbouring_reaction_115602<->Reaction<->115662
Sb01g039350	Sb01g043150	neighbouring_reaction_115662<->Reaction<->115602
Sb01g039570	Sb01g038460	neighbouring_reaction_109124<->Reaction<->109137
Sb01g039570	Sb01g038460	neighbouring_reaction_109137<->Reaction<->109124
Sb01g039570	Sb01g038460	neighbouring_reaction_109124<->Reaction<->109137
Sb01g039570	Sb01g038460	neighbouring_reaction_109137<->Reaction<->109124
Sb01g039570	Sb01g038460	neighbouring_reaction_109124<->Reaction<->109137
Sb01g039570	Sb01g038460	neighbouring_reaction_109137<->Reaction<->109124
Sb01g039570	Sb05g000440	neighbouring_reaction_109124<->Reaction<->109137
Sb01g039570	Sb05g000440	neighbouring_reaction_109137<->Reaction<->109124
Sb01g039570	Sb10g009590	neighbouring_reaction_109124<->Reaction<->109137
Sb01g039570	Sb10g009590	neighbouring_reaction_109137<->Reaction<->109124
Sb01g039900	Sb01g021890	neighbouring_reaction_110612<->Reaction<->111768
Sb01g039900	Sb01g021890	neighbouring_reaction_110612<->Reaction<->111769
Sb01g039900	Sb01g021890	neighbouring_reaction_111768<->Reaction<->110612
Sb01g039900	Sb01g021890	neighbouring_reaction_111769<->Reaction<->110612
Sb01g039900	Sb01g021890	neighbouring_reaction_111780<->Reaction<->113564
Sb01g039900	Sb01g021890	neighbouring_reaction_113564<->Reaction<->111780
Sb01g039900	Sb05g022890	neighbouring_reaction_110612<->Reaction<->111768
Sb01g039900	Sb05g022890	neighbouring_reaction_110612<->Reaction<->111769
Sb01g039900	Sb05g022890	neighbouring_reaction_111768<->Reaction<->110612
Sb01g039900	Sb05g022890	neighbouring_reaction_111769<->Reaction<->110612
Sb01g039900	Sb05g022890	neighbouring_reaction_111780<->Reaction<->113564
Sb01g039900	Sb05g022890	neighbouring_reaction_113564<->Reaction<->111780
Sb01g039900	Sb05g022890	neighbouring_reaction_110612<->Reaction<->111768
Sb01g039900	Sb05g022890	neighbouring_reaction_110612<->Reaction<->111769
Sb01g039900	Sb05g022890	neighbouring_reaction_111768<->Reaction<->110612
[truncated: 10,505 more rows]

## Sheet: Input PPI data for construction
Table S5: Detailed description of sorghum PPI data used as an input for pathway netgwork analysis
Source	Target	Interaction
AAO1	Sb0067s002130	neighbouring_reaction_114992<->Reaction<->105992
AAO1	Sb04g021370	neighbouring_reaction_105850<->Reaction<->114579
AAO1	Sb04g021370	neighbouring_reaction_114579<->Reaction<->105850
AAO1	Sb04g021810	neighbouring_reaction_114992<->Reaction<->105992
AAO1	Sb06g015180	neighbouring_reaction_105850<->Reaction<->114579
AAO1	Sb06g015180	neighbouring_reaction_114579<->Reaction<->105850
AST	Sb01g007230	neighbouring_reaction_113286<->Reaction<->113290
AST	Sb01g007230	neighbouring_reaction_113290<->Reaction<->113286
AST	Sb01g009880	neighbouring_reaction_113098<->Reaction<->113134
AST	Sb01g009880	neighbouring_reaction_113134<->Reaction<->113098
AST	Sb01g014020	neighbouring_reaction_113286<->Reaction<->113291
AST	Sb01g014020	neighbouring_reaction_113291<->Reaction<->113286
AST	Sb01g015190	neighbouring_reaction_113097<->Reaction<->113098
AST	Sb01g015190	neighbouring_reaction_113098<->Reaction<->113097
AST	Sb01g038460	neighbouring_reaction_109137<->Reaction<->113098
AST	Sb01g038460	neighbouring_reaction_113098<->Reaction<->109137
AST	Sb01g040720	neighbouring_reaction_109295<->Reaction<->113098
AST	Sb01g040720	neighbouring_reaction_113098<->Reaction<->109295
AST	Sb01g041700	neighbouring_reaction_113098<->Reaction<->113134
AST	Sb01g041700	neighbouring_reaction_113134<->Reaction<->113098
AST	Sb02g001140	neighbouring_reaction_113286<->Reaction<->113290
AST	Sb02g001140	neighbouring_reaction_113290<->Reaction<->113286
AST	Sb02g021090	neighbouring_reaction_113098<->Reaction<->114269
AST	Sb02g021090	neighbouring_reaction_114269<->Reaction<->113098
AST	Sb03g005710	neighbouring_reaction_109141<->Reaction<->113098
AST	Sb03g005710	neighbouring_reaction_113098<->Reaction<->109141
AST	Sb03g005710	neighbouring_reaction_113098<->Reaction<->115286
AST	Sb03g005710	neighbouring_reaction_115286<->Reaction<->113098
AST	Sb03g035090	neighbouring_reaction_113098<->Reaction<->114269
AST	Sb03g035090	neighbouring_reaction_114269<->Reaction<->113098
AST	Sb04g002810	neighbouring_reaction_113098<->Reaction<->113113
AST	Sb04g002810	neighbouring_reaction_113113<->Reaction<->113098
AST	Sb04g008720	neighbouring_reaction_113098<->Reaction<->114269
AST	Sb04g008720	neighbouring_reaction_114269<->Reaction<->113098
AST	Sb04g026510	neighbouring_reaction_113286<->Reaction<->113291
AST	Sb04g026510	neighbouring_reaction_113291<->Reaction<->113286
AST	Sb04g026520	neighbouring_reaction_113286<->Reaction<->113291
AST	Sb04g026520	neighbouring_reaction_113291<->Reaction<->113286
AST	Sb04g026530	neighbouring_reaction_113286<->Reaction<->113291
AST	Sb04g026530	neighbouring_reaction_113291<->Reaction<->113286
AST	Sb04g026540	neighbouring_reaction_113286<->Reaction<->113291
AST	Sb04g026540	neighbouring_reaction_113291<->Reaction<->113286
AST	Sb04g026550	neighbouring_reaction_113286<->Reaction<->113291
AST	Sb04g026550	neighbouring_reaction_113291<->Reaction<->113286
AST	Sb04g026560	neighbouring_reaction_113286<->Reaction<->113291
AST	Sb04g026560	neighbouring_reaction_113291<->Reaction<->113286
AST	Sb04g028690	neighbouring_reaction_109167<->Reaction<->113098
AST	Sb04g028690	neighbouring_reaction_113098<->Reaction<->109167
AST	Sb05g000440	neighbouring_reaction_109137<->Reaction<->113098
AST	Sb05g000440	neighbouring_reaction_113098<->Reaction<->109137
AST	Sb06g018050	neighbouring_reaction_113098<->Reaction<->113134
AST	Sb06g018050	neighbouring_reaction_113134<->Reaction<->113098
AST	Sb06g018130	neighbouring_reaction_113098<->Reaction<->113134
AST	Sb06g018130	neighbouring_reaction_113134<->Reaction<->113098
AST	Sb06g022740	neighbouring_reaction_113286<->Reaction<->113291
AST	Sb06g022740	neighbouring_reaction_113291<->Reaction<->113286
AST	Sb06g022750	neighbouring_reaction_113286<->Reaction<->113291
AST	Sb06g022750	neighbouring_reaction_113291<->Reaction<->113286
AST	Sb07g008570	neighbouring_reaction_109744<->Reaction<->113098
AST	Sb07g008570	neighbouring_reaction_113098<->Reaction<->109744
AST	Sb07g014960	neighbouring_reaction_113098<->Reaction<->114269
AST	Sb07g014960	neighbouring_reaction_114269<->Reaction<->113098
AST	Sb07g022670	neighbouring_reaction_113098<->Reaction<->113134
AST	Sb07g022670	neighbouring_reaction_113134<->Reaction<->113098
AST	Sb10g009590	neighbouring_reaction_109137<->Reaction<->113098
AST	Sb10g009590	neighbouring_reaction_113098<->Reaction<->109137
AST	Sb10g021330	neighbouring_reaction_113098<->Reaction<->114269
AST	Sb10g021330	neighbouring_reaction_114269<->Reaction<->113098
BPNT1	Sb01g008450	neighbouring_reaction_107095<->Reaction<->109381
BPNT1	Sb01g008450	neighbouring_reaction_109381<->Reaction<->107095
BPNT1	Sb01g015510	neighbouring_reaction_106130<->Reaction<->113711
BPNT1	Sb01g015510	neighbouring_reaction_113711<->Reaction<->106130
BPNT1	Sb06g000880	neighbouring_reaction_107095<->Reaction<->109381
BPNT1	Sb06g000880	neighbouring_reaction_109381<->Reaction<->107095
Indol-3-yl-AO	Sb0067s002110	neighbouring_reaction_105992<->Reaction<->114992
Indol-3-yl-AO	Sb0067s002110	neighbouring_reaction_114992<->Reaction<->105992
Indol-3-yl-AO	Sb0067s002130	neighbouring_reaction_105992<->Reaction<->114992
Indol-3-yl-AO	Sb01g008910	neighbouring_reaction_105992<->Reaction<->114992
Indol-3-yl-AO	Sb01g008910	neighbouring_reaction_114992<->Reaction<->105992
Indol-3-yl-AO	Sb04g021370	neighbouring_reaction_105850<->Reaction<->114579
Indol-3-yl-AO	Sb04g021370	neighbouring_reaction_114579<->Reaction<->105850
Indol-3-yl-AO	Sb04g021810	neighbouring_reaction_105992<->Reaction<->114992
Indol-3-yl-AO	Sb06g015180	neighbouring_reaction_105850<->Reaction<->114579
MDH	Sb02g021090	neighbouring_reaction_105820<->Reaction<->114269
MDH	Sb02g021090	neighbouring_reaction_114269<->Reaction<->105820
MDH	Sb03g003220	neighbouring_reaction_105820<->Reaction<->105836
MDH	Sb03g003220	neighbouring_reaction_105836<->Reaction<->105820
MDH	Sb03g003230	neighbouring_reaction_105820<->Reaction<->105836
MDH	Sb03g003230	neighbouring_reaction_105836<->Reaction<->105820
MDH	Sb03g033250	neighbouring_reaction_105820<->Reaction<->105836
MDH	Sb03g033250	neighbouring_reaction_105836<->Reaction<->105820
MDH	Sb03g034280	neighbouring_reaction_105820<->Reaction<->105836
MDH	Sb03g034280	neighbouring_reaction_105836<->Reaction<->105820
MDH	Sb03g035090	neighbouring_reaction_105820<->Reaction<->114269
MDH	Sb03g035090	neighbouring_reaction_114269<->Reaction<->105820
MDH	Sb03g035220	neighbouring_reaction_105821<->Reaction<->113098
MDH	Sb03g035220	neighbouring_reaction_113098<->Reaction<->105821
MDH	Sb04g008720	neighbouring_reaction_105820<->Reaction<->114269
MDH	Sb04g008720	neighbouring_reaction_114269<->Reaction<->105820
MDH	Sb07g014960	neighbouring_reaction_105820<->Reaction<->114269
MDH	Sb07g014960	neighbouring_reaction_114269<->Reaction<->105820
MDH	Sb09g005810	neighbouring_reaction_105820<->Reaction<->105836
MDH	Sb09g005810	neighbouring_reaction_105836<->Reaction<->105820
MDH	Sb10g021330	neighbouring_reaction_105820<->Reaction<->114269
MDH	Sb10g021330	neighbouring_reaction_114269<->Reaction<->105820
MGDG	Sb02g042960	neighbouring_reaction_110853<->Reaction<->115455
MGDG	Sb06g018220	neighbouring_reaction_108748<->Reaction<->115824
MGDGs	Sb02g042960	neighbouring_reaction_110853<->Reaction<->115455
MGDGs	Sb02g042960	neighbouring_reaction_115455<->Reaction<->110853
MGDGs	Sb06g018220	neighbouring_reaction_115824<->Reaction<->108748
P5CS1	Sb01g005370	neighbouring_reaction_109182<->Reaction<->113186
P5CS1	Sb01g005370	neighbouring_reaction_109182<->Reaction<->113192
P5CS1	Sb01g005370	neighbouring_reaction_113186<->Reaction<->109182
P5CS1	Sb01g005370	neighbouring_reaction_113192<->Reaction<->109182
P5CS1	Sb03g039820	neighbouring_reaction_109182<->Reaction<->113193
P5CS1	Sb03g039820	neighbouring_reaction_113193<->Reaction<->109182
P5CS1	Sb06g024150	neighbouring_reaction_109182<->Reaction<->113186
P5CS1	Sb06g024150	neighbouring_reaction_109182<->Reaction<->113192
P5CS1	Sb06g024150	neighbouring_reaction_113186<->Reaction<->109182
P5CS1	Sb06g024150	neighbouring_reaction_113192<->Reaction<->109182
P5CS1	Sb09g022290	neighbouring_reaction_109182<->Reaction<->113193
P5CS1	Sb09g022290	neighbouring_reaction_113193<->Reaction<->109182
PGK	Sb05g003480	neighbouring_reaction_108880<->Reaction<->110690
PGK	Sb05g003480	neighbouring_reaction_110690<->Reaction<->108880
PLC2	Sb01g008450	neighbouring_reaction_107095<->Reaction<->109381
PLC2	Sb01g015510	neighbouring_reaction_113711<->Reaction<->106130
PRK	Sb02g004280	neighbouring_reaction_109009<->Reaction<->110676
PRK	Sb02g004280	neighbouring_reaction_110676<->Reaction<->109009
PRK	Sb05g003480	neighbouring_reaction_109009<->Reaction<->110690
PRK	Sb05g003480	neighbouring_reaction_110690<->Reaction<->109009
RFS	Sb0067s002010	neighbouring_reaction_105992<->Reaction<->114992
RFS	Sb0067s002010	neighbouring_reaction_114992<->Reaction<->105992
RFS	Sb0067s002110	neighbouring_reaction_105992<->Reaction<->114992
RFS	Sb0067s002110	neighbouring_reaction_114992<->Reaction<->105992
RFS	Sb0067s002130	neighbouring_reaction_105992<->Reaction<->114992
RFS	Sb0067s002130	neighbouring_reaction_114992<->Reaction<->105992
RFS	Sb0067s002240	neighbouring_reaction_105992<->Reaction<->114992
RFS	Sb0067s002240	neighbouring_reaction_114992<->Reaction<->105992
RFS	Sb01g008910	neighbouring_reaction_105992<->Reaction<->114992
RFS	Sb01g008910	neighbouring_reaction_114992<->Reaction<->105992
RFS	Sb04g021810	neighbouring_reaction_105992<->Reaction<->114992
RFS	Sb04g021810	neighbouring_reaction_114992<->Reaction<->105992
RFS	Sb05g026330	neighbouring_reaction_105992<->Reaction<->105996
RFS	Sb05g026330	neighbouring_reaction_105996<->Reaction<->105992
SUS	Sb0067s002010	neighbouring_reaction_115027<->Reaction<->115689
SUS	Sb0067s002010	neighbouring_reaction_115689<->Reaction<->115027
SUS	Sb0067s002110	neighbouring_reaction_115027<->Reaction<->115689
SUS	Sb0067s002110	neighbouring_reaction_115689<->Reaction<->115027
SUS	Sb0067s002130	neighbouring_reaction_115027<->Reaction<->115689
SUS	Sb0067s002130	neighbouring_reaction_115689<->Reaction<->115027
SUS	Sb0067s002240	neighbouring_reaction_115027<->Reaction<->115689
SUS	Sb0067s002240	neighbouring_reaction_115689<->Reaction<->115027
SUS	Sb01g007580	neighbouring_reaction_115039<->Reaction<->115602
SUS	Sb01g007580	neighbouring_reaction_115602<->Reaction<->115039
SUS	Sb01g008910	neighbouring_reaction_115027<->Reaction<->115689
SUS	Sb01g008910	neighbouring_reaction_115689<->Reaction<->115027
SUS	Sb01g014970	neighbouring_reaction_115039<->Reaction<->115602
SUS	Sb01g014970	neighbouring_reaction_115602<->Reaction<->115039
SUS	Sb01g035380	neighbouring_reaction_115039<->Reaction<->115463
SUS	Sb01g035380	neighbouring_reaction_115463<->Reaction<->115039
SUS	Sb01g043150	neighbouring_reaction_115039<->Reaction<->115602
SUS	Sb01g043150	neighbouring_reaction_115602<->Reaction<->115039
SUS	Sb02g030500	neighbouring_reaction_115039<->Reaction<->115460
SUS	Sb02g030500	neighbouring_reaction_115460<->Reaction<->115039
SUS	Sb02g032250	neighbouring_reaction_108574<->Reaction<->115039
SUS	Sb02g032250	neighbouring_reaction_110534<->Reaction<->115039
SUS	Sb02g032250	neighbouring_reaction_115039<->Reaction<->108574
SUS	Sb02g032250	neighbouring_reaction_115039<->Reaction<->110534
SUS	Sb02g032250	neighbouring_reaction_115689<->Reaction<->115777
SUS	Sb02g032250	neighbouring_reaction_115777<->Reaction<->115689
SUS	Sb04g001320	neighbouring_reaction_108574<->Reaction<->115039
SUS	Sb04g001320	neighbouring_reaction_110534<->Reaction<->115039
SUS	Sb04g001320	neighbouring_reaction_115039<->Reaction<->108574
SUS	Sb04g001320	neighbouring_reaction_115039<->Reaction<->110534
SUS	Sb04g001320	neighbouring_reaction_115689<->Reaction<->115777
SUS	Sb04g001320	neighbouring_reaction_115777<->Reaction<->115689
SUS	Sb04g021810	neighbouring_reaction_115027<->Reaction<->115689
SUS	Sb04g021810	neighbouring_reaction_115689<->Reaction<->115027
UGE	Sb01g007580	neighbouring_reaction_115463<->Reaction<->115602
UGE	Sb01g007580	neighbouring_reaction_115602<->Reaction<->115463
UGE	Sb01g007580	neighbouring_reaction_115694<->Reaction<->115697
UGE	Sb01g007580	neighbouring_reaction_115697<->Reaction<->115694
UGE	Sb01g014970	neighbouring_reaction_115463<->Reaction<->115602
UGE	Sb01g014970	neighbouring_reaction_115602<->Reaction<->115463
UGE	Sb01g014970	neighbouring_reaction_115694<->Reaction<->115697
UGE	Sb01g014970	neighbouring_reaction_115697<->Reaction<->115694
UGE	Sb01g039050	neighbouring_reaction_111286<->Reaction<->111287
UGE	Sb01g039050	neighbouring_reaction_111287<->Reaction<->111286
UGE	Sb01g039220	neighbouring_reaction_115463<->Reaction<->115628
UGE	Sb01g039220	neighbouring_reaction_115628<->Reaction<->115463
UGE	Sb01g039340	neighbouring_reaction_115463<->Reaction<->115628
UGE	Sb01g039340	neighbouring_reaction_115628<->Reaction<->115463
UGE	Sb01g043150	neighbouring_reaction_115463<->Reaction<->115602
UGE	Sb01g043150	neighbouring_reaction_115602<->Reaction<->115463
UGE	Sb01g043150	neighbouring_reaction_115694<->Reaction<->115697
UGE	Sb01g043150	neighbouring_reaction_115697<->Reaction<->115694
UGE	Sb02g004010	neighbouring_reaction_115697<->Reaction<->115776
UGE	Sb02g004010	neighbouring_reaction_115776<->Reaction<->115697
UGE	Sb02g032250	neighbouring_reaction_110534<->Reaction<->115463
UGE	Sb02g032250	neighbouring_reaction_115463<->Reaction<->110534
UGE	Sb02g032250	neighbouring_reaction_115697<->Reaction<->115777
UGE	Sb02g032250	neighbouring_reaction_115777<->Reaction<->115697
UGE	Sb03g039180	neighbouring_reaction_111286<->Reaction<->111287
UGE	Sb03g039180	neighbouring_reaction_111287<->Reaction<->111286
UGE	Sb04g001320	neighbouring_reaction_110534<->Reaction<->115463
UGE	Sb04g001320	neighbouring_reaction_115463<->Reaction<->110534
UGE	Sb04g001320	neighbouring_reaction_115697<->Reaction<->115777
UGE	Sb04g001320	neighbouring_reaction_115777<->Reaction<->115697
UGE	Sb09g008220	neighbouring_reaction_115463<->Reaction<->115628
UGE	Sb09g008220	neighbouring_reaction_115628<->Reaction<->115463
XDH	Sb03g040810	neighbouring_reaction_115743<->Reaction<->115806
XDH	Sb03g040810	neighbouring_reaction_115743<->Reaction<->115807
XDH	Sb03g040810	neighbouring_reaction_115806<->Reaction<->115743
XDH	Sb03g040810	neighbouring_reaction_115807<->Reaction<->115743
ZEP	Sb06g018220	neighbouring_reaction_108748<->Reaction<->115824
ZEP	Sb06g018220	neighbouring_reaction_115824<->Reaction<->108748
TBC1	Sb07g026900
Myb	Sb01g028870
TPA	Sb01g039740
DIVARICATA	Sb03g006450
DIVARICATA	Sb06g008585
MBF	Sb10g023010
Myb	Sb05g021820
Myb	Sb03g032530
ARF	Sb05g019540
bZIP	Sb02g026570
AP1	Sb03g032290
EI2	Sb01g011020
ERTF	Sb04g006970
AP2	Sb02g025080
AP2/ERF	Sb04g006970
MADS-box	Sb01g030570
MADS	Sb01g049020
WRKY	Sb03g029920
DIVARICATA	Sb03g006450
UNE10	Sb01g029220
WRKY	Sb02g022280
NCED	Sb01g047540
XDH	Sb01g003880
ABA8'OH	Sb07g022990
MCSU	Sb10g026910
CYP707A1	Sb07g022990
PYR/PYL/RCAR	Sb01g028330
PYR/PYL/RCAR	Sb01g038150
PYR/PYL/RCAR	Sb03g038600
PYR/PYL/RCAR	Sb04g008040
PYR/PYL/RCAR	Sb04g009280
PYR/PYL/RCAR	Sb09g006700
PYR/PYL/RCAR	Sb09g023180
PYR/PYL/RCAR	Sb10g022200
PP2C	Sb01g039890
PP2C	Sb02g022090
PP2C	Sb03g026070
PP2C	Sb03g029890
PP2C	Sb03g032740
PP2C	Sb03g039630
PP2C	Sb06g001720
PP2C	Sb09g026860
PP2C	Sb09g029080
PP2C	Sb09g030600
SnRK2	Sb01g007120
SnRK2	Sb01g033570
SnRK2	Sb02g039640
SnRK2	Sb04g022410
SnRK2	Sb06g033990
SnRK2	Sb08g019700
SnRK2	Sb09g021410
AREB/ABF	Sb01g036810
AREB/ABF	Sb02g026570
AREB/ABF	Sb02g043620
AREB/ABF	Sb03g037740
AREB/ABF	Sb03g040510
AREB/ABF	Sb03g040970
AREB/ABF	Sb06g026410
AREB/ABF	Sb08g003760
AREB/ABF	Sb09g021580
AREB/ABF	Sb09g023920
AREB/ABF	Sb10g007090
LEA14a	Sb07g024160
APX	Sb01g038760
TRAB1	Sb02g026570
CaNB1	Sb01g028750
LEA type-2	Sb02g008820
EIN2	Sb01g011020
GGTase 1	Sb03g006060
HK1	Sb01g010070
Indol-3-yl-AO	Sb01g005670
PP2C-6	Sb03g026070
PP2C-30	Sb01g039890
PP2C-68	Sb02g022090
PP2C-ABI2	Sb09g030600
ADH-1	Sb01g008730
ADH-1	Sb05g009350
ADH-1	Sb05g009360
AOC4	Sb01g031870
ALDH3a22	Sb01g003880
NADP-GAPDH	Sb07g021630
ALDH7a1	Sb02g025790
ALDH3a6	Sb05g005470
ALDH3a6	Sb08g004840
RPE/PPE	Sb01g045920
NADP-GAPDH	Sb07g021630
ALDH7a1	Sb02g025790
ALDH3a14	Sb05g005470
ALDH3a14	Sb08g004840
ALDH3a22	Sb01g003880
ALDH3a22	Sb08g004840
ALDH3a22	Sb02g025790
LEA type-2	Sb02g008820
EIN2	Sb01g011020
GSTs	Sb02g003090
GSTs	Sb01g005990
GSTs	Sb02g022210
BAM1	Sb01g019850
BAM1	Sb01g047500
POX1B/POX3	Sb04g004250
POX1B/POX3	Sb10g027490
AOC4	Sb01g031870
CCD	Sb01g047540
GOLS2	Sb01g037090
P-ATPase	Sb01g048440
HSP90	Sb07g028940
HSP70	Sb01g017050
HsfB2a	Sb06g025710
GOLS2	Sb01g037090
GOLS2	Sb02g043450
Cas	Sb02g028770
COR413IM1	Sb09g028710
LTIP	Sb09g003060
GSTs	Sb02g003090
GSTs	Sb01g005990
GSTs	Sb02g022210
GSTs	Sb02g038130
PLC2	Sb09g002320
POX1B/POX3	Sb10g027490
POX1B/POX3	Sb04g004250
GOLS2	Sb01g037090
GOLS2	Sb02g043450
AECLP	Sb03g030100
AOC4	Sb01g031870
SHP	Sb01g038670
STO	Sb02g030690
ALDH	Sb02g025790
ALDH	Sb05g005470
ALDH	Sb08g004840
GOLS2	Sb01g037090
PLC2	Sb09g002320
ECLP	Sb03g030100
Cas	Sb02g028770
AOC4	Sb01g031870
GSTs	Sb01g005990
GSTs	Sb02g022210
GSTs	Sb02g038130
GSTs	Sb10g022780
GSTs	Sb02g003090
GSTs	Sb02g022210
GSTs	Sb10g022780
POX1B/POX3	Sb04g004250
POX1B/POX3	Sb10g027490
GTFs	Sb01g037090
MAPK5	Sb01g038750
MAPK5	Sb10g003810
PLC2	Sb09g002320
PP2C-9	Sb09g022410
MCSUAK5	Sb10g026910
PPAT	Sb04g002790
STK	Sb01g033570
ECLP	Sb03g030100
ADH1	Sb01g008730
ADH1	Sb05g009350
ADH1	Sb05g009360
ALDH3	Sb05g005470
ALDH3	Sb08g004840
ALDH3	Sb05g005470
ALDH3	Sb08g004840
ALDH3	Sb05g005470
ALDH3	Sb08g004840
ALDH3	Sb01g003880
ALDH3	Sb02g025790
BAM1	Sb01g019850
BAM1	Sb01g047500
CSC	Sb03g034680
CSC	Sb08g017750
CSC	Sb03g034880
Cas	Sb02g028770
GOLS2	Sb01g037090
GOLS2	Sb01g037090
GOLS2	Sb02g043450
GDH	Sb04g000320
GAPDH	Sb07g02130
PLC2	Sb09g002320
RuBisCO	Sb05g027870
RPE/PPE	Sb01g045920
P-ATPase	Sb01g048440
P-ATPase	Sb06g031240
P-ATPase	Sb07g007610
P-ATPase	Sb10g025470
NDUFS	Sb02g037780
RuBisCO	Sb05g027870
RPE/PPE	Sb01g045920
Pol2CTD	Sb03g040355
ALDH3	Sb01g003880
ALDH3	Sb05g005470
ALDH3	Sb08g004840
ADH1	Sb01g008730
ADH1	Sb05g009350
ADH1	Sb05g009360
GSTs	Sb02g003090
GSTs	Sb01g005990
GSTs	Sb02g022210
GSTs	Sb02g038130
GSTs	Sb03g045860
GSTs	Sb10g022780
GDH	Sb04g000320
AHCY	Sb05g014470
ADC	Sb10g002070
MCSU	Sb10g026910
GAPDH	Sb07g021630
GPX2	Sb0010s007790
Pol2CTD	Sb03g040355
BAS1	Sb04g021990
PO	Sb05g001000
PO	Sb04g004250
PO	Sb10g027490
BAS1	Sb04g021990
ADH1	Sb01g008730
ADH1	Sb05g009350
ADH1	Sb05g009360
AOC4	Sb01g031870
ALDH3a22	Sb01g003880
CCD	Sb01g047540
NCED	Sb01g047540
ABA8'OH	Sb07g022990
ZSD1	Sb01g003880
AHCY	Sb05g014470
ALDH3a15	Sb05g005470
ALDH3a15	Sb08g004840
GAPDH	Sb07g021630
ALDH7	Sb02g025790
ALDH3a22	Sb05g005470
ALDH3a1	Sb08g004840

## Sheet: network description for 117 can
Table S5: Network description for 117 candidate genes
#node1	node2	node1_string_internal_id	node2_string_internal_id	node1_external_id	node2_external_id	neighborhood_on_chromosome	gene_fusion	phylogenetic_cooccurrence	homology	coexpression	experimentally_determined_interaction	database_annotated	automated_textmining	combined_score
Sb03g026070.1	Sb01g007120.1	448964	437569	4558.Sb03g026070.1	4558.Sb01g007120.1	0.378	0	0	0	0.121	0.881	0.848	0.445	0.993
Sb09g030600.1	Sb01g007120.1	467913	437569	4558.Sb09g030600.1	4558.Sb01g007120.1	0.378	0	0	0	0.121	0.881	0.848	0.445	0.993
Sb10g022200.1	Sb09g030600.1	469810	467913	4558.Sb10g022200.1	4558.Sb09g030600.1	0	0	0	0	0	0.89	0.8	0.45	0.986
Sb04g008040.1	Sb03g026070.1	452415	448964	4558.Sb04g008040.1	4558.Sb03g026070.1	0	0	0	0	0	0.89	0.8	0.45	0.986
Sb10g022200.1	Sb03g026070.1	469810	448964	4558.Sb10g022200.1	4558.Sb03g026070.1	0	0	0	0	0	0.89	0.8	0.45	0.986
Sb09g030600.1	Sb04g008040.1	467913	452415	4558.Sb09g030600.1	4558.Sb04g008040.1	0	0	0	0	0	0.89	0.8	0.45	0.986
Sb03g039630.1	Sb01g007120.1	450531	437569	4558.Sb03g039630.1	4558.Sb01g007120.1	0.378	0	0	0	0.121	0.741	0.848	0.333	0.983
Sb01g039890.1	Sb01g007120.1	441132	437569	4558.Sb01g039890.1	4558.Sb01g007120.1	0.378	0	0	0	0.121	0.741	0.848	0.333	0.983
Sb03g026070.1	Sb01g028330.1	448964	439774	4558.Sb03g026070.1	4558.Sb01g028330.1	0	0	0	0	0	0.879	0.8	0.319	0.982
Sb09g030600.1	Sb01g028330.1	467913	439774	4558.Sb09g030600.1	4558.Sb01g028330.1	0	0	0	0	0	0.879	0.8	0.319	0.982
Sb09g030600.1	Sb01g033570.1	467913	440406	4558.Sb09g030600.1	4558.Sb01g033570.1	0.378	0	0	0	0.121	0.741	0.848	0.196	0.979
Sb03g026070.1	Sb01g033570.1	448964	440406	4558.Sb03g026070.1	4558.Sb01g033570.1	0.378	0	0	0	0.121	0.741	0.848	0.196	0.979
Sb09g030600.1	Sb02g039640.1	467913	446332	4558.Sb09g030600.1	4558.Sb02g039640.1	0.378	0	0	0	0.121	0.741	0.848	0.196	0.979
Sb03g026070.1	Sb02g039640.1	448964	446332	4558.Sb03g026070.1	4558.Sb02g039640.1	0.378	0	0	0	0.121	0.741	0.848	0.196	0.979
Sb04g022410.1	Sb03g026070.1	453301	448964	4558.Sb04g022410.1	4558.Sb03g026070.1	0.378	0	0	0	0.121	0.611	0.848	0.196	0.969
Sb09g030600.1	Sb04g022410.1	467913	453301	4558.Sb09g030600.1	4558.Sb04g022410.1	0.378	0	0	0	0.121	0.611	0.848	0.196	0.969
Sb10g022200.1	Sb01g039890.1	469810	441132	4558.Sb10g022200.1	4558.Sb01g039890.1	0	0	0	0	0	0.84	0.8	0.099	0.968
Sb10g022200.1	Sb03g039630.1	469810	450531	4558.Sb10g022200.1	4558.Sb03g039630.1	0	0	0	0	0	0.84	0.8	0.099	0.968
Sb04g008040.1	Sb03g039630.1	452415	450531	4558.Sb04g008040.1	4558.Sb03g039630.1	0	0	0	0	0	0.84	0.8	0.099	0.968
Sb04g008040.1	Sb01g039890.1	452415	441132	4558.Sb04g008040.1	4558.Sb01g039890.1	0	0	0	0	0	0.84	0.8	0.099	0.968
Sb09g006700.1	Sb03g026070.1	466074	448964	4558.Sb09g006700.1	4558.Sb03g026070.1	0	0	0	0	0	0.741	0.8	0.325	0.961
Sb04g009280.1	Sb03g026070.1	452571	448964	4558.Sb04g009280.1	4558.Sb03g026070.1	0	0	0	0	0	0.741	0.8	0.325	0.961
Sb03g040510.1	Sb02g026570.1	450625	444818	4558.Sb03g040510.1	4558.Sb02g026570.1	0	0	0	0.769	0	0.959	0	0.29	0.961
Sb09g030600.1	Sb04g009280.1	467913	452571	4558.Sb09g030600.1	4558.Sb04g009280.1	0	0	0	0	0	0.741	0.8	0.325	0.961
Sb09g030600.1	Sb09g006700.1	467913	466074	4558.Sb09g030600.1	4558.Sb09g006700.1	0	0	0	0	0	0.741	0.8	0.325	0.961
Sb05g009350.1	Sb02g025790.1	456333	444721	4558.Sb05g009350.1	4558.Sb02g025790.1	0.06	0	0	0	0.064	0.099	0.926	0.196	0.944
Sb09g030600.1	Sb09g023180.1	467913	467072	4558.Sb09g030600.1	4558.Sb09g023180.1	0	0	0	0	0	0.589	0.8	0.367	0.943
Sb05g009360.1	Sb02g025790.1	456336	444721	4558.Sb05g009360.1	4558.Sb02g025790.1	0.06	0	0	0	0	0.099	0.926	0.196	0.943
PYL5	Sb03g026070.1	450422	448964	4558.Sb03g038600.1	4558.Sb03g026070.1	0	0	0	0	0	0.589	0.8	0.367	0.943
Sb08g004840.1	Sb05g009350.1	463726	456333	4558.Sb08g004840.1	4558.Sb05g009350.1	0.06	0	0	0	0	0.099	0.926	0.196	0.943
Sb03g026070.1	Sb01g038150.1	448964	440927	4558.Sb03g026070.1	4558.Sb01g038150.1	0	0	0	0	0	0.589	0.8	0.367	0.943
Sb08g004840.1	Sb05g009360.1	463726	456336	4558.Sb08g004840.1	4558.Sb05g009360.1	0.06	0	0	0	0	0.099	0.926	0.196	0.943
Sb05g009350.1	Sb05g005470.1	456333	455827	4558.Sb05g009350.1	4558.Sb05g005470.1	0.06	0	0	0	0	0.099	0.926	0.196	0.943
Sb09g030600.1	Sb01g038150.1	467913	440927	4558.Sb09g030600.1	4558.Sb01g038150.1	0	0	0	0	0	0.589	0.8	0.367	0.943
Sb09g030600.1	PYL5	467913	450422	4558.Sb09g030600.1	4558.Sb03g038600.1	0	0	0	0	0	0.589	0.8	0.367	0.943
Sb09g023180.1	Sb03g026070.1	467072	448964	4558.Sb09g023180.1	4558.Sb03g026070.1	0	0	0	0	0	0.589	0.8	0.367	0.943
Sb05g009360.1	Sb05g005470.1	456336	455827	4558.Sb05g009360.1	4558.Sb05g005470.1	0.06	0	0	0	0	0.099	0.926	0.196	0.943
Sb03g039630.1	Sb01g028330.1	450531	439774	4558.Sb03g039630.1	4558.Sb01g028330.1	0	0	0	0	0	0.697	0.8	0.097	0.94
Sb01g039890.1	Sb01g028330.1	441132	439774	4558.Sb01g039890.1	4558.Sb01g028330.1	0	0	0	0	0	0.697	0.8	0.097	0.94
Sb06g033990.1	Sb03g032740.1	460687	449756	4558.Sb06g033990.1	4558.Sb03g032740.1	0.378	0	0	0	0.121	0.111	0.848	0.196	0.93
Sb04g022410.1	Sb03g029890.1	453301	449416	4558.Sb04g022410.1	4558.Sb03g029890.1	0.378	0	0	0	0.121	0.111	0.848	0.196	0.93
Sb09g029080.1	Sb02g039640.1	467736	446332	4558.Sb09g029080.1	4558.Sb02g039640.1	0.378	0	0	0	0.121	0.111	0.848	0.196	0.93
Sb08g019700.1	Sb03g032740.1	464811	449756	4558.Sb08g019700.1	4558.Sb03g032740.1	0.378	0	0	0	0.121	0.111	0.848	0.196	0.93
SAPK4	Sb02g022090.1	466873	444261	4558.Sb09g021410.1	4558.Sb02g022090.1	0.378	0	0	0	0.121	0.111	0.848	0.196	0.93
Sb08g019700.1	Sb06g001720.1	464811	457941	4558.Sb08g019700.1	4558.Sb06g001720.1	0.378	0	0	0	0.121	0.111	0.848	0.196	0.93
Sb03g029890.1	Sb02g039640.1	449416	446332	4558.Sb03g029890.1	4558.Sb02g039640.1	0.378	0	0	0	0.121	0.111	0.848	0.196	0.93
Sb09g030600.1	SAPK4	467913	466873	4558.Sb09g030600.1	4558.Sb09g021410.1	0.378	0	0	0	0.121	0.111	0.848	0.196	0.93
Sb08g019700.1	Sb02g022090.1	464811	444261	4558.Sb08g019700.1	4558.Sb02g022090.1	0.378	0	0	0	0.121	0.111	0.848	0.196	0.93
Sb09g026860.1	Sb01g033570.1	467486	440406	4558.Sb09g026860.1	4558.Sb01g033570.1	0.378	0	0	0	0.121	0.111	0.848	0.196	0.93
Sb06g033990.1	Sb06g001720.1	460687	457941	4558.Sb06g033990.1	4558.Sb06g001720.1	0.378	0	0	0	0.121	0.111	0.848	0.196	0.93
Sb06g001720.1	Sb01g007120.1	457941	437569	4558.Sb06g001720.1	4558.Sb01g007120.1	0.378	0	0	0	0.121	0.111	0.848	0.196	0.93
Sb03g029890.1	Sb01g033570.1	449416	440406	4558.Sb03g029890.1	4558.Sb01g033570.1	0.378	0	0	0	0.121	0.111	0.848	0.196	0.93
SAPK4	Sb06g001720.1	466873	457941	4558.Sb09g021410.1	4558.Sb06g001720.1	0.378	0	0	0	0.121	0.111	0.848	0.196	0.93
Sb04g022410.1	Sb03g039630.1	453301	450531	4558.Sb04g022410.1	4558.Sb03g039630.1	0.378	0	0	0	0.121	0.111	0.848	0.196	0.93
Sb09g030600.1	Sb06g033990.1	467913	460687	4558.Sb09g030600.1	4558.Sb06g033990.1	0.378	0	0	0	0.121	0.111	0.848	0.196	0.93
Sb09g029080.1	Sb06g033990.1	467736	460687	4558.Sb09g029080.1	4558.Sb06g033990.1	0.378	0	0	0	0.121	0.111	0.848	0.196	0.93
Sb09g026860.1	Sb08g019700.1	467486	464811	4558.Sb09g026860.1	4558.Sb08g019700.1	0.378	0	0	0	0.121	0.111	0.848	0.196	0.93
SAPK4	Sb01g039890.1	466873	441132	4558.Sb09g021410.1	4558.Sb01g039890.1	0.378	0	0	0	0.121	0.111	0.848	0.196	0.93
Sb04g022410.1	Sb03g032740.1	453301	449756	4558.Sb04g022410.1	4558.Sb03g032740.1	0.378	0	0	0	0.121	0.111	0.848	0.196	0.93
Sb09g026860.1	Sb06g033990.1	467486	460687	4558.Sb09g026860.1	4558.Sb06g033990.1	0.378	0	0	0	0.121	0.111	0.848	0.196	0.93
Sb08g019700.1	Sb03g026070.1	464811	448964	4558.Sb08g019700.1	4558.Sb03g026070.1	0.378	0	0	0	0.121	0.111	0.848	0.196	0.93
Sb04g022410.1	Sb01g039890.1	453301	441132	4558.Sb04g022410.1	4558.Sb01g039890.1	0.378	0	0	0	0.121	0.111	0.848	0.196	0.93
SAPK4	Sb03g026070.1	466873	448964	4558.Sb09g021410.1	4558.Sb03g026070.1	0.378	0	0	0	0.121	0.111	0.848	0.196	0.93
Sb03g032740.1	Sb01g033570.1	449756	440406	4558.Sb03g032740.1	4558.Sb01g033570.1	0.378	0	0	0	0.121	0.111	0.848	0.196	0.93
Sb06g033990.1	Sb03g029890.1	460687	449416	4558.Sb06g033990.1	4558.Sb03g029890.1	0.378	0	0	0	0.121	0.111	0.848	0.196	0.93
Sb02g022090.1	Sb01g007120.1	444261	437569	4558.Sb02g022090.1	4558.Sb01g007120.1	0.378	0	0	0	0.121	0.111	0.848	0.196	0.93
Sb02g039640.1	Sb02g022090.1	446332	444261	4558.Sb02g039640.1	4558.Sb02g022090.1	0.378	0	0	0	0.121	0.111	0.848	0.196	0.93
Sb08g019700.1	Sb03g029890.1	464811	449416	4558.Sb08g019700.1	4558.Sb03g029890.1	0.378	0	0	0	0.121	0.111	0.848	0.196	0.93
Sb06g033990.1	Sb03g039630.1	460687	450531	4558.Sb06g033990.1	4558.Sb03g039630.1	0.378	0	0	0	0.121	0.111	0.848	0.196	0.93
Sb06g033990.1	Sb01g039890.1	460687	441132	4558.Sb06g033990.1	4558.Sb01g039890.1	0.378	0	0	0	0.121	0.111	0.848	0.196	0.93
Sb09g029080.1	SAPK4	467736	466873	4558.Sb09g029080.1	4558.Sb09g021410.1	0.378	0	0	0	0.121	0.111	0.848	0.196	0.93
Sb06g033990.1	Sb03g026070.1	460687	448964	4558.Sb06g033990.1	4558.Sb03g026070.1	0.378	0	0	0	0.121	0.111	0.848	0.196	0.93
Sb06g001720.1	Sb04g022410.1	457941	453301	4558.Sb06g001720.1	4558.Sb04g022410.1	0.378	0	0	0	0.121	0.111	0.848	0.196	0.93
Sb01g039890.1	Sb01g033570.1	441132	440406	4558.Sb01g039890.1	4558.Sb01g033570.1	0.378	0	0	0	0.121	0.111	0.848	0.196	0.93
Sb08g019700.1	Sb01g039890.1	464811	441132	4558.Sb08g019700.1	4558.Sb01g039890.1	0.378	0	0	0	0.121	0.111	0.848	0.196	0.93
Sb03g039630.1	Sb01g033570.1	450531	440406	4558.Sb03g039630.1	4558.Sb01g033570.1	0.378	0	0	0	0.121	0.111	0.848	0.196	0.93
SAPK4	Sb03g029890.1	466873	449416	4558.Sb09g021410.1	4558.Sb03g029890.1	0.378	0	0	0	0.121	0.111	0.848	0.196	0.93
Sb02g039640.1	Sb01g039890.1	446332	441132	4558.Sb02g039640.1	4558.Sb01g039890.1	0.378	0	0	0	0.121	0.111	0.848	0.196	0.93
Sb04g022410.1	Sb02g022090.1	453301	444261	4558.Sb04g022410.1	4558.Sb02g022090.1	0.378	0	0	0	0.121	0.111	0.848	0.196	0.93
Sb06g001720.1	Sb01g033570.1	457941	440406	4558.Sb06g001720.1	4558.Sb01g033570.1	0.378	0	0	0	0.121	0.111	0.848	0.196	0.93
Sb09g026860.1	Sb04g022410.1	467486	453301	4558.Sb09g026860.1	4558.Sb04g022410.1	0.378	0	0	0	0.121	0.111	0.848	0.196	0.93
SAPK4	Sb03g039630.1	466873	450531	4558.Sb09g021410.1	4558.Sb03g039630.1	0.378	0	0	0	0.121	0.111	0.848	0.196	0.93
Sb09g026860.1	SAPK4	467486	466873	4558.Sb09g026860.1	4558.Sb09g021410.1	0.378	0	0	0	0.121	0.111	0.848	0.196	0.93
Sb08g019700.1	Sb03g039630.1	464811	450531	4558.Sb08g019700.1	4558.Sb03g039630.1	0.378	0	0	0	0.121	0.111	0.848	0.196	0.93
Sb03g029890.1	Sb01g007120.1	449416	437569	4558.Sb03g029890.1	4558.Sb01g007120.1	0.378	0	0	0	0.121	0.111	0.848	0.196	0.93
Sb09g029080.1	Sb01g007120.1	467736	437569	4558.Sb09g029080.1	4558.Sb01g007120.1	0.378	0	0	0	0.121	0.111	0.848	0.196	0.93
Sb09g029080.1	Sb01g033570.1	467736	440406	4558.Sb09g029080.1	4558.Sb01g033570.1	0.378	0	0	0	0.121	0.111	0.848	0.196	0.93
Sb09g026860.1	Sb02g039640.1	467486	446332	4558.Sb09g026860.1	4558.Sb02g039640.1	0.378	0	0	0	0.121	0.111	0.848	0.196	0.93
Sb09g030600.1	Sb08g019700.1	467913	464811	4558.Sb09g030600.1	4558.Sb08g019700.1	0.378	0	0	0	0.121	0.111	0.848	0.196	0.93
Sb03g039630.1	Sb02g039640.1	450531	446332	4558.Sb03g039630.1	4558.Sb02g039640.1	0.378	0	0	0	0.121	0.111	0.848	0.196	0.93
SAPK4	Sb03g032740.1	466873	449756	4558.Sb09g021410.1	4558.Sb03g032740.1	0.378	0	0	0	0.121	0.111	0.848	0.196	0.93
Sb06g001720.1	Sb02g039640.1	457941	446332	4558.Sb06g001720.1	4558.Sb02g039640.1	0.378	0	0	0	0.121	0.111	0.848	0.196	0.93
Sb09g029080.1	Sb04g022410.1	467736	453301	4558.Sb09g029080.1	4558.Sb04g022410.1	0.378	0	0	0	0.121	0.111	0.848	0.196	0.93
Sb03g032740.1	Sb02g039640.1	449756	446332	4558.Sb03g032740.1	4558.Sb02g039640.1	0.378	0	0	0	0.121	0.111	0.848	0.196	0.93
Sb09g026860.1	Sb01g007120.1	467486	437569	4558.Sb09g026860.1	4558.Sb01g007120.1	0.378	0	0	0	0.121	0.111	0.848	0.196	0.93
Sb09g029080.1	Sb08g019700.1	467736	464811	4558.Sb09g029080.1	4558.Sb08g019700.1	0.378	0	0	0	0.121	0.111	0.848	0.196	0.93
Sb03g032740.1	Sb01g007120.1	449756	437569	4558.Sb03g032740.1	4558.Sb01g007120.1	0.378	0	0	0	0.121	0.111	0.848	0.196	0.93
Sb06g033990.1	Sb02g022090.1	460687	444261	4558.Sb06g033990.1	4558.Sb02g022090.1	0.378	0	0	0	0.121	0.111	0.848	0.196	0.93
Sb02g022090.1	Sb01g033570.1	444261	440406	4558.Sb02g022090.1	4558.Sb01g033570.1	0.378	0	0	0	0.121	0.111	0.848	0.196	0.93
Sb04g009280.1	Sb01g039890.1	452571	441132	4558.Sb04g009280.1	4558.Sb01g039890.1	0	0	0	0	0	0.593	0.8	0.075	0.918
Sb09g022410.1	Sb01g007120.1	466989	437569	4558.Sb09g022410.1	4558.Sb01g007120.1	0.378	0	0	0	0.121	0.741	0.274	0.333	0.918
Sb09g006700.1	Sb01g039890.1	466074	441132	4558.Sb09g006700.1	4558.Sb01g039890.1	0	0	0	0	0	0.593	0.8	0.075	0.918
Sb04g009280.1	Sb03g039630.1	452571	450531	4558.Sb04g009280.1	4558.Sb03g039630.1	0	0	0	0	0	0.593	0.8	0.075	0.918
Sb09g006700.1	Sb03g039630.1	466074	450531	4558.Sb09g006700.1	4558.Sb03g039630.1	0	0	0	0	0	0.593	0.8	0.075	0.918
Sb09g023180.1	Sb03g039630.1	467072	450531	4558.Sb09g023180.1	4558.Sb03g039630.1	0	0	0	0	0	0.571	0.8	0.097	0.915
Sb09g023180.1	Sb01g039890.1	467072	441132	4558.Sb09g023180.1	4558.Sb01g039890.1	0	0	0	0	0	0.571	0.8	0.097	0.915
Sb03g039630.1	Sb01g038150.1	450531	440927	4558.Sb03g039630.1	4558.Sb01g038150.1	0	0	0	0	0	0.571	0.8	0.097	0.915
Sb03g039630.1	PYL5	450531	450422	4558.Sb03g039630.1	4558.Sb03g038600.1	0	0	0	0	0	0.571	0.8	0.097	0.915
Sb01g039890.1	Sb01g038150.1	441132	440927	4558.Sb01g039890.1	4558.Sb01g038150.1	0	0	0	0	0	0.571	0.8	0.097	0.915
PYL5	Sb01g039890.1	450422	441132	4558.Sb03g038600.1	4558.Sb01g039890.1	0	0	0	0	0	0.571	0.8	0.097	0.915
Sb08g003760.1	Sb01g007120.1	463596	437569	4558.Sb08g003760.1	4558.Sb01g007120.1	0	0	0	0	0	0.297	0.8	0.44	0.914
Sb03g045860.1	Sb0010s007790.1	451231	436510	4558.Sb03g045860.1	4558.Sb0010s007790.1	0	0	0	0	0	0	0.9	0.069	0.902
Sb02g022210.1	Sb0010s007790.1	444277	436510	4558.Sb02g022210.1	4558.Sb0010s007790.1	0	0	0	0	0	0	0.9	0.069	0.902
Sb02g003090.1	Sb0010s007790.1	442727	436510	4558.Sb02g003090.1	4558.Sb0010s007790.1	0	0	0	0	0	0	0.9	0.069	0.902
Sb01g005990.1	Sb0010s007790.1	437447	436510	4558.Sb01g005990.1	4558.Sb0010s007790.1	0	0	0	0	0	0	0.9	0.069	0.902
Sb10g022780.1	Sb0010s007790.1	469886	436510	4558.Sb10g022780.1	4558.Sb0010s007790.1	0	0	0	0	0	0	0.9	0.069	0.902
Sb02g038130.1	Sb0010s007790.1	446149	436510	4558.Sb02g038130.1	4558.Sb0010s007790.1	0	0	0	0	0	0	0.9	0.069	0.902
Sb03g040510.1	Sb01g007120.1	450625	437569	4558.Sb03g040510.1	4558.Sb01g007120.1	0	0	0	0	0	0.13	0.8	0.46	0.897
Sb03g037740.1	Sb01g007120.1	450332	437569	4558.Sb03g037740.1	4558.Sb01g007120.1	0	0	0	0	0	0.349	0.8	0.057	0.866
Sb09g023920.1	Sb01g007120.1	467157	437569	4558.Sb09g023920.1	4558.Sb01g007120.1	0	0	0	0	0	0.349	0.8	0.057	0.866
Sb04g022410.1	Sb03g037740.1	453301	450332	4558.Sb04g022410.1	4558.Sb03g037740.1	0	0	0	0	0	0.286	0.8	0.046	0.851
Sb09g023920.1	Sb04g022410.1	467157	453301	4558.Sb09g023920.1	4558.Sb04g022410.1	0	0	0	0	0	0.286	0.8	0.046	0.851
Sb09g022410.1	Sb04g008040.1	466989	452415	4558.Sb09g022410.1	4558.Sb04g008040.1	0	0	0	0	0	0.84	0	0.099	0.849
Sb10g022200.1	Sb09g022410.1	469810	466989	4558.Sb10g022200.1	4558.Sb09g022410.1	0	0	0	0	0	0.84	0	0.099	0.849
Sb09g026860.1	Sb04g008040.1	467486	452415	4558.Sb09g026860.1	4558.Sb04g008040.1	0	0	0	0	0	0.224	0.8	0.099	0.847
Sb10g022200.1	Sb06g001720.1	469810	457941	4558.Sb10g022200.1	4558.Sb06g001720.1	0	0	0	0	0	0.224	0.8	0.099	0.847
Sb10g022200.1	Sb09g029080.1	469810	467736	4558.Sb10g022200.1	4558.Sb09g029080.1	0	0	0	0	0	0.224	0.8	0.099	0.847
Sb10g022200.1	Sb03g029890.1	469810	449416	4558.Sb10g022200.1	4558.Sb03g029890.1	0	0	0	0	0	0.224	0.8	0.099	0.847
Sb04g008040.1	Sb03g029890.1	452415	449416	4558.Sb04g008040.1	4558.Sb03g029890.1	0	0	0	0	0	0.224	0.8	0.099	0.847
Sb04g008040.1	Sb03g032740.1	452415	449756	4558.Sb04g008040.1	4558.Sb03g032740.1	0	0	0	0	0	0.224	0.8	0.099	0.847
Sb04g008040.1	Sb02g022090.1	452415	444261	4558.Sb04g008040.1	4558.Sb02g022090.1	0	0	0	0	0	0.224	0.8	0.099	0.847
Sb06g001720.1	Sb04g008040.1	457941	452415	4558.Sb06g001720.1	4558.Sb04g008040.1	0	0	0	0	0	0.224	0.8	0.099	0.847
Sb09g029080.1	Sb04g008040.1	467736	452415	4558.Sb09g029080.1	4558.Sb04g008040.1	0	0	0	0	0	0.224	0.8	0.099	0.847
Sb10g022200.1	Sb02g022090.1	469810	444261	4558.Sb10g022200.1	4558.Sb02g022090.1	0	0	0	0	0	0.224	0.8	0.099	0.847
Sb10g022200.1	Sb03g032740.1	469810	449756	4558.Sb10g022200.1	4558.Sb03g032740.1	0	0	0	0	0	0.224	0.8	0.099	0.847
Sb10g022200.1	Sb09g026860.1	469810	467486	4558.Sb10g022200.1	4558.Sb09g026860.1	0	0	0	0	0	0.224	0.8	0.099	0.847
Sb09g026860.1	Sb01g028330.1	467486	439774	4558.Sb09g026860.1	4558.Sb01g028330.1	0	0	0	0	0	0.202	0.8	0.045	0.834
Sb09g029080.1	Sb09g006700.1	467736	466074	4558.Sb09g029080.1	4558.Sb09g006700.1	0	0	0	0	0	0.18	0.8	0.073	0.834
Sb03g032740.1	Sb01g028330.1	449756	439774	4558.Sb03g032740.1	4558.Sb01g028330.1	0	0	0	0	0	0.202	0.8	0.045	0.834
Sb03g029890.1	Sb01g028330.1	449416	439774	4558.Sb03g029890.1	4558.Sb01g028330.1	0	0	0	0	0	0.202	0.8	0.045	0.834
Sb02g022090.1	Sb01g028330.1	444261	439774	4558.Sb02g022090.1	4558.Sb01g028330.1	0	0	0	0	0	0.202	0.8	0.045	0.834
Sb06g001720.1	Sb01g028330.1	457941	439774	4558.Sb06g001720.1	4558.Sb01g028330.1	0	0	0	0	0	0.202	0.8	0.045	0.834
Sb04g009280.1	Sb03g029890.1	452571	449416	4558.Sb04g009280.1	4558.Sb03g029890.1	0	0	0	0	0	0.18	0.8	0.073	0.834
Sb09g006700.1	Sb03g029890.1	466074	449416	4558.Sb09g006700.1	4558.Sb03g029890.1	0	0	0	0	0	0.18	0.8	0.073	0.834
Sb09g029080.1	Sb01g028330.1	467736	439774	4558.Sb09g029080.1	4558.Sb01g028330.1	0	0	0	0	0	0.202	0.8	0.045	0.834
Sb09g029080.1	Sb04g009280.1	467736	452571	4558.Sb09g029080.1	4558.Sb04g009280.1	0	0	0	0	0	0.18	0.8	0.073	0.834
Sb09g026860.1	Sb09g006700.1	467486	466074	4558.Sb09g026860.1	4558.Sb09g006700.1	0	0	0	0	0	0.18	0.8	0.047	0.83
Sb09g006700.1	Sb02g022090.1	466074	444261	4558.Sb09g006700.1	4558.Sb02g022090.1	0	0	0	0	0	0.18	0.8	0.047	0.83
Sb04g009280.1	Sb03g032740.1	452571	449756	4558.Sb04g009280.1	4558.Sb03g032740.1	0	0	0	0	0	0.18	0.8	0.047	0.83
Sb04g009280.1	Sb02g022090.1	452571	444261	4558.Sb04g009280.1	4558.Sb02g022090.1	0	0	0	0	0	0.18	0.8	0.047	0.83
Sb09g006700.1	Sb06g001720.1	466074	457941	4558.Sb09g006700.1	4558.Sb06g001720.1	0	0	0	0	0	0.18	0.8	0.047	0.83
Sb06g001720.1	Sb04g009280.1	457941	452571	4558.Sb06g001720.1	4558.Sb04g009280.1	0	0	0	0	0	0.18	0.8	0.047	0.83
Sb09g026860.1	Sb04g009280.1	467486	452571	4558.Sb09g026860.1	4558.Sb04g009280.1	0	0	0	0	0	0.18	0.8	0.047	0.83
Sb09g006700.1	Sb03g032740.1	466074	449756	4558.Sb09g006700.1	4558.Sb03g032740.1	0	0	0	0	0	0.18	0.8	0.047	0.83
Sb07g028940.1	Sb01g017050.1	463112	438701	4558.Sb07g028940.1	4558.Sb01g017050.1	0	0	0	0	0.326	0.567	0	0.464	0.829
Sb08g003760.1	Sb02g039640.1	463596	446332	4558.Sb08g003760.1	4558.Sb02g039640.1	0	0	0	0	0	0.111	0.8	0.119	0.829
Sb09g023180.1	Sb03g029890.1	467072	449416	4558.Sb09g023180.1	4558.Sb03g029890.1	0	0	0	0	0	0.114	0.8	0.097	0.826
Sb09g023180.1	Sb03g032740.1	467072	449756	4558.Sb09g023180.1	4558.Sb03g032740.1	0	0	0	0	0	0.114	0.8	0.097	0.826
PYL5	Sb03g032740.1	450422	449756	4558.Sb03g038600.1	4558.Sb03g032740.1	0	0	0	0	0	0.114	0.8	0.097	0.826
Sb09g029080.1	PYL5	467736	450422	4558.Sb09g029080.1	4558.Sb03g038600.1	0	0	0	0	0	0.114	0.8	0.097	0.826
Sb02g022090.1	Sb01g038150.1	444261	440927	4558.Sb02g022090.1	4558.Sb01g038150.1	0	0	0	0	0	0.114	0.8	0.097	0.826
Sb03g032740.1	Sb01g038150.1	449756	440927	4558.Sb03g032740.1	4558.Sb01g038150.1	0	0	0	0	0	0.114	0.8	0.097	0.826
Sb09g023180.1	Sb06g001720.1	467072	457941	4558.Sb09g023180.1	4558.Sb06g001720.1	0	0	0	0	0	0.114	0.8	0.097	0.826
PYL5	Sb02g022090.1	450422	444261	4558.Sb03g038600.1	4558.Sb02g022090.1	0	0	0	0	0	0.114	0.8	0.097	0.826
Sb06g001720.1	Sb01g038150.1	457941	440927	4558.Sb06g001720.1	4558.Sb01g038150.1	0	0	0	0	0	0.114	0.8	0.097	0.826
Sb03g029890.1	Sb01g038150.1	449416	440927	4558.Sb03g029890.1	4558.Sb01g038150.1	0	0	0	0	0	0.114	0.8	0.097	0.826
Sb09g029080.1	Sb01g038150.1	467736	440927	4558.Sb09g029080.1	4558.Sb01g038150.1	0	0	0	0	0	0.114	0.8	0.097	0.826
Sb09g026860.1	Sb01g038150.1	467486	440927	4558.Sb09g026860.1	4558.Sb01g038150.1	0	0	0	0	0	0.114	0.8	0.097	0.826
Sb09g023180.1	Sb02g022090.1	467072	444261	4558.Sb09g023180.1	4558.Sb02g022090.1	0	0	0	0	0	0.114	0.8	0.097	0.826
PYL5	Sb03g029890.1	450422	449416	4558.Sb03g038600.1	4558.Sb03g029890.1	0	0	0	0	0	0.114	0.8	0.097	0.826
Sb09g026860.1	Sb09g023180.1	467486	467072	4558.Sb09g026860.1	4558.Sb09g023180.1	0	0	0	0	0	0.114	0.8	0.097	0.826
Sb06g001720.1	PYL5	457941	450422	4558.Sb06g001720.1	4558.Sb03g038600.1	0	0	0	0	0	0.114	0.8	0.097	0.826
Sb09g029080.1	Sb09g023180.1	467736	467072	4558.Sb09g029080.1	4558.Sb09g023180.1	0	0	0	0	0	0.114	0.8	0.097	0.826
Sb09g026860.1	PYL5	467486	450422	4558.Sb09g026860.1	4558.Sb03g038600.1	0	0	0	0	0	0.114	0.8	0.097	0.826
Sb08g003760.1	Sb01g033570.1	463596	440406	4558.Sb08g003760.1	4558.Sb01g033570.1	0	0	0	0	0	0.111	0.8	0.098	0.825
SAPK4	Sb08g003760.1	466873	463596	4558.Sb09g021410.1	4558.Sb08g003760.1	0	0	0	0	0	0.111	0.8	0.079	0.821
Sb08g003760.1	Sb04g022410.1	463596	453301	4558.Sb08g003760.1	4558.Sb04g022410.1	0	0	0	0	0	0.111	0.8	0.079	0.821
Sb08g003760.1	Sb06g033990.1	463596	460687	4558.Sb08g003760.1	4558.Sb06g033990.1	0	0	0	0	0	0.111	0.8	0.079	0.821
Sb08g019700.1	Sb08g003760.1	464811	463596	4558.Sb08g019700.1	4558.Sb08g003760.1	0	0	0	0	0	0.111	0.8	0.079	0.821
Sb04g022410.1	Sb03g040510.1	453301	450625	4558.Sb04g022410.1	4558.Sb03g040510.1	0	0	0	0	0	0.13	0.8	0.046	0.819
Sb04g022410.1	Sb02g026570.1	453301	444818	4558.Sb04g022410.1	4558.Sb02g026570.1	0	0	0	0	0	0.13	0.8	0.045	0.819
SAPK4	Sb03g040510.1	466873	450625	4558.Sb09g021410.1	4558.Sb03g040510.1	0	0	0	0	0	0.13	0.8	0.046	0.819
Sb06g033990.1	Sb03g040510.1	460687	450625	4558.Sb06g033990.1	4558.Sb03g040510.1	0	0	0	0	0	0.13	0.8	0.046	0.819
Sb08g019700.1	Sb03g040510.1	464811	450625	4558.Sb08g019700.1	4558.Sb03g040510.1	0	0	0	0	0	0.13	0.8	0.046	0.819
Sb03g040510.1	Sb01g033570.1	450625	440406	4558.Sb03g040510.1	4558.Sb01g033570.1	0	0	0	0	0	0.13	0.8	0.046	0.819
Sb03g040510.1	Sb02g039640.1	450625	446332	4558.Sb03g040510.1	4558.Sb02g039640.1	0	0	0	0	0	0.13	0.8	0.046	0.819
Sb06g033990.1	Sb02g026570.1	460687	444818	4558.Sb06g033990.1	4558.Sb02g026570.1	0	0	0	0	0	0.13	0.8	0	0.818
Sb02g026570.1	Sb01g007120.1	444818	437569	4558.Sb02g026570.1	4558.Sb01g007120.1	0	0	0	0	0	0.13	0.8	0	0.818
Sb02g039640.1	Sb02g026570.1	446332	444818	4558.Sb02g039640.1	4558.Sb02g026570.1	0	0	0	0	0	0.13	0.8	0	0.818
SAPK4	Sb02g026570.1	466873	444818	4558.Sb09g021410.1	4558.Sb02g026570.1	0	0	0	0	0	0.13	0.8	0	0.818
Sb02g026570.1	Sb01g033570.1	444818	440406	4558.Sb02g026570.1	4558.Sb01g033570.1	0	0	0	0	0	0.13	0.8	0	0.818
Sb08g019700.1	Sb02g026570.1	464811	444818	4558.Sb08g019700.1	4558.Sb02g026570.1	0	0	0	0	0	0.13	0.8	0	0.818
Sb10g007090.1	SAPK4	468773	466873	4558.Sb10g007090.1	4558.Sb09g021410.1	0	0	0	0	0	0.098	0.8	0.046	0.812
Sb10g007090.1	Sb01g033570.1	468773	440406	4558.Sb10g007090.1	4558.Sb01g033570.1	0	0	0	0	0	0.098	0.8	0.046	0.812
Sb09g023920.1	Sb08g019700.1	467157	464811	4558.Sb09g023920.1	4558.Sb08g019700.1	0	0	0	0	0	0.098	0.8	0.046	0.812
Sb10g007090.1	Sb02g039640.1	468773	446332	4558.Sb10g007090.1	4558.Sb02g039640.1	0	0	0	0	0	0.098	0.8	0.046	0.812
Sb10g007090.1	Sb08g019700.1	468773	464811	4558.Sb10g007090.1	4558.Sb08g019700.1	0	0	0	0	0	0.098	0.8	0.046	0.812
Sb09g023920.1	SAPK4	467157	466873	4558.Sb09g023920.1	4558.Sb09g021410.1	0	0	0	0	0	0.098	0.8	0.046	0.812
SAPK4	Sb03g037740.1	466873	450332	4558.Sb09g021410.1	4558.Sb03g037740.1	0	0	0	0	0	0.098	0.8	0.046	0.812
Sb06g033990.1	Sb03g037740.1	460687	450332	4558.Sb06g033990.1	4558.Sb03g037740.1	0	0	0	0	0	0.098	0.8	0.046	0.812
Sb10g007090.1	Sb04g022410.1	468773	453301	4558.Sb10g007090.1	4558.Sb04g022410.1	0	0	0	0	0	0.098	0.8	0.046	0.812
Sb10g007090.1	Sb01g007120.1	468773	437569	4558.Sb10g007090.1	4558.Sb01g007120.1	0	0	0	0	0	0.098	0.8	0.046	0.812
Sb09g023920.1	Sb06g033990.1	467157	460687	4558.Sb09g023920.1	4558.Sb06g033990.1	0	0	0	0	0	0.098	0.8	0.046	0.812
Sb03g037740.1	Sb02g039640.1	450332	446332	4558.Sb03g037740.1	4558.Sb02g039640.1	0	0	0	0	0	0.098	0.8	0.046	0.812
Sb03g037740.1	Sb01g033570.1	450332	440406	4558.Sb03g037740.1	4558.Sb01g033570.1	0	0	0	0	0	0.098	0.8	0.046	0.812
Sb09g023920.1	Sb02g039640.1	467157	446332	4558.Sb09g023920.1	4558.Sb02g039640.1	0	0	0	0	0	0.098	0.8	0.046	0.812
Sb08g019700.1	Sb03g037740.1	464811	450332	4558.Sb08g019700.1	4558.Sb03g037740.1	0	0	0	0	0	0.098	0.8	0.046	0.812
Sb09g023920.1	Sb01g033570.1	467157	440406	4558.Sb09g023920.1	4558.Sb01g033570.1	0	0	0	0	0	0.098	0.8	0.046	0.812
Sb10g007090.1	Sb06g033990.1	468773	460687	4558.Sb10g007090.1	4558.Sb06g033990.1	0	0	0	0	0	0.098	0.8	0.046	0.812
Sb02g043450.1	Sb01g037090.1	446772	440806	4558.Sb02g043450.1	4558.Sb01g037090.1	0	0	0	0.98	0.048	0	0.8	0.52	0.803
Sb03g040970.1	Sb01g007120.1	450677	437569	4558.Sb03g040970.1	4558.Sb01g007120.1	0	0	0	0	0	0	0.8	0.051	0.802
Sb05g009360.1	Sb05g009350.1	456336	456333	4558.Sb05g009360.1	4558.Sb05g009350.1	0	0	0.534	0.987	0	0	0.8	0	0.801
Sb06g033990.1	Sb03g040970.1	460687	450677	4558.Sb06g033990.1	4558.Sb03g040970.1	0	0	0	0	0	0	0.8	0.046	0.801
Sb09g021580.1	Sb04g022410.1	466892	453301	4558.Sb09g021580.1	4558.Sb04g022410.1	0	0	0	0	0	0	0.8	0	0.8
Sb06g026410.1	Sb01g007120.1	459821	437569	4558.Sb06g026410.1	4558.Sb01g007120.1	0	0	0	0	0	0	0.8	0	0.8
Sb06g026410.1	Sb01g033570.1	459821	440406	4558.Sb06g026410.1	4558.Sb01g033570.1	0	0	0	0	0	0	0.8	0	0.8
Sb08g019700.1	Sb03g040970.1	464811	450677	4558.Sb08g019700.1	4558.Sb03g040970.1	0	0	0	0	0	0	0.8	0	0.8
Sb09g021580.1	Sb06g033990.1	466892	460687	4558.Sb09g021580.1	4558.Sb06g033990.1	0	0	0	0	0	0	0.8	0	0.8
Sb02g039640.1	Sb01g036810.1	446332	440775	4558.Sb02g039640.1	4558.Sb01g036810.1	0	0	0	0	0	0	0.8	0	0.8
Sb03g040970.1	Sb02g039640.1	450677	446332	4558.Sb03g040970.1	4558.Sb02g039640.1	0	0	0	0	0	0	0.8	0	0.8
Sb06g033990.1	Sb02g043620.1	460687	446792	4558.Sb06g033990.1	4558.Sb02g043620.1	0	0	0	0	0	0	0.8	0	0.8
Sb06g026410.1	Sb04g022410.1	459821	453301	4558.Sb06g026410.1	4558.Sb04g022410.1	0	0	0	0	0	0	0.8	0	0.8
Sb04g022410.1	Sb01g036810.1	453301	440775	4558.Sb04g022410.1	4558.Sb01g036810.1	0	0	0	0	0	0	0.8	0	0.8
Sb04g022410.1	Sb03g040970.1	453301	450677	4558.Sb04g022410.1	4558.Sb03g040970.1	0	0	0	0	0	0	0.8	0	0.8
Sb02g043620.1	Sb02g039640.1	446792	446332	4558.Sb02g043620.1	4558.Sb02g039640.1	0	0	0	0	0	0	0.8	0	0.8
Sb09g021580.1	Sb01g007120.1	466892	437569	4558.Sb09g021580.1	4558.Sb01g007120.1	0	0	0	0	0	0	0.8	0	0.8
Sb09g021580.1	SAPK4	466892	466873	4558.Sb09g021580.1	4558.Sb09g021410.1	0	0	0	0	0	0	0.8	0	0.8
SAPK4	Sb03g040970.1	466873	450677	4558.Sb09g021410.1	4558.Sb03g040970.1	0	0	0	0	0	0	0.8	0	0.8
Sb09g021580.1	Sb02g039640.1	466892	446332	4558.Sb09g021580.1	4558.Sb02g039640.1	0	0	0	0	0	0	0.8	0	0.8
SAPK4	Sb02g043620.1	466873	446792	4558.Sb09g021410.1	4558.Sb02g043620.1	0	0	0	0	0	0	0.8	0	0.8
Sb02g043620.1	Sb01g033570.1	446792	440406	4558.Sb02g043620.1	4558.Sb01g033570.1	0	0	0	0	0	0	0.8	0	0.8
Sb08g019700.1	Sb01g036810.1	464811	440775	4558.Sb08g019700.1	4558.Sb01g036810.1	0	0	0	0	0	0	0.8	0	0.8
Sb06g033990.1	Sb06g026410.1	460687	459821	4558.Sb06g033990.1	4558.Sb06g026410.1	0	0	0	0	0	0	0.8	0	0.8
Sb04g022410.1	Sb02g043620.1	453301	446792	4558.Sb04g022410.1	4558.Sb02g043620.1	0	0	0	0	0	0	0.8	0	0.8
Sb01g036810.1	Sb01g007120.1	440775	437569	4558.Sb01g036810.1	4558.Sb01g007120.1	0	0	0	0	0	0	0.8	0	0.8
SAPK4	Sb06g026410.1	466873	459821	4558.Sb09g021410.1	4558.Sb06g026410.1	0	0	0	0	0	0	0.8	0	0.8
Sb06g033990.1	Sb01g036810.1	460687	440775	4558.Sb06g033990.1	4558.Sb01g036810.1	0	0	0	0	0	0	0.8	0	0.8
Sb08g019700.1	Sb06g026410.1	464811	459821	4558.Sb08g019700.1	4558.Sb06g026410.1	0	0	0	0	0	0	0.8	0	0.8
Sb08g019700.1	Sb02g043620.1	464811	446792	4558.Sb08g019700.1	4558.Sb02g043620.1	0	0	0	0	0	0	0.8	0	0.8
Sb03g040970.1	Sb01g033570.1	450677	440406	4558.Sb03g040970.1	4558.Sb01g033570.1	0	0	0	0	0	0	0.8	0	0.8
Sb09g021580.1	Sb08g019700.1	466892	464811	4558.Sb09g021580.1	4558.Sb08g019700.1	0	0	0	0	0	0	0.8	0	0.8
Sb02g043620.1	Sb01g007120.1	446792	437569	4558.Sb02g043620.1	4558.Sb01g007120.1	0	0	0	0	0	0	0.8	0	0.8
Sb01g036810.1	Sb01g033570.1	440775	440406	4558.Sb01g036810.1	4558.Sb01g033570.1	0	0	0	0	0	0	0.8	0	0.8
SAPK4	Sb01g036810.1	466873	440775	4558.Sb09g021410.1	4558.Sb01g036810.1	0	0	0	0	0	0	0.8	0	0.8
Sb09g021580.1	Sb01g033570.1	466892	440406	4558.Sb09g021580.1	4558.Sb01g033570.1	0	0	0	0	0	0	0.8	0	0.8
Sb06g026410.1	Sb02g039640.1	459821	446332	4558.Sb06g026410.1	4558.Sb02g039640.1	0	0	0	0	0	0	0.8	0	0.8
Sb07g028940.1	Sb06g025710.1	463112	459743	4558.Sb07g028940.1	4558.Sb06g025710.1	0	0	0	0	0	0.369	0.445	0.433	0.784
Sb02g022090.1	Sb01g038750.1	444261	440993	4558.Sb02g022090.1	4558.Sb01g038750.1	0	0	0	0	0	0.482	0.33	0.34	0.75
Sb09g029080.1	Sb01g038750.1	467736	440993	4558.Sb09g029080.1	4558.Sb01g038750.1	0	0	0	0	0	0.482	0.33	0.34	0.75
Sb10g003810.1	Sb03g026070.1	468381	448964	4558.Sb10g003810.1	4558.Sb03g026070.1	0	0	0	0	0	0.482	0.33	0.34	0.75
Sb10g003810.1	Sb09g029080.1	468381	467736	4558.Sb10g003810.1	4558.Sb09g029080.1	0	0	0	0	0	0.482	0.33	0.34	0.75
Sb03g032740.1	Sb01g038750.1	449756	440993	4558.Sb03g032740.1	4558.Sb01g038750.1	0	0	0	0	0	0.482	0.33	0.34	0.75
Sb03g039630.1	Sb01g038750.1	450531	440993	4558.Sb03g039630.1	4558.Sb01g038750.1	0	0	0	0	0	0.482	0.33	0.34	0.75
Sb06g001720.1	Sb01g038750.1	457941	440993	4558.Sb06g001720.1	4558.Sb01g038750.1	0	0	0	0	0	0.482	0.33	0.34	0.75
Sb10g003810.1	Sb01g039890.1	468381	441132	4558.Sb10g003810.1	4558.Sb01g039890.1	0	0	0	0	0	0.482	0.33	0.34	0.75
Sb10g003810.1	Sb09g026860.1	468381	467486	4558.Sb10g003810.1	4558.Sb09g026860.1	0	0	0	0	0	0.482	0.33	0.34	0.75
Sb03g026070.1	Sb01g038750.1	448964	440993	4558.Sb03g026070.1	4558.Sb01g038750.1	0	0	0	0	0	0.482	0.33	0.34	0.75
Sb10g003810.1	Sb02g022090.1	468381	444261	4558.Sb10g003810.1	4558.Sb02g022090.1	0	0	0	0	0	0.482	0.33	0.34	0.75
Sb10g003810.1	Sb06g001720.1	468381	457941	4558.Sb10g003810.1	4558.Sb06g001720.1	0	0	0	0	0	0.482	0.33	0.34	0.75
Sb09g026860.1	Sb01g038750.1	467486	440993	4558.Sb09g026860.1	4558.Sb01g038750.1	0	0	0	0	0	0.482	0.33	0.34	0.75
Sb10g003810.1	Sb09g030600.1	468381	467913	4558.Sb10g003810.1	4558.Sb09g030600.1	0	0	0	0	0	0.482	0.33	0.34	0.75
Sb09g022410.1	Sb01g038750.1	466989	440993	4558.Sb09g022410.1	4558.Sb01g038750.1	0	0	0	0	0	0.482	0.33	0.34	0.75
Sb10g003810.1	Sb03g029890.1	468381	449416	4558.Sb10g003810.1	4558.Sb03g029890.1	0	0	0	0	0	0.482	0.33	0.34	0.75
Sb10g003810.1	Sb03g032740.1	468381	449756	4558.Sb10g003810.1	4558.Sb03g032740.1	0	0	0	0	0	0.482	0.33	0.34	0.75
Sb10g003810.1	Sb03g039630.1	468381	450531	4558.Sb10g003810.1	4558.Sb03g039630.1	0	0	0	0	0	0.482	0.33	0.34	0.75
Sb03g029890.1	Sb01g038750.1	449416	440993	4558.Sb03g029890.1	4558.Sb01g038750.1	0	0	0	0	0	0.482	0.33	0.34	0.75
Sb09g030600.1	Sb01g038750.1	467913	440993	4558.Sb09g030600.1	4558.Sb01g038750.1	0	0	0	0	0	0.482	0.33	0.34	0.75
Sb10g003810.1	Sb09g022410.1	468381	466989	4558.Sb10g003810.1	4558.Sb09g022410.1	0	0	0	0	0	0.482	0.33	0.34	0.75
Sb01g039890.1	Sb01g038750.1	441132	440993	4558.Sb01g039890.1	4558.Sb01g038750.1	0	0	0	0	0	0.482	0.33	0.34	0.75
Sb04g021990.1	Sb0010s007790.1	453248	436510	4558.Sb04g021990.1	4558.Sb0010s007790.1	0	0	0	0	0.062	0.537	0	0.465	0.747
Sb09g022410.1	Sb01g028330.1	466989	439774	4558.Sb09g022410.1	4558.Sb01g028330.1	0	0	0	0	0	0.697	0	0.097	0.714
Sb01g049020.1	Sb01g038750.1	442160	440993	4558.Sb01g049020.1	4558.Sb01g038750.1	0	0	0	0	0.063	0.11	0.445	0.434	0.702
Sb01g038750.1	Sb01g030570.1	440993	440052	4558.Sb01g038750.1	4558.Sb01g030570.1	0	0	0	0	0.063	0.11	0.445	0.434	0.702
Sb10g003810.1	Sb01g030570.1	468381	440052	4558.Sb10g003810.1	4558.Sb01g030570.1	0	0	0	0	0.063	0.11	0.445	0.434	0.702
Sb10g003810.1	Sb01g049020.1	468381	442160	4558.Sb10g003810.1	4558.Sb01g049020.1	0	0	0	0	0.063	0.11	0.445	0.434	0.702
Sb06g025710.1	Sb01g038750.1	459743	440993	4558.Sb06g025710.1	4558.Sb01g038750.1	0	0	0	0	0	0.111	0.445	0.444	0.701
Sb10g003810.1	Sb06g025710.1	468381	459743	4558.Sb10g003810.1	4558.Sb06g025710.1	0	0	0	0	0	0.111	0.445	0.444	0.701
Sb10g026910.1	Sb01g005670.1	470361	437411	4558.Sb10g026910.1	4558.Sb01g005670.1	0	0	0	0	0.093	0	0	0.666	0.684
Sb09g022410.1	Sb02g039640.1	466989	446332	4558.Sb09g022410.1	4558.Sb02g039640.1	0.378	0	0	0	0.121	0.111	0.274	0.196	0.664
Sb09g022410.1	Sb06g033990.1	466989	460687	4558.Sb09g022410.1	4558.Sb06g033990.1	0.378	0	0	0	0.121	0.111	0.274	0.196	0.664
Sb09g022410.1	SAPK4	466989	466873	4558.Sb09g022410.1	4558.Sb09g021410.1	0.378	0	0	0	0.121	0.111	0.274	0.196	0.664
Sb09g022410.1	Sb01g033570.1	466989	440406	4558.Sb09g022410.1	4558.Sb01g033570.1	0.378	0	0	0	0.121	0.111	0.274	0.196	0.664
Sb09g022410.1	Sb04g022410.1	466989	453301	4558.Sb09g022410.1	4558.Sb04g022410.1	0.378	0	0	0	0.121	0.111	0.274	0.196	0.664
Sb09g022410.1	Sb08g019700.1	466989	464811	4558.Sb09g022410.1	4558.Sb08g019700.1	0.378	0	0	0	0.121	0.111	0.274	0.196	0.664
Sb08g003760.1	Sb02g026570.1	463596	444818	4558.Sb08g003760.1	4558.Sb02g026570.1	0	0	0	0.943	0	0.634	0	0.265	0.638
Sb09g030600.1	Sb08g003760.1	467913	463596	4558.Sb09g030600.1	4558.Sb08g003760.1	0	0	0	0	0.063	0.611	0	0.083	0.636
Sb08g003760.1	Sb03g026070.1	463596	448964	4558.Sb08g003760.1	4558.Sb03g026070.1	0	0	0	0	0.063	0.611	0	0.083	0.636
Sb09g022410.1	Sb04g009280.1	466989	452571	4558.Sb09g022410.1	4558.Sb04g009280.1	0	0	0	0	0	0.593	0	0.075	0.607
Sb09g022410.1	Sb09g006700.1	466989	466074	4558.Sb09g022410.1	4558.Sb09g006700.1	0	0	0	0	0	0.593	0	0.075	0.607
Sb08g003760.1	Sb03g040510.1	463596	450625	4558.Sb08g003760.1	4558.Sb03g040510.1	0	0	0	0.796	0	0.579	0	0.336	0.605
Sb10g026910.1	Sb01g003880.1	470361	437202	4558.Sb10g026910.1	4558.Sb01g003880.1	0	0	0	0	0	0	0	0.602	0.602
Sb09g022410.1	Sb01g038150.1	466989	440927	4558.Sb09g022410.1	4558.Sb01g038150.1	0	0	0	0	0	0.571	0	0.097	0.596
Sb09g023180.1	Sb09g022410.1	467072	466989	4558.Sb09g023180.1	4558.Sb09g022410.1	0	0	0	0	0	0.571	0	0.097	0.596
Sb09g022410.1	PYL5	466989	450422	4558.Sb09g022410.1	4558.Sb03g038600.1	0	0	0	0	0	0.571	0	0.097	0.596
Sb10g003810.1	Sb01g038750.1	468381	440993	4558.Sb10g003810.1	4558.Sb01g038750.1	0	0	0.529	0.981	0	0.126	0.543	0.641	0.592
Sb06g025710.1	Sb01g017050.1	459743	438701	4558.Sb06g025710.1	4558.Sb01g017050.1	0	0	0	0	0	0.111	0.299	0.38	0.579
Sb10g003810.1	Sb04g022410.1	468381	453301	4558.Sb10g003810.1	4558.Sb04g022410.1	0	0	0.401	0.671	0.047	0.219	0.299	0.433	0.569
Sb10g003810.1	Sb01g007120.1	468381	437569	4558.Sb10g003810.1	4558.Sb01g007120.1	0	0	0.42	0.68	0.047	0.219	0.299	0.433	0.569
Sb10g003810.1	Sb01g033570.1	468381	440406	4558.Sb10g003810.1	4558.Sb01g033570.1	0	0	0.422	0.679	0.047	0.219	0.299	0.433	0.569
Sb10g003810.1	Sb08g019700.1	468381	464811	4558.Sb10g003810.1	4558.Sb08g019700.1	0	0	0.428	0.686	0.047	0.219	0.299	0.433	0.568
Sb10g003810.1	Sb02g039640.1	468381	446332	4558.Sb10g003810.1	4558.Sb02g039640.1	0	0	0.412	0.682	0.047	0.219	0.299	0.433	0.567
Sb10g003810.1	Sb06g033990.1	468381	460687	4558.Sb10g003810.1	4558.Sb06g033990.1	0	0	0.39	0.672	0.047	0.219	0.299	0.433	0.567
Sb10g003810.1	SAPK4	468381	466873	4558.Sb10g003810.1	4558.Sb09g021410.1	0	0	0.386	0.675	0.047	0.219	0.299	0.433	0.565
Sb01g038750.1	Sb01g007120.1	440993	437569	4558.Sb01g038750.1	4558.Sb01g007120.1	0	0	0.38	0.678	0.047	0.219	0.299	0.433	0.563
Sb07g028940.1	Sb01g038750.1	463112	440993	4558.Sb07g028940.1	4558.Sb01g038750.1	0	0	0	0	0	0.295	0.144	0.328	0.559
Sb02g039640.1	Sb01g038750.1	446332	440993	4558.Sb02g039640.1	4558.Sb01g038750.1	0	0	0.376	0.686	0.047	0.219	0.299	0.433	0.559
Sb10g003810.1	Sb07g028940.1	468381	463112	4558.Sb10g003810.1	4558.Sb07g028940.1	0	0	0	0	0	0.295	0.144	0.328	0.559
Sb08g019700.1	Sb01g038750.1	464811	440993	4558.Sb08g019700.1	4558.Sb01g038750.1	0	0	0.391	0.694	0.047	0.219	0.299	0.433	0.559
Sb03g040510.1	Sb01g039890.1	450625	441132	4558.Sb03g040510.1	4558.Sb01g039890.1	0	0	0	0	0	0.54	0	0.08	0.558
Sb09g022410.1	Sb03g040510.1	466989	450625	4558.Sb09g022410.1	4558.Sb03g040510.1	0	0	0	0	0	0.54	0	0.08	0.558
Sb03g040510.1	Sb03g039630.1	450625	450531	4558.Sb03g040510.1	4558.Sb03g039630.1	0	0	0	0	0	0.54	0	0.08	0.558
Sb01g038750.1	Sb01g033570.1	440993	440406	4558.Sb01g038750.1	4558.Sb01g033570.1	0	0	0.38	0.696	0.047	0.219	0.299	0.433	0.556
Sb04g022410.1	Sb01g038750.1	453301	440993	4558.Sb04g022410.1	4558.Sb01g038750.1	0	0	0.341	0.678	0.047	0.219	0.299	0.433	0.556
Sb06g033990.1	Sb01g038750.1	460687	440993	4558.Sb06g033990.1	4558.Sb01g038750.1	0	0	0.336	0.682	0.047	0.219	0.299	0.433	0.554
SAPK4	Sb01g038750.1	466873	440993	4558.Sb09g021410.1	4558.Sb01g038750.1	0	0	0.346	0.693	0.047	0.219	0.299	0.433	0.552
Sb10g026910.1	Sb03g034680.1	470361	449979	4558.Sb10g026910.1	4558.Sb03g034680.1	0	0	0	0	0.091	0	0	0.516	0.541
Sb07g021630.1	Sb05g009360.1	462239	456336	4558.Sb07g021630.1	4558.Sb05g009360.1	0.06	0	0	0	0.059	0.099	0.299	0.278	0.523
Sb07g021630.1	Sb05g009350.1	462239	456333	4558.Sb07g021630.1	4558.Sb05g009350.1	0.06	0	0	0	0.059	0.099	0.299	0.278	0.523
Sb07g021630.1	Sb01g008730.1	462239	437755	4558.Sb07g021630.1	4558.Sb01g008730.1	0.06	0	0	0	0.059	0.099	0.299	0.278	0.523
Sb10g023010.1	Sb07g028940.1	469911	463112	4558.Sb10g023010.1	4558.Sb07g028940.1	0	0	0	0	0.513	0	0	0.06	0.522
Sb01g028330.1	Sb01g007120.1	439774	437569	4558.Sb01g028330.1	4558.Sb01g007120.1	0	0	0	0	0	0.188	0	0.434	0.52
Sb03g006450.1	Sb01g017050.1	447611	438701	4558.Sb03g006450.1	4558.Sb01g017050.1	0	0	0	0	0.165	0.174	0.299	0.099	0.506
Sb06g008585.1	Sb01g017050.1	458229	438701	4558.Sb06g008585.1	4558.Sb01g017050.1	0	0	0	0	0.165	0.174	0.299	0.099	0.506
Sb01g028870.1	Sb01g017050.1	439838	438701	4558.Sb01g028870.1	4558.Sb01g017050.1	0	0	0	0	0.165	0.174	0.299	0.099	0.506
Sb03g040510.1	Sb01g003880.1	450625	437202	4558.Sb03g040510.1	4558.Sb01g003880.1	0	0	0	0	0	0	0	0.48	0.48
Sb07g021630.1	Sb01g003880.1	462239	437202	4558.Sb07g021630.1	4558.Sb01g003880.1	0.044	0	0	0	0.098	0.092	0.299	0.195	0.477
Sb05g005470.1	Sb01g003880.1	455827	437202	4558.Sb05g005470.1	4558.Sb01g003880.1	0.044	0	0	0	0.098	0.092	0.299	0.195	0.477
Sb08g004840.1	Sb01g003880.1	463726	437202	4558.Sb08g004840.1	4558.Sb01g003880.1	0.044	0	0	0	0.098	0.092	0.299	0.195	0.477
Sb02g025790.1	Sb01g003880.1	444721	437202	4558.Sb02g025790.1	4558.Sb01g003880.1	0.044	0	0	0	0.098	0.092	0.299	0.195	0.477
Sb09g030600.1	Sb03g040510.1	467913	450625	4558.Sb09g030600.1	4558.Sb03g040510.1	0	0	0	0	0	0.113	0	0.433	0.475
Sb03g040510.1	Sb03g026070.1	450625	448964	4558.Sb03g040510.1	4558.Sb03g026070.1	0	0	0	0	0	0.113	0	0.433	0.475
Sb02g025790.1	Sb01g008730.1	444721	437755	4558.Sb02g025790.1	4558.Sb01g008730.1	0.06	0	0	0	0.064	0.099	0.299	0.196	0.471
Sb10g003810.1	HK1	468381	437919	4558.Sb10g003810.1	4558.Sb01g010070.1	0	0	0	0	0	0.097	0	0.433	0.466
Sb01g038750.1	HK1	440993	437919	4558.Sb01g038750.1	4558.Sb01g010070.1	0	0	0	0	0	0.097	0	0.433	0.466
Sb10g026910.1	Sb03g040510.1	470361	450625	4558.Sb10g026910.1	4558.Sb03g040510.1	0	0	0	0	0	0	0	0.459	0.459
Sb08g004840.1	Sb01g008730.1	463726	437755	4558.Sb08g004840.1	4558.Sb01g008730.1	0.06	0	0	0	0	0.099	0.299	0.196	0.458
Sb05g005470.1	Sb01g008730.1	455827	437755	4558.Sb05g005470.1	4558.Sb01g008730.1	0.06	0	0	0	0	0.099	0.299	0.196	0.458
Sb04g008040.1	Sb01g007120.1	452415	437569	4558.Sb04g008040.1	4558.Sb01g007120.1	0	0	0	0	0	0	0	0.458	0.457
Sb10g022200.1	Sb01g007120.1	469810	437569	4558.Sb10g022200.1	4558.Sb01g007120.1	0	0	0	0	0	0	0	0.458	0.457
Sb01g005670.1	Sb01g003880.1	437411	437202	4558.Sb01g005670.1	4558.Sb01g003880.1	0	0	0	0	0	0	0	0.448	0.448
Sb03g039630.1	Sb01g038670.1	450531	440985	4558.Sb03g039630.1	4558.Sb01g038670.1	0	0	0	0	0	0	0	0.433	0.433
Sb09g029080.1	Sb01g038670.1	467736	440985	4558.Sb09g029080.1	4558.Sb01g038670.1	0	0	0	0	0	0	0	0.433	0.433
Sb03g029890.1	Sb01g038670.1	449416	440985	4558.Sb03g029890.1	4558.Sb01g038670.1	0	0	0	0	0	0	0	0.433	0.433
Sb01g038760.1	Sb0010s007790.1	440994	436510	4558.Sb01g038760.1	4558.Sb0010s007790.1	0	0	0	0	0	0	0	0.433	0.433
Sb10g023010.1	Sb05g027870.1	469911	457721	4558.Sb10g023010.1	4558.Sb05g027870.1	0.378	0	0	0	0.126	0	0	0	0.433
Sb01g045920.1	HK1	441796	437919	4558.Sb01g045920.1	4558.Sb01g010070.1	0	0	0	0	0	0	0	0.429	0.429
Sb07g028940.1	Sb06g033990.1	463112	460687	4558.Sb07g028940.1	4558.Sb06g033990.1	0	0	0	0	0	0.195	0.294	0.074	0.427
Sb07g028940.1	Sb01g007120.1	463112	437569	4558.Sb07g028940.1	4558.Sb01g007120.1	0	0	0	0	0	0.195	0.294	0.074	0.427
Sb07g028940.1	Sb01g033570.1	463112	440406	4558.Sb07g028940.1	4558.Sb01g033570.1	0	0	0	0	0	0.195	0.294	0.074	0.427
SAPK4	Sb07g028940.1	466873	463112	4558.Sb09g021410.1	4558.Sb07g028940.1	0	0	0	0	0	0.195	0.294	0.074	0.427
Sb08g019700.1	Sb07g028940.1	464811	463112	4558.Sb08g019700.1	4558.Sb07g028940.1	0	0	0	0	0	0.195	0.294	0.074	0.427
Sb07g028940.1	Sb04g022410.1	463112	453301	4558.Sb07g028940.1	4558.Sb04g022410.1	0	0	0	0	0	0.195	0.294	0.074	0.427
Sb07g028940.1	Sb02g039640.1	463112	446332	4558.Sb07g028940.1	4558.Sb02g039640.1	0	0	0	0	0	0.195	0.294	0.074	0.427
Sb10g003810.1	CBL01	468381	439825	4558.Sb10g003810.1	4558.Sb01g028750.1	0	0	0	0	0.044	0.18	0	0.327	0.426
Sb01g038750.1	CBL01	440993	439825	4558.Sb01g038750.1	4558.Sb01g028750.1	0	0	0	0	0.044	0.18	0	0.327	0.426
Sb10g003810.1	Sb05g027870.1	468381	457721	4558.Sb10g003810.1	4558.Sb05g027870.1	0	0	0	0	0.042	0	0.402	0.072	0.421
Sb05g027870.1	Sb01g038750.1	457721	440993	4558.Sb05g027870.1	4558.Sb01g038750.1	0	0	0	0	0.042	0	0.402	0.072	0.421
Sb01g045920.1	Sb01g033570.1	441796	440406	4558.Sb01g045920.1	4558.Sb01g033570.1	0.378	0	0	0	0	0.068	0	0.069	0.413
Sb04g022410.1	Sb01g045920.1	453301	441796	4558.Sb04g022410.1	4558.Sb01g045920.1	0.378	0	0	0	0	0.068	0	0.069	0.413
Sb08g019700.1	Sb01g045920.1	464811	441796	4558.Sb08g019700.1	4558.Sb01g045920.1	0.378	0	0	0	0	0.068	0	0.069	0.413
Sb02g039640.1	Sb01g045920.1	446332	441796	4558.Sb02g039640.1	4558.Sb01g045920.1	0.378	0	0	0	0	0.068	0	0.069	0.413
SAPK4	Sb01g045920.1	466873	441796	4558.Sb09g021410.1	4558.Sb01g045920.1	0.378	0	0	0	0	0.068	0	0.069	0.413
Sb01g045920.1	Sb01g007120.1	441796	437569	4558.Sb01g045920.1	4558.Sb01g007120.1	0.378	0	0	0	0	0.068	0	0.069	0.413
Sb06g033990.1	Sb01g045920.1	460687	441796	4558.Sb06g033990.1	4558.Sb01g045920.1	0.378	0	0	0	0	0.068	0	0.069	0.413
Sb09g026860.1	Sb01g005670.1	467486	437411	4558.Sb09g026860.1	4558.Sb01g005670.1	0	0	0	0	0	0	0	0.412	0.412
Sb01g039890.1	Sb01g005670.1	441132	437411	4558.Sb01g039890.1	4558.Sb01g005670.1	0	0	0	0	0	0	0	0.412	0.412
Sb02g022090.1	Sb01g005670.1	444261	437411	4558.Sb02g022090.1	4558.Sb01g005670.1	0	0	0	0	0	0	0	0.412	0.412
Sb03g032740.1	Sb01g005670.1	449756	437411	4558.Sb03g032740.1	4558.Sb01g005670.1	0	0	0	0	0	0	0	0.412	0.412
Sb03g026070.1	Sb01g005670.1	448964	437411	4558.Sb03g026070.1	4558.Sb01g005670.1	0	0	0	0	0	0	0	0.412	0.412
Sb03g039630.1	Sb01g005670.1	450531	437411	4558.Sb03g039630.1	4558.Sb01g005670.1	0	0	0	0	0	0	0	0.412	0.412
Sb03g029890.1	Sb01g005670.1	449416	437411	4558.Sb03g029890.1	4558.Sb01g005670.1	0	0	0	0	0	0	0	0.412	0.412
Sb09g030600.1	Sb01g005670.1	467913	437411	4558.Sb09g030600.1	4558.Sb01g005670.1	0	0	0	0	0	0	0	0.412	0.412
Sb06g001720.1	Sb01g005670.1	457941	437411	4558.Sb06g001720.1	4558.Sb01g005670.1	0	0	0	0	0	0	0	0.412	0.412
Sb09g022410.1	Sb01g005670.1	466989	437411	4558.Sb09g022410.1	4558.Sb01g005670.1	0	0	0	0	0	0	0	0.412	0.412
Sb09g029080.1	Sb01g005670.1	467736	437411	4558.Sb09g029080.1	4558.Sb01g005670.1	0	0	0	0	0	0	0	0.412	0.412
Sb06g001720.1	Sb01g045920.1	457941	441796	4558.Sb06g001720.1	4558.Sb01g045920.1	0.378	0	0	0	0.065	0	0	0.069	0.411
Sb02g022090.1	Sb01g045920.1	444261	441796	4558.Sb02g022090.1	4558.Sb01g045920.1	0.378	0	0	0	0.065	0	0	0.069	0.411
Sb03g032740.1	Sb01g045920.1	449756	441796	4558.Sb03g032740.1	4558.Sb01g045920.1	0.378	0	0	0	0.065	0	0	0.069	0.411
Sb03g026070.1	Sb01g045920.1	448964	441796	4558.Sb03g026070.1	4558.Sb01g045920.1	0.378	0	0	0	0.065	0	0	0.069	0.411
Sb09g029080.1	Sb01g045920.1	467736	441796	4558.Sb09g029080.1	4558.Sb01g045920.1	0.378	0	0	0	0.065	0	0	0.069	0.411
Sb09g026860.1	Sb01g045920.1	467486	441796	4558.Sb09g026860.1	4558.Sb01g045920.1	0.378	0	0	0	0.065	0	0	0.069	0.411
Sb03g029890.1	Sb01g045920.1	449416	441796	4558.Sb03g029890.1	4558.Sb01g045920.1	0.378	0	0	0	0.065	0	0	0.069	0.411
Sb03g039630.1	Sb01g045920.1	450531	441796	4558.Sb03g039630.1	4558.Sb01g045920.1	0.378	0	0	0	0.065	0	0	0.069	0.411
Sb09g030600.1	Sb01g045920.1	467913	441796	4558.Sb09g030600.1	4558.Sb01g045920.1	0.378	0	0	0	0.065	0	0	0.069	0.411
Sb09g022410.1	Sb01g045920.1	466989	441796	4558.Sb09g022410.1	4558.Sb01g045920.1	0.378	0	0	0	0.065	0	0	0.069	0.411
Sb01g045920.1	Sb01g039890.1	441796	441132	4558.Sb01g045920.1	4558.Sb01g039890.1	0.378	0	0	0	0.065	0	0	0.069	0.411
Sb06g025710.1	HK1	459743	437919	4558.Sb06g025710.1	4558.Sb01g010070.1	0	0	0	0	0	0.156	0	0.328	0.408

## Sheet: Serine threonine-protein kinase
Table S5: Description PPI data used as an input for pathway network analysis:Serine threonine-protein kinase and Abscisic acid receptor (Pyrabactin resistance 1-like 5) as a source node
#node1	node2	node1_string_internal_id	node2_string_internal_id	node1_external_id	node2_external_id	neighborhood_on_chromosome	gene_fusion	phylogenetic_cooccurrence	homology	coexpression	experimentally_determined_interaction	database_annotated	automated_textmining	combined_score
PYL5	Sb03g026070.1	450422	448964	4558.Sb03g038600.1	4558.Sb03g026070.1	0	0	0	0	0	0.589	0.8	0.367	0.943
SAPK4	Sb02g022090.1	466873	444261	4558.Sb09g021410.1	4558.Sb02g022090.1	0.378	0	0	0	0.121	0.111	0.848	0.196	0.93
SAPK4	Sb06g001720.1	466873	457941	4558.Sb09g021410.1	4558.Sb06g001720.1	0.378	0	0	0	0.121	0.111	0.848	0.196	0.93
SAPK4	Sb01g039890.1	466873	441132	4558.Sb09g021410.1	4558.Sb01g039890.1	0.378	0	0	0	0.121	0.111	0.848	0.196	0.93
SAPK4	Sb03g026070.1	466873	448964	4558.Sb09g021410.1	4558.Sb03g026070.1	0.378	0	0	0	0.121	0.111	0.848	0.196	0.93
SAPK4	Sb03g029890.1	466873	449416	4558.Sb09g021410.1	4558.Sb03g029890.1	0.378	0	0	0	0.121	0.111	0.848	0.196	0.93
SAPK4	Sb03g039630.1	466873	450531	4558.Sb09g021410.1	4558.Sb03g039630.1	0.378	0	0	0	0.121	0.111	0.848	0.196	0.93
SAPK4	Sb03g032740.1	466873	449756	4558.Sb09g021410.1	4558.Sb03g032740.1	0.378	0	0	0	0.121	0.111	0.848	0.196	0.93
PYL5	Sb01g039890.1	450422	441132	4558.Sb03g038600.1	4558.Sb01g039890.1	0	0	0	0	0	0.571	0.8	0.097	0.915
PYL5	Sb03g032740.1	450422	449756	4558.Sb03g038600.1	4558.Sb03g032740.1	0	0	0	0	0	0.114	0.8	0.097	0.826
PYL5	Sb02g022090.1	450422	444261	4558.Sb03g038600.1	4558.Sb02g022090.1	0	0	0	0	0	0.114	0.8	0.097	0.826
PYL5	Sb03g029890.1	450422	449416	4558.Sb03g038600.1	4558.Sb03g029890.1	0	0	0	0	0	0.114	0.8	0.097	0.826
SAPK4	Sb08g003760.1	466873	463596	4558.Sb09g021410.1	4558.Sb08g003760.1	0	0	0	0	0	0.111	0.8	0.079	0.821
SAPK4	Sb03g040510.1	466873	450625	4558.Sb09g021410.1	4558.Sb03g040510.1	0	0	0	0	0	0.13	0.8	0.046	0.819
SAPK4	Sb02g026570.1	466873	444818	4558.Sb09g021410.1	4558.Sb02g026570.1	0	0	0	0	0	0.13	0.8	0	0.818
SAPK4	Sb03g037740.1	466873	450332	4558.Sb09g021410.1	4558.Sb03g037740.1	0	0	0	0	0	0.098	0.8	0.046	0.812
SAPK4	Sb03g040970.1	466873	450677	4558.Sb09g021410.1	4558.Sb03g040970.1	0	0	0	0	0	0	0.8	0	0.8
SAPK4	Sb02g043620.1	466873	446792	4558.Sb09g021410.1	4558.Sb02g043620.1	0	0	0	0	0	0	0.8	0	0.8
SAPK4	Sb06g026410.1	466873	459821	4558.Sb09g021410.1	4558.Sb06g026410.1	0	0	0	0	0	0	0.8	0	0.8
SAPK4	Sb01g036810.1	466873	440775	4558.Sb09g021410.1	4558.Sb01g036810.1	0	0	0	0	0	0	0.8	0	0.8
SAPK4	Sb01g038750.1	466873	440993	4558.Sb09g021410.1	4558.Sb01g038750.1	0	0	0.346	0.693	0.047	0.219	0.299	0.433	0.552
SAPK4	Sb07g028940.1	466873	463112	4558.Sb09g021410.1	4558.Sb07g028940.1	0	0	0	0	0	0.195	0.294	0.074	0.427
SAPK4	Sb01g045920.1	466873	441796	4558.Sb09g021410.1	4558.Sb01g045920.1	0.378	0	0	0	0	0.068	0	0.069	0.413

## Sheet: Recovered_Sheet1
Table S5: Description of PPI data used as an input for pathway network analysis:Serine threonine-protein kinase and Abscisic acid receptor (Pyrabactin resistance 1-like 5) as a source node
#node1	node2	node1_string_internal_id	node2_string_internal_id	node1_external_id	node2_external_id	neighborhood_on_chromosome	gene_fusion	phylogenetic_cooccurrence	homology	coexpression	experimentally_determined_interaction	database_annotated	automated_textmining	combined_score
Sb09g030600.1	PYL5	467913	450422	4558.Sb09g030600.1	4558.Sb03g038600.1	0	0	0	0	0	0.589	0.8	0.367	0.943
Sb09g030600.1	SAPK4	467913	466873	4558.Sb09g030600.1	4558.Sb09g021410.1	0.378	0	0	0	0.121	0.111	0.848	0.196	0.93
Sb09g029080.1	SAPK4	467736	466873	4558.Sb09g029080.1	4558.Sb09g021410.1	0.378	0	0	0	0.121	0.111	0.848	0.196	0.93
Sb09g026860.1	SAPK4	467486	466873	4558.Sb09g026860.1	4558.Sb09g021410.1	0.378	0	0	0	0.121	0.111	0.848	0.196	0.93
Sb03g039630.1	PYL5	450531	450422	4558.Sb03g039630.1	4558.Sb03g038600.1	0	0	0	0	0	0.571	0.8	0.097	0.915
Sb09g029080.1	PYL5	467736	450422	4558.Sb09g029080.1	4558.Sb03g038600.1	0	0	0	0	0	0.114	0.8	0.097	0.826
Sb06g001720.1	PYL5	457941	450422	4558.Sb06g001720.1	4558.Sb03g038600.1	0	0	0	0	0	0.114	0.8	0.097	0.826
Sb09g026860.1	PYL5	467486	450422	4558.Sb09g026860.1	4558.Sb03g038600.1	0	0	0	0	0	0.114	0.8	0.097	0.826
Sb10g007090.1	SAPK4	468773	466873	4558.Sb10g007090.1	4558.Sb09g021410.1	0	0	0	0	0	0.098	0.8	0.046	0.812
Sb09g023920.1	SAPK4	467157	466873	4558.Sb09g023920.1	4558.Sb09g021410.1	0	0	0	0	0	0.098	0.8	0.046	0.812
Sb09g021580.1	SAPK4	466892	466873	4558.Sb09g021580.1	4558.Sb09g021410.1	0	0	0	0	0	0	0.8	0	0.8
Sb09g022410.1	SAPK4	466989	466873	4558.Sb09g022410.1	4558.Sb09g021410.1	0.378	0	0	0	0.121	0.111	0.274	0.196	0.664
Sb09g022410.1	PYL5	466989	450422	4558.Sb09g022410.1	4558.Sb03g038600.1	0	0	0	0	0	0.571	0	0.097	0.596
Sb10g003810.1	SAPK4	468381	466873	4558.Sb10g003810.1	4558.Sb09g021410.1	0	0	0.386	0.675	0.047	0.219	0.299	0.433	0.565
Sb10g003810.1	HK1	468381	437919	4558.Sb10g003810.1	4558.Sb01g010070.1	0	0	0	0	0	0.097	0	0.433	0.466
Sb01g038750.1	HK1	440993	437919	4558.Sb01g038750.1	4558.Sb01g010070.1	0	0	0	0	0	0.097	0	0.433	0.466
Sb01g045920.1	HK1	441796	437919	4558.Sb01g045920.1	4558.Sb01g010070.1	0	0	0	0	0	0	0	0.429	0.429
Sb10g003810.1	CBL01	468381	439825	4558.Sb10g003810.1	4558.Sb01g028750.1	0	0	0	0	0.044	0.18	0	0.327	0.426
Sb01g038750.1	CBL01	440993	439825	4558.Sb01g038750.1	4558.Sb01g028750.1	0	0	0	0	0.044	0.18	0	0.327	0.426
Sb06g025710.1	HK1	459743	437919	4558.Sb06g025710.1	4558.Sb01g010070.1	0	0	0	0	0	0.156	0	0.328	0.408
